# Supplementary material for: Gene regulatory patterning codes in early cell fate specification of the C. elegans embryo
Source: bioRxiv preprint, doi:10.1101/2023.02.05.527193, version 2 (2023-05-05)
Supplement: Table S6 [file 527193_file04.xlsx]

## Sheet: Average expression
			P0	AB	P1	ABa	ABp	EMS	P2	ABax	ABpx	MS	E	C	P3 (8-cell stage)	ABala	ABalp	ABara	ABarp	ABpxa	ABpxp	MSx	Ea 15	Ep 15	Cx	P3 15	ABalaa	ABalap	ABalpa	ABalpp	ABaraa	ABarap	ABarpa	ABarpp	ABpxaa	ABpxap	ABpxpa	ABpxpp	MSxa	MSxp	Ea (28-cell stage)	Ep (28-cell stage)	Cxa	Cxp	D	P4 (28-cell stage)	ABalaaa	ABalaap	ABalapa
2L52.1	2L52.1	WBGene00007063	0.997811	9.14458	3.63351	2.62062	0	3.52559	10.2835	1.34949	2.40649	3.54184	1.51695	1.65434	0.379964	2.91227	5.32639	5.95765	3.4113	2.82421	4.8891	6.79996	11.1328	5.28593	3.98085	0.853508	0	4.93162	3.7086	2.81728	5.19444	2.48366	5.8436	9.08671	7.2668	8.57093	9.77544	9.83019	8.53701	6.20262	10.7825	8.81621	10.9903	9.76183	6.20579	1.28804	5.80703	3.03728	22.3691
2RSSE.1	2RSSE.1	WBGene00007064	0	0	0	0	1.20939	0	0	0.398783	0.421019	0	0	0	0.262177	0	0	0	0	0.418694	0.811948	0.516505	0	1.92063	0	0	0	0.839141	0	0	0	0	0	0.72956	0	0	0.194083	0	0	0	2.42417	0	0	0.574563	0	0	0	0	0
2RSSE.2	2RSSE.2	WBGene00044165	0	0	0	0	0	0	0	0	0	0	0	0	0	0.970518	0	0	0	0	0	0	0	0	0	3.04202	0	0	0	0	0	0	0	0	0	0	0	0	0	0	0	0	0	0	0	0	0	0	0
3R5.1	pot-3	WBGene00007065	20.3607	19.6341	17.7111	6.36126	4.1497	16.7754	11.8026	5.87869	5.01787	7.99464	4.87906	9.7114	12.6375	3.58724	3.94463	2.52652	6.05074	1.14822	2.97466	1.89798	7.47007	0.783866	8.33136	13.9604	1.51999	1.66676	1.05571	2.06538	0	3.64517	1.28505	1.71702	1.16935	0.795858	1.33024	1.88273	3.16237	1.39643	5.20243	0.504349	1.6779	1.89231	6.98323	9.75014	12.3817	0	5.1279
4R79.1	nas-6	WBGene00003525	0	0	0	0	0	0	0	0.102904	0	0	0	0	0	0	0	0	0	0.317388	0	0	0	0	0	0	0	0	0	0	0	0	0	0	0	0	0	0	0	0	0	0	0	0	0	0	0	0	0
4R79.2	4R79.2	WBGene00007067	0	0	0	0	0	0	0	0	0	0	0	0	0	0	0	0	0	0	0	0	0	0	0	0	0	0	0	0	0	0	0	0	0	0	0	0	0.604075	0	1.16704	0	0	0	0	0	0	0	0
6R55.2	6R55.2	WBGene00007069	0	0	0	0	0	0	0	0	0	0	0	0	0	0	0	0	0	0	0	0	1.18386	0	0	0	0	0	0	0	0	0	0	0.733	0	0	0	0	0	0	0	0	0	0	0	0	0	0	0
AC3.1	sri-20	WBGene00005532	0	0	0	0	0	0	0	0	0.171365	1.92483	0.908481	0	0	3.51626	1.33321	0.74606	0.974521	1.13877	1.99814	6.5524	14.3005	7.68535	0	3.59993	1.51999	2.33716	1.28253	0	3.81568	0	2.70453	0	1.83166	2.47964	1.4516	0	2.92338	2.73897	36.411	12.5824	1.56137	1.47354	0	2.73708	0	2.07602	0
AC3.10	spe-10	WBGene00004964	0	0	0	0	0	0	0	0	0	0	0	0.359305	0	0	0	0	0	0	0	0	0	0	0	0	0	0	0	0	0	0	0	0	0	0	0	0	0	0	0	0.801719	0	0.319305	0	0	0	0	0
AC3.12	AC3.12	WBGene00077503	0	0	0	0	0	0	0	0	0	0	0	0	0	0	0	0	0	0	0	0	0	0	0	0	0	0	0	0	0	0	0	0	0.332891	0	0	0	0	0	0	0	0	0	0	0	0	0	0
AC3.2	ugt-49	WBGene00007070	0	0	0	0	0	0	0	1.10846	0	8.35132	14.7312	0	0	19.6904	6.84253	18.3753	3.70267	13.5864	13.54	11.7175	123.182	114.781	1.0926	0.557906	21.6314	18.8429	5.13143	2.06538	15.4109	12.3154	8.04227	3.52938	17.7959	16.0981	3.56215	7.83344	9.52557	7.74871	450.544	412.003	2.06304	9.90155	2.97116	34.0467	6.1901	2.07602	0
AC3.3	abu-1	WBGene00000024	0	0	0	0	0	0	0	0	0	0	0	0	0	0	0	0	0	0	0	0	0	0	0	0	0	0	0	0	0	0	0	0	0	0	0	0	0	0	0	0	0	0	0	0	0	0	0
AC3.4	pqn-2	WBGene00004098	0	0	0	0	0	0	0	0	0	0	0	0	0	0	0	0	0	0	0	0	0	0	0	0	0	0	0	0	0	0	0	0	0	0	0	0	0	0	0	0	0	0	0	0	0	0	0
AC3.5	AC3.5	WBGene00007071	0	0	0	0	0	0	0	0	0	0	0	0.376627	0	0	0	0	0	0.202301	0	0	0	0	0	0	0	0	0	0	0	0	0	0	0	0	0	0	0	0	0	0	0	0	0	0	0	0	0
AC3.6	col-151	WBGene00000724	0	0	0	0	0	0	0	0	0	0	0	0	0	0	0	0	0	0	0	0	0	0	0	0	0	0	0	0	0	0	0	0	0	0	0	0	0	0	0	1.60363	0	0	0	0	0	0	0
AC3.7	ugt-1	WBGene00007072	0	0	0	0	0	0	0	0	0	0	0	0	0	0	0	0	0	0	0	0	0	6.31787	0	0	0	0	0	0	1.75289	0	0	0	0	0	0	0	0.540871	0	42.7102	45.9308	0	0	0	0	0	0	0
AC3.8	ugt-2	WBGene00007073	0	0	0	0	0	0	0	0	0.182698	0	0	0	0	0	0	0	0	0	0	0	1.04583	0	0	0	0	0	0	0	0	0	0	0	0	0	0	0	0	0	0	0	0	0	0	0	0	0	0
AC7.1	tag-49	WBGene00006428	0	0	0	0	0	0	0	0	0	0	0	0	0	0	0	0	0	0	0	0	0	0	0.579929	0	0	0	0	0	0	0	0	0	0	0	0	0	0	0	0	0	0	0	0	0	0	0	0
AC7.2	soc-2	WBGene00004929	44.7053	33.5062	58.6115	11.2399	21.5741	27.9154	24.3341	2.0025	3.90226	9.9798	4.77	9.97843	8.13075	0.843547	0.745857	1.34197	2.12319	0.494398	1.42873	2.37623	2.88046	1.56792	5.7622	12.8472	0	1.0783	0.643177	2.14126	0	2.78115	2.37166	1.02312	1.03949	2.31903	1.57791	2.0906	5.5563	4.13549	2.99329	4.23432	2.00484	1.9461	6.75173	9.8814	0	0	0
AC7.3	AC7.3	WBGene00014997	0	0	0	0	0	0	0	0	0	0	0	0	0	0	0	0	0	0	0	0	0	0	0	0	0	0	0	0	0	0	0	0	0	0	0	0	0	0	0	0	0	0	0	0	0	0	0
AC8.10	AC8.10	WBGene00043988	0	0	0	0	0	0	0	0	0	0	0	0	0	0.787395	0	0	0.515653	0	0.445441	1.00531	0	0	0	0	0	0	0	0	0	0	0	0	0.332311	0	0	0	0.540871	0	0	0	0	0	0	0	0	0	2.28599
AC8.11	AC8.11	WBGene00043989	0	0	0	0	0	0	0	0	0	0	0	0	0	0	0	0	0	0	0	0	0	0	0	0	0	0	0	0	0	0	0	0	0	0	0	0	0	0	0	0	0	0	0.936157	0	0	0	0
AC8.12	AC8.12	WBGene00043990	0	0	0	0	0	0	0	0	0	0	0	0	0	0	0	0	0	0	0	0	0	0	0	0	0	0.419519	0	0	0	0	0	0	0.327975	0	0	0	0	0	0	0	0	0	0.337356	0	0	0	0
AC8.3	AC8.3	WBGene00007075	0	0	0	0	0	0	0	0	0	0	0	0	0	0.91434	0	0.792007	0.515653	0	0	0.502594	0	0	0	0	0	0	0	0	0	0	0	0	0	0	0	0	1.14495	0	0	0	0	0	0	0	0	0	2.28599
AC8.4	AC8.4	WBGene00007076	0	0	0	0	0	0	0	0	0	0	0	0	0	0	0	0	0	0	0	0	0	0	0	0	0	0	0	1.03784	0	0	0	0	0	0	0	0	0	0	0	0	0	0	0.936157	0	0	0	0
AC8.7	AC8.7	WBGene00007079	0	0	0	0	0	0	0	0	0	0	0	0	0	0	0	0	0	0	0	0	0	0	0	0	0	0.419519	0	0	0	0	0	0	0.327975	0	0	0	0	0	0	0	0	0	0	0	0	0	0
AH10.1	acs-10	WBGene00007082	0	0	0	0	0	0	0	0	0	0	0	0	0	4.30404	1.02334	3.57761	0	1.58095	0	0.864842	0	0.783866	0.496827	0	0	0.419519	0.543223	0.894763	0	1.53463	0	0.511496	0.279629	0.941422	0.583543	0.378748	0.357222	2.02884	0	0	0.685921	0	0	0	0	0	0
AH10.2	AH10.2	WBGene00007083	0	0	0	0	0	8.69371	0	0.431706	1.39757	30.92	45.5609	2.35589	0.642142	0	0.404826	0	0	0.804315	0	2.52858	1.83462	1.62032	1.51333	0	0	0	0	0	0	0	0	0	0	0	0	0	0.228094	0	2.29186	0	0	0	0	0	0	0	0
AH10.3	AH10.3	WBGene00007084	0	0	0	0	0	0	0	0.0831624	0.285472	0	0	0	0	0	0	0	0	0	0	0	0	0	0	0	0	0	0	0	0	0	0	0	0	0	0	0	0	0	0	0	0	0	0	0	0	0	0
AH10.4	AH10.4	WBGene00007085	0	0	0	0	0	3.05731	0	0	0	0	0	0	0	0	0	0	0	0	0	0	0	0	0	0	0	0	0	0	0	0	0	0	0	0	0.194083	0	0	0	0	0	0	0	0	0	0	0	0
AH6.1	gcy-1	WBGene00001528	0	0	0	0	0	0	0	0	0	0	0	0	0	0	0	0	0	0	0	0	0	0	0	0	0	0	0	0	0	0	0	0	0	0	0	0	0	0	0	0	0	0	0	0	0	0	0
AH6.10	sra-6	WBGene00005032	0	0	0	0	0	0	0	0	0	0	0	0	0	0	0	0	0	0	0	0	0	0	0	0	0	0	0	0	0	0	0	0	0	0	0	0	0	0	0	0	0	0	0	0	0	0	0
AH6.11	sra-7	WBGene00005033	0	0	0	0	0	0	0	0	0	0	0	0	0	0	0	0	0	0	0	0	0	0	0	0	0	0	0	0	0	0	0	0	0	0	0	0	0	0	0	0	0	0	0	0	0	0	0
AH6.12	sra-8	WBGene00005034	0	0	0	0	0	0	0	0	0	0	0	0	0	0	0	0	0	0	0	1.17145	0	0	0	0	0	0	0	0	0	0	0	0	0	0	0.347808	0	0	0	0	0	0	0	0	0	0	0	0
AH6.14	sra-9	WBGene00005035	0	0	0	0	0	0	0	0	0	0	0	0	0	0	0	0	0	0	0	0	0	0	0	0	0	0	0	0	0	0	0	0	0	0	0	0	0	0	0	0	0	0	0	0	0	0	0
AH6.17	AH6.17	WBGene00219290	0	0	0	0	0	0	0	0	0	0	0	0	0	0	0	0	0	0	0	0	0	0	0	0	0	0	0	0	0	0	0	0	0	0	0	0	0	0	0	0	0	0	0	0	0	0	0
AH6.2	sfxn-1.1	WBGene00007080	0	0	0	0	0	0	0	0	0	0	0	0	0	0	0	0	0	0	0	0	0	0	0	0	0	0	0	0	0	0	0	0	0	0	0	0	0	0	0	0	0	0	0	0	0	0	0
AH6.3	AH6.3	WBGene00007081	0	0	0	0	0	0	0	0	0	0.311639	0.291027	0	0	0	0	0	0	0	0	0	0	0	0	0	0	2.2949	0	0	0	0	0	0	0	0	0	0	0	0	0	0	0	0	0	0	0	0	0
AH6.4	sra-1	WBGene00005027	0	0	0	0	0	0	0	0	0	0	0	0	0	0	0	0	0	0	0	0	0	0	0	0	0	0	0	0	0	0	0	0	0	0	0	0	0	0	2.90336	1.60363	0	0	0	0	0	0	0
AH6.5	mex-6	WBGene00003231	819.161	679.01	841.727	808.374	790.913	733.858	856.202	282.417	310.083	477.345	412.882	677.14	473.578	35.5361	40.5822	29.7866	26.9276	45.5022	37.2411	70.8027	56.3666	77.3528	389.823	531.021	40.2337	27.0006	23.8666	15.1697	40.1644	14.9881	17.2506	13.4429	31.5872	26.0526	29.7886	21.906	30.0316	25.446	15.6266	66.5931	67.7204	64.0675	459.067	349.381	6.1901	5.7518	7.95248
AH6.6	sra-2	WBGene00005028	0	0	0	0	0	0	0	0	0	0	0	0	0	0	0	0	0	0	0	0	0	0	0	0	0	0	0	0	0	0	0	0	0	0	0	0	0	0	0	0	0	0	0	0	0	0	0
AH6.7	sra-3	WBGene00005029	0	0	0	0	0	0	0	0	0	0	0	0	0	0	0	0	0	0	0	0	0	0	0	0	0	0	0	0	0	0	0	0	0	0	0	0	0	0	0	0	0	0	0	0	0	0	0
AH6.8	sra-4	WBGene00005030	0	0	0	0	0	0	0	0	0	0	0	0	0	0	0	0	0	0	0	0	0	0	0	0	0	0	0	0	0	0	0	0	0	0	0	0	0	0	0	0	0	0	0	0	0	0	0
AH9.1	AH9.1	WBGene00014998	0	0	2.06191	0	0	0	0	0.136293	0	0	0.289588	0	0	0	0	0	0	0	0.245617	0	0	0.907762	0.470541	0	0	0	0	0	1.77902	0	0	0	0.327975	0	0	0	0.666786	0	4.66647	12.6866	0	0	0	1.04759	0	0	0
AH9.2	crn-4	WBGene00000797	10.1741	11.2429	7.10927	11.0753	21.2294	12.5378	4.4189	4.10463	6.68214	9.37593	6.74463	31.451	15.9195	0	2.88717	2.28431	4.67769	1.86778	3.26905	4.21334	5.7721	4.21993	11.7464	28.9653	2.93478	5.44595	2.5617	3.58036	1.35263	3.90903	1.5593	1.24106	2.64227	1.71023	1.5372	4.86786	4.15646	4.36224	3.0769	15.4722	11.9131	10.5472	32.4074	23.7012	0	0	0
AH9.3	AH9.3	WBGene00014999	22.0083	11.7594	22.2382	37.1574	18.2879	19.3548	15.573	34.4264	34.9277	27.3809	30.7923	29.6017	18.0854	46.7468	42.3059	28.8015	46.7242	46.026	49.1741	44.3499	34.5403	34.8527	40.5557	16.3232	53.1835	51.9273	48.4867	61.6335	50.6327	44.7138	49.602	60.5733	57.9373	59.5619	43.0956	47.3395	57.4511	68.3002	25.625	30.0265	38.2835	50.9648	28.8139	25.0716	76.6287	56.027	79.1099
AH9.4	AH9.4	WBGene00015000	0	0	0	0	0	0	0	0	0	0.271359	0	0.485098	0	0	0	0	0	0	0	0	0	0	0.817476	0	0	0	0	0	0	0	0	0	0	0	0	0	0	0	0	0	0	0	0	0	0	0	0
AH9.6	AH9.6	WBGene00044701	0	0	0	0	0	0	0	0	0	0	0	0	0	0	0	0	0	0	0	0	0	0	0	0	0	0	0	0	0	0	0	0	0	0	0	0	0	0	0	0	0	0	0	0	0	0	0
AH9.7	AH9.7	WBGene00175029	0	0	0	0	0	0	0	0	0	0	0	0.376627	0	0	0	0	0	0	0	0	1.83462	0	0	0	1.51999	3.23568	1.28651	2.07594	0	0	2.46059	1.02312	1.29859	1.63778	0.568734	1.78025	0	0	1.13811	1.99155	0.811831	0	0	0	0	0	0
B0001.1	lin-24	WBGene00003010	104.364	73.7991	87.7748	33.9389	45.0757	72.4561	146.196	41.2887	31.4239	28.1818	44.5229	116.843	237.988	19.5051	26.1589	25.9215	23.7603	17.6368	24.817	18.6652	9.57194	13.9265	18.2636	253.677	28.4845	24.5288	15.4536	18.706	26.1234	29.4986	22.7495	31.3114	12.0287	17.728	18.8037	6.73081	18.2786	15.5259	16.218	1.81054	22.1247	13.4772	85.4226	270.978	5.80703	5.7518	20.1402
B0001.2	B0001.2	WBGene00007087	48.9495	53.939	42.0255	11.4398	13.1208	55.7782	32.8782	3.13137	4.92832	13.0299	15.079	40.1444	77.1069	4.24743	10.1285	8.54478	7.08381	9.54283	13.7662	6.24853	6.83938	9.17394	9.76369	106.445	5.97514	9.74459	6.38808	9.38625	8.30028	5.75487	7.0507	7.20497	3.85337	7.72455	11.6169	8.57951	9.96671	8.91448	9.78425	6.33608	11.4794	6.38084	67.3375	69.5352	8.19806	14.5423	5.65278
B0001.3	B0001.3	WBGene00007088	13.9916	9.6951	5.04523	15.1413	21.7288	13.0814	8.8739	26.8026	22.3592	27.4669	21.3698	21.3445	26.1734	8.67928	10.6375	10.5781	12.2515	12.8347	7.58356	9.33622	9.32541	9.46943	13.7361	15.7376	10.7612	5.2505	6.57758	4.2931	5.87898	6.90663	7.40289	9.91262	7.61579	7.02398	2.7761	4.58926	8.60545	9.45092	5.93179	5.82121	9.99849	7.87615	19.3116	39.4501	12.3817	10.8656	19.2522
B0001.4	B0001.4	WBGene00007089	34.6428	37.0692	40.5205	115.043	164.433	130.569	119.557	120.017	110.214	137.492	140.184	141.721	214.05	66.562	59.6518	42.2352	45.104	46.8145	42.0849	57.8472	51.0827	52.3632	87.9195	241.716	66.0368	46.2201	46.1789	31.8235	75.2885	48.5652	64.041	55.8857	59.444	47.6668	54.9565	56.1685	61.0736	38.6781	42.4215	50.3384	49.5647	71.7387	149.424	276.932	70.217	73.4632	65.0514
B0001.5	B0001.5	WBGene00007090	24.4388	24.6199	25.2586	21.4159	28.1489	37.0308	27.7346	32.412	29.3877	37.047	29.972	31.8494	26.3463	43.0556	43.826	41.198	50.1103	39.1164	40.1102	39.4612	31.1305	27.016	40.1809	33.462	9.34608	17.1394	22.8283	18.3018	16.6032	36.4244	24.3268	19.8741	20.8025	25.8679	20.1666	17.0855	17.4502	21.76	8.33539	9.05711	22.3198	19.5417	27.5616	21.9894	0	4.15255	30.0037
B0001.6	B0001.6	WBGene00007091	52.2119	68.8946	36.3808	47.9514	62.6241	45.9707	52.9694	56.5324	57.7911	61.3212	81.8579	65.5929	50.6364	70.4044	91.6158	107.345	93.1912	70.4577	90.4591	60.2341	90.21	78.4852	62.1171	29.3856	71.0454	54.9139	80.9677	59.9276	53.3939	74.0206	102.09	67.2008	65.7955	69.3746	68.479	68.0635	77.1494	72.9109	71.4242	83.8297	124.492	119.578	161.532	35.5373	26.0036	65.6995	68.8673
B0001.7	B0001.7	WBGene00007092	20.3607	17.184	21.1161	59.566	31.6205	45.6922	34.6797	79.8074	92.5396	87.5735	82.3574	62.0837	40.5324	102.927	118.976	104.849	115.598	96.1484	107.418	112.307	65.1704	83.9307	93.669	55.308	67.8921	36.5717	35.2794	24.2243	28.3694	43.4739	46.2922	46.3429	48.818	36.8361	45.9754	48.6032	33.9196	11.8626	22.8448	18.683	38.3654	33.8385	56.9503	41.4595	8.19806	0	3.97575
B0001.8	B0001.8	WBGene00007093	50.9953	41.7457	35.0686	77.5535	84.3794	78.5222	51.446	108.45	100.574	95.3161	93.9739	86.7473	66.6682	64.2827	68.9585	76.5835	58.012	66.2529	64.7809	64.5641	38.8624	58.7609	91.5924	61.7278	47.6348	27.174	32.665	20.1977	41.3728	36.5347	23.6888	35.9823	31.6078	33.1694	25.2266	21.6377	24.6521	10.5715	20.4422	14.7235	32.0518	42.2946	63.7343	44.4657	12.3817	6.0753	15.7313
B0019.1	amx-2	WBGene00000138	0	0	0	0	0	0	0	0	0.247608	0	0.291027	0	0	0	0	0.595905	0	0.202301	0.445441	1.17145	2.09192	0	0	0	0	0	0	0	0	0	0	0	0	0	0	0	0	0	0.568984	3.00037	0.300779	0.791748	0	0	0	0	0
B0019.2	B0019.2	WBGene00007094	38.7279	26.0914	29.0977	18.1924	39.9004	53.2598	37.7266	13.6578	16.1411	25.798	22.985	24.6451	44.1134	6.7087	7.32159	5.75278	5.51365	5.50744	10.6387	10.7898	18.8843	21.2233	22.7816	63.2882	15.7597	9.11641	18.6444	13.8015	14.9401	14.1293	1.28505	8.1155	10.51	14.5057	5.63598	13.1811	16.365	17.1192	14.7787	24.1577	20.7889	18.2657	36.8946	36.3915	33.8235	26.2682	23.5826
B0024.1	col-149	WBGene00000722	0	0	0	0	0	0	0	0	0	0	0	0	0	0	0	0	0	0	0	0	0	0.783866	0	0	0	0	0	0	0	0	0	0	0	0	0	0	0	0	0	0	0	0	0	0	0	0	0
B0024.10	B0024.10	WBGene00007100	24.015	34.2821	56.7851	14.6766	26.7471	26.2578	43.1353	28.3314	25.3007	31.6628	45.6548	64.1209	66.9319	11.5935	9.45288	11.8089	9.38884	6.24153	7.75471	19.5415	9.04817	17.1895	38.2754	43.0265	3.04036	12.2951	7.5341	4.6079	6.66398	7.55703	5.12745	5.33458	9.26805	7.66154	2.65628	12.7402	14.2719	14.5614	14.8481	5.66856	13.8848	9.91897	47.6096	37.4182	48.7788	11.8271	18.1117
B0024.11	B0024.11	WBGene00007101	22.3995	17.9937	18.9934	7.61767	7.93286	33.5623	6.66148	22.1808	16.6978	33.4789	28.5516	30.4379	26.0942	17.4918	21.5911	18.7921	18.4832	16.8664	20.6241	24.7714	24.4395	32.6811	38.3959	23.0754	32.0849	19.6318	14.6602	6.8162	19.7782	16.6284	22.1007	15.3281	18.1542	15.4033	13.4195	14.9069	26.3653	29.8411	23.3724	21.8361	34.4477	30.5611	46.5461	30.4481	44.8014	57.3558	54.0496
B0024.12	gna-1	WBGene00001646	0.997811	3.90104	0	8.71791	6.72346	0.234108	0.945635	6.60452	4.53066	3.52547	2.64353	0.485098	0.786724	8.03489	3.81587	2.08821	8.40653	2.63243	2.8097	2.03845	2.10106	3.71762	3.13851	0	1.51999	10.3516	4.2759	6.82677	1.77902	4.12454	7.44976	5.92273	6.11513	5.06223	5.38605	4.12871	8.21893	6.84252	6.28149	7.49846	5.88083	7.3287	0	1.07069	20.1952	32.5084	32.6501
B0024.13	B0024.13	WBGene00007102	50.9953	15.8332	14.6043	12.2844	29.1674	30.262	53.088	10.2932	11.0113	6.55073	4.55193	42.2013	55.3626	0.91434	1.9422	1.53807	0.632987	2.00119	1.78907	0.864842	2.09192	0.783866	3.83389	57.3774	4.45478	0.419519	1.88499	0	4.4846	3.02119	5.30532	1.4593	3.66809	1.11795	1.19688	0	0.333352	0.405571	1.25712	1.00882	0.300779	0.736648	23.7107	51.5882	11.6155	6.0753	0
B0024.14	crm-1	WBGene00007103	1.99586	0	2.06191	0	0	0	0	2.44288	4.61592	2.15574	6.82617	4.66515	1.38121	7.45566	15.3674	9.38721	18.8192	15.8166	30.1539	10.6086	12.7039	13.9902	6.57539	1.41141	12.3879	17.3509	15.196	11.7972	8.04394	26.3839	23.9832	29.7654	28.4427	27.6782	56.8492	25.0576	7.55875	13.0173	3.95756	7.74023	8.25013	17.3089	6.79295	4.40164	23.9972	28.8895	32.1868
B0024.15	B0024.15	WBGene00007104	0	0	0	0	0	0	0	0	0	0	0	0	0	0	0	0	0	0	0	0	0	0	0	0	0	0	0	0	0	0	0	0	0	0	0	0	0	0	0	0	0	0	0	0	0	0	0
B0024.2	col-150	WBGene00000723	0	0	0	0	0	0	0	0	0	0	0	0	0	0.843547	0	0	0	0	0	0	0	0	0	0	0	0	0	0	0	0	0	0	0	0	0	0	0	0	0	0	0	0	0	0	0	0	0
B0024.3	B0024.3	WBGene00007096	0	0	0	0	0	0.234108	0	0.10173	0.247608	0.898781	0.302753	0	0.460292	0	0.404826	0	0.974551	0	0.426117	1.53573	0	0	0	0	0	0.764779	0	0	0	0	0	0.733	0	0	0.194083	0	0	0.931758	1.13133	1.82858	0	0.237794	0.772733	0	0	0	3.37995
B0024.4	B0024.4	WBGene00007097	0	0	0	0	0	0	0	0	0	0	0	0	0	0	0	0	0	0	0	0	0	0	0	0	0	0	0	0	0	0	0	0	0	0	0	0	0	0	0	0	0	0	0	0	0	0	0
B0024.6	gcy-6	WBGene00001533	0	0	0	0	0	0	0	0	0	0	0	0	0	0	0	0	0	0	0	0	0	0	0	0	2.93478	0	0	0	0	0	0	0	0	0	0	0	0	0	0	0	0	0	0	0	0	0	0
B0024.8	che-12	WBGene00000491	0	0	0	0	0	0	0	0.326081	0	1.30117	0.579247	0	0.379964	0	0	0	0	0	1.21145	1.0088	0	0	0.496827	0	3.04036	0	1.13925	0	0	0	0.90129	0	0.329675	0	0.441986	1.33206	1.82861	0	0	0.819757	0	0.945	1.88075	0	0	0	1.39494
B0024.9	trx-2	WBGene00007099	26.0226	22.262	39.2394	49.2634	32.4551	29.6341	23.9614	40.1174	33.9371	35.1855	40.3007	34.2842	26.4563	41.9286	43.9048	53.0645	47.1396	44.9601	41.238	50.0862	44.5095	42.2038	44.1351	20.5357	29.5695	41.3021	41.9231	58.8869	38.9889	62.0668	42.5903	46.5761	41.6296	41.3435	43.918	47.0113	44.5152	41.4527	44.8064	49.1373	43.8339	38.6942	34.2146	28.5724	69.5769	38.261	33.9948
B0025.1	vps-34	WBGene00006932	46.9042	56.7656	57.0171	10.5476	11.2176	46.9057	59.427	5.31628	5.77218	6.87458	8.06912	14.8283	18.4709	14.4095	23.7779	17.6631	15.5042	17.6157	17.5423	16.2111	12.31	15.1494	10.8644	14.7293	25.9816	35.2139	29.6475	39.8495	44.1902	48.2046	45.3459	35.6768	56.6181	56.2561	39.5145	52.4704	30.5786	57.8713	30.6815	24.6375	42.1108	33.446	32.0936	36.3809	109.141	97.8555	90.7286
B0025.2	csn-2	WBGene00000814	93.009	72.5516	78.8365	87.4783	67.4515	71.267	96.9303	73.803	78.1751	63.2633	72.188	61.7749	38.0847	86.8611	112.62	109.207	99.1947	96.5757	104.745	101.786	104.927	96.3119	86.7918	34.5483	161.841	151.163	168.099	130.974	133.133	130.848	135.891	131.495	133.833	136.022	119.094	139.02	130.149	122.139	120.816	85.2057	121.932	129.294	104.981	34.6564	149.59	150.651	92.8261
B0025.4	B0025.4	WBGene00015001	83.797	52.6362	46.5681	56.5261	65.7805	40.3957	16.2578	117.73	100.318	85.3972	81.9283	43.3735	21.1993	51.9495	69.2959	51.1803	52.1211	64.9865	47.6977	44.8761	32.5804	36.5748	47.235	16.4441	65.0501	47.5079	60.9363	46.6546	38.1166	33.6918	49.2651	43.2407	56.4073	49.1565	44.4644	36.2768	33.5129	43.9236	43.7742	55.7093	35.4027	34.0833	38.5461	11.3952	66.795	94.7149	77.5726
B0025.5	B0025.5	WBGene00194700	0	0	0	0	0	0	0	0.427812	0.123597	0	0.722642	0	0.262177	0.843547	0	0	0	0	0	1.0191	0	0	0	0	0	0	0	0.894763	0	0	0	0	0.329675	0.466789	0.347808	0.819649	0.357222	0	0.568984	0	0.300779	0	0	0	0	0	0
B0034.1	B0034.1	WBGene00015002	0	0	0	0	0	0	0	0	0	0	0	0	0	0	0	0.595905	1.54734	0	0	0	0	0	0	0	0	0	0	0	0	1.14071	1.8028	0	0	0	0	0	0.357222	0.405571	0	0	0	0.237794	0	0	0	0	2.28599
B0034.2	B0034.2	WBGene00015003	0	0	0	0	0	0	0	0	0	0	0	0	0	0	0	0	0	0	0	0	0	0	0	0	0	0	0	0	0	0	0	0	0	0	0	0	0	0	0	0	0	0	0	0	0	0	0
B0034.3	casy-1	WBGene00000403	13.7404	22.1097	21.6222	27.851	18.6819	16.6992	11.4585	41.6967	33.0422	39.6988	29.3112	31.562	29.1674	22.9244	33.216	33.5846	39.9643	28.935	39.6512	34.8713	36.8016	25.7865	26.9893	28.2619	42.8507	38.7382	41.9745	41.0938	49.6805	23.7995	23.5739	34.6804	38.8405	39.9899	31.105	34.2646	24.4612	29.8763	20.5874	45.7893	24.1144	24.0049	22.8965	32.2314	5.80703	7.35245	6.52284
B0034.4	B0034.4	WBGene00015004	0	0	0	0	0	0	0	0	0	0	0	0	0	0	0	0	0	0	0	0	0	0	0	0	0	0	0	0	0	0	0	0	0	0	0	0	0	0	0	0	0	0	0	0	0	0	0
B0034.5	B0034.5	WBGene00015005	0	0	0	0	0	0	0	0	0	0	0	0.792616	0	0	0	0	0.974551	0.209321	0.852339	0	0	0	0.579929	0	0	0	0	0	0	0	0	0	0	0	0	0	0	0.405571	0	0	0	0	0	0	0	0	0
B0034.7	B0034.7	WBGene00044394	0	0	1.81653	0	0	0	0	0	0.123789	0	0	0	0	0.970518	0.682146	0	0	0	0	0	0	0	0	0	0	0	0	0	0	0	0	0	0	0	0	0.460697	0.604075	0	0	0	0	0.574563	0	0	0	0	0
B0035.1	B0035.1	WBGene00007105	61.9376	73.7469	69.8957	137.72	123.715	118.016	125.201	242.159	240.379	223.398	239.791	182.017	187.738	202.617	202.517	204.194	227.962	195.012	231.164	242.34	146.977	214.545	246.497	151.228	208.394	235.139	189.496	205.223	213.748	204.267	232.795	241.137	231.492	222.509	206.467	241.944	225.163	144.301	180.655	147.741	203.622	246.375	272.587	167.825	149.766	122.738	117.262
B0035.10	his-45	WBGene00001919	1.99586	0	0	3.57597	1.20939	0.936776	1.89196	5.39531	6.19411	6.70218	8.23952	9.84446	12.3205	5.40159	6.69613	5.50708	4.30402	6.60722	7.83678	4.39083	12.317	7.81423	10.316	6.80198	9.24123	14.4726	6.67163	16.8564	12.852	6.03203	15.5126	8.6877	13.4477	11.4666	8.59852	8.4783	15.7813	25.3847	13.8469	4.604	9.7183	12.7904	7.90145	2.95266	5.80703	6.0753	3.97575
B0035.11	B0035.11	WBGene00007110	100.246	142.406	113.82	169.688	169.702	154.548	138.362	270.711	278.566	222.105	203.842	186.367	153.353	117.139	171.83	167.217	105.79	163.255	127.619	90.4977	65.3379	87.656	198.417	141.285	30.331	33.4619	47.2981	62.524	38.2786	41.3685	33.8741	35.2781	49.5318	39.4036	35.294	37.037	60.1879	41.7954	55.8516	62.822	90.4491	71.7248	175.741	123.618	97.1286	81.8965	82.8866
B0035.12	B0035.12	WBGene00007111	107.148	107.855	127.051	84.7462	81.5793	85.5402	118.514	29.7751	31.2539	38.7151	27.6952	103.455	124.825	6.77888	6.5559	2.8761	11.2112	9.34194	6.76098	7.63041	6.15675	17.8391	16.9398	114.931	2.93478	14.6216	19.2953	20.2933	9.34409	14.4786	13.1167	9.5909	13.8643	12.6054	15.7033	12.6269	11.6123	14.4303	15.6778	21.3601	4.41494	13.8792	73.1537	159.688	67.4072	36.301	12.7078
B0035.13	B0035.13	WBGene00007112	13.7404	20.228	12.5351	7.56397	10.8742	3.05731	5.14113	0	0	0	0.364358	0	0	0	1.17485	0.74606	0	0.202301	0	0	0	0	0	0	0	0	0	0	2.06279	1.34295	0	0	0.544902	1.83791	0.194083	0.971575	0.228094	0.405571	0	0	0.300779	0.574563	0	0.721584	0	0	0
B0035.14	dnj-1	WBGene00001019	96.4656	116.627	69.4246	53.5428	51.1609	47.0644	99.8102	10.3141	11.3502	11.8303	12.4358	29.5027	60.1747	11.6484	6.77936	13.2422	10.3365	8.6475	11.0469	9.40791	9.44298	6.14101	3.11627	69.4066	11.9525	26.3217	23.7016	36.0123	31.5295	12.9016	33.4996	28.6962	22.0875	29.2002	26.2104	28.582	24.3105	28.1409	22.2228	31.0853	18.005	21.2015	26.2566	84.3622	83.8541	85.7942	65.1953
B0035.15	B0035.15	WBGene00007113	57.1358	54.8567	63.0219	18.6557	23.9961	24.0685	47.6288	10.1261	13.6065	11.6318	12.6069	24.6847	43.9896	5.38696	1.87707	3.28045	3.41157	6.81381	6.11403	5.26051	1.04583	1.62032	9.38779	19.681	0	8.74743	5.34444	6.06437	4.45847	4.16191	5.16578	8.27287	4.70997	10.711	6.07787	9.15889	10.1377	7.91933	6.91486	8.03384	3.02788	1.94667	8.57515	24.4943	0	20.1363	14.7503
B0035.16	B0035.16	WBGene00007114	4.06816	0	1.68133	3.04821	2.0746	1.40551	11.5445	4.6637	7.87203	4.26205	8.00908	11.9663	5.11563	4.28976	4.63697	2.28431	0.632987	4.66756	5.76561	3.69188	1.96303	7.23415	5.28694	5.56965	4.89093	1.3215	3.65195	0	2.06279	0	1.28505	1.61845	3.66568	4.4894	1.34538	2.20007	2.84682	3.05779	2.99329	0.819757	3.90183	7.21355	10.7894	16.6016	6.1901	5.7518	0
B0035.18	B0035.18	WBGene00044290	16.2846	34.8734	38.2994	26.0399	18.8097	25.7088	24.277	34.2523	38.2864	42.1477	39.6973	35.026	22.7505	55.7868	27.5586	40.3605	39.5391	38.0852	35.8586	26.112	43.5716	29.4071	36.7498	19.9287	70.7186	54.6491	50.7245	42.4251	60.3061	51.2065	51.4929	49.612	45.2433	59.9296	50.0372	49.7692	56.6004	36.7966	53.1118	69.0451	73.0817	61.1014	51.7722	43.0588	42.4058	5.1133	33.3615
B0035.2	dnj-2	WBGene00001020	42.8151	31.9295	40.392	16.5836	35.5542	39.2882	58.3187	3.72838	3.36694	5.07733	6.94239	24.7284	44.2989	1.88486	1.9307	0.841967	0.974521	0.519689	1.58119	0	2.22969	5.35714	5.82908	41.5602	0	2.44347	0	3.85512	0	2.37365	0	1.63319	3.39843	2.90329	2.17002	0.593272	0.228094	4.08747	28.7014	13.5359	2.72319	2.37113	20.6624	12.3519	8.19806	7.18983	19.6045
B0035.3	B0035.3	WBGene00007106	59.1836	66.2455	54.7215	66.5252	79.4044	55.5149	79.6638	49.3646	62.3778	56.3668	59.5949	103.825	201.824	4.54291	5.02607	8.48436	7.3757	6.60944	4.88907	3.99454	11.2623	19.8961	23.1834	219.662	6.7427	2.85605	2.19305	2.14126	16.8233	2.18197	3.02967	5.31577	3.8259	7.30588	1.29569	5.09552	3.97268	2.44893	28.4227	17.3326	6.26706	5.36467	41.904	239.841	8.19806	0	6.47184
B0035.4	pfd-4	WBGene00007107	34.3761	27.7997	58.0593	56.2136	67.8612	64.8072	22.2464	74.7164	72.6832	93.0634	92.976	69.7399	48.1049	83.5976	70.4856	80.5778	51.0678	76.3121	52.4399	62.4788	54.0983	98.8733	105.043	39.4224	55.586	44.7908	48.6016	29.5689	34.3941	51.1726	54.2745	43.3844	39.1553	54.6002	41.897	34.9168	67.6551	34.3771	38.9761	35.7477	87.6066	67.1447	93.5365	34.6874	34.5869	42.2096	38.7438
B0035.5	gspd-1	WBGene00007108	26.4786	33.8673	43.6053	51.8353	39.4147	49.7915	48.569	33.3928	27.9306	48.953	60.3225	66.6491	81.3458	21.1521	28.8613	18.7637	27.6906	41.5172	26.6859	65.458	135.659	79.8086	95.5144	75.1953	41.1115	24.9653	19.0429	15.6022	15.3933	27.8853	25.538	21.2731	18.6658	19.7707	19.4338	22.3868	30.5147	15.3573	176.887	159.442	30.7432	38.754	57.4115	54.6766	6.1901	5.1133	10.1984
B0035.6	B0035.6	WBGene00007109	61.9376	55.7845	66.8763	222.561	201.85	181.144	168	219.712	211.468	200.69	198.18	226.136	177.975	175.737	190.263	155.635	202.368	192.191	196.513	186.009	227.662	188.402	286.646	201.606	209.685	118.101	136.724	104.922	165.849	176.564	140.335	162.965	142.733	152.506	183.241	159.629	133.295	94.4473	107.932	79.3098	193.975	197.11	259.859	167.718	28.7798	5.1133	14.2341
B0035.7	his-47	WBGene00001921	0	2.63152	1.80887	0.263717	3.28399	6.03376	0.630346	7.14527	9.87057	13.1396	11.4154	6.60027	7.50928	13.6786	9.07757	16.2869	9.44255	16.5237	9.68943	13.1072	6.02805	11.6311	12.667	5.73629	0	14.5242	13.9554	7.84424	7.96553	12.2822	18.8133	21.0086	20.0565	14.2773	19.8723	9.69183	10.5061	22.0326	17.2248	21.4764	17.9562	29.3409	18.8765	10.1607	11.6155	17.5803	26.309
B0035.8	his-48	WBGene00001922	2.99416	1.12418	3.63351	9.39838	12.1072	9.63405	10.4565	37.1392	33.1174	49.4879	60.8319	46.7251	30.2074	54.635	32.6435	35.5646	37.4346	38.612	38.2291	76.7608	70.6946	67.5732	78.045	16.9823	68.4385	47.4171	39.0779	39.5789	40.451	19.2927	50.6229	51.8483	39.0394	41.2511	44.6165	33.1172	68.8475	90.2975	33.1391	43.1952	60.28	66.7347	54.0127	26.7307	16.3981	29.3786	10.8371
B0035.9	his-46	WBGene00001920	0	1.26952	0	0	1.20939	0	0	3.50292	3.74475	8.08097	4.79753	2.35889	2.49811	5.59997	4.53397	4.66149	2.52189	5.87398	5.97917	3.85023	3.92655	2.82862	4.29587	2.05865	4.45478	3.79271	5.67695	5.2746	7.63229	2.94919	8.15075	3.38981	3.70982	4.70062	5.69053	3.80497	5.88888	11.0224	2.85448	2.4959	6.5762	11.1381	1.534	5.27905	22.2052	5.7518	13.663
B0041.1	B0041.1	WBGene00015006	0	0	0	0	0	0	0	0.0831624	0	0	1.01086	0	0	0.787395	1.68437	0.74606	0.515653	1.8583	0.671735	0.516505	1.04583	0.783866	0	0	0	2.15686	0	0	0	0	1.47037	0	0	0.448663	0	0	0	0.526187	0	0	0	0	0.674795	0	0	0	0
B0041.11	B0041.11	WBGene00206362	3.43383	5.15846	1.80887	2.52071	2.0746	0.234108	3.82249	2.60519	1.48552	3.53165	5.55519	3.26095	2.55951	12.1036	11.6158	15.4779	6.99544	10.5757	14.9045	12.0239	4.20263	6.65888	11.1814	4.54262	14.2386	3.5842	6.42035	2.00849	8.79314	6.61771	3.98959	1.61845	6.73638	4.10142	9.01503	8.93224	12.1724	4.61329	4.25086	3.78424	12.5222	11.1927	17.1811	0	0	14.9231	1.39494
B0041.2	ain-2	WBGene00015007	13.7404	16.9198	26.8684	9.7742	10.6988	9.47979	2.52323	16.7348	16.5994	22.8382	17.0949	9.11884	14.0697	34.1015	24.5868	37.2132	31.7462	23.517	24.1126	23.8577	14.6953	22.1027	13.5115	9.6668	25.7621	22.8953	16.3518	28.7591	18.7575	16.5264	27.9819	20.5169	18.925	23.3269	12.2112	24.995	22.9778	15.638	24.697	38.3922	17.6524	20.6967	14.8701	13.5442	28.7798	25.4304	28.4614
B0041.3	B0041.3	WBGene00015008	22.3995	13.9956	27.4506	21.1192	20.5188	9.71424	26.4705	21.3199	17.0774	10.2649	13.1546	12.2148	22.9068	9.9876	15.5556	11.1206	18.8332	24.6927	14.6669	4.53263	9.96649	7.20728	6.56958	24.2831	4.89093	8.93924	3.34704	3.04633	9.31881	5.9224	5.40169	3.48345	7.32444	8.45023	8.50804	5.4467	5.63069	1.33743	59.4952	30.7216	1.28755	5.10924	10.7895	23.6267	5.80703	3.67578	3.68093
B0041.4	rpl-4	WBGene00004415	26.4786	14.6162	25.7565	84.9832	90.1799	65.6083	43.4767	188.642	195.316	214.147	237.585	151.795	118.547	264.608	254.11	266.322	237.082	263.659	243.22	262.8	308.589	308.644	232.769	101.831	256.687	266.708	335.358	314.261	316.733	343.506	324.415	319.799	318.086	345.578	340.055	320.949	334.453	357.194	346.874	389.577	390.379	360.867	235.564	183.533	336.63	426.167	391.687
B0041.5	B0041.5	WBGene00015009	17.1775	23.6196	23.9059	26.7622	24.7103	27.7659	41.4308	34.5305	39.5863	40.3405	30.5779	55.9207	48.0467	15.1121	20.3306	16.9355	11.1083	16.9198	10.7409	6.48379	5.38707	12.7174	27.3243	43.6715	7.82572	7.06865	10.2653	9.50312	7.40115	9.86395	9.40593	7.5352	5.83477	7.03787	8.22585	7.90333	9.88734	3.72515	3.51368	1.17179	14.0694	5.38429	52.7694	40.612	28.3953	55.4921	6.81767
B0041.6	ptps-1	WBGene00015010	2.99416	0	7.13226	1.58327	6.72346	6.11537	9.90926	3.64541	4.92466	3.18511	6.08534	6.61273	3.25474	0.970518	3.81809	2.28431	0.515653	1.4218	1.36203	9.84705	9.18652	2.63319	7.25927	4.74924	1.51999	4.29687	10.0188	5.01596	8.67537	4.72717	8.61114	18.5325	4.80116	6.47344	4.11714	3.0587	7.73437	14.1715	14.7639	12.4483	4.09949	9.91771	3.78149	2.8403	0	19.4575	31.5251
B0041.7	xnp-1	WBGene00006961	49.1815	74.4327	90.5741	76.0765	71.6228	79.3512	94.0467	71.6046	76.9309	67.1025	65.1626	42.3151	41.4388	93.225	100.45	129.507	117.683	99.7739	100.081	111.154	69.5528	107.297	73.7258	78.4515	169.109	202.919	150.999	141.074	180.086	210.869	125.26	181.83	177.785	165.817	167.232	212.138	156.507	192.043	142.197	144.669	147.227	175.134	107.829	62.3427	508.671	318.956	452.047
B0041.8	B0041.8	WBGene00015011	287.9	290.211	315.033	276.945	285.552	256.852	257.652	281.216	276.998	268.546	281.444	272.842	286.268	130.38	104.784	132.05	90.8567	139.399	93.078	124.537	82.4669	132.046	189.948	234.528	56.3428	75.429	72.0077	86.4356	80.4753	76.4116	72.0208	61.3709	65.8201	72.1725	67.694	75.4383	82.9111	94.8114	76.3696	110.321	92.4629	92.3115	206.21	259.061	113.037	123.253	93.0437
B0047.1	bath-20	WBGene00015012	0	0	0	0	0	0	0	0	0	0	0	0	0	0	0	0	0	0	0	0	0	0	0	0	0	0	0	0	0	0	0	0	0.620231	0.234464	0.194083	0	0	0	0	0	2.82506	0	0	0	0	0	2.28599
B0047.2	btb-3	WBGene00015013	0	0	0	0	0	0	0	0	0	0.627422	0.257424	0	0	0	0	0	0	0	0	0	0	0	0	0	0	0.888768	0	0	0	0	0	0.610073	0	0	0	0	0	0	0	0	0	0.132087	0	0	0	0	0
B0047.3	bath-24	WBGene00015014	0	0	0	0.263717	0	2.50818	0.315135	0.465245	0.295056	0.966286	0.302753	0.39626	0	0.970518	0.533593	0	0	0.607051	0	1.17145	0	0.783866	0	0	0	1.0783	1.08658	0	0	2.18197	0	1.34307	0.557161	0.561394	1.45408	0.765302	0.357222	0	0	0	0.986701	2.12342	0.761264	1.1877	6.1901	0	0
B0047.4	math-1	WBGene00015015	0	0	0	0	0	0	0	0	0	0	0	0	0	0	0	0	0	0	0	0	0	0	0	0	0	0	0	0	0	0	0	0	0	0	0	0	0	0	0	0	0	0.472442	0	0	0	0	0
B0198.1	tsp-20	WBGene00006646	0	1.50734	1.80887	0.263717	0	3.05731	0	0.238023	0.247224	0.610223	0.804498	0.881358	0.262177	0.970518	0.341031	0	0	0	0.235491	1.17145	0	0	1.57405	0	0	0.764779	0	0	0	0	0	0	0	0.832572	0	0	0	0	0	0	0	0	0.674795	0.698306	0	0	0
B0198.2	B0198.2	WBGene00007115	0	0	0	0	0	0	0	0	0	0.311639	0	0	0	0	0.533593	0	0	0	0	0	2.09192	0	1.0926	0	0	0	0	0	0	0	0	0	0	0	0	0.819649	0.228094	0	0	0	0	2.29717	0	0	0	0	0
B0198.3	B0198.3	WBGene00007116	0	0	0	0	0	0	0	0	0	0.338864	0.291027	0	0	0	1.12095	0	0	0.285077	0.445441	0	0	0	0	0	0	0	0	0	0	0	0	0	0	0	0	0	0	0	0	0	0	0	0	0	0	0	0
B0205.1	B0205.1	WBGene00015017	53.0417	67.3968	75.3171	57.9288	49.5803	37.5802	80.1251	63.0265	58.72	50.587	48.5422	58.0705	32.5288	50.8968	67.7627	54.3307	56.7095	57.3707	51.371	49.0482	28.0828	40.8325	53.1239	48.0171	33.8137	48.5537	51.0261	50.6419	54.2091	48.4558	46.5233	41.9245	48.7664	42.7848	40.7936	50.4384	44.9749	47.4414	34.4747	75.7626	33.0682	50.0822	55.7637	49.4278	93.0469	58.3855	46.2959
B0205.10	B0205.10	WBGene00015024	0	0	0	0	0	0	0	0	0	0	0	0	0	0	0	0	0	0	0	0	0	0	0	0	0	0	0.543223	0	0	0	1.28505	0	0	0	0	0	0	0	0	0	0	0	0	0	0	0	0
B0205.11	mrpl-9	WBGene00015025	20.3607	15.5582	9.16954	6.34706	12.4276	13.8674	6.31736	18.906	17.4977	16.2576	15.3231	18.9675	18.7372	9.53946	17.4232	12.7557	12.2231	17.0933	14.6949	9.96622	11.4075	11.6644	11.5718	8.77254	20.3252	17.9218	18.9491	19.2327	29.092	18.5462	26.5366	16.3455	22.2158	26.9217	22.7118	24.3776	21.9692	24.9058	19.0939	11.1128	14.6579	11.2979	14.1583	18.6015	41.8115	43.6534	41.1952
B0205.12	B0205.12	WBGene00044413	42.8151	30.7664	51.6379	55.1329	75.5838	70.5778	42.165	24.3507	28.5474	21.6095	30.6173	40.3377	32.366	23.9532	24.3774	12.5188	15.6641	15.3202	17.5956	37.5201	19.9499	23.1532	43.0419	39.1612	11.3038	7.52363	8.60698	10.273	7.16537	4.16191	5.21601	8.20739	9.11209	8.89741	12.0716	11.7487	19.4623	9.40803	10.8318	5.43369	16.4691	16.0415	45.761	25.2993	40.3953	19.2956	36.8957
B0205.13	B0205.13	WBGene00044644	0	0	0	0	0	0	0	0	0.192642	0	0	0	0	0	0	0	0	0.368254	0	0.864842	0	0	0	0	0	0	0.639352	0	0	0	0.90129	0.910325	0	0.466789	0	0	0	0	0	0	0.811831	0	0	0	0	0	0
B0205.14	B0205.14	WBGene00044646	0	0	0	0	0	0	0	0.349843	0.249654	0	0	0	0	0	0	0.792007	0	0	0	0.864842	0	0	0	0	0	0	0	0	0	0	0	0	0	0	0.413695	0	0	0	0	0	2.13881	2.76961	0	0	0	0	0
B0205.2	srz-85	WBGene00015018	0	0	0	0	0	0	0	0	0	0	0	0	0	0	0	0	0	0	0	0	0	0	0	0	0	0	0	0	0	0	0	0	0	0	0	0	0	0	0	0	0	0	0	0	0	0	0
B0205.3	rpn-10	WBGene00004466	160.149	118.684	141.049	268.124	201.088	207.168	270.999	401.449	362.298	330.743	344.297	308.856	222.109	304.508	335.445	288.891	315.105	338.758	330.436	232.281	169.232	239.539	358.672	279.326	97.3663	112.039	90.2107	70.9402	79.7075	121.577	117.091	85.2328	136.899	123.018	124.291	127.794	115.879	65.6537	65.1398	120.169	138.873	136.929	224.465	167.814	75.8738	55.8131	74.2167
B0205.4	B0205.4	WBGene00015019	0	0	0	0	0	0	0	0	0	0	0	0	0	0	0	0	0	0	0	0	0	0	0	0	0	0	0	0	0	0	0	0	0.559326	0	0	0	0	0	0	0	0	0	0	0	0	0	0
B0205.5	B0205.5	WBGene00015020	0	0	0	0	0	0	0	0	0.208403	0	0	0	0	0	0.341031	0	0	0	0	0	0	0	0.28603	0	0	0.764779	0	0.894763	0	1.14071	0	0	0	0	0	0	0	0	0	0	0	0	0.626765	0	0	0	0
B0205.6	B0205.6	WBGene00015021	23.0115	42.9627	34.4181	18.214	30.6904	25.4832	27.5278	5.48887	6.09707	3.73687	7.17639	7.11586	4.48281	2.79942	1.9587	2.08821	4.0725	4.17049	4.63832	4.91545	2.88046	1.81574	3.09534	2.64992	6.41129	1.74112	4.47711	0.894763	1.75289	7.24482	3.8424	6.4964	4.92441	2.99204	3.1326	2.63646	5.76909	2.79319	2.94456	2.83789	5.22068	4.24967	9.90871	5.38307	22.5882	18.4369	3.97575
B0205.7	kin-3	WBGene00002191	158.076	199.744	216.007	220.336	182.573	220.655	265.354	298.706	297.974	258.489	303.441	218.412	214.626	372.936	406.007	344.622	423.223	401.999	411.766	416.399	512.161	456.067	420.785	246.473	567.637	537.565	559.01	468.722	512.046	454.516	530.902	493.18	492.416	466.099	569.165	557.481	548.191	467.783	415.821	508.238	563.684	617.029	380.596	393.288	458.545	348.928	344.007
B0205.8	B0205.8	WBGene00015022	45.1444	49.1494	29.3761	57.1871	41.1116	37.7146	31.6088	88.761	89.1228	90.9695	80.9693	60.8409	51.002	98.4216	97.0876	109.609	113.737	105.163	90.7962	56.1559	54.1731	63.536	75.6994	51.5855	70.2856	52.9544	44.2769	41.796	38.8833	54.1657	53.7239	57.8445	57.2057	51.8029	47.5907	43.1162	53.6971	51.2838	37.0563	27.6002	38.4233	36.17	42.9418	31.1797	44.1983	53.0346	58.6339
B0205.9	B0205.9	WBGene00015023	55.0421	74.8069	59.8151	60.4691	43.0819	60.6879	58.3809	49.5601	43.4163	40.0591	43.195	56.9984	31.0945	27.8768	24.1385	29.2723	38.6941	17.7918	21.8668	24.761	12.7228	21.5067	55.1802	39.1809	28.175	36.2109	32.6085	40.1067	38.4181	34.2235	29.9905	36.9266	36.5651	27.0018	32.839	32.6012	22.4323	27.3096	27.6183	20.9981	24.9535	31.9957	31.5558	27.9474	26.0036	28.567	33.435
B0207.1	B0207.1	WBGene00015026	0	0	0	0	0	0	0	0.136293	0	0	0	0	0	0	0	0	0	0	0	0	0	0	0	0	0	0	0	0	0	0	0	0	0	0	0	0	0	0	0	0	0	0	0	0	0	0	0
B0207.10	B0207.10	WBGene00015033	0	0	0	0	0	0	0	0	0	0	0	0	0	0	0	0	0	0	0	0	0	0	0	0	0	0	0	0	0	0	0	0	0	0	0	0	0	0	0	0	0	0	0	0	0	0	0
B0207.11	B0207.11	WBGene00015034	0	0	0	0	0	0	0	0	0	0	0	0	0	0	0	0	0	0	0	0	0	0	0	0	0	0	0	0	0	0	0	0	0	0	0	0	0	0	0	0	0	0	0	0	0	0	0
B0207.12	avr-14	WBGene00000232	0	0	0	0	0	5.56549	0	0.67451	0.123597	0.338864	0	0.735932	0	0	0	0	0	0.209321	0.491991	0	0	0.907762	0.496827	0	0	1.49782	11.7321	59.0397	3.13164	9.87055	4.40403	6.04381	1.16689	0.380654	0.568734	0.782161	0	0	0	0	0	1.35224	0.936157	0.694262	0	6.22959	3.08471
B0207.2	B0207.2	WBGene00015027	0	0	0	0	0	0	0	0	0	0	0	0	0.642142	0	0	0	0	0	0.235491	0	0	0	0	0	0	0	0	0	0	0	0	0	0	0	0	0	0	0	0	0	0	0.132087	0	0	0	0	0
B0207.3	gpa-14	WBGene00001676	0	0	0	0	0	0	0	0.492258	0.192642	1.35479	1.23463	0.39626	1.27099	0.843547	0.341031	0	0	0.317388	0.991026	1.17145	0	0	0	0	0	1.65355	1.59702	0	0	0	1.47037	0	0.517766	0.365783	0	0.476979	0	0	0	0	0	0.626385	0.772733	0	0	0	0
B0207.4	air-2	WBGene00000099	120.854	149.178	126.203	129.479	149.608	165.441	156.558	112.474	115.733	95.1072	117.235	91.7834	69.6494	164.03	148.35	160.55	170.97	149.284	153.709	145.123	126.342	128.865	145.85	68.6008	169.122	160.557	149.447	139.522	201.252	148.627	193.189	155.598	156.308	162.167	132.119	138.12	144.01	133.272	83.091	99.4355	110.226	95.2449	104.911	91.6303	150.337	189.155	193.48
B0207.5	B0207.5	WBGene00015028	0	1.12418	5.55977	0	0	0.234108	0	0.683604	0	2.70991	2.06726	0.376627	0	0	1.6199	5.7536	2.43651	1.33833	0.445441	12.8628	3.41384	17.1079	0.941198	0	5.87029	0	0	0	1.77902	2.51768	0	0.610073	1.83148	0.365783	2.06456	0.609283	0.666786	3.68601	3.37611	5.55462	3.70018	3.02686	1.25368	0	0	3.67578	0
B0207.6	B0207.6	WBGene00015029	66.3837	21.0609	63.3752	77.2996	85.13	31.8173	50.7994	33.8392	32.5525	28.8042	20.4989	38.6726	59.8499	7.03291	5.35542	10.0328	5.16158	20.2753	9.51551	9.63661	4.59828	11.3006	12.0023	59.132	20.436	20.5463	13.9903	26.8759	10.7508	24.9405	20.4731	22.8317	20.4985	13.0446	15.702	20.1863	13.7535	20.1233	16.5622	15.172	5.40176	14.238	16.525	58.4853	0	33.1601	26.5565
B0207.7	B0207.7	WBGene00015030	0	0	0	0	0	0	0	0	0	0	0	0	0	0	0	0	0	0	0	0	0	0	0	0	0	0	0	0	0	0	0	0	0	0	0	0	0	0	0	0	0	0	0	0	0	0	0
B0207.8	B0207.8	WBGene00015031	0	0	0	0	0	0	0	0	0	0	0	0	0	0	0	0	0	0	0	0	0	0	0	0	0	0	0	0	0	0	0	0	0	0	0	0	0	0	0	0	0	0	0	0	0	0	0
B0207.9	B0207.9	WBGene00015032	0	0	0	0	0	0	0	0	0	0	0	0	0	0	0	0	0	0	0	0	0	0	0	0	0	0	0	0	0	0	0	0	0	0	0	0	0	0	0	0	0	0	0	0	0	0	0
B0212.1	otpl-1	WBGene00015035	0	0	0	0	0	0	0	0	0.235956	0	0	0.376627	0	2.53126	0.745857	1.53807	0	0	1.14968	0	0	0	0	0.557906	0	0.888768	0	0	1.75289	0.839022	0	0	0.879083	1.51133	1.19688	1.71342	0.333352	1.39643	1.16704	0.504349	2.3734	0.838769	0.936157	0	0	0	0
B0212.2	sre-5	WBGene00015036	0	0	0	0	0	0	0	0	0	0.311639	0	0	0	0	0	0	0	0	0	0	0	0	0	0	0	0	0	0	0	0	0	0	0	0.448663	0	0	0	0	0.568984	0	0	0	0	0.593779	0	0	0
B0212.3	B0212.3	WBGene00015037	10.304	3.37338	2.06191	15.3367	16.5794	12.9278	12.4088	28.4579	25.9496	19.8789	31.0507	23.5314	18.9064	32.9419	42.9914	41.8	30.9825	27.3137	37.8445	22.8724	19.4073	27.9918	32.9387	18.3878	26.5255	44.9227	30.3048	38.449	30.0197	33.4897	19.8112	28.3783	33.6575	39.5726	35.4612	25.0654	25.1286	45.4825	26.5344	33.0998	30.3034	37.5436	21.6112	14.5312	66.0313	63.2472	48.2324
B0212.4	nstp-6	WBGene00015038	0	0	0	0	0	0	0	0.478451	1.14418	1.21042	1.84956	1.15192	0.504344	0.787395	0.80975	0.74606	0.487201	1.10588	0.2565	0	1.04583	0	0	0	0	0	0	1.11373	0	0	0	0	0.615065	0.780065	1.07476	1.65907	0.528165	0	2.54349	1.30607	0	0	0.337356	3.10955	0	0	0
B0212.5	osm-9	WBGene00003889	0	0	0	0	0	0	0	0	0	0	0	0	0	0	0	0	0	0	0	0	0	0	0	0	0	0	0	1.03784	2.06279	0	0	0	0.258851	0	0	0.695637	0.540871	2.3334	0	0	0	0	0	0	0	0	0
B0212.6	B0212.6	WBGene00044111	0	0	0	0	0	0	0	0	0	0	0	0	0	0	0	0	0.974551	0	0	0	0	0	0	0	0	0	0	0	0	0	0	0	1.23028	0	0	0	0	0	0	0	0	0	0	0	0	0	0
B0213.10	cyp-34A5	WBGene00015040	0	0	0	0	0	0	0	0	0	0	0.257424	0	0	0	0	0	0	0	0	0	0	0	0	0	0	0	0	0	0	0	0	0	0	0	0	0	0	0	0	0	0	0	0	0	0	0	0
B0213.11	cyp-34A6	WBGene00015041	0	0	0	0	1.20939	0	0	0	0	0	0	0	0	0	0	0	0	0	0	2.34318	0	0	0	0	0	0	0	1.03784	0	0	0	0	0	0	0	0	0	0	0	0	0	0	0.337356	0.593779	0	0	0
B0213.12	cyp-34A7	WBGene00015042	0	0	0	0	0	0	0	0	0	0	0	0	0	0	0	0	0	0	0	0	0	0	0	0	0	0	0	0	0	0	0	0	0	0	0	0	0	0	0	0	0	0	0	0	0	0	0
B0213.14	cyp-34A8	WBGene00015043	0	0	0	0	0	0	0	0	0	0	0	0	0	0	0	0	0	0	0	0	0	0	0	0	0	0	0	0	0	0	0	0	0	0	0	0	0	0	0	0	0	0	0	0.593779	0	0	0
B0213.15	cyp-34A9	WBGene00015044	0	0	0	0	0	0	0	0	0	0	0	0	0	0	0	0	0	0	0.245617	0	0	0.783866	0	0	0	0	0	0	0	0	0	0	0	0	0.413695	0	0	0	4.19013	1.17179	0	0	0	0	0	0	0
B0213.16	cyp-34A10	WBGene00015045	0	0	0	0	0	0	0	0	0	0	0	0	0	0	0	0	0	0	0	0	0	0	0	0	0	0	0	0	0	0	0	0	0	0	0	0	0	0	0.568984	0	0	0	0	0	0	0	0
B0213.17	nlp-34	WBGene00015046	0	0	0	0	0	0	0	0	0	0	0	0	0	0	0	0	0	0	0	1.17145	5.12028	14.8584	0	0	0	0	0	0	0	0	0	0	0.664703	0.234464	0	1.8408	0.540871	0	25.8618	31.3706	1.37712	0.319305	1.11009	1.7464	0	0	0
B0213.2	nlp-27	WBGene00003765	0	0	0	0	0	0	0	0.349843	0	0.271359	0	0	0	0	0	0	0	0	0	0	0	0	0	0	0	0	0	0	0	0	0	0	0	0	0	0	0	0	0	0.504349	0	0	0	0	0	0	0
B0213.3	nlp-28	WBGene00003766	0	0	0	0	0	0	0	0	0	0	0	0	0	0	0	0	0	0	0	0	0.9172	0	0	0	0	0	0	0	0	0	0	0	0	0	0	0	0	0	0	0	0	0	0	0	0	0	0
B0213.4	nlp-29	WBGene00003767	0	0	0	0	0	0	0	0	0	0	0	0	0	0	0	0	0	0	0	0	7.34388	3.18824	0.408688	0	0	0	0	0	0	0	0	0	0	0	0	0	0	0	0	1.00882	0	0	0	0.34911	0	0	0
B0213.5	nlp-30	WBGene00003768	0	0	0	0	0	0	0	0	0	0	0	0	0	0	0.341031	0	0	0	0	0	8.00208	5.61383	0	0	0	0	0	0	0	0	0	0	0.332891	0	0	0.460697	0	0	10.2368	9.65541	0	0	0	4.5451	6.1901	0	0
B0213.6	nlp-31	WBGene00003769	0.997811	0	0	0	0	0	0	0	0	0	0	0	0	2.79942	0	0	0	0.570224	0	0	110.007	100.641	0.496827	1.88563	0	1.98028	5.00326	1.9223	3.55847	10.2639	4.64715	3.8575	4.09745	2.40063	6.10647	11.9943	4.93158	5.7838	560.364	609.802	3.01823	2.83783	1.09862	59.0757	0	4.53332	9.68672
B0213.7	str-83	WBGene00006142	0	0	0	0	0	0	0	0	0	0	0	0	0	0	0	0	0	0	0	0	0	0	0	0	0	0	0	0	0	0	0	0	0	0	0	0	0	0	0	0	0	0	0	0	0	0	0
B0213.8	str-82	WBGene00006141	0	0	0	0	0	0	0	0	0	0	0	0	0	0	0	0	0	0	0	0	0	0	0	0	0	0	0	0	0	0	0	0	0	0	0	0	0	0	0	0	0	0	0	0	0	0	0
B0213.9	str-247	WBGene00006274	0	0	0	0	0	0	0	0	0	0	0	0	0	0	0	0	0	0	0	0	0	0	0	0	0	0	0	0	0	0	0	0	0	0	0	0	0	0	0	0	0	0	0	0	0	0	0
B0218.1	faah-1	WBGene00015047	0	0	0	1.58327	0	3.21068	0.630346	8.9924	8.00147	3.48721	5.67129	3.72018	4.35556	11.2113	11.242	7.99206	15.0297	16.9562	10.3928	11.2683	6.29455	9.66681	3.907	4.83823	3.04036	18.2436	13.7176	5.99663	27.4255	19.6458	17.3904	13.1947	22.2313	18.3936	9.96709	12.9552	9.24025	11.8747	2.87441	16.0128	11.4915	8.56575	4.36257	6.3043	0	18.1399	9.6356
B0218.2	faah-2	WBGene00015048	0.997811	0	1.68133	0.263717	0	0.468274	0.315135	0.836056	0.362012	2.4807	1.90178	2.26263	2.45393	0	0.992181	0	0.515653	0	0.628859	1.17145	2.10106	0	2.81428	1.41141	0	1.74112	0.643177	2.14126	0	1.90793	0.90129	1.83995	1.50954	2.15181	1.48542	1.21161	1.06904	2.5316	1.82625	1.51342	0.766797	4.79591	2.41181	0.593779	0	3.03728	4.55882
B0218.3	pmk-1	WBGene00004055	6.10298	5.01312	1.68133	0	12.0836	11.3664	4.13763	1.57304	1.70099	1.43763	2.29819	3.4179	3.07624	0.843547	0	1.53807	2.12319	0.8095	0.245617	0	4.33104	0.783866	5.11705	0.853508	3.37094	4.53035	1.82575	2.05532	7.09124	2.22943	3.3621	2.33237	4.66324	4.75678	2.7203	2.75764	5.91774	10.9999	16.3484	7.93266	5.42408	7.17702	3.6259	3.78492	54.4073	23.175	29.2035
B0218.5	B0218.5	WBGene00015049	0	0	0	0	0	0	0	0	0	0	0	0	0	0	0	0	0	0	0	0	0	0	0	0	0	0	0	0	0	0	0	0	0	0	0	0	0	0	0	0	0	0	0	0	0	0	0
B0218.6	clec-51	WBGene00015050	0	0	0	0	0	0	5.14113	0	0	0	0	0	0	0	0	0	0	0	0	0	1.04583	0	0	0	0	0	0	0	0	0	0	0	0	0	0	0.819649	0	0	0	2.34387	0.300779	0.574563	0	0	0	0	0
B0218.7	B0218.7	WBGene00015051	0	0	0	0	0	0	0	0	0	0	0	0	0	0	0.587355	0	0	0	0.2565	0	0	0.907762	0	0	0	0	0	0	0	0	0	0	0	0	0	0	0	0	0	0	0	0	0	0	0	0	0
B0218.8	clec-52	WBGene00015052	0	0	0	0	0	0	0	0	0.337159	0	0	0	0	0	0	0	0.632987	0	0	1.00531	0	1.79674	0.993775	0	0	0	0	0	0	0	0	0	0	1.34632	0.568734	0	0	1.0525	1.16704	1.67614	0.601632	0.574563	0	0	0	0	0
B0222.1	B0222.1	WBGene00015053	0	0	0	0	0	0	0	0	0	0	0	0	0	0	0	0	0	0	0	0	0	0	0	0	0	0.419519	0.543223	0	0	0	0	1.10695	12.1783	1.15479	2.01815	0	0	0	0	0	4.25682	0	0	2.73708	0	0	0
B0222.10	B0222.10	WBGene00015058	0	0	0	0	0	3.05731	0	0	0.399934	0	0.689038	0	0	0	0	0	0	0	0	0	1.83462	0	0.941198	0	0	0	0	0	0	0	0	0	0.365595	0	0	0	0	1.06288	0	0.504349	0	0.557099	0	0	0	0	0
B0222.11	B0222.11	WBGene00044582	0	0	0	0	0	0	0	0	0	0	0	0	0	0	0	0	0	0	0	0	0	0	0	0	0	0	0	0	0	0	0	0	0	0	0	0	0	0	0	0	0	0	0	0	0	0	0
B0222.2	B0222.2	WBGene00015054	0	0	0	0	0	0	0	0	0	0	0	0	0	0	0	0	0	0	0	0	0	0	0	0	0	0	0	0	0	0	0	0	0.332311	0	0	0	0	0	0	0	0	0	0	0	0	0	0
B0222.3	B0222.3	WBGene00015055	0	0	0	0	0	0	0	0	0	0	0	0	0	0	0	0	0	0	0	0	0	0.783866	0	0	0	0	0	0	0	0	0	0	0.329675	0	0	0	0	0	0	0	0	0	0	0.698306	0	0	0
B0222.4	tag-38	WBGene00006418	0	0	0	0	0	0	0	0	0	0	0	0	0	0	0	0	0	0	0	0	0	0	0	0	0	0	0	0	0	0	0	0	0	0	0	0	0	0	0	0	0	0	0	0	0	0	0
B0222.5	B0222.5	WBGene00015056	0	0	0	0	0	0	0	1.03293	0	0.627422	0	0	0	0	0	1.19196	0	0	0.295398	0	0	0	0.408688	0	0	0	0	0	1.75289	0	0	0.511496	0	0	0	0	0	0.990855	4.04174	1.67614	0.685921	1.39639	0.337356	0	8.19806	0	0
B0222.6	col-144	WBGene00000717	0	0	0	0	0	0	0	0	0	0	0	0	0	0	0	0	0	0	0.295398	0	1.96303	1.01287	0	0	0	0	0	0	0	0	0	0	0.894694	0	0	0	0	0	0.68814	1.00882	0	0	0	0	0	0	0
B0222.7	col-145	WBGene00000718	0	0	0	0	0	0	0	0	0	0	0	0	0	0	0	0	0	0	0	0	1.83462	0	0	0	0	0	0	0	0	0	0	0	0	0	0	0	0	0	0	0	0	0	0	0	0	0	1.39494
B0222.8	col-10	WBGene00000599	0	0	0	0	0	0	0	0	0	0	0	0	0	0	0	0	0	0	0.590868	0	1.96303	1.01287	0	0	0	0	0	0	0	0	0	0	0	0	0	0	0	0	0.68814	0.504349	0	0	0	0.34911	0	0	0
B0222.9	gad-3	WBGene00015057	0	0	0	0	0	0	0	0.357375	0.429921	0	0	0	0	0.970518	1.21477	0	0	0	0.295398	0.502594	31.6104	20.0658	0	0	3.37094	0	0.643177	0	0	1.14071	3.60648	0.733	0.321055	0	0.85362	0	0.228094	0	103.283	83.5522	0	0	0	8.25372	0	0	0
B0228.1	B0228.1	WBGene00015059	0	0	0	0	0	0	0	0.16076	0	0	0	0	0	0	0	0	0	0	0	0	0	0	0	0	0	0	0	0	0	0	0	0	0	0	0	0	0	0	0	0	0.685921	0	0	0.34911	0	0	0
B0228.4	cpna-2	WBGene00015061	0	0	1.68133	0	0	0	0	0.143794	0	0	0	0	0	0	0	0	0	0	0.383242	1.17145	1.18386	0	0	0	0	0	0	0.894763	1.35263	0	0	0	0.948207	0	0.247903	0.443315	1.91968	0	1.13811	1.51342	0	0	0	0.34911	0	0	0
B0228.5	trx-1	WBGene00015062	0	0	0	0	0	0	0	0.272618	0	0	0	0.39626	0	0.787395	0	0	0	0	0	0	1.04583	0	0	0	0	0	0	0	0	0	0	0	0	0	0	0	0	0	1.70737	0.801719	0	0.736648	0	0	0	0	0
B0228.6	B0228.6	WBGene00015063	0	0	0	0	0	0	0	0	0	0	0	0	0	0	0	0	0	0	0	0	0	0	0	0	0	0	0	0	0	0	0	0	0	0	0	0	0	0	0	0	0	0	0.772733	0	0	0	0
B0228.7	B0228.7	WBGene00015064	2.03383	3.90104	5.43471	8.57469	2.0746	13.8664	6.97731	14.0804	11.3922	13.1919	16.8163	9.29844	7.146	9.26985	12.8502	8.39725	10.6421	15.217	10.6726	20.8894	15.3378	21.2964	12.9302	0.557906	17.719	17.273	11.0875	7.19712	18.6413	8.31429	12.7622	9.18025	9.38454	12.8528	10.8086	10.4972	18.5138	15.6604	45.3868	40.4612	11.5555	12.6238	14.2714	12.3291	6.1901	5.1133	5.95377
B0228.8	B0228.8	WBGene00015065	0	0	0	0	0	0	0	0	0	0	0	0	0	0	0	0	0	0	0	0	0	0	0	0	0	0	0	0	0	0	0	0	0	0	0	0	0	0	0	0	0	0	0	0	0	0	0
B0228.9	B0228.9	WBGene00015066	0	0	0	0	0	0	0	0	0	0	0	0	0	0	0	0	0	0	0	0	0	0	0	0	0	0	0	0	0	0	0	0	0	0	0	0	0	0	0	0	0	0	0	0	0	0	0
B0238.1	B0238.1	WBGene00015067	0	0	0	0	1.20939	0	3.82249	1.40078	0.489229	0.271359	2.00709	1.27771	0.72247	0	2.68814	0	4.93097	2.01278	2.00801	3.40394	3.14689	4.39654	0.579929	0	3.04036	2.3998	3.5784	8.80574	0	6.10509	4.94209	11.905	0.78006	4.1694	2.37123	4.85367	5.19488	8.26695	2.81917	9.10224	1.996	12.6463	18.2461	0.34911	0	0	4.57253
B0238.10	B0238.10	WBGene00015074	48.1501	38.1453	41.6463	48.145	43.3418	50.5261	35.4332	22.8466	18.0857	28.272	21.4522	50.1336	50.8229	4.3744	5.62907	3.43068	1.26613	2.1892	5.39267	2.04219	9.84873	5.42912	10.9559	58.7238	2.93478	3.46944	8.13101	3.71248	3.10551	6.24771	6.39215	6.2266	3.67641	4.07789	4.69109	6.63499	3.57194	6.4498	15.8281	28.7571	5.81536	8.54789	42.2139	43.7032	0	20.4122	14.1667
B0238.11	B0238.11	WBGene00015075	207.966	204.396	204.4	202.805	231.644	222.587	181.45	222.2	223.312	241.798	245.804	228.126	155.187	209.086	217.804	221.405	233.007	256.271	241.674	293.29	333.477	302.805	245.084	135.056	237.46	347.489	315.507	319.146	289.208	296.221	324.15	308.146	300.631	343.792	323.607	299.789	334.011	346.177	270.547	280.954	355.382	346.477	276.722	147.796	301.086	382.632	311.911
B0238.12	B0238.12	WBGene00015076	0	0	0	0	0	0	0	0	0	0	0	0	0	0	0	0	0	0	0	1.17145	0	0	0	0	0	0	0	0	0	0	1.28505	0	0	0	0	0	0	0	0	0	0	0	0	0	0	0	0
B0238.13	B0238.13	WBGene00015077	0	0	0	0	0	0	0	0	0	0	0.364358	0.39626	0	0	1.17485	0	0	1.40678	0.84876	1.17145	0	0	0	0	1.51999	1.0783	0.543223	1.9223	0	1.14071	2.18634	1.82087	0.321055	0.615118	1.10061	3.10776	2.26316	1.87412	0.562342	3.31585	0.749543	6.36233	2.83666	0.34911	0	0	1.68977
B0238.15	B0238.15	WBGene00044537	3.43383	0	1.81653	0.263717	2.41908	0	0	3.45278	2.12992	2.52499	0.83667	2.03106	0.642142	0.787395	1.9587	0.792007	3.41157	4.35686	2.05772	1.66374	0	0	3.19157	0.853508	0	0	2.32578	0	1.35263	1.14071	0	0	0	0.871675	0	0	0.604075	1.46845	0.68814	0.504349	1.57863	1.33462	2.95914	0	0	0	0
B0238.3	srt-68	WBGene00015068	0	0	0	0	0	0	0	0	0	0	0	0	0	0	0	0	0	0	0	0	0	0	0	0	0	0	0	0	0	0	0	0	0	0	0	0	0	0	0	0	0	0	0	0	0	0	0
B0238.5	srt-67	WBGene00015069	0	0	0	0	0	0	0	0	0	0	0	0	0	0	0	0	0	0	0	0	0	0	0	0	0	0	0	0	0	0	0	0	0	0	0	0	0	0	0	0	0	0	0	0	0	0	0
B0238.6	srt-70	WBGene00015070	0	0	0	0	0	0	0	0	0	0	0	0	0	0	0	0	0	0	0	0	0	0	0	0	0	0	0	0	0	0	0	0	0	0	0	0	0	0	0	0	0	0	0	0	0	0	0
B0238.7	B0238.7	WBGene00015071	0	0	0	0	0	0	0	0	0	0	0	0	0	0	0	0	0	0	0	0	0	0	0	0	0	0	0	0	0	0	0	0	0	0	0	0	0	0	0	0	0	0	0	0	0	0	0
B0238.8	srt-69	WBGene00015072	0	0	0	0	0	0	0	0	0	0	0	0	0	0	0	0	0	0	0	1.17145	0	0	0.408688	0	0	1.52975	0	0	0	1.39041	0	0	0	0	0	0	0.540871	1.46845	0.68814	0	0.766797	2.29717	0	0	0	0	0
B0238.9	B0238.9	WBGene00015073	65.3301	79.6794	76.1134	73.0796	87.2612	69.5527	74.6908	24.6693	27.0839	27.0899	26.5461	56.7834	95.1617	3.69966	5.75512	4.96459	3.55705	5.27561	6.36192	3.55811	0	2.63319	10.13	110.701	1.51999	2.73184	0.596023	0	4.76837	1.34295	0	0.610073	2.40324	3.29073	2.27341	1.51529	6.74844	1.46845	5.76491	2.10798	7.16415	5.81668	42.0306	141.222	0	5.7518	0
B0240.1	rhr-2	WBGene00004359	0	0	0	0	0	0	0	0	0.182698	2.31701	1.4511	0	0.262177	0	0	0.74606	0	0	0	1.17145	0	0.907762	0	0	0	0	0	0	0	0	0	0	0	0	0	0	2.60412	0	0.562342	0	1.06758	1.34893	0.936157	0	0	0	0
B0240.2	spe-42	WBGene00007117	0	0	0	0	0	0	0	0.249995	0	0	0	0.376627	0	0	0.341031	0	0	0	0	0	0	0	0	0	0	0	0	0	0	0	0	0	0	0.448663	0	0	0.228094	0	0	1.81054	0	0	0	0	0	0	0
B0240.3	daf-11	WBGene00000907	0	0	0	0	0	0	0	0	0	0	0	0	0	0	0	0	0	0	0	0	1.04583	0	0	0	0	0	0	0	0	2.78115	0	0	0	0	0	0	0	0	0	0	1.62386	0	0	0	0	0	1.39494
B0240.4	npp-22	WBGene00007118	346.515	318.1	384.399	337.99	227.234	356.415	369.904	192.475	196.361	145.845	177.481	273.236	286.242	60.4377	69.0576	74.5546	72.0431	51.4763	56.8251	71.434	65.455	55.2251	141.905	316.327	41.1153	38.597	45.4031	48.8469	54.4545	57.8875	36.8816	47.7094	37.7584	33.5669	49.6211	52.4754	52.1269	54.3302	38.615	56.4839	55.0843	47.3558	215.938	283.681	103.037	53.2451	87.8655
B0244.10	B0244.10	WBGene00015085	0	0	0	0	0	0	0	0	0	0	0	0	0	0	0.341031	0	0.974551	0	0	0	0	0	0.817476	0	0	0	0.798415	0	0	0	0	0	0	0	0	0.782161	0	0	0.562342	0.819757	0	0.472442	0	0	0	0	0
B0244.11	B0244.11	WBGene00015086	0	0	0	0	0	0	0	0	0	0	0	0	0	0	0	0	0	0	0	0	0	0	0	0	0	0	0	0	0	0	0	0	0	0	0	0	0	0	0	0	0	0	0	0	0	0	0
B0244.15	B0244.15	WBGene00206513	0	0	0	0	0	0	0	0	0	0.338864	0	0	0	0.787395	0	0	0	0	0	0	0	0	0	0	0	0	0	0	0	0	0	0	0	0	0	0	0	0	0	0.801719	0	0	0	0	0	0	0
B0244.2	ida-1	WBGene00002048	0	0	0	0	0	0	0	0	0.664466	0	0	0.792616	0	0	0	0	0	0.285077	0	0.502594	0	0	0	0	1.51999	0	0.543223	10.0474	2.70558	3.35732	0	1.22029	2.24385	1.65461	0.689758	1.26296	0	0	0.562342	1.00882	0	1.73698	0	0	0	4.15255	3.9626
B0244.4	B0244.4	WBGene00015079	0	0	0	0	0	0	0	0	0	0	0	0	0	0	0	0	0	0.317388	0.245617	0	0	0	0	0	3.37094	0	0	0	0	0	0	0	0.615065	0	0	0	0	0	0	0	0.749543	0	0	0	0	0	0
B0244.5	B0244.5	WBGene00015080	0	0	0	0	0	0	0	0	0	0	0	0	0	0	0	0	0	0	0	0	0	0	0	0	0	0	0	0	0	0	0	0	0	0	0	0.476979	0	0	0	1.17179	0	0	0	0	0	0	0
B0244.6	B0244.6	WBGene00015081	0	0	0	0	0	0	0	0.435653	0	0.311639	0	0	0	0	0	0	0	0	0	0.516505	0	0	0	0	0	0	0	0	0	0	0	0.910325	0	0	0	0.391033	0	0	0	1.17179	0	0.574563	0	0	0	0	0
B0244.7	B0244.7	WBGene00015082	0	0	0	0	0	0	0	0	0	0	0.291027	0	0	0	0	1.58421	0	1.39479	0.426117	1.7299	0	0	0.941198	0	2.93478	0	3.99674	0	0	0	1.47037	0.610073	0	0	1.63632	0.695637	0	0.405571	0	1.00882	4.44032	0.945	3.44414	0	0	0	0
B0244.8	egg-1	WBGene00015083	59.1836	54.3039	71.9094	4.22723	10.6988	23.997	91.2423	7.01864	7.62171	7.48887	8.60091	10.3365	118.86	7.03286	13.8687	9.32661	3.0093	11.8591	8.72131	8.31034	17.3038	27.1866	9.4333	68.2888	26.9627	11.4331	23.2388	24.0355	16.2711	11.4237	17.5019	18.6507	15.0604	17.6188	9.65546	11.4672	14.8688	11.842	11.2392	13.2093	13.7063	15.1042	8.30111	45.9805	11.6155	13.582	2.28599
B0244.9	B0244.9	WBGene00015084	0	1.94423	3.74324	0	0	0	0	0	0	0	0	0	0	0	0	0	0	0.209321	0	0	0	0	0	0	0	0	0	0	0	0	0	0	0	0	0	0	0	0	0	0	0	0	0	0.34911	0	0	0
B0250.1	rpl-2	WBGene00004413	6.8685	4.19288	5.17194	23.5727	12.2752	21.8697	21.3228	84.7855	80.0126	99.2794	97.1851	57.8956	62.3837	152.005	154.097	138.328	136.091	146.513	152.829	131.372	169.03	165.467	137.773	73.5226	139.54	186.737	218.2	201.402	161.442	190.479	203.487	205.517	205.265	243.293	196.097	197.444	186.536	224.523	191.554	216.617	229.278	185.129	148.673	80.3631	196.741	235.348	283.943
B0250.10	srbc-78	WBGene00007127	0	0	0	0	0	0	0	0	0	0	0	0	0	0	0	0	0	0	0	0	0	0	0	0	0	0	0	0	0	0	0	0	0	0	0	0	0	0	0	0	0	0	0	0	0	0	0
B0250.18	B0250.18	WBGene00206505	0	0	0	0	0	0	0	0	0	0.338864	0	0	0	0	0	0	0.974551	0	0	0	0	0	0	0	0	1.3215	0	0	0	0	0	0	0.258851	0	0	0.391033	0.581258	0.990855	0	0.504349	0	0	0	0	5.80703	4.53332	0
B0250.2	calf-1	WBGene00007119	0	0	0	0	0	0	0	0.251356	0.123597	0	0	0	0	0	0.928387	0.595905	0	0	0	0.864842	0	0.783866	1.19419	0	1.51999	0.888768	2.46526	2.22773	0	1.90793	3.11898	0.733	0.953123	1.21709	1.29158	1.79778	1.07193	0.526187	1.13811	0.819757	0	1.28135	0	0.694262	5.80703	3.03728	2.79023
B0250.5	B0250.5	WBGene00007122	68.8364	77.9306	75.5994	43.9554	57.8678	69.0512	39.31	50.5077	40.3534	51.2386	48.8478	44.9823	39.1341	32.717	61.7454	42.0276	57.2602	39.8331	42.131	63.2927	51.8374	63.4031	51.9745	42.7549	44.7008	37.5003	41.7517	34.2654	48.2108	36.3966	34.8814	38.47	39.685	34.6924	32.8321	48.4546	39.0525	50.4177	40.4425	38.2017	28.2922	32.2944	13.5671	32.3277	5.80703	21.097	24.899
B0250.6	srbc-79	WBGene00007123	0	0	0	0	0	0	0	0	0	0	0	0	0	0	0	0	0	0	0	0	0	0	0	0	0	0	0	0	0	0	0	0	0	0	0	0	0	0	0	0	0	0	0	0	0	0	0
B0250.8	B0250.8	WBGene00007125	4.99149	3.45157	6.86176	10.8114	3.28399	16.1518	14.4211	5.46755	6.20087	8.77501	5.69807	2.80665	2.18506	8.13093	7.62876	6.2572	5.79517	7.7258	8.96064	7.13766	8.78417	11.684	11.7822	3.89553	32.7309	14.6279	16.5882	13.2173	13.5868	17.0474	25.3133	18.7762	16.8353	23.7711	24.1862	19.1666	13.2749	24.9491	18.6597	37.2315	16.2873	17.419	19.2044	6.95916	19.8135	14.7085	19.251
B0250.9	dhcr-7	WBGene00007126	0	0	0	0	0	0	0	0.205833	0.566085	0.311639	0	0	0	0	0	0.595905	1.60751	1.31414	0.426117	0.502594	2.10106	0.907762	0	0	0	0	0	0	5.83788	1.67825	3.93096	2.56625	4.32327	3.52867	1.71647	0	5.30625	1.21701	3.77229	0	1.97364	4.13883	0	2.98175	0	3.03728	1.39494
B0252.1	B0252.1	WBGene00015087	0	0	0	0	0	0	0	0	0	0	0	0.359305	0	0	0	0	0	0	0	0.864842	0	0	0	0	0	0	0	0	0	0	0	0	0	0	0	0	0	0	0	1.00882	0	0	0	0	0	0	0
B0252.2	asm-1	WBGene00000211	3.43383	6.44101	3.49787	7.7626	0	5.01697	0	0.531914	0.123789	0.610223	0.721203	0	0	0	0.80975	0.595905	0.487201	0.604409	0.970582	1.89798	296.608	215.387	0.572129	0	0	6.07748	2.07727	6.20585	21.346	10.3397	7.10856	2.37288	3.5476	5.0461	4.00822	8.26549	7.74851	4.91332	785.782	808.51	4.71941	10.6322	4.95864	63.1341	11.9971	11.2464	12.543
B0252.3	B0252.3	WBGene00015088	0	1.12418	1.68133	2.62062	0	3.05731	0	0.12722	0.285472	0.311639	0	0	0	0	0	0.595905	0	0.368254	0	0	6.57179	10.116	0.908093	0	3.37094	0	0.798415	0	0	0	0	0	1.17122	0.847443	0.722232	0	1.35022	0	85.3634	79.9486	0.986701	0	0	3.14507	0	3.67578	0
B0252.4	cyn-10	WBGene00000886	94.074	114.582	79.5575	125.924	130.727	91.0542	76.3462	160.342	166.241	140.796	140.652	104.818	116.325	101.88	107.384	113.529	86.8536	107.89	96.4066	89.6957	41.5103	87.1454	76.9288	67.4489	49.3864	40.4102	52.5178	48.2277	26.2172	33.0751	52.627	29.8792	47.2167	42.2018	38.3593	38.9632	73.8784	50.6168	20.8022	17.9605	40.8636	52.2915	75.0828	91.2498	56.9769	141.35	87.3988
B0252.5	B0252.5	WBGene00015089	0	0	0	0	0	0	0	0	0	0	0	0	0	0	0	0	0	0	0	0	0	0	0	0	0	0	0	0	0	0	0	0	0	0	0	0	0.333352	0	0	0	0.685921	0	0	0	0	0	0
B0252.8	B0252.8	WBGene00044615	0	0	0	0	0	0	0	0	0	0	0	0.359305	0	0	0	0	0	0.285077	0	0	2.88046	2.40419	0.622063	0	0	1.25887	0.643177	0	0	1.14071	0.90129	0	0.838912	0	0	0	0.604075	0	2.54349	2.68521	1.39437	0.472442	0	0	0	0	1.68977
B0261.1	B0261.1	WBGene00015091	51.2016	77.9152	91.0925	70.4925	38.3479	85.283	104.266	42.3611	38.9305	26.9513	30.9594	35.3059	32.5386	15.351	34.6625	24.7805	16.1393	11.6414	20.4311	22.2071	10.8753	20.6941	31.3394	53.1958	2.93478	7.07814	13.2438	7.80838	14.9148	17.1413	8.11993	11.0898	9.59812	10.5189	9.76972	11.9649	11.7954	10.5533	16.387	8.90386	10.4129	10.8434	36.1133	52.0126	8.19806	7.82833	17.5475
B0261.2	let-363	WBGene00002583	93.8546	100.921	92.55	49.444	88.9949	126.189	86.8956	59.5438	75.9839	75.784	55.547	41.7457	29.3333	79.5073	75.4334	70.7457	77.7376	79.2786	68.4671	73.6589	43.865	54.3801	63.5685	25.5992	60.3786	48.4746	30.2995	38.4756	31.9562	47.9218	35.6062	46.6632	57.6555	57.6876	53.2991	52.8586	54.8184	29.3256	40.3339	29.8745	38.4528	44.5761	41.9069	25.8257	26.7729	6.60935	15.8859
B0261.4	mrpl-47	WBGene00015092	22.3995	11.1642	25.9698	16.3995	16.428	19.6702	24.5635	26.1711	23.2986	29.6571	31.8675	30.4157	23.8428	27.2111	27.0465	21.49	23.8334	26.3895	19.5154	31.9373	27.2927	23.9128	18.7906	22.5433	20.763	19.5588	21.2605	25.7745	22.1954	31.6805	30.5414	21.2567	19.685	26.9362	17.5723	27.2234	24.3766	30.566	20.7358	31.9128	32.6862	29.5166	21.6709	21.9801	26.3868	34.9592	26.3472
B0261.5	B0261.5	WBGene00015093	0	0	0	0	0	0	0	0	0	0	0	0	0	0	0	0	0	0	0	0	0	0	0	0	0	0	0	0	0	0	0	0	0	0	0	0	0	0	0	0	0.749543	0	0	0	0	0	0
B0261.6	B0261.6	WBGene00015094	0	0	0	0	0	0	0	0	0	0	0	0.39626	0	0	0	0	0	0	0	0	0	0	0	0	0	0	0	0	0	0	0	0	0	0	0	0	0.357222	0	0	0	0.300779	0	0	0	0	0	0
B0261.7	B0261.7	WBGene00015095	253.963	220.098	258.987	285.102	332.169	201.582	422.402	172.347	169.004	193.803	173.354	300.274	561.044	63.239	65.4281	43.1429	57.4657	65.7521	62.935	74.5671	53.9993	69.016	110.975	542.291	53.2952	25.6109	39.894	25.5622	56.3576	46.51	38.4816	45.7176	38.0388	39.1996	30.5685	42.1915	29.2779	26.9274	28.2748	10.6988	42.5046	34.0636	346.522	510.748	31.4347	14.0673	6.84537
B0261.8	B0261.8	WBGene00015096	3.99271	4.28457	5.42793	19.4708	4.1497	0.468274	22.6994	18.6128	14.558	9.15617	18.1418	10.52	7.26573	12.367	28.5215	25.1356	22.1921	17.4182	20.4033	9.32649	8.00208	10.1669	13.3431	5.38557	7.82572	20.2576	24.9617	19.1987	27.5429	24.5629	39.8697	31.6343	16.7946	27.8101	17.3379	24.8064	17.7376	31.5775	15.6288	17.2941	30.2195	16.7734	6.72354	5.14962	18.5749	14.5423	16.1659
B0261.9	B0261.9	WBGene00195057	0	0	0	0	0	0	0	0.12722	0.306487	0	0	0	0	0	0	0	0.974551	0	0	0	0	0	0	0	0	0	0.543223	0	0	0	0	0	0.223847	0	0	0	0	0	0	0	0	1.13166	1.52271	0	0	0	0
B0272.1	tbb-4	WBGene00006538	0	0	0	0	0	0	0	0	0	0	0	0	0	0	0	0	0.515653	0	0.383242	0	0	0	0	0	0	0	0	0	0	0	0	0	0	0	0	0	0	0	0	0	0.300779	0.862175	0	0	0	0	0
B0272.2	memb-1	WBGene00007128	0.997811	0	0	2.62062	2.0746	0.234108	0	2.04688	1.87356	0.582998	1.01086	1.59775	1.00881	1.8289	7.86931	3.12266	6.82686	5.44879	4.19386	0	0.9172	0	3.17886	1.70722	0	1.30829	1.28253	2.96014	0	0	1.8028	2.74684	0.365595	1.24678	0.291736	0	0.809352	0	0	0.801719	0	0.132087	2.6328	2.50336	0	4.15255	0
B0272.3	B0272.3	WBGene00007129	20.6156	26.7301	37.4072	44.221	34.1645	25.326	51.3536	76.2558	76.2777	63.1361	82.7855	77.2293	39.7077	126.833	134.365	139.639	111.487	113.735	113.695	90.4884	96.4437	73.6223	98.5859	29.2973	44.3672	47.4873	61.9996	50.7658	54.2154	54.7641	50.4601	65.3814	65.1513	72.9129	52.9127	64.0279	67.4197	56.9059	78.7912	65.2673	67.6925	59.071	47.7408	36.3754	20.5798	13.9618	36.4131
B0272.4	B0272.4	WBGene00007130	0	0	0	0	0	0	0	0	0	0	0	0	0	0	0	0	0	0	0.295398	0	0	0	0	0	0	0	0	0	0	0	0	0	0	0	0	0	0	0	0	0	0	0	0	2.38797	0	0	0
B0273.1	B0273.1	WBGene00015097	0	0	0	0	0	0	0	0.326081	0.123597	0.610223	0.667111	0	0.920697	0.787395	1.9846	0.595905	0	0	0.2565	0.502594	0	0	0	0	0	0	0	3.342	0	0	2.18634	1.63988	2.2347	1.1303	0.695701	0.443315	0.898093	2.11539	1.37645	0	2.76284	2.30092	0	0	0	0	0
B0273.115	B0273.115	WBGene00206473	0	0	0	0	0	0	0	0.243922	0	0.311639	0.60558	0.39626	0	0	0	0.792007	0	0.999701	0.383242	0.864842	0	0	0.28603	0	3.37094	1.0783	1.05571	0	0	0	0.90129	1.02312	0.321055	2.00459	0.827022	1.13895	1.14495	0.405571	0	0	1.43941	0.862175	0	0	0	2.07602	0
B0273.2	puf-7	WBGene00004243	286.148	162.385	137.58	271.949	336.294	229.334	260.987	236.047	266.074	280.617	255.952	502.914	417.422	65.6957	58.8282	52.7102	49.7452	64.7454	66.2398	67.3327	32.81	44.4853	208.826	523.387	30.4444	20.7801	24.5736	19.3929	33.3438	21.6927	19.8438	26.8796	32.8596	33.32	44.068	25.1888	35.9847	18.8271	24.9412	31.5115	26.2638	35.0716	516.186	433.512	11.9971	3.03728	0
B0273.3	B0273.3	WBGene00015098	24.0544	14.7752	23.9377	18.4778	22.096	23.2887	13.1022	6.03192	4.59696	2.96856	3.80706	6.07802	1.53323	4.67015	1.39711	2.92617	2.09474	3.11763	3.98442	4.70923	0	2.40419	3.80093	7.31164	3.04036	4.22992	1.08658	1.02754	0	2.44547	1.47037	1.83995	2.87879	2.15591	1.69632	0.921507	2.00275	0.526187	1.16704	0	0.749543	2.46632	1.92848	1.76496	0	2.07602	0
B0273.4	unc-5	WBGene00006745	4.06816	7.9758	9.06911	8.29009	6.72346	0.468274	1.261	3.15295	4.27816	2.5758	6.13972	4.40125	1.82636	0.91434	5.10736	7.34648	1.26613	4.1978	2.81646	4.87234	12.0594	6.90625	7.78649	0.557906	7.49588	2.5059	20.7328	12.7625	10.3249	1.90793	28.7777	23.9321	0.620231	1.06935	3.60947	1.81528	15.5801	5.9871	3.98581	5.91071	8.7248	14.2731	0	0.94289	28.0136	191.147	12.3434
B0280.1	ggtb-1	WBGene00015099	10.304	10.5151	1.81653	9.73387	26.7471	15.8311	11.1712	47.0191	43.8796	33.6163	42.4876	20.4735	19.375	25.0101	40.5581	32.4089	23.2163	30.6668	20.228	11.774	4.58824	10.4805	21.9934	15.1992	4.45478	4.1805	7.98183	7.71162	1.35263	5.03558	9.23726	7.19376	6.1574	9.40262	4.60226	4.58299	5.82445	7.98674	2.54349	14.927	5.23132	5.73347	15.8453	26.9195	26.0036	7.5706	5.87562
B0280.10	pot-1	WBGene00015105	6.9898	4.19288	1.80887	2.11155	8.79857	6.971	9.85348	8.91791	12.3187	15.0946	10.2826	13.7984	15.425	8.42642	5.67617	11.8559	6.22476	12.4557	7.94117	6.03398	4.45993	6.37026	8.82922	8.56181	8.26269	5.79075	14.0876	21.9154	13.3807	10.8195	13.4824	4.26746	13.9419	10.0803	12.8802	9.28868	13.7047	11.2171	14.6939	16.6856	15.0825	14.5552	20.4328	7.58653	35.6184	17.7999	29.1594
B0280.11	B0280.11	WBGene00015106	0	0	0	0	0	0	0	0.168193	0.285472	0	0	1.07818	0	0	0.533593	0.595905	0	0	0	0.864842	0	0	1.22723	0	2.93478	0	0	0	0	0.76722	1.28505	0	0.279629	1.404	5.34772	0	0.874224	2.3334	0	0	0	0.475646	0	0.721584	11.6155	11.03	0
B0280.12	glr-2	WBGene00001613	0	0	0	0	0	0	0	1.29208	1.12223	1.58964	1.43189	0.772887	0	0	0.682146	1.4923	0.515653	2.1866	3.57449	0.492291	0	3.18824	2.44773	0.853508	10.1153	2.73184	3.70869	1.03784	0	3.98047	0.90129	3.08101	0	2.03851	4.71378	0.391033	1.84124	1.21701	0	1.00882	3.44098	2.31731	2.2099	0.593779	5.80703	0	2.27284
B0280.13	B0280.13	WBGene00015107	0	0	0	0	0	0	0	0	0	0	0	0	0	0	0	0	0	0	0	0	0	0	0	0	0	2.60804	7.53029	1.11373	1.77902	0	2.70453	2.21417	0	0	0	0	0	0	0	0	0	0	0	0	0	2.07602	0
B0280.17	B0280.17	WBGene00044674	0	0	0	0	0	0	0	0.0831624	0	0	0	0	0	0	0	0	0	0	0.235491	0	0	0	0	0	0	0	0	0	0	1.34295	0	0	0.332311	0.365783	0.347808	0	0.228094	0	0	0	0	0	0	0	16.3981	0	0
B0280.2	B0280.2	WBGene00015100	0	0	0	0	0	0	0	0	0	0	0	0	0	0	0	0	0	0	0	0	0	0	0	0	0	0	0	0	0	0	0	0	0	0	0	0	0	0	0	0	0	0	0	0	0	0	0
B0280.3	rpia-1	WBGene00015101	75.5202	55.1573	84.2522	82.4177	71.2831	55.4683	46.4793	60.5591	53.2497	73.546	60.0516	52.0161	46.6084	71.7181	62.0727	54.1287	57.5282	57.6576	59.87	60.9744	97.7891	100.084	63.8969	46.6404	39.9184	46.6333	58.8873	58.4074	62.4893	58.9399	68.7297	44.7434	60.7522	65.4157	66.2714	65.7981	64.2256	71.9473	77.896	94.7466	65.3283	71.5324	60.9659	48.524	48.9821	35.968	48.7658
B0280.4	odd-1	WBGene00003845	0	0	0	0	0	0	0	0	0	0	0	0	0	0	0	0	0	0	0	0	0	0	0	0	0	0	0	0	0	0	0	0	0	0	0	0	0	0	0	0	0	0	0	0	0	0	0
B0280.5	cpg-2	WBGene00015102	846.07	370.307	343.786	42.2169	92.7728	180.904	332.212	27.6047	20.1751	49.2958	48.1619	162.797	518.125	8.41102	2.60302	4.66049	1.63584	9.33907	4.43333	11.371	1.04583	12.2328	20.2636	422.959	4.45478	3.51888	4.46859	5.93157	6.94732	8.41722	1.28505	5.50311	8.83052	4.43727	6.84795	4.17343	3.38883	3.0197	4.27316	4.5863	5.68452	10.3729	67.3546	302.426	11.6155	11.8858	8.22716
B0280.7	B0280.7	WBGene00015103	0	0	0	0	0	0	0	0	0	0	0	0	0	0	0	0	0	0	0	0	0	0	0	0	0	0	0	0	0	0	0.90129	0	0	0	0	0	0	0	0	0	0.766797	0	0	0	0	0	0
B0280.8	nhr-10	WBGene00003609	42.1192	53.6252	36.3718	66.8935	39.4081	42.3499	24.1732	34.9836	33.9602	28.7411	27.5899	21.2141	20.6585	31.0436	33.6588	24.3301	34.6694	39.5069	33.3848	36.484	44.3857	33.7949	42.4127	12.7248	24.2399	27.3514	31.2798	36.2163	22.283	24.1809	42.0725	39.8192	22.6882	33.7817	25.6958	25.4774	28.5223	30.6047	92.6009	94.4783	25.0892	29.4898	18.3866	21.4183	38.3884	30.1647	54.402
B0280.9	B0280.9	WBGene00015104	74.504	62.7564	64.7358	28.26	48.5328	56.0501	39.4837	43.3063	44.2167	64.0674	49.8706	51.0998	45.1859	40.9505	33.5867	31.6649	35.3573	32.6969	30.8593	39.9081	62.0819	54.5337	56.5221	38.8431	56.7804	41.2556	43.0184	35.9109	46.3459	45.9521	40.491	47.0518	43.6129	37.5554	40.397	40.3016	54.0949	46.1412	39.9781	51.0938	61.2348	57.6031	25.7982	20.5913	18.1888	41.6224	25.7451
B0281.1	B0281.1	WBGene00015108	0	0	0	0	0	0	0	0	0	0	0	0	0	0	0	0	0	0	0	0	0	0	0	0	0	0	0	0	0	0	0	0	0	0	0	0	0	0	0	0	0	0	0	0	0	0	0
B0281.3	B0281.3	WBGene00015110	0	0	0	0	0	0	0	0	0	0	0	0	0	0.970518	0.587355	0	1.03143	0	1.40039	0	0	0	0	0	2.93478	0	0	0	0	0	1.47037	1.4593	0	0	0	0	0.357222	0	0	0	0.766797	0	0	0	0	0	0
B0281.4	B0281.4	WBGene00015111	0	0	0	0	0	0	0	1.27847	1.29058	0.627422	1.30942	1.58562	0	6.67021	4.98913	5.36839	3.18356	6.20889	5.69777	1.0088	3.55244	0	2.81579	0	5.87029	6.945	4.86059	0.894763	3.84181	1.90793	0	1.42182	2.42251	1.792	4.06533	1.00524	1.6128	1.57895	3.50199	0.504349	3.67296	0.945	0	0.34911	0	0	0
B0281.5	B0281.5	WBGene00015112	5.99052	2.77686	3.63351	15.2431	11.5628	15.5949	23.9302	63.6127	65.2188	48.7503	63.9567	26.7255	16.3903	212.018	169.417	162.531	214.929	178.797	193.7	230.969	329.212	308.693	105.737	23.6514	412.667	549.122	469.969	598.276	583.484	474.667	510.699	482.683	464.501	425.136	501.272	561.495	438.377	689.755	417.511	506.213	486.678	539.214	143.011	141.558	675.28	812.799	707.72
B0281.6	B0281.6	WBGene00015113	0	0	0	0	0	0	0	0	0	0	0	0	0	0	0.404826	0.74606	0	0	0.245617	0	0	0	0	0	0	0	0	0	0	0	0.90129	0	0	0	0	0	0.561446	0.526187	0	1.17179	0	0.319305	0	0	5.80703	0	0
B0281.8	B0281.8	WBGene00015114	0	0	0	0	0	0	0	0	0	0	0	0	0	0	0	0	0	0	0	0	0	0	0	0	0	0	0	0	0	0	0	0	0	0	0	0	0	0	0	0	0	0	0	0	0	0	0
B0284.1	B0284.1	WBGene00007131	0	0	0	0	0	0	0	0	0	0	0	0	0	0	0	0.595905	0	0	0	0.984703	0	0	0	0	0	0	0	0	0	0	0	0	0	0	0	0	0	0	0	0	0	0	0	0	0	0	0
B0284.2	B0284.2	WBGene00007132	0	0	0	0	0	0	0	0.910927	0.245476	0	0	0	0	0	0	0	0	0	0.33084	0	1.18386	0	0.496827	0	0	0.90198	0	0	0	0	0	0	0.223847	0.971667	0.194083	0	0	2.3334	0	0.504349	0	3.93433	0	0.34911	0	0	2.27284
B0284.3	B0284.3	WBGene00007133	0	0	0	0	0	0	0	0.50135	1.81559	0.650504	2.40832	0	0	1.94127	0.404826	2.18393	0.632987	1.19571	2.53545	0.516505	0	3.13661	0	0	3.37094	1.1843	0.643177	4.20689	0	4.62785	1.8028	1.02312	2.13364	0.683127	2.52122	1.31042	0.585316	0.931758	1.70045	1.62148	3.88877	3.15718	0.936157	0.34911	0	3.03728	2.28599
B0284.4	B0284.4	WBGene00007134	0	0	0	0	0	0	0	0	0	0	0	0	0	0	0	0.595905	0	0	0	0	0	0	0	0	0	0	0	0	0	0	0	0	0	0	0	0	0	0	0	0.504349	0	0	0	0	0	0	0
B0285.1	cdtl-7	WBGene00007135	127.046	131.641	118.024	75.6476	82.1457	100.781	123.622	23.5942	26.9444	43.5973	33.6072	29.9168	28.2851	20.4497	17.2303	15.4431	17.6318	17.408	20.426	36.4609	16.6544	21.3908	36.1902	25.988	12.2816	13.8795	10.0321	10.6168	18.7833	20.3347	9.67961	9.34476	18.7963	13.0658	13.7842	11.5674	20.4331	5.66579	12.7553	19.1041	10.3044	14.3012	30.7256	39.1631	73.8578	51.4467	24.7212
B0285.10	ckb-3	WBGene00000513	0	0	0	0	0	0	0	0	0	0	0	0	0	0	0	0	0	0	0	0	0	0	0	0	0	0	0	0	0	0	0	0	0	0	0	0	0	0	0	0	0	0	0	0	0	0	0
B0285.3	B0285.3	WBGene00007136	44.8594	44.7039	39.9579	24.1646	51.4783	34.1821	32.5817	73.385	63.1022	75.4596	80.2983	61.2318	52.6879	71.6273	77.8897	95.8402	104.767	70.1684	88.0215	74.0505	45.179	81.807	80.8028	58.3087	58.3008	79.7503	78.1436	67.5508	50.458	80.5792	96.9481	71.3397	79.7304	87.7049	69.0842	86.5047	79.4843	58.1919	56.5786	40.4047	65.0626	63.9103	72.4737	63.4936	50.7792	63.9281	63.0832
B0285.4	B0285.4	WBGene00007137	83.6587	76.6404	68.079	102.295	51.3071	77.621	51.9583	103.122	103.885	64.2416	69.1895	52.5781	48.6818	46.8898	58.3138	35.5219	46.258	44.1899	34.8699	25.0044	10.3447	19.0351	31.1538	47.6576	4.89093	10.7002	6.27871	6.12969	1.77902	14.8546	3.98959	10.4127	8.86139	8.05849	6.74189	7.75235	11.6735	8.856	10.8034	15.0023	8.05565	8.1334	24.1998	25.0919	6.1901	34.1024	42.2454
B0285.5	hse-5	WBGene00002003	137.989	133.361	210.528	112.798	107.665	203.575	155.539	53.203	51.2849	49.0253	41.4447	64.1373	53.4002	47.6674	36.7393	40.6807	49.9597	54.0139	33.7149	42.1054	46.4838	55.0091	86.5849	82.7948	65.8463	46.8639	52.4261	50.6252	73.198	58.7139	54.285	50.8809	56.5957	54.289	64.6009	54.3106	65.0639	41.1186	39.588	72.2645	59.3955	55.2768	40.8309	52.0234	68.8045	62.8181	52.7389
B0285.6	B0285.6	WBGene00007138	0	0	0	0	0	0	0	0	0	0	0	0	0	0	0	0	0	0	0	0	0	0	0	0	0	0	0	0	0	0	0	0	0	0	0.726952	0	0.604075	3.72982	0	0	0	0	0.936157	0	0	0	1.68977
B0285.7	mnp-1	WBGene00007139	0	1.50734	0	2.62062	0	0	4.45284	1.01316	2.96378	1.93779	1.82589	0.881358	0.524419	16.9451	12.9214	9.63663	11.2821	12.7506	19.2267	6.44602	16.9379	6.76899	1.61584	0.557906	12.1774	16.6028	33.7406	48.7821	22.3857	33.5925	24.5151	17.4549	44.0359	22.3654	53.8861	38.9171	35.482	98.4613	52.2335	60.9291	10.3055	12.5591	5.30984	2.81753	28.0136	19.4575	12.8008
B0285.8	ckb-1	WBGene00000511	0	1.12418	1.81653	0.527499	1.20939	0.702496	0.315135	2.03139	2.48029	2.44422	1.63401	2.73252	0	0	2.67675	0.74606	0	0.992681	3.56547	1.17145	0.9172	0	1.90877	0	2.93478	1.52975	0	0	0	0	0	0	0	0	4.31988	1.50731	1.2083	0	0.68814	1.60363	0	3.34738	0	0	8.19806	13.2666	1.68977
B0285.9	ckb-2	WBGene00000512	3.43383	0	5.17961	2.11155	0	4.46282	0.630346	23.4077	22.1976	28.375	26.4327	23.7638	11.0489	26.0403	34.2323	31.302	38.3601	29.5817	27.5594	21.3383	13.7877	29.7972	42.8111	14.088	15.2178	23.3527	18.7741	9.03387	11.2915	18.6274	18.0918	12.7256	20.4627	21.6561	13.0494	22.3252	30.4154	30.128	13.9119	34.2961	24.0782	26.6352	24.7754	12.4993	5.80703	18.9158	2.27284
B0286.1	B0286.1	WBGene00015115	0	0	0	0	0	0	0.315135	0.0831624	0.416857	0	1.72709	1.11496	0.460292	0	0	3.02208	0.632987	0.81373	0.245617	0	1.18386	0	1.61068	0.853508	0	1.0783	1.05571	0	3.13164	1.14071	1.47037	0	1.67236	0.468985	0.388213	3.40509	2.10142	0	1.25048	1.60363	0.749543	1.31357	3.58189	0	0	5.1133	7.40074
B0286.2	lat-2	WBGene00002252	0	0	0	0	0	0	0	0.494274	0	0	1.16288	0	0	0	0	0	0	0.285077	0	0	0	0	0	0	0	0	0	0	3.55847	0	0	0	0	0	0.726952	0.921507	0	0	0	0	0	0	0	0	0	0	0
B0286.3	B0286.3	WBGene00015116	0	0	0	0	0	0	0	0.722373	2.11192	1.80373	1.55055	1.16924	0.524419	0	0.533593	0	2.00598	1.19009	4.07619	2.2464	2.88046	0.783866	2.46878	2.73914	0	0	2.29108	3.1791	1.75289	0	2.18634	0	2.1072	0.995866	0	0.443315	0.585316	1.0525	1.85518	0	0.749543	0.557099	0	0	0	0	0
B0286.4	ntl-2	WBGene00003825	191.303	249.686	339.368	207.672	187.599	262.174	248.59	140.191	122.331	108.082	131.076	110.801	90.9622	166.629	139.708	164.023	166.846	148.819	152.614	195.745	183.637	193.632	122.641	130.138	202.91	248.818	213.316	215.531	209.426	214.596	195.886	245.227	213.271	202.847	214.785	252.943	206.193	225.726	173.5	190.428	209.755	220.684	141.639	172.489	368.008	269.83	323.61
B0286.5	fkh-6	WBGene00001438	0	0	0	0	0	0	0	0	0	0	0	0	0	0	1.21284	0	0	0.209321	0	0	0	0	0	0.853508	0	0	0	0	0	0	0	0	0	0	0	0	0	0	0	0	0	0	0	0	0	0	0
B0286.6	try-9	WBGene00023425	0	0	0	0	0	0	0	0	0	0	0	0	0	0	0	0	0	0	0	0	0	0	0	0	0	0	0	0	0	0	0	0	0	0	0	0	0	0	0	0	0	0	0	0	0	0	0
B0294.1	B0294.1	WBGene00015117	0	0	0	0	0	0	0	0.832539	0.192642	0	0	0	0	0	0.341031	0	0.632987	8.00859	0.613212	0	0.9172	0	0	0	0	0	0	0	0	1.39041	1.5593	4.42943	1.61741	0.466789	1.60625	0	0.333352	0	0	1.17179	2.13527	0.313154	0	2.38797	0	4.53332	5.1279
B0294.3	B0294.3	WBGene00015118	0	0	0	0	0	0	0	0	0	0	0	0	0	0	0	0	0	0	0	0	0	0	0	0	0	0	0	0	0	0	0	0	0	0	0	0	0	0	0	0	0	0	0	0	0	0	0
B0302.1	kin-25	WBGene00002207	30.9347	22.412	41.1466	38.0847	30.5993	56.4936	47.2147	18.7057	22.9853	27.6093	26.6483	29.605	21.1446	23.8845	31.8665	43.136	28.6989	37.2476	31.4874	42.4572	29.2601	44.0717	46.6027	14.7558	29.1339	49.4967	51.1245	53.6868	53.9278	44.8594	27.2546	44.1556	50.6395	52.7145	54.1761	48.3597	45.3629	57.0454	22.264	53.6833	49.5786	64.4973	37.549	32.4712	12.3817	41.8964	47.3703
B0302.2	B0302.2	WBGene00015119	0	0	0	0.263717	0	0	0	0.12722	0.856626	0	0	0	0	0	0	0	0.487201	0	0	0	0	0.783866	0	0	0	0	0	0	0	0	0	0.72956	0	0	0	0	0	0.405571	0	0	0	0.132087	0	0	0	0	0
B0302.4	B0302.4	WBGene00015121	0	0	0	0	0	0	0	0	0	0	0	0	0	0	0	0	0	0	0	0	0	0	0	0	0	0	0	0	0	0	0	0	0	0	0	0	0	0	0	0	0	0	0	0	0	0	0
B0302.5	B0302.5	WBGene00015122	0	0	0	0	0	0	0	0	0.512293	0.271359	1.06349	0	0.262177	0.787395	0	0	0	0	0	0	0	0	1.56869	0	0	0	0	0	0	0	0	0.511496	0.223847	0	0	0	0.300071	0	1.16704	1.30607	0	0.132087	2.80916	0	0	0	0
B0303.11	B0303.11	WBGene00015131	0	0	0	0	0	0	0	0	0	0	0	0	0	0	0	0	0	0	0.295398	0	0.9172	0	0.622063	0	0	0	1.59702	0.894763	1.75289	0	0	0	0	0	0.347808	0	3.10501	0.81124	1.68744	2.94578	0	0	0	0.34911	0	0	0
B0303.14	B0303.14	WBGene00015132	4.99149	8.09447	7.2598	10.9315	5.85826	23.6003	1.89196	102.086	104.392	117.369	134.178	53.6799	11.2744	153.418	162.338	222.923	94.2324	217.918	184.155	144.77	85.4981	160.826	184.209	26.5767	155.631	52.3545	171.053	94.1877	129.095	171.367	125.726	75.1933	157.272	129.213	186.756	163.084	71.0121	36.713	32.0602	33.2397	96.1289	104.562	76.0688	32.0162	0	5.1133	15.2112
B0303.15	mrpl-11	WBGene00015133	52.2119	32.1949	45.4461	28.9127	32.9536	21.8697	17.8166	36.8463	35.8826	46.6799	46.2664	39.4396	38.3838	31.7818	38.4587	25.3344	16.0728	33.9937	32.5917	19.516	17.0575	19.4506	31.8164	46.8922	39.4736	17.9122	21.37	13.1671	24.8583	24.3058	14.1023	22.1455	27.6215	24.7379	26.2207	26.5486	20.3812	11.5671	15.1623	8.06604	20.5635	23.4594	18.3951	33.2583	12.3817	32.6227	22.3456
B0303.16	B0303.16	WBGene00044678	0	0	0	0	0	0	0	0	0	0	0	0	0	0	0	0	0	0	0	0	0	0.783866	0	0	0	0	0	0	0	0	0	0	0	0	0	0	0	0	0	0	0	0	0	0	0	0	0
B0303.2	B0303.2	WBGene00015124	8.1383	27.3646	20.1841	13.007	22.2514	9.17418	21.7538	2.812	1.98854	1.93895	0.991791	1.15192	4.75573	1.75791	2.42762	0.595905	3.09798	2.4241	1.68882	1.17145	1.18386	3.54095	5.17005	0.853508	4.89093	2.57637	6.37577	2.9707	3.5062	2.37365	1.8028	3.46464	4.52137	1.27587	2.37794	2.63902	1.70744	0.526187	3.56255	1.51342	1.45272	1.23091	1.11009	0	0	0	0
B0303.3	B0303.3	WBGene00015125	81.7431	66.9573	79.5902	89.5561	73.7367	89.7511	58.1786	182.806	182.862	162.223	192.583	164.094	111.994	224.452	210.812	212.755	222.504	191.755	202.73	208.151	200.232	219.86	219.827	100.93	155.891	129.427	123.862	101.464	113.656	153.252	108.081	156.339	127.975	132.032	119.276	118.038	133.024	90.9672	198.933	222.626	136.148	152.033	181.26	83.6361	81.044	53.3561	53.9558
B0303.4	B0303.4	WBGene00015126	44.8594	61.4667	48.4019	77.1231	90.1902	55.7474	74.5046	77.5426	101.417	70.7692	63.4859	80.521	73.7124	15.8435	27.5505	19.4099	20.6209	20.0131	22.5756	28.9087	30.6887	22.1906	57.2421	85.8697	12.2816	9.29791	13.9814	13.274	16.4882	11.2627	5.79371	10.7759	8.94218	10.2722	15.7221	12.5376	19.8061	11.2783	31.796	17.7433	26.4668	20.9563	60.2842	105.187	20.1952	21.9545	38.908
B0303.7	B0303.7	WBGene00015128	24.015	19.8458	20.0565	40.8687	40.7409	30.1368	45.2992	35.7806	38.5884	27.785	31.4949	23.537	32.5878	19.0938	22.2413	28.5156	16.0216	19.0916	22.9554	23.0852	3.79811	7.22629	16.8568	24.4272	6.0822	12.1297	11.3559	18.886	6.66398	14.9474	14.6102	24.2129	15.6998	19.4207	11.737	15.2678	15.284	24.9311	23.3294	32.4986	9.00203	12.9265	8.39233	14.2369	0	8.2091	16.6523
B0303.8	sdz-1	WBGene00015129	0	0	0	0	0	47.6334	0	0.872355	1.59837	127.96	238.2	0.39626	1.65095	0.91434	0	0	0.487201	0.402108	5.7145	68.5734	103.049	203.644	0	0	0	0	0	0	2.06279	0	1.5593	0	0.332311	0	1.26412	3.68873	67.0382	20.3144	48.9933	58.49	0	0.264206	0	5.9465	0	0	0
B0303.9	vps-33.1	WBGene00015130	17.1775	7.20792	9.17795	7.41781	10.6988	9.00461	10.4403	4.53341	2.86141	8.57647	19.7768	9.04235	20.2269	1.63094	1.68437	1.53807	4.38746	4.41102	3.15877	3.73755	16.5557	6.07037	4.89712	17.6989	3.37094	2.56896	1.13925	3.09316	9.03719	2.74695	1.47037	1.02312	3.0027	3.89785	2.59084	5.01561	7.74821	4.44175	4.06425	2.4959	4.0184	4.29169	7.0437	8.69034	8.19806	6.71305	8.24031
B0304.1	hlh-1	WBGene00001948	0	0	0	0	0	0	0	0.246698	0.362012	0	0	0.39626	0	0	0	0	0.515653	0.209321	0.2565	17.2007	0	0	0	0	2.93478	0	0	0	3.41542	0.839022	0	0	0.327975	0.448663	0.194083	0	53.1324	19.8423	0	0	0	1.2576	0	0.694262	0	2.07602	0
B0304.2	B0304.2	WBGene00015134	113.761	108.513	114.993	63.6937	108.383	118.935	143.045	30.8532	31.6772	58.5364	55.8348	100.295	134.332	19.0287	13.4288	8.13761	11.3657	13.9113	9.4151	21.4689	13.3952	20.8518	36.117	191.051	17.5056	3.46514	6.93895	3.99824	8.30028	5.9224	9.23726	12.35	8.85928	8.09217	12.7019	11.6181	13.3362	5.24711	6.44655	13.057	12.1726	15.5086	83.8449	212.611	8.19806	3.67578	2.27284
B0304.3	cyp-23A1	WBGene00015135	0	0	0	0	0	0	0	0	0	0	0	0	0	0	0	0	0	0	0	0	0.9172	0	0	0	0	0	0	0	0	0	0	0	0	0	0	0	2.13254	2.3334	0	0	0	0	0	0	0	0	0
B0304.4	B0304.4	WBGene00015136	24.015	29.0732	19.9136	11.5038	31.7704	20.7714	19.2496	13.1053	13.2563	11.4804	13.6156	8.48983	6.12153	1.75789	7.28547	6.14895	3.41806	8.60241	5.44216	10.5453	7.87457	4.75693	6.08204	3.20783	4.89093	4.73428	3.47381	6.07279	4.45847	4.93946	3.74564	2.82425	1.39303	1.90313	1.66584	4.06249	3.74492	4.78232	6.48285	2.61245	8.03668	6.59222	2.84721	1.7378	0	0	0
B0304.5	sra-32	WBGene00005058	0	0	1.81653	0	0	0	0	0	0.171365	0.650504	2.11701	1.45565	1.77558	1.8289	1.34334	0.595905	2.15162	0.285077	0	0	0.9172	0	0	7.75891	0	4.57537	0	0	0	0	1.28505	3.81419	0	0	0	0	0	0	0	0	0.685921	0.472442	1.88301	2.77806	0	0	0
B0304.6	sra-33	WBGene00005059	0	0	0	0	0	0	0	0.768424	0	4.81782	6.60377	0	0	13.8613	16.7645	17.8762	25.2124	1.00712	2.70558	4.81566	0.9172	4.80896	0.579929	3.89553	4.45478	18.8986	3.58802	4.37984	8.27458	7.12555	2.18634	9.61816	1.19613	1.24905	1.06156	1.05665	2.59112	0.931758	0	0	0	1.698	1.90028	0	0	4.53332	2.79023
B0304.7	sra-34	WBGene00005060	0	0	0	0	0	0	0	0	0	0	0	0	0	1.94127	0	0.74606	0	0	0	0	0	0	0	0	0	0	0	0	0	0	0	0	0	0	0	0	0	0	0	0	0	0	0	0	0	0	0
B0304.8	sra-35	WBGene00005061	0	0	0	0	0	0	0	0	0	0.311639	0	0	0.460292	0.787395	1.21284	0.792007	0	0.519689	0	2.15615	0	0	0	0	0	0	0	0	0	0	0	1.5204	0.447749	0.637211	0.194083	0	0.228094	0	0	0	0.749543	0.472442	0	0	0	0	0
B0304.9	sra-36	WBGene00005062	0	0	0	0	0	0	0	0	0	0	0	0	0	0	0	0	0	0	0	0	0	0	0	0	0	0	0	0	0	0	0	0	0	0	0	0	0	0	0	0	0	0	0	0	0	0	0
B0310.1	B0310.1	WBGene00015137	0	0	0	0	0	0	5.14113	0.12722	1.66743	0.627422	0.302753	1.16924	0	6.67021	0	1.19196	0	1.80646	4.94812	0	2.36801	2.40419	0.496827	0	2.93478	2.19727	1.43777	0	1.75289	4.22085	4.31472	1.24106	0	3.48254	4.96336	1.33206	0	0.526187	0	0	0.300779	0.604529	0.936157	0.34911	0	0	0
B0310.2	B0310.2	WBGene00015138	1.99586	2.77686	5.93318	2.78443	2.0746	6.7366	0.945635	20.4819	26.9478	39.647	57.0428	8.96641	6.18629	148.617	148.992	174.78	154.53	146.419	158.371	116.852	142.708	95.5714	37.2133	5.56965	158.797	125.686	114.675	68.2613	70.2214	90.3452	106.936	84.0489	82.0528	93.1767	82.0057	86.8814	103.494	52.2059	205.111	203.737	87.683	84.1814	28.0172	36.4296	0	4.15255	1.39494
B0310.3	B0310.3	WBGene00015139	0	0	0	0	0	0	0	0	0.171365	0	0	0	0	0	0	0	0	0	0	0	1.18386	0	0	0	0	0	0	0	0	0	0	0	0.591162	0	0.535286	1.33206	0	0	3.98622	0	0	0	0	0	0	0	0
B0310.5	ugt-46	WBGene00015141	0	0	0	0	0	0	0	0	0	0	0	0	0	0	1.21284	0	0	0	0	0	13.1373	1.81574	0	0	0	0	0	0	1.77902	0.839022	0	0	0.223847	0	0.413695	0	1.16266	1.98195	46.235	19.2735	0	0	0	0	0	0	0
B0310.6	B0310.6	WBGene00015142	0	0	0	0	0	0	0	0.10173	0	0	0	0	0	0	0	0	0	0	0	0	0	0	0	0	0	0	0	0	0	0	0	0	0	0	0	0.443315	0	0	0	0	0	0	0	0	0	0	0
B0331.1	cyp-29A4	WBGene00007140	0	0	0	0	0	0	0	0	0	0	0	0	0	0	0	0	0	0	0	0	0	0	0	0	0	0	0	0	0	0.76722	0	0	0	0	0	0	0	0	1.16704	0	0	0	0	0	8.19806	0	0
B0331.2	B0331.2	WBGene00007141	0	0	0	0	0	0	0	0	0	0.311639	0.431615	0	0	0	0	0.74606	0	0	0	0	0	1.01287	0	0	0	0	0	0	0	0	0	0	0	0	0	0	0.333352	0.405571	1.37645	0	0	0	0	0	0	0	0
B0334.1	ttr-18	WBGene00007142	0	0	0	0	0	0	0	0	0	0.311639	0	0	0	0	0	0	0	0	0	0	0	0	0	0.853508	0	0	0	0	0	0	0	0	0	0	0	0	0	0	0	0	0	0.132087	0	0	0	0	0
B0334.10	B0334.10	WBGene00007148	0	0	0	0	0	0	0	0.326081	0	0.881649	0.364358	0.376627	1.38121	0	1.39711	0	0	0	0.2565	0	0	0	0.408688	0.853508	0	0	0	4.45654	0	0	2.18634	1.63988	2.09383	1.1303	0.347808	0	1.12619	0.526187	1.37645	0.801719	2.76284	1.74989	0	0	0	0	0
B0334.11	ooc-3	WBGene00003868	106.841	61.0449	66.5271	92.9972	52.3632	80.1146	68.5081	68.9418	90.0823	51.3923	42.8339	80.5728	84.2664	10.8467	13.1495	8.4946	12.1056	14.7084	8.47766	11.3629	1.04583	5.28593	22.5336	93.8459	6.30572	6.26415	8.28593	2.14126	1.35263	7.01531	1.28505	10.2476	3.5498	1.89748	8.12724	6.13237	3.05656	3.79694	0.68814	2.81985	3.17994	5.29172	40.1026	98.9764	0	0	2.28599
B0334.13	B0334.13	WBGene00007149	0	0	1.80887	0	0	0	0	0.0831624	0.208403	0	0	0	0	0	0	0	0	0.202301	0	0	0	0	0	0	0	0	0	0	1.35263	0	0	0	0	0	0	0	0	0	0	0	0.766797	0	0	0	0	0	0
B0334.15	B0334.15	WBGene00195248	4.06816	6.77176	8.9258	8.81785	4.1497	6.50227	6.03005	12.3156	12.6257	9.32502	15.1828	9.09899	8.54639	19.1964	17.1262	22.8464	11.8876	14.173	8.8622	7.60292	9.44298	6.95866	16.6898	8.47651	8.91064	16.9217	7.68757	2.82759	10.5067	10.4323	9.77536	15.0571	10.9979	8.3384	5.95728	8.71988	11.1803	10.1943	11.5145	5.27973	10.1286	8.29586	23.1145	6.94307	11.9971	17.2596	18.7951
B0334.2	twk-5	WBGene00006660	0	0	0	0.263717	0	0	0	0.0831624	0	0.338864	0.592341	0.485098	0	0.91434	0	0	0.974521	0	0.471039	0.492291	1.04583	0	0.28603	0	0	0.888768	0	0	0	1.39041	0	0	0.279629	0	0	0	1.28852	0.931758	0	0	0.928353	2.58961	0	0	0	0	0
B0334.20	B0334.20	WBGene00219293	0	0	0	0	0	0	0	0	0	0	0	0	0	0	0	0	0	0	0	0	0	0	0	0	0	0	0	0	0	0	0	0	0	0	0	0	0	0	0	0	0	0	0	0	0	0	0
B0334.3	B0334.3	WBGene00007143	20.6156	9.81521	18.5109	21.4103	12.7971	23.8274	7.6092	41.1027	41.7059	38.7672	38.8111	35.6228	26.8344	36.9165	40.1733	60.1624	48.4192	56.786	45.2098	35.7178	43.9695	46.5505	24.6528	27.4634	22.7181	28.7599	27.2666	17.4736	9.74454	26.3258	25.4611	24.9729	26.9495	25.0357	20.4538	36.8586	29.6914	14.9591	38.8614	46.3003	26.5452	16.9741	16.5807	16.1003	22.2052	20.2578	9.68672
B0334.4	B0334.4	WBGene00007144	187.143	100.657	150.681	171.943	184.037	200.073	242.783	139.581	137.909	172.95	174.319	267.701	308.239	30.4974	32.0659	34.1637	35.1156	37.3328	40.2525	44.6378	25.0739	26.4031	126.726	311.589	30.5493	45.3406	37.0468	58.0446	50.4051	26.3959	47.5122	42.2352	34.6837	37.2954	31.0239	49.6549	42.2074	54.6639	55.7993	56.4818	62.8665	63.3354	188.996	315.1	85.0002	98.3934	98.8091
B0334.5	B0334.5	WBGene00007145	131.177	119.767	102.283	9.08183	7.93286	37.9503	82.5194	0.95282	1.64852	3.85681	1.38389	21.8755	47.4556	0.787395	0.682146	0.841967	1.49017	2.94044	0.897156	1.54989	1.18386	0.907762	1.65683	57.5312	11.1975	12.355	5.24695	4.75032	12.5312	1.60624	6.63615	8.5542	7.9839	5.03307	6.49973	8.55802	7.71808	11.2171	9.55953	9.65439	7.93537	9.7919	28.8005	50.7157	17.8056	24.3551	24.2688
B0334.6	B0334.6	WBGene00007146	0	1.50734	0	0	0	0	3.82249	0.665777	0.306294	0	0.655385	0	0.884309	0.787395	0.404826	1.68414	0.487201	1.60609	1.73421	0	1.04583	0	0	0.853508	0	0	1.27886	0.894763	1.35263	1.14071	2.94111	0	0.223847	0.280663	0	0.886739	0	1.7432	0	1.00882	1.28755	2.04387	0.626765	0	0	0	0
B0334.7	srh-44	WBGene00005267	0	0	0	0	0	0	0	0.0831624	0	0	0	0	0	0.91434	0	0	0	0.317388	0	0	0	0	0	0	0	0	0	0	0	0	0	0	0	0	0	0	0.333352	0	0	0	0	0	0	0	0	0	0
B0334.8	age-1	WBGene00000090	72.2871	83.8934	52.0552	52.5169	65.6375	48.4884	31.5125	77.8062	85.0257	23.9295	12.4893	13.957	29.4414	30.4247	47.2882	20.9002	35.0007	28.2264	40.9232	7.61432	5.12028	3.48856	5.08562	35.6168	5.97514	2.71442	14.2561	0.894763	2.06279	5.9224	5.12745	6.21636	7.73875	5.78591	12.1075	8.59227	3.10501	12.2307	6.5077	13.8224	2.20226	4.73319	4.68741	12.8283	8.19806	7.5706	12.1756
B0336.1	wrm-1	WBGene00006943	20.3607	13.1081	20.4373	19.7835	14.658	20.4577	15.3103	33.0085	38.0567	34.1049	33.7622	21.9037	14.7692	33.536	51.9853	36.2797	37.0041	44.1293	34.9428	44.2336	42.8152	52.4092	56.2025	14.1377	63.9613	56.4512	78.4496	81.5651	91.4138	67.266	73.7645	51.8685	78.5924	63.1664	69.9045	56.6069	66.7149	53.0717	41.734	52.9557	67.0551	66.896	38.8246	16.3289	66.0313	70.1538	114.757
B0336.10	rpl-23	WBGene00004435	19.0002	15.3602	26.749	51.7854	50.9408	43.8725	36.9943	168.807	169.701	180.389	183.117	124.948	103.057	220.947	211.291	193.917	174.449	197.089	197.977	207.868	301.477	290.68	192.772	117.29	266.463	248.436	353.761	321.243	318.158	384.288	339.803	320.309	322.712	355.288	335.567	317.279	341.453	346.661	327.038	390.65	413.223	347.216	259.333	171.349	385.057	300.622	411.866
B0336.11	hpo-28	WBGene00015148	0	0	0	0	0	0	0	0.243922	0.171365	0.542784	0.364358	0.39626	0.262177	0.787395	0	0	0.487201	0	0.954951	1.17145	0	3.43606	0.28603	0	0	0	0	3.10347	0	0	0	0	0	0.356548	0	0	0	0	0	0	1.49927	0	0.772733	0	6.1901	3.67578	0
B0336.12	B0336.12	WBGene00015149	0	0	0	0	0	0	0	0	0	0	0	0	0	0	0	0	0	0	0	0	1.04583	1.01287	0	0	0	0	0	0	0	0	0	0	0	0	0	0	0	0	0	0	0	0	0	0	0	0	0
B0336.13	B0336.13	WBGene00015150	135.926	117.883	115.573	175.297	143.561	171.462	156.19	128.51	122.587	153.075	167.43	168.683	157.337	99.2648	97.2765	93.4766	95.0371	94.869	98.213	111.464	76.1	99.2103	132.536	135.382	57.7873	33.5457	46.9656	29.4973	33.7758	39.112	20.3114	40.2119	38.1796	50.6707	44.6671	36.6601	62.9186	29.0794	26.059	26.8506	66.0222	50.9792	146.732	99.7911	30.5765	53.6746	48.7658
B0336.2	arf-1.2	WBGene00000182	144.948	179.691	143.113	233.265	195.344	156.801	116.623	269.224	250.685	212.011	242.992	159.964	91.6179	324.394	390.989	373.807	412.067	390.909	361.203	351.621	312.113	296.314	239.805	123.688	362.555	422.423	445.929	435.105	398.049	405.066	402.69	432.326	426.46	417.907	437.62	455.196	367.105	411.905	319.28	354.311	269.126	298.675	190.151	132.818	314.907	324.029	283.742
B0336.3	B0336.3	WBGene00015143	20.3607	10.7821	24.8383	25.3971	18.135	9.94875	13.7327	21.5084	24.5279	23.5567	20.0098	14.5907	18.6665	12.6054	27.5879	28.1686	27.5011	22.3762	25.9312	13.1597	21.0224	15.1385	12.8186	12.764	38.3882	38.594	37.9172	45.215	31.1192	35.899	34.7642	30.6448	38.0655	45.0108	37.3712	28.8346	28.9091	33.185	36.549	44.8165	28.1447	22.6952	23.4419	36.0214	62.6113	41.1423	49.5715
B0336.4	rgs-5	WBGene00004348	10.304	33.2505	12.4118	33.2426	19.3091	7.04495	6.66148	18.0974	12.3928	8.43279	7.43477	12.5722	11.2346	12.6765	13.9344	17.276	11.8306	11.9035	11.3571	8.49162	3.55244	4.29187	11.9344	16.439	1.51999	10.0589	13.322	9.29147	5.83788	6.6691	12.71	8.92959	11.7818	5.68666	6.87645	6.9915	12.5987	19.0708	13.5248	15.3648	13.1445	18.3413	9.15658	10.9024	6.1901	21.9545	15.2112
B0336.5	B0336.5	WBGene00015145	89.9617	76.9478	87.855	87.2751	74.5394	77.6836	65.7939	102.212	98.6186	86.6746	85.1359	96.0667	114.757	38.5739	37.0292	48.5974	35.9746	37.6803	44.4671	28.7376	31.874	31.2897	57.8605	86.5355	38.8175	28.9686	35.5155	38.2112	20.9258	35.1161	33.0076	27.7608	33.9069	21.9092	27.6112	27.6969	35.1236	48.476	37.6444	30.3105	16.5159	30.4976	66.3991	66.2426	30.9656	56.6761	61.0023
B0336.6	abi-1	WBGene00015146	82.6442	56.0723	50.1998	46.7281	71.5829	76.7345	161.954	24.5785	23.4169	36.9302	50.6693	171.524	352.992	12.1554	8.32054	14.0965	14.2959	18.6703	8.94938	16.4505	16.5322	17.6477	38.6784	348.978	19.2422	28.2063	35.6689	26.3647	34.9916	47.5469	27.2809	27.9553	29.9551	32.025	32.8289	35.102	35.5248	42.432	29.0696	35.9384	37.4965	39.2125	183.869	412.837	44.1983	94.4056	111.712
B0336.7	B0336.7	WBGene00015147	41.1113	44.578	59.2911	47.8478	40.9628	53.4377	70.9007	36.5293	38.763	39.09	32.1213	40.8577	33.9666	24.855	39.0137	34.2612	41.8095	41.7829	30.8595	39.0131	28.3425	37.0905	35.4041	78.6301	33.817	28.7134	32.4417	21.8799	31.9296	23.3411	21.1034	28.1734	32.9867	22.9136	27.8317	36.0627	27.7494	25.2898	19.6962	11.3551	27.4871	19.0568	45.3596	47.6346	5.80703	24.8302	31.4004
B0336.8	lgg-3	WBGene00002982	22.3995	7.42007	14.6302	25.2285	22.4853	21.8224	26.0991	58.4649	59.1958	53.4874	67.8868	58.5297	47.0027	46.6848	44.1666	54.9476	39.1203	54.6817	43.0695	44.8178	45.1527	56.0866	59.352	22.3133	20.3252	31.3654	29.4274	29.0865	32.2683	30.5714	55.5837	27.6941	36.4995	39.6074	30.8886	27.5969	37.4919	45.4085	23.9573	41.6405	25.9867	30.8555	40.5934	35.5168	37.6248	50.8505	36.2609
B0336.9	swp-1	WBGene00006359	9.98909	17.3184	18.2234	35.1028	24.7395	23.4416	32.2131	34.8885	40.9414	24.8245	27.2364	22.7666	28.4672	28.7421	49.9201	36.6798	40.1949	34.5808	24.4379	29.5319	8.13007	5.00399	20.6895	38.9967	28.0473	22.6677	11.1823	18.3053	22.182	20.6134	24.3781	10.238	27.0837	15.9904	23.4675	22.9943	14.9707	23.2988	24.4367	25.5621	15.9109	16.2783	25.7649	24.3777	28.3953	23.0724	37.3822
B0344.2	wrt-9	WBGene00006955	0	0	0	0	0	0	0	0	0	0	0	0	0	0	0.404826	0	0	0	0.491294	0	0	0	0	0	0	0	0	1.03784	0	0	0	0	0.329675	0	0	0	0	0	0	0	0	0	0	0	0	0	0
B0348.1	B0348.1	WBGene00015151	0	0	0	0	0	0	0	0	0	0	0	0	0	0	0	0	0	0	0	0	0	0	0	0	0	0	0	0	0	0	0	0	0	0	0	0	0	0	0	0	0	0	0	0	0	0	0
B0348.2	B0348.2	WBGene00015152	0	0	0	0	0	0	0	0	0	0	0	0	0	0	0	0	0	0	0	0	0	0	0	0	0	0	0	0	0	0	0	0	0	0	0	0	0	0	0	0	0	0	0	0	0	0	0
B0348.4	egl-8	WBGene00001177	6.9898	8.53184	10.6229	29.8661	8.79857	9.87667	6.08676	4.23177	4.48492	7.85264	7.17382	7.78084	9.51368	3.33328	4.05627	3.03074	5.30741	5.3789	6.58414	13.055	5.11041	12.3442	6.93243	8.0467	13.1556	3.89798	5.04867	7.73126	14.8137	10.0654	10.4037	5.54266	5.14947	7.98426	7.91386	7.87989	8.99533	5.59912	9.21418	5.2984	7.873	5.56097	8.74541	6.3726	16.3981	4.53332	6.52284
B0348.5	B0348.5	WBGene00015153	0	0	0	0	0	0	0	0	0	0	0	0	0	0	0	0	0	0	0	0	0	0	0	0	0	0	0	0	0	0	0	0	0	0	0	0	0	0	0	0	0.766797	0.237794	0	0	0	0	0
B0348.6	ife-3	WBGene00002061	51.5957	63.5889	72.5185	117.769	105.604	132.441	111.793	143.384	143.816	140.796	142.935	166.87	169.109	126.229	128.467	109.137	120.425	107.99	110.434	126.211	129.136	123.486	114.559	141.325	76.7163	55.0882	80.5743	61.9669	94.5506	84.4079	79.0364	82.6636	83.3246	93.384	98.1643	81.6393	73.4277	73.9064	85.1635	96.3424	73.5585	66.394	102.484	135.669	98.7816	72.1464	82.9475
B0350.2	unc-44	WBGene00006780	6.8685	6.13758	5.80565	13.6124	27.4361	10.5773	16.8652	28.1271	33.4261	32.0922	29.888	16.06	13.6265	19.4487	33.4292	28.3005	21.9961	37.4703	32.8913	31.4171	141.175	79.844	24.6817	10.9275	31.2101	26.8843	35.7873	37.4755	27.4255	35.9949	42.498	52.1805	49.0259	53.3907	58.85	53.4762	32.1905	35.983	343.376	349.184	56.0683	43.0441	46.5988	37.8628	34.5869	16.3604	21.6268
B0350.3	B0350.3	WBGene00015154	0	0	0	0	0	0	0	0	0.123789	0	0	0	0	0	0	0	0	0	0	0	0	0	0	0	0	0	0	0	0	0	0	0	0	0	0	0	0	0	0	0	0	0	0	0	0	0	0
B0353.1	B0353.1	WBGene00015155	0	0	0	0	0	0	0	0	0	0	0	0	0	0	0	0	0	0	0	0	0	0	0	0	0	0.90198	0	0	0	0	0	0	0.223847	0	0.413695	0	0	0	0	0	0	0	0	0	0	0	0
B0361.10	ykt-6	WBGene00015164	404.024	472.158	331.921	249.787	286.609	254.626	285.946	57.4038	58.3194	47.1525	59.0201	44.1765	33.1352	50.48	64.8841	57.723	63.1634	58.8043	48.4315	52.4162	20.5879	27.8786	67.4659	64.6984	30.5493	11.8767	17.0864	14.2678	10.4801	15.1849	2.57042	7.67662	15.1703	6.80652	10.4979	18.6333	16.5262	8.68741	14.6697	15.9129	21.2935	27.7236	44.9647	36.3481	23.6155	3.67578	6.81767
B0361.11	B0361.11	WBGene00015165	0	0	0	0	0	0	0	0.0831624	0	0.311639	0	0	0	0	0	0	0	0	0.2565	0	0	0	0	0	3.37094	0	0	0	0	0	0	0	0	0	0	0	0	0.526187	0	0	0	0	0	0	0	0	0
B0361.2	B0361.2	WBGene00015156	85.8513	93.1767	71.235	70.9542	69.1332	69.8398	86.4835	119.988	111.314	86.0026	59.3572	48.744	83.2687	72.1237	84.192	97.5816	91.2863	98.234	89.5993	54.6684	14.6785	23.8952	33.3343	92.9677	28.4838	35.3381	26.8698	14.8931	23.1953	35.5836	25.9744	22.8348	37.898	32.8398	30.4343	22.5656	29.4824	14.479	13.1795	23.584	14.4023	12.2902	28.2353	52.1822	11.6155	4.15255	1.68977
B0361.3	B0361.3	WBGene00015157	13.7404	10.1187	14.6085	8.86777	10.3525	22.7282	16.5738	20.5167	29.7533	19.68	20.3778	37.3037	29.3419	12.4543	18.1212	14.1103	8.32064	13.7167	12.5048	9.57834	6.03815	4.04437	18.1046	19.4482	8.91064	9.36983	13.5336	8.26268	4.76837	6.30639	2.18634	6.03918	10.3561	8.67123	11.2854	10.5153	4.17271	8.39836	17.0802	22.7052	6.12694	9.3889	17.5077	24.5926	11.9971	22.6498	13.8103
B0361.4	B0361.4	WBGene00015158	0	0	0	0	0	0	0	0	0	0	0	0	0	0	0	0	0	0	0	0	0	0	0	0	0	0	0	0	0	0	0	0	0	0	0.583543	0	0	0	0	0	0.300779	0	0	0	0	0	0
B0361.5	psd-1	WBGene00015159	50.9953	50.928	16.1605	43.7757	28.8651	40.6974	68.5321	7.12773	7.92673	8.07152	8.89886	21.8893	43.1611	2.67245	3.25439	2.97594	0.515653	5.31669	4.77224	2.87895	3.01848	0.783866	8.16125	35.8444	6.41129	4.28673	10.299	8.10288	11.6526	8.11903	13.4276	5.816	9.79952	7.55921	5.77503	11.7048	4.62751	12.7534	6.87914	4.14445	7.35432	7.08446	23.8182	47.4088	0	9.64662	7.93877
B0361.6	B0361.6	WBGene00015160	127.046	162.38	157.306	215.283	262.118	203.098	214.312	138.539	143.424	146.006	122.542	108.35	171.331	64.3263	67.9672	65.6788	47.6404	68.9189	58.035	60.2003	45.9444	67.7413	93.237	242.402	28.1622	45.15	36.2404	31.1294	28.6777	60.2756	42.8464	47.9244	42.4712	57.9667	48.4607	43.4587	45.0559	32.1845	39.6419	51.3067	54.0171	66.204	99.1433	233.678	23.9972	19.4575	13.8811
B0361.7	pho-5	WBGene00015161	55.0885	25.1136	45.4015	41.173	34.4127	56.9306	62.1688	15.3316	21.0157	16.07	11.9787	42.1043	102.397	2.47469	1.46198	2.58016	1.4902	0.969312	2.85326	2.19055	1.96303	1.69163	4.88029	139.243	1.51999	0	3.41289	1.78974	2.70558	1.53463	0	1.5204	0.804756	2.07092	0.539639	1.31642	1.62914	1.87412	1.12482	2.4959	2.36791	0.766335	26.5642	126.698	0	7.82833	0
B0361.8	B0361.8	WBGene00015162	47.1625	36.3573	37.4905	65.5722	34.2091	57.7568	47.1855	56.944	65.1715	68.8484	69.1304	66.1812	81.2215	15.4223	10.4917	16.5912	13.8321	14.9238	9.51207	16.7536	7.08398	9.43495	59.5982	81.6901	4.45478	4.65415	6.90879	4.83651	11.46	4.36447	4.02027	5.82562	6.45491	8.72056	4.62579	9.37549	8.39545	3.8457	5.45322	1.00882	15.9946	14.9918	58.1532	98.2689	8.19806	8.2091	9.03438
B0361.9	B0361.9	WBGene00015163	6.9898	6.08346	5.68731	2.64008	5.35909	3.67929	6.40213	9.04004	9.79732	8.1611	7.6509	8.73671	5.34503	4.41612	8.34152	4.41884	8.34962	4.18782	5.59231	4.38163	14.9536	9.42239	4.22001	10.2711	8.26269	0	2.79112	4.69409	3.5319	6.30639	1.5593	1.83067	1.60681	0.380654	2.5522	3.54213	1.18553	0	16.6724	19.0427	3.18913	0.63246	1.78505	9.4209	0	0	0
B0365.1	B0365.1	WBGene00007150	12.9906	8.92777	5.55977	7.68211	3.62906	14.65	12.0411	2.68007	3.88157	3.12219	1.61364	6.66851	43.8614	0.843547	2.01553	1.38791	2.43651	1.20687	0.33084	1.88394	2.88046	2.35217	2.02377	16.4979	2.93478	2.08628	1.44159	2.07594	1.75289	1.67825	1.47037	2.74014	2.23338	1.53544	4.47854	1.891	1.82395	0.990855	1.13811	0	0.685921	0.715663	1.34992	31.7337	6.1901	2.07602	12.5299
B0365.3	eat-6	WBGene00001137	110.544	106.225	114.374	148.933	92.9957	112.432	94.6649	44.2399	49.5123	79.0951	90.8429	139.772	149.257	9.15825	10.3119	12.251	10.2999	9.93857	12.2868	29.6384	21.1175	30.3323	109.956	219.831	9.34608	7.39531	8.10393	7.04529	12.3131	11.7029	6.59069	7.76944	9.96381	10.5312	11.5541	6.54752	21.9315	15.0035	9.26751	13.525	47.596	32.7387	104.478	188.734	0	3.67578	0
B0365.5	clec-225	WBGene00007152	0	0	0	0	0	0	0	0	0	0	0	0	0	0	0	0	0	0	0	0	0	0	0	0	0	0	0	0	0	0	0	0	0	0	0	0	0	0	0	0	0	0	0	0	0	0	0
B0365.6	clec-41	WBGene00007153	0	0	0	0	0	0	0	0	0	0	0	0	0	0	0	0	0	0	0	0	0	0	0	0	0	0	0	0	0	0	0	0	0	0	0	0	0	0	0	0	0	0.472442	0	0	0	0	0
B0365.7	dhc-3	WBGene00007154	0	0	0	0	0	0	0	0	0	0	0	0	0	0	0	0	0	0	0	2.34318	0	0	0	0	0	0	0	0	0	0	0	0	0	0	0	0	0	0	0	0	0	0	0	0	0	0	0
B0365.9	B0365.9	WBGene00219208	0	0	0	0	0	0	0	0	0	0	0.289588	0	0	0	0	0	0	0	0	0	0	0	0	0	3.37094	0	0	0	0	0	0	0	0	0	0	0	0	0	0	0	0	0	0	0	0	0	0
B0379.1	B0379.1	WBGene00007155	0	0	0	0	0	0	0	0.168193	0	0	0	0.39626	0	0	0	0	0	0	0.445441	0	0	0	0	0	0	0	0	1.78974	0	0	0	2.1923	0.948207	2.94706	0.347808	2.53046	0	0	0	1.63971	0.685921	0	0	0	0	0	0
B0379.2	B0379.2	WBGene00007156	0	0	0	0	0	0	0	0.203486	0	0	0.289588	0	0	0	0	0	0	0	0	0	0	0	0	0	0	0	0	0	0	0	0	0	0	0	0	0	0	0	0	0	0	0	0	0	0	0	0
B0379.3	mut-16	WBGene00003508	296	392.375	303.731	241.076	303.192	227.083	269.973	79.9412	82.1515	69.978	65.5929	62.2938	58.629	80.2534	104.647	106.229	115.763	105.352	101.46	103.583	72.8574	88.0057	91.9531	78.7962	89.6937	81.519	65.2559	87.8775	63.8234	71.9391	58.6104	90.9804	73.4329	80.532	80.4039	75.7057	81.0203	44.1372	50.969	59.211	83.1996	89.845	96.6342	51.2583	48.5974	38.5358	50.7784
B0379.4	scpl-1	WBGene00007054	0.997811	0	1.68133	3.41197	0	0.936776	5.71446	0.900136	2.81639	0.939061	1.88317	1.47204	2.28665	0	0.874624	1.63397	0	0.202301	0.235491	0	0.9172	0	0	9.38182	0	0.419519	0	0	1.35263	0.839022	1.5593	1.42182	0	0	0.535286	1.33206	0.840943	5.07293	0	1.30607	4.27106	0.132087	0.674795	5.84076	0	0	0
B0379.6	B0379.6	WBGene00007158	0	0	0	0	0	0	0	0	0	0	0	0	0	0	0	0	0	0	0	0	0	0	0	0	0	0	0	0	0	0	0	0	0	0	0	0	0	0	0	0	0.811831	4.5949	0	0	0	0	0
B0379.7	B0379.7	WBGene00007159	0	0	0	0	0	0	0	0	0	0	0	0	0	0	0	0	0	0	0	0	0	0	0	0	0	0	0	0	0	2.2817	0	0	0	0	0	0	0	0	0	0	0	0	0	0	0	0	0
B0391.11	fbxa-152	WBGene00007166	0	0	0	0	0	0	0	0	0	0	0	0	0	0	0	0	0	0	0	0.516505	0	0	0	0	0	0	0	0	0	0	0	0	0	0	0	0	0	0.526187	0	0	0	0	0	0	0	0	0
B0391.12	str-263	WBGene00006289	0	0	0	0	0	0	0	0	0	0	0	0	0	0	0	0	0	0	0	0	0	0	0	0	0	0	0	0	0	0	0	0	0	0	0	0	0	0	0	0	0	0	0	0	0	0	0
B0391.14	B0391.14	WBGene00206462	0	0	0	0	0	0	0	0	0	0	0	0	0	0	0	0	0	0	0	0	0	0	0	0	0	0	0	0	0	0	0	0	0	0	0	0	0	0	0	0	0	0	0	0	0	0	0
B0391.3	B0391.3	WBGene00007161	0	0	0	0	0	0	0	0	0	0	0	0	0	0	0	0	0	0	0	0	0	0	0	0	0	0	0	0	0	0	0	0	0	0	0	0	0	0	0	0	0	0	0	0	0	0	0
B0391.4	str-12	WBGene00006080	0	0	0	0	0	0	0	0	0	0	0	0	0	0	0	0	0	0	0	0	0	0	0	0	0	0	0	0	0	0	0	0	0	0	0	0	0	0	0	0	0.749543	0	0	0	0	0	0
B0391.5	fbxa-153	WBGene00007162	15.9943	13.7972	1.68133	7.51711	13.2933	5.32126	8.92783	4.16482	3.14021	3.92416	5.27035	9.70602	12.8129	0	1.55387	5.9469	1.78178	1.70875	1.07198	0.492291	0	0.907762	3.02002	9.59124	0	0.888768	6.34515	1.78974	0	2.51768	3.02967	1.95329	3.84643	2.08407	2.16362	2.72754	1.13224	4.56094	0.568984	0.819757	0.300779	1.186	1.61095	10.9176	0	2.07602	0
B0391.6	fbxa-154	WBGene00007163	0	0	0	0	0	0	0	0	0	0	0	0	0	0	0	0	0	0	0	0	0	0	0	0	0	0	0	0	0	0	0	0	0	0	0	0	0	0	0	0	0	0	0	0	0	4.53332	0
B0391.9	fbxa-139	WBGene00007164	0	0	0	0	0	0	0	0.238023	0	0	0.431615	0	0	0	0	0	0	0.418694	0	0	0.9172	0	0	3.59993	0	0	0	0	0	0	0	0	0.332891	0	0	0	0	0	0	0	0	0.237794	0	0	0	0	0
B0393.1	rps-0	WBGene00004469	3.43383	2.77686	1.80887	20.7017	13.8331	25.5186	19.7216	78.54	86.1741	95.9112	96.3905	68.8887	56.661	122.08	130.254	134.845	131.851	125.579	126.472	129.144	187.929	187.065	107.373	69.9736	159.904	129.627	180.073	174.468	157.325	172.225	183.917	167.613	160.655	186.046	152.504	172.067	169.506	166.469	174.54	181.761	216.935	171.997	130.055	91.19	200.662	265.753	235.826
B0393.2	rbg-3	WBGene00007167	84.6771	66.4627	81.34	121.348	108.346	89.5351	126.43	66.634	82.284	55.5215	49.9861	108.343	173.978	11.7049	9.55145	9.32336	13.4258	8.3176	11.1452	9.21516	9.96649	11.5941	29.1129	258.983	9.34608	13.719	4.31285	7.07279	15.2394	3.88794	5.45996	6.33587	7.17732	10.803	7.16907	7.64019	9.14052	9.54554	7.0843	6.88375	3.69679	13.7667	83.2347	234.389	16.3981	15.5038	11.9875
B0393.3	B0393.3	WBGene00007168	228.843	193.199	196.255	241.148	190.28	242.08	244.443	319.371	292.948	218.363	297.919	215.189	169.721	240.155	306.047	327.506	227.8	290.634	248.082	250.788	191.749	194.906	299.284	146.243	52.012	78.2278	72.7566	81.4599	63.8635	61.93	59.3269	72.3031	78.4854	74.7993	67.4158	69.0445	135.481	97.1659	102.005	83.5201	231.718	220.183	269.454	124.061	62.231	105.982	94.5061
B0393.4	B0393.4	WBGene00007169	0	0	0	0.263717	0	0	0	0.210383	0	0	0.431615	0.844404	0.524419	0	0.404826	0	0.974551	0	0.377722	0.864842	0	0	0	0	0	0	0	0	0	0	0	0	0	1.06073	0.413695	0	0	0	0	0	0.300779	1.31357	0.337356	0.34911	0	0	0
B0393.5	B0393.5	WBGene00007170	0	0	1.68133	2.62062	0	0	0	1.95598	1.42603	0.271359	0.289588	1.14961	1.0222	0	0	2.4302	0	0.402108	1.33267	2.34318	2.22969	0	0.28603	0	0	0	0.643177	0	0	0.76722	1.5593	0	0.258851	0	0.535286	0.304604	1.28852	0	0	0.819757	1.50463	0.264206	0	0	0	0	3.37995
B0393.6	B0393.6	WBGene00007171	174.673	259.91	210.823	160.519	201.509	166.799	104.138	35.5181	41.9782	73.7315	56.1984	107.914	131.096	2.78482	1.81317	2.28431	2.09474	11.4228	3.58988	5.95046	1.18386	1.79674	42.4259	115.438	1.51999	0.839141	4.22889	2.06538	0	0	1.5593	3.79167	2.82182	4.57516	2.2662	4.46523	0.91271	0.990855	2.26971	12.9052	3.06362	4.70078	76.9251	118.802	0	8.2091	2.28599
B0393.7	B0393.7	WBGene00007172	0	0	0	0	0	0	0	0	0	0	0	0	0	0	0	0	0	0	0	0	0	0	0	0	0	0	0	0	0	0	0	0	0	0	0.194083	0	0	0	0	0	0	0	0	0	0	0	0
B0393.8	B0393.8	WBGene00007173	4.06816	1.26952	1.68133	6.7246	0	12.7723	5.77147	10.2586	15.2526	15.7509	17.2729	9.57418	7.43556	22.7724	18.2542	12.6549	12.234	16.9807	11.9837	8.61151	19.6942	22.1384	19.4674	6.21716	24.0272	30.777	33.4652	16.5518	31.4985	16.8434	45.6766	21.4711	29.485	21.3192	31.2979	32.7132	23.1428	37.2337	29.2658	30.7692	32.3128	29.903	24.4819	13.6782	11.6155	19.6573	51.5655
B0393.9	B0393.9	WBGene00044636	0	1.26952	1.68133	2.78443	0	0	0	0.409318	0.478114	1.19329	0.911369	0.359305	0	0	0	0.792007	0	0.602465	0	1.17145	0	0	0.694718	0.853508	0	0	0	0	0	0	3.11898	1.10695	0	0	0.722232	0.391033	0.942625	1.51704	0	1.17179	0	0.319305	1.54565	0.694262	0	0	0
B0395.1	nhx-1	WBGene00003729	0	0	0	0	0	0	0	0.534558	0.247224	0	0.302753	0.376627	0	0	0	0	0	0.54378	0	0	0	0	0	0	0	0	0	0	0	0	0	0	0	0	0	0	0	0	0	0	0.300779	0	0	0	0	0	0
B0395.2	mboa-1	WBGene00007174	0	0	0	0	0	0	0	0	0	0	0	0	0	0	0	0	0	0	0	0	0	0	0	0	0	0	0	0	0	0	0	0	0	0	0	0	0	0	0	0	0	0	0	0	0	0	0
B0395.3	B0395.3	WBGene00007175	6.8685	4.33794	1.81653	4.2039	2.0746	13.476	6.97731	5.74818	4.59269	11.0133	9.25401	16.1905	10.1546	6.26016	13.499	4.60706	8.60268	3.36083	5.59135	5.07327	10.6197	12.0581	11.6277	19.2669	6.41129	6.03884	10.974	5.04501	6.52126	3.78841	8.34423	12.5324	1.9223	4.4928	1.66931	4.93053	5.36098	2.26951	9.64296	24.1361	8.11036	21.7169	26.0505	12.8144	0	7.5706	4.57253
B0399.1	kcnl-1	WBGene00007176	0	0	0	0	0	0	0	0	0	0	0	0	0	0	0	0	0	0	0	0	0	0	0	0	0	0	0	0	0	0	0	1.10695	0	0	0	0	0	0	0	0	0	0	0	0	0	0	0
B0399.2	oac-1	WBGene00007177	0	0	0	0	0	0	0	0.143794	0	0	0	0	0	0	0	0	0	0	0	0	0	0	0	0	0	0	0	0	0	0	0	0	0	0	0	0	0	0	0	0	0	0	0	0	0	0	0
B0403.2	ubc-17	WBGene00006712	0	0	0	0	0	0	0	0.10173	0	0.271359	0.291027	0	0	0	0	1.53807	0.515653	0.334459	0	0	0	0	0	0	1.51999	0	1.19219	0	0	0	1.28505	0	0.839915	0.365783	2.42671	1.39144	0.666786	0.81124	2.33437	0	0	0.132087	0	0.694262	0	0	0
B0403.3	B0403.3	WBGene00015167	0	0	0	0	0	0	0	0	0	0	0	0	0	0	0	0	0	0	0	0	0	0	0	0	0	0	0	0	0	0	0	0	0	0	0	0	0	0	0	0	0	0	0	0	0	0	0
B0403.4	tag-320	WBGene00015168	46.1533	52.421	76.8199	111.909	38.1662	77.1754	47.8265	212.17	205.536	158.837	226.862	145.271	126.924	298.664	298.06	282.152	281.371	211.74	285.283	305.872	316.647	335.087	233.434	119.166	260.373	237.072	256.533	333.686	261.393	262.451	298.65	353.852	264.695	253.268	234.718	250.344	298.444	362.107	383.264	349.687	329.342	350.492	163.057	156.321	283.094	272.413	267.569
B0403.5	B0403.5	WBGene00015169	0	0	0	0	0	0	0	0	0	0	0	0	0	0	0	0	0	0	0	0	0	0	0	0	0	0	0	0	0	0	0	0	0	0	0	0	0	0	0	0	0	0	0	0	0	0	0
B0403.6	B0403.6	WBGene00043982	0	0	0	0	0	0	0	0	0	0	0	0	0	0	0	0	0	0	0	0	0	0	0	0	0	0	0	0	0	0	0	0	0	0	0	0	0	0	0	0	0	0	0	0	0	0	0
B0410.1	B0410.1	WBGene00015170	0	0	0	0	0	0	0	0	0	0	0	0	0	0	0	0.792007	0.515653	0	0	0	0	0	0.470541	0	0	0	0.639352	0	0	0	0	0	0.223847	0	0	0	0	0	0	1.00882	3.83586	0.862175	0	0.698306	0	0	0
B0410.2	vang-1	WBGene00015171	26.4786	8.47744	9.30637	15.5705	18.8097	8.93188	10.5401	25.7841	24.1793	19.609	31.6799	7.51998	7.4202	32.678	35.2531	36.3764	39.953	17.727	17.6757	41.6002	193.007	161.545	33.8967	5.01148	90.9901	122.395	132.838	106.938	46.079	54.6061	145.548	148.53	53.0313	56.4663	50.7356	56.5731	71.3247	108.949	411.352	305.102	67.3194	64.6493	23.5195	48.4461	36.9819	55.3371	58.8726
B0410.3	B0410.3	WBGene00015172	0	1.94423	1.81653	2.62062	2.0746	0.234108	0	8.79358	5.29636	7.35831	7.99182	1.88572	1.81587	11.1752	11.4062	10.6164	12.7679	8.03527	10.7644	13.918	8.53527	6.55377	6.08971	1.79621	30.8857	10.4954	16.3772	8.22777	11.9509	11.188	13.797	19.7143	11.0946	8.29393	9.52152	6.67887	9.27785	5.65593	4.80642	9.01026	10.462	8.71948	3.94404	0	5.80703	12.9426	5.94117
B0412.1	dac-1	WBGene00000895	0	0	0	0	0	0	0	0	0	0	0	0	0	0	0	0	0	0	0	0	0	0	0	0	0	0	0	0	0	0	0	0	0	0	0	0	0	0	0	0	0	0	0	0	0	0	0
B0412.2	daf-7	WBGene00000903	0	0	0	0	0	0	0	0	0	0	0	0	0	0	0	0	0	0.209321	0	0.502594	0	0	0.993775	0	0	0	0	1.03784	0	0	0	0	0.321055	0.713184	0	0	0	0	0	1.63971	0	0.237794	0	0.698306	0	0	0
B0412.3	B0412.3	WBGene00015173	25.0186	12.2353	14.7316	34.4238	24.8611	42.4412	22.6645	46.6153	51.4358	39.7043	32.8409	18.7303	16.0508	56.179	52.5964	46.4148	52.781	57.9348	57.2072	46.1297	36.748	31.0271	17.7404	15.5011	23.8152	37.149	42.4354	30.5691	21.3753	34.1839	41.6683	46.5525	34.2887	49.2577	39.1778	48.659	37.1851	19.5282	19.3393	13.0796	9.93467	23.3606	7.07215	22.4629	0	8.15132	6.46548
B0412.4	rps-29	WBGene00004498	75.7386	101.983	142.014	177.873	163.402	188.206	174.89	248.402	237.093	252.115	251.619	169.974	126.999	384.926	284.756	314.298	323.02	369.203	310.476	306.415	415	407.461	320.655	146.991	410.462	357.592	454.727	429.575	470.187	472.67	506.6	465.6	437.481	475.024	467.638	462.806	457.196	506.152	488.404	559.962	477.104	509.775	336.579	240.255	411.738	424.594	438.097
B0414.1	srz-4	WBGene00015175	0	0	0	0	0	0	0	0.249995	0.514221	0	0.431615	0.376627	0	0	0	0	0.974521	0	1.19044	2.18025	0	0	0	0	0	0.419519	0	3.342	0	1.14071	0	0	0	0.448663	3.93302	0.443315	1.91968	0	0	0	0	0.638689	0	1.04759	0	2.07602	0
B0414.2	rnt-1	WBGene00004393	0	1.12418	0	0	0	0	0	2.30856	0.868989	1.79356	1.17303	0	0.460292	0	0.80975	1.43787	0.487201	2.23974	2.57025	1.0088	1.04583	0	2.60446	0.557906	3.37094	3.59537	4.25463	3.1791	0	4.1241	0	2.06937	0.999681	0.829317	0.194083	0.954075	0.228094	0.405571	1.16704	0.819757	0.986701	0.994262	1.52271	0	0	0	0
B0414.3	hil-5	WBGene00001856	477.834	268.212	383.492	475.651	522.866	454.958	418.999	924.348	848.864	773.968	863.047	981.387	818.607	812.819	774.35	781.071	831.567	754.301	831.198	701.134	673.842	652.139	1006.65	556.566	436.211	294.134	220.563	161.171	235.426	338.643	296.347	290.57	313.456	308.268	222.164	221.814	268.791	141.971	169.792	104.492	392.096	375.615	726.356	468.943	48.7788	32.6643	23.0454
B0414.5	cpb-3	WBGene00000772	190.961	249.981	272.56	182.153	243.497	237.949	183.179	109.722	106.868	106.716	92.7722	128.654	110.355	45.1709	50.0697	39.0342	54.5968	57.0381	41.6806	24.6013	14.4237	16.9018	105.535	136.81	16.3045	13.9452	9.35407	5.03658	16.8428	11.3526	5.60009	7.95378	13.8954	10.7944	16.4766	12.2034	13.8637	1.45807	5.67531	16.1377	7.5581	13.4501	88.6038	98.5344	0	0	1.68977
B0414.6	glh-3	WBGene00001600	28.0312	25.2971	24.3105	36.4593	26.037	18.6522	19.4504	25.4783	29.1223	21.4515	19.0864	14.0773	8.50054	18.0524	26.856	28.1569	27.9604	25.3369	26.6005	23.5421	11.9221	8.29828	21.5635	14.9986	19.7811	14.3255	13.6509	18.2581	19.4824	17.8253	18.5205	16.8404	16.9503	19.6754	13.2221	16.4695	21.5516	12.03	9.18135	11.2176	11.5216	14.2468	17.8681	9.69396	0	6.0753	1.39494
B0414.7	mtk-1	WBGene00003472	89.7732	109.72	73.6509	64.4499	34.0384	83.8668	115.766	71.2479	79.4599	62.6913	65.2301	40.0683	46.7857	89.6878	73.3418	83.3858	84.2522	97.9801	84.057	92.8985	81.1571	68.4468	57.4654	18.1152	70.3881	63.6103	52.2331	41.1971	39.0523	44.3954	85.009	49.2767	48.5369	62.601	51.3595	63.0324	60.6023	53.8355	53.1444	39.2716	64.6878	69.8499	44.9527	19.4181	38.0051	41.0375	39.0686
B0414.8	vps-51	WBGene00015176	59.1836	81.4972	52.6571	26.744	34.6405	22.7384	29.6665	1.83579	2.09392	0.814276	0.653946	6.4911	3.49759	0.970518	3.61669	4.92045	3.52512	2.04928	1.3335	1.85973	0.9172	0.907762	1.16	6.0436	0	3.69059	4.14813	11.5594	9.68013	4.48419	5.45996	4.573	5.55337	2.30803	6.34859	5.45865	7.86342	9.50732	6.27457	3.65785	3.1402	7.61788	3.32792	7.0478	0	23.8129	10.729
B0416.1	tmc-2	WBGene00015177	0	0	0	0	0	0	0	0.16076	0.247224	0	0.291027	0.376627	0	0	1.87707	0	0	0	0.2565	0	0	0	0	0	9.12553	0	0.798415	0	0	0	0	0.910325	0.620231	0	2.30287	0	0	2.85958	0	0	0.627574	1.57875	0	0	6.1901	3.67578	0
B0416.10	B0416.10	WBGene00206482	0	0	0	0	0	0.234108	0	0.226957	0.245476	0	0	0	0	0	0	0	0	0	0.2565	0	2.09192	0.783866	0	0	0	0	0.596023	0	0	0	0	0	0.329675	0.365783	0	0	0	0	0.562342	0	0	0	0	0	0	0	0
B0416.11	B0416.11	WBGene00206483	0	0	0	0	0	0	0	0	0	0	0	0	0	0	0	0	0	0	0	0	0	0	0	0	0	0	0	0	0	0	0	0	0	0	0	0	0	0	0	0	0	0	0	0	0	0	0
B0416.2	B0416.2	WBGene00015178	0	0	0	0	0	0	0	0	0	0	0	0	0	0	0	0	0	0	0	0	0	0	0	0	0	0	0	0	0	0	0	0	0	0	0	0	0	0	0	0	0	0	0	0	0	0	0
B0416.3	B0416.3	WBGene00015179	0	0	0	0	0	0	0	0.230124	0	0	0	0	0	0	0	0	0	0	0	0	0	0	0	0	0	0	0	0	0	0	0	0	0	0	0	0	0	0	0	0	0	0	0	0	0	0	0
B0416.4	B0416.4	WBGene00015180	21.0054	13.2672	23.3357	44.4075	50.1181	33.0846	48.4678	72.5532	71.0642	85.7649	76.9006	66.1212	46.6598	72.8545	84.1456	86.6014	90.6078	83.4862	78.144	121.409	97.2247	102.306	80.1347	43.8853	40.8888	32.6595	60.625	43.4524	47.0984	74.321	58.1446	57.0149	52.7216	64.3967	48.6177	44.121	55.1056	43.6631	38.9476	12.2674	64.721	57.7323	74.7336	46.4556	18.1888	11.1901	0
B0416.5	B0416.5	WBGene00015181	71.4812	75.1327	56.6722	133.339	76.9099	91.783	69.6628	127.835	128.034	116.217	125.07	113.596	86.0703	181.723	167.204	195.311	201.523	163.739	166.157	175.774	285.741	216.637	177.06	106.688	221.414	222.831	235.083	246.125	219.554	224.195	277.748	248.694	227.44	259.698	216.731	208.582	239.68	302.891	647.078	605.535	302.926	287.988	143.409	156.303	208.379	305.384	318.957
B0416.6	gly-13	WBGene00001638	13.7404	11.9839	7.12371	12.924	6.72346	15.2817	10.4849	6.14035	4.99174	4.62208	3.52432	2.9842	14.7746	0.787395	2.15126	3.96845	0.974551	4.32284	3.05768	2.71845	2.75227	3.61248	3.89925	13.9714	0	1.66676	0	0.894763	0	0	1.28505	1.42182	1.11548	0.380654	1.18259	2.11185	2.06309	1.92261	5.05872	4.23432	3.51253	2.94242	4.01029	6.68975	0	0	0
B0416.7	B0416.7	WBGene00015182	0	0	0	0	0	0	0	0	0	0	0	0	0	0	0	0	0	0	0	0	1.04583	0	0	0	3.37094	0	0	0	0	0	0	0	0	0	0	0	0	0	0	0	0	0	0	0	0	0	0
B0432.1	B0432.1	WBGene00015183	0	0	0	0.263717	0	0	0	0	0.245476	0.677812	0	0	0	0	1.21284	0	1.94934	0.519689	0.426117	1.17145	0	0	0.865959	0.853508	0	0	0	0	0	0	0	0	0	0	0	0	0	0	0	0	0	0.557099	0	0	0	0	0
B0432.10	B0432.10	WBGene00015191	12.2104	9.54973	7.11605	7.51711	6.72346	7.67453	7.29321	14.52	11.437	12.0756	14.0267	12.2302	17.0986	3.69916	3.9908	10.3689	5.82682	7.94972	7.26287	7.57563	6.15675	10.9711	13.1811	16.0147	11.3038	15.1978	12.0603	13.2065	23.318	15.6517	17.4683	11.2211	15.4016	11.2613	15.1984	17.224	17.3955	23.7865	13.1528	15.713	22.3313	14.2206	8.75945	15.1391	6.1901	33.3093	39.9319
B0432.11	B0432.11	WBGene00015192	0	0	0	0	0	0	0	0	0	0	0	0	0	0	0	0	0	0	0	0	0	0	0	0	0	0	0	0	0	0	0	0	0	0	0.726952	0	0	0	0	0	0	0	0	0	0	0	0
B0432.12	clec-117	WBGene00015193	0	0	0	0	0	0	0	0	0	0	0	0	0	0	0	0	0	0	0	0	0	0	0	0	0	0	0	0	0	0	0	0	0	0.280663	0	0	0	0	0	0	0	0	0	0	0	0	0
B0432.13	B0432.13	WBGene00015194	9.98909	7.18287	20.5476	16.4404	20.7094	12.1422	9.17029	52.3734	49.6284	20.024	22.3983	10.7359	32.1582	26.0654	29.2357	38.5361	22.4061	30.1283	25.8569	17.1338	24.9637	18.9773	9.07051	50.052	11.9525	12.5411	12.3436	30.2367	18.7327	10.6505	10.2483	15.6592	14.0099	12.4446	11.2196	13.2483	11.4479	14.2203	22.2565	16.7037	6.49528	6.50859	13.3183	31.4244	42.0255	28.2999	34.776
B0432.14	B0432.14	WBGene00044640	50.9953	71.9287	39.715	18.6429	48.3703	24.3088	11.5445	7.81462	8.64791	8.02278	2.91901	6.89901	1.88935	5.52851	6.78385	5.65706	1.78178	2.13985	4.04775	2.84578	0	1.62032	10.1981	4.74924	0	2.81942	2.14228	2.22773	2.06279	1.39041	1.5593	0.72956	0.591743	0	0.689758	0.819649	0.600216	0	2.39551	3.29761	0	2.225	5.07155	2.11028	5.80703	3.67578	2.79023
B0432.2	djr-1.1	WBGene00015184	46.9042	48.8377	54.3538	89.5322	51.3693	62.2666	63.0256	124.387	120.584	136.011	132.428	122.208	84.7941	110.592	131.399	138.336	147.718	113.356	130.19	127.474	110.477	99.7226	156.106	92.9023	93.496	97.654	102.243	86.2472	99.771	126.99	105.257	116.247	101.587	121.73	96.6809	94.8947	120.594	88.1097	78.8452	61.4386	111.208	113.781	118.876	88.6704	17.4254	47.442	40.7563
B0432.3	mrpl-41	WBGene00015185	2.03383	2.77686	2.06191	8.39129	2.0746	3.52559	0.945635	3.89272	3.27331	2.65862	4.49786	1.95954	2.58529	3.58724	6.51451	8.13379	5.22193	4.85163	6.05727	7.54609	6.5524	6.72959	6.80858	3.41528	1.51999	2.75699	5.26448	8.62712	8.70064	7.96065	15.96	4.99369	7.74205	6.32658	6.61126	5.35228	8.74139	8.61533	15.7015	6.46163	8.94593	12.5907	6.44312	0.34911	6.1901	11.03	25.4773
B0432.4	misc-1	WBGene00015186	84.6771	112.195	91.2138	103.174	106.283	52.0949	47.0476	31.1463	38.0173	27.8099	25.9071	19.6467	27.6268	26.6372	21.4791	38.1024	27.2731	25.7905	20.1031	14.1366	6.80841	3.54095	27.6754	32.0426	6.30572	9.05625	8.90521	8.94816	6.26405	4.59415	8.60001	7.51678	7.11205	7.27053	2.10346	2.38702	10.5407	9.25781	11.0088	15.2744	15.4816	10.0347	29.0037	44.7437	0	13.106	19.5134
B0432.5	cat-2	WBGene00000296	0	0	0	0	1.20939	0	0	0.440847	0.906616	0.271359	3.39599	0.753346	0	0.970518	0	3.9687	1.46175	0.334459	0	2.03629	2.75227	4.86215	3.77224	0	1.51999	3.75803	1.08658	4.6182	0	1.67825	0	0	2.75523	2.11215	1.61103	1.67593	3.14207	2.73897	1.13811	2.45987	5.77311	1.84001	0.626765	3.08628	0	3.67578	3.66778
B0432.6	B0432.6	WBGene00015187	0	0	0	0	0	0.234108	0	0.791114	1.12543	0.650504	0.291027	0.485098	0	1.75789	1.8002	0	0.974551	0	0.701942	0.864842	0.9172	0	0.865959	0.942699	0	0	0.643177	0	0	0	0	1.83651	0.620231	0	0.722232	0.593272	0.333352	1.46845	0.562342	2.79327	0.811831	0.237794	2.81917	0.34911	0	0	0
B0432.7	B0432.7	WBGene00015188	0	1.50734	0	0	1.20939	0	0	0.760969	0.761946	0	0.289588	0	0	0	1.61767	0	0.632987	0	0	0.492291	0	0	0.572129	0.853508	0	0	0	0	0	0	1.28505	0.72956	0	0	0	0	0	0	0.568984	0	1.62386	0.132087	0	0	0	0	0
B0432.8	B0432.8	WBGene00015189	18.3224	5.6473	12.9221	7.25288	9.14254	13.162	8.55761	2.96495	2.41255	1.46478	3.01067	12.7854	20.1475	2.5455	0.404826	0	1.60754	0	1.48165	2.18025	3.01848	4.096	0.470541	27.0864	0	1.74112	1.13925	3.26557	0	0	0	1.2445	2.95704	2.44784	1.24139	3.55817	1.46273	3.71562	3.53445	12.1644	0.811831	0.864178	13.6042	7.95304	14.3882	3.03728	16.7225
B0432.9	B0432.9	WBGene00015190	0	0	0	0	2.0746	0.234108	0	1.39082	0.42879	2.87692	0.59378	0.376627	1.56284	0.91434	1.39711	2.28005	1.60754	0.779876	0.576457	4.4064	0.9172	0.907762	0.694718	1.41141	0	3.53209	3.57759	0.894763	1.35263	0	0	2.03189	2.63196	3.37248	0.413695	2.13007	1.9543	1.45807	1.37645	1.97351	0.685921	2.81048	0	0.34911	0	7.35245	2.28599
B0454.1	lin-8	WBGene00002997	9.98909	15.1083	8.91946	24.219	21.6008	32.6303	5.08349	26.2243	26.9858	22.6211	25.2903	19.6578	17.8889	24.6072	37.7437	36.2721	53.4972	23.771	32.9041	26.604	22.8198	28.0024	28.1281	11.726	36.6482	41.009	41.0283	20.3512	21.5575	28.8844	32.2556	39.2941	30.7865	30.3034	14.8504	30.1273	24.5746	27.7685	24.7953	19.9953	27.2946	34.7173	22.4972	8.82579	50.993	59.7068	45.7942
B0454.10	sri-30	WBGene00005542	0	0	0	0	0	0	0	0	0	0	0	0	0	0	0	0	0	0	0	0	0	0	0	0	0	0	0	0	0	0	0	0	0	0	0	0	0	0	0	0	0	0	0	0	0	0	0
B0454.2	sri-31	WBGene00005543	0	0	0	0	0	0.234108	0	0	0	0	0.431615	0	0	0	0	0.792007	0	0	0	0	0	0	0	0	0	0	0.798415	2.00849	0	0	0	0	0	0.705117	0.247903	0.378748	0	0	0	0	0	0	0	0	0	0	0
B0454.26	B0454.26	WBGene00206372	0	0	0	0	0	0	0	0	0	0	0	0	0	0	0	0	0	0	0	0	0	0	0	0	0	0	0	1.11373	0	0	1.47037	0	0	0.280663	0.194083	0	0	0	0	1.00882	0	0	0.936157	0.34911	0	0	0
B0454.3	sri-28	WBGene00005540	0	0	0	0	0	0	0	0	0	0	0	0	0	0	0	0	0	0	0	0	0	0	0	0	0	0	0	0	0	0	0	0	0	0	0	0	0	0	0	0	0	0	0	0	0	0	0
B0454.4	sri-29	WBGene00005541	0	0	0	0	0	0	0	0	0	0	0	0	0	0	0	0	0	0	0	0	0	0	0	0	0	0	0	0	0	0	0	0	0	0	0	0	0	0	0	0	0	0	0	0	0	0	0
B0454.5	B0454.5	WBGene00015196	0	0	0	0	0	0	0	0.12722	0	0	0	0	0	0	0	0	0	0	0	0	0	0	0	0	0	0	0	0	0	0	0	0	0	0	0	0	0	0	0	0	0	0	0	0	0	0	0
B0454.6	B0454.6	WBGene00015197	0	0	0	0	0	0.234108	0	0.102904	0.36544	0	0.667111	0	0	1.8289	0	2.3766	0	0.334459	0	0	0	0	0	0	0	0	1.1864	0	0	0.76722	1.28505	0	1.90532	2.11858	2.20419	1.41292	0	0.526187	0	0.801719	2.13527	2.11525	1.11009	2.1695	0	0	1.68977
B0454.7	clec-2	WBGene00015198	0	0	0	0	0	0	0	0	0	0	0	0	0	0	0	0	0	0	0	0	0	0	0	0	0	0	0	0	0	0	0	0	0	0	0	0	0	0	0	0	0	0	0	0	0	0	0
B0454.8	B0454.8	WBGene00015199	0	0	0	0	0	0	0	0.136293	0.53308	0	0	0.753346	0	4.47253	1.74946	0	2.49339	2.39666	0	0	2.88046	1.81574	0.470541	0	4.45478	1.0783	3.74154	4.23676	3.81568	8.38308	11.4762	2.4893	3.96557	3.2904	2.05864	3.30428	1.27086	0	1.82625	1.99155	4.84329	1.91046	0	0.698306	0	0	0
B0454.9	B0454.9	WBGene00015200	4.99149	1.50734	0	15.7406	22.8208	10.8286	9.80513	34.5203	33.6471	25.7001	40.7308	22.9857	29.0321	15.4227	32.3065	34.3752	47.7504	23.2898	32.9877	18.4572	28.1928	32.1845	22.9646	16.8087	35.7842	39.2767	23.1982	27.0992	19.9704	27.2258	22.8558	40.4752	20.3547	36.9933	24.3933	27.0812	36.8636	35.3757	31.6852	40.2656	37.5235	37.6216	17.1755	13.9604	31.4347	39.0643	25.4406
B0457.1	lat-1	WBGene00002251	274.955	340.466	238.72	337.432	300.396	202.706	159.863	155.119	185.911	73.7639	41.5748	96.751	71.2133	64.3684	116.952	122.975	45.7963	80.5086	93.1517	26.3422	18.2636	10.0429	25.7296	36.1591	34.0453	34.4333	17.6388	13.1878	28.7072	40.9726	27.8399	20.8381	66.1212	19.7196	45.4915	19.1631	43.2736	28.3419	10.406	10.9965	25.8103	30.9671	36.0767	17.222	32.9676	46.4928	388.807
B0457.2	B0457.2	WBGene00007178	0	0	0	0	0	0	0	0	0	0	0	0	0	0	0	0	0	0.404651	0.766578	0	0	0	0	0	0	0	0	0	3.55847	0	0	0	0	0	0	0	0	0	0	0	1.37201	0	0	0	0	0	0
B0457.4	B0457.4	WBGene00007179	0	0	0	0	0	0	0	0	0.171365	0	0	0	0	0	0	0	0	0	0	2.22615	0	0	0	0	0	0	0	0	0	0	0	0	0	0	0	0	0	0	0	0	0	0	0	0	0	0	0
B0457.6	B0457.6	WBGene00007180	0	0	3.36307	2.62062	0	0	0.315135	1.22159	0.112359	0	0.655385	0	0	0	0	0	0.487201	0	0.2565	0	0	0	1.34989	0	0	0	0	0	1.75289	0	0	0.733	0	0	0	0.476979	0.540871	0	0	0	1.37712	0.706649	0	0	0	0	0
B0462.1	B0462.1	WBGene00007181	0	0	1.68133	0	0	0	0	0.710776	0.371457	0.854424	1.27726	1.16924	0	0	0.587355	3.56856	0	2.188	6.04868	1.87015	0.9172	1.81574	1.94286	0	4.45478	1.94926	1.43777	2.07594	0	0.76722	0	0.511496	2.71263	1.2986	2.71871	3.74488	0.357222	0.405571	5.16656	1.32411	4.75088	0.709512	0	0.34911	0	0	0
B0462.3	fbxb-119	WBGene00007182	0	0	0	3.93986	2.41908	0	0	27.3167	24.2067	26.8995	21.1604	2.58784	0.984711	89.1088	73.67	108.978	66.7331	62.0309	76.3274	48.6752	62.6582	108.837	19.5084	7.97041	219.324	179.186	156.482	167.097	201.091	186.624	146.365	161.772	126.054	147.959	160.825	146.637	152.46	185.146	146.231	149.81	114.395	116.995	17.5368	49.7753	43.175	90.0046	38.9329
B0462.4	B0462.4	WBGene00007183	0	0	0	0	0	0	0	0	0	0.939061	1.53882	0	0	0	0	0	0	0	0	0	0	0	0	0	0	0	0	0	0	0	0	0	0	0	0	0	0	0	1.12482	0	0	0	0	0	0	0	0
B0462.5	B0462.5	WBGene00194695	0	0	0	0	0	0	0	0	0	0	0	0	0	0	0	0	0	0	0	0	0	0	0	0	0	0	0	0	0	0	0	0	0	0	0	0	0	0	0	0	0	0	0	0	0	0	0
B0464.1	dars-1	WBGene00001094	108.483	77.5943	83.9741	148.841	141.212	139.76	155.824	154.877	151.873	161.876	191.109	254.031	255.647	119.066	112.644	127.332	116.629	120.191	123.339	105.382	109.111	121.686	158.474	255.929	70.7405	56.7442	73.0039	79.4586	85.8427	77.912	76.7592	72.4661	78.0584	70.5867	74.8218	75.3121	89.8489	86.14	69.0116	82.3346	77.2379	70.0055	161.541	270.256	60.2186	74.9061	52.1011
B0464.2	B0464.2	WBGene00007184	165.777	239.195	200.47	172.465	226.59	138.667	214.414	214.587	230.049	247.295	213.987	164.696	151.499	356.756	301.693	286.521	305.648	278.311	307.731	353.943	302.433	330.447	254.151	142.153	240.412	351.758	287.777	297.723	278.576	260.855	218.656	255.242	301.214	304.482	268.167	311.199	297.854	261.487	263.597	265.707	290.104	308.895	215.803	139.215	342.64	267.94	295.796
B0464.3	nlp-36	WBGene00007185	51.5957	67.0642	45.1902	72.9763	88.5671	38.2484	19.0395	97.1754	100.42	76.867	70.1563	32.5021	22.8518	99.894	86.0509	113.107	97.7234	119.571	101.909	69.6078	42.1492	43.2521	26.8399	17.0549	92.8342	62.4025	52.9395	63.5479	43.4151	68.0219	49.3015	75.2205	58.1327	74.9276	51.1896	54.5617	55.8642	33.9528	34.9506	39.0418	9.53164	30.0369	16.5393	9.15391	0	3.03728	3.97575
B0464.4	bre-3	WBGene00000268	86.7148	60.5319	72.9389	61.9009	71.8469	92.1984	138.017	21.7361	16.2088	20.9099	19.8816	68.8649	122.194	5.40112	6.672	4.56436	6.53991	9.04303	8.08587	6.63889	5.65437	5.73699	7.48751	109.502	9.78306	3.69059	5.45663	7.95156	7.1915	6.34461	4.55823	5.58585	6.66516	8.22355	6.19699	5.89783	9.07393	10.7397	4.60408	11.5696	9.73777	9.11004	40.5906	126.559	11.6155	0	7.33646
B0464.5	spk-1	WBGene00004980	123.568	125.028	141.864	184.373	280.108	211.472	200.144	138.097	161.261	150.084	125.081	243.944	223.831	133.381	133.14	119.857	129.002	119.24	120.253	137.159	176.542	158.473	116.834	308.817	125.117	141.752	128.621	167.555	139.298	142.023	145.661	149.3	154.887	159.035	155.455	199.606	144.7	150.822	142.213	201.82	116.58	148.262	177.642	246.773	231.673	280.571	302.46
B0464.6	B0464.6	WBGene00007186	151.887	141.606	163.423	167.284	162.861	210.513	180.284	141.843	138.65	181.316	162.328	152.414	125.485	54.0671	65.8112	43.9235	49.0146	59.938	58.1998	88.3519	119.708	130.587	220.005	116.739	58.9917	47.5082	51.623	48.8872	63.0034	61.4057	27.9733	55.6677	47.833	47.179	62.1214	54.8477	63.3093	78.4486	47.9745	50.5357	128.432	111.404	203.936	121.151	116.682	144.256	140.53
B0464.7	baf-1	WBGene00000235	362.837	377.014	407.448	351.456	421.018	314.255	293.777	263.119	240.746	234.969	251.01	209.566	133.918	362.852	383.193	373.021	359.747	354.408	358.877	465.402	480.692	382.459	357.7	160.248	455.619	609.771	593.243	562.21	595.534	557.038	648.176	626.179	571.049	550.521	528.871	551.633	589.33	667.997	477.679	478.531	574.838	553.659	340.313	291.653	482.585	513.472	541.323
B0464.8	tag-342	WBGene00007187	85.8513	90.609	71.5592	75.7606	88.6962	57.59	38.6517	61.9199	66.0184	51.1363	67.0277	40.115	40.6002	57.406	67.1986	83.8436	51.3917	77.0512	54.2785	56.7196	40.6654	47.481	48.5605	37.8209	35.9948	50.1379	31.7678	26.1803	37.573	52.1187	46.0459	42.4731	39.6002	48.6079	40.7295	40.4437	48.5995	31.2819	28.4418	22.1365	53.2813	39.5168	66.7866	37.2305	48.5974	27.7646	42.4315
B0464.9	B0464.9	WBGene00007188	65.3698	70.8444	62.1439	59.379	63.2651	63.7509	43.3602	85.391	80.8508	64.3086	90.4821	85.9586	78.9312	52.0011	61.1041	69.2695	61.2392	61.8572	58.8287	72.2347	59.1404	65.7424	92.4368	67.5349	12.3879	29.7552	26.5463	16.9948	24.2839	31.1578	35.3398	26.6307	29.0833	30.8914	20.8826	21.2528	38.2306	21.2517	32.9699	12.4021	41.8534	36.5894	76.3687	56.6932	34.2037	35.0748	54.4418
B0478.1	jnk-1	WBGene00002178	0	0	3.36307	0	0	0	0	0.785103	1.01855	2.60556	1.18202	0	0	0	0	0.841967	0	1.00712	0.426117	0	0	0.783866	1.28802	0	0	0.888768	0	0	0	0	0	1.10695	0	0	0.357944	0	0.357222	0	0	0	0	1.14927	0	0	0	0	0
B0478.3	B0478.3	WBGene00015202	0	0	0	0	0	0	0	0	0	0	0	0	0	0	0	0	0	0	0	0	0	0	0	0	0	0	0	0	0	0	0	0	0	0	0	0	0	0	0	0	0	0	0	0	0	0	0
B0491.1	B0491.1	WBGene00007189	0.997811	1.26952	4.12432	0	0	0	0	0.801838	1.42033	0	0.431615	0	0.904383	5.64236	2.04744	2.18393	0.974551	0.746081	2.95874	2.18025	1.04583	0.783866	0.993775	0.942699	6.30572	7.17514	4.39175	11.9392	1.35263	9.2598	13.8293	13.5072	4.87231	8.84905	8.89062	11.2887	6.02595	8.93427	8.9333	7.56907	2.18384	3.1205	1.534	2.43628	22.2052	35.0267	13.5343
B0491.2	sqt-1	WBGene00005016	0	0	0	0	0	0	0	0	0.123597	0	0	0	0	0	0	0	0	0	0	0	0	0	0	0	0	0	1.59702	0	0	0	0	0	0	0.356548	0	0.391033	0	0	1.25712	0.801719	1.57863	0	0	0	0	0	0
B0491.3	rmd-3	WBGene00007190	0	0	0	0	0	0	0	0	0	0	0	0	0	0	0	0	0	0	0	0	0	0	0	0	0	0	0	0	0	0	0	0	0	0	0.347808	0	0	0.526187	0	0	0	0	0	0	0	0	0
B0491.4	lgc-20	WBGene00007191	0	0	0	0	0	0	0	0.327105	0	0.271359	0.291027	0	0	0.91434	0	0.595905	0	0	0.566331	1.17145	0	0	0	0	0	0	0	1.11373	0	0	0	0	0.656031	0.356548	0	0	0.581258	0	0.568984	0	0	0	0	0	0	3.67578	0
B0491.5	B0491.5	WBGene00007192	34.3761	40.257	33.8863	48.693	41.0761	71.6708	68.0244	30.9205	29.1207	34.1306	33.8645	29.838	29.624	30.7049	44.6632	52.1502	43.1514	44.219	43.7352	45.0163	18.8857	41.3115	48.242	44.2244	61.786	53.7083	61.7691	56.0758	51.4434	52.639	54.8459	56.6436	47.9341	43.1421	44.6602	43.3291	47.1139	51.1534	48.906	50.4429	56.3424	50.8433	46.3422	24.8982	54.4073	36.663	38.1174
B0491.6	B0491.6	WBGene00007193	12.2104	7.94872	7.24447	17.2135	11.0646	9.56033	25.2806	16.3738	19.8825	22.9443	22.5424	21.2024	14.4408	3.64297	9.60513	5.12004	3.09798	7.49482	7.94497	9.30051	2.75227	7.26752	16.8342	16.7507	8.8065	4.06678	5.95711	7.07279	2.70558	1.90793	3.8424	2.55043	2.00224	1.6754	3.08337	4.48399	6.11484	0.990855	1.93879	0.504349	7.65038	3.18684	23.1267	19.7722	0	7.18983	1.68977
B0491.7	B0491.7	WBGene00007194	44.8594	69.7152	75.4207	37.8017	27.9571	35.3694	32.3575	10.2491	9.69195	14.9153	11.3876	11.8036	9.01204	3.69916	5.31638	7.30068	6.02928	11.0737	7.23142	4.95383	5.7721	1.81574	7.16321	13.7378	4.89093	4.0789	3.11423	3.09316	1.35263	8.54095	2.18634	9.00373	4.23056	5.4009	1.89973	4.6397	3.95839	10.0436	4.80642	3.61322	5.67055	6.86928	5.31433	6.43815	0	15.1431	2.79023
B0491.8	clh-2	WBGene00000529	0	0	0	0	0	0	0	0.249995	0	0	0	0	0	0	0	0	0	0	0	1.17145	0	0	0	0	0	0	0	0	0	0	0	0	0.449755	0	0	0	0	0	0.562342	0	0	0	0	0	0	0	0
B0495.1	sre-1	WBGene00005149	0	0	0	0	0	0	0	0	0	0	0	0	0	0	0	0	0.515653	0	0	0	0	0	0	0	0	0	0	0	0	0	0	0	0	0	0	0	0	0	0	0	0	0	0	0	0	0	0
B0495.10	cpna-5	WBGene00007044	0	0	0	0	0	0	0	0	0	0.271359	1.24773	0	0	0	0.80975	0	0.632987	0	0.2565	0.502594	0	0	0.496827	0	0	0	0	2.22773	0	0	0	0	0.223847	0	0.194083	0.378748	0.300071	0.81124	1.13811	1.63971	0	0	0	0	0	0	0
B0495.2	B0495.2	WBGene00015203	36.0756	58.8788	74.7289	54.9475	51.1342	53.438	31.5589	80.3156	97.8444	68.7735	65.1077	75.7674	68.1714	23.7616	22.9171	27.1394	13.8613	20.9856	18.1319	8.88989	9.18652	19.6182	41.1379	35.2019	8.91064	6.00308	8.52491	8.15929	19.2939	14.2271	10.6284	4.56101	7.35561	6.64945	7.56362	5.13886	7.47905	13.6811	6.61403	14.7338	11.5798	5.76835	51.8715	39.7306	19.8135	20.7749	18.1971
B0495.4	nhx-2	WBGene00003730	0	0	0	0	0	0	0	0.269924	0.112359	0	0	0.359305	0.262177	0	0	0	0	0	0	0.492291	0	0	1.07676	0	0	0	0	0	0	0	0	0	0.559326	0	0	0.391033	0	0	0	0	0	0	0	0	0	0	0
B0495.5	B0495.5	WBGene00015204	8.98908	10.5151	9.06911	2.37578	7.93286	14.8129	1.57644	12.9018	10.4866	6.66812	13.8214	7.85427	4.8704	13.3116	18.3821	10.968	9.81471	14.4021	14.2871	8.69668	10.223	10.2913	6.14587	3.76587	0	12.7091	6.93547	9.05449	7.658	3.45344	8.48999	5.53753	5.56503	3.25132	8.28296	13.7406	4.96102	13.5844	6.86585	4.08195	4.89826	4.59236	9.20619	3.40658	14.0051	17.3749	10.5011
B0495.6	B0495.6	WBGene00015205	48.1719	51.8419	42.7401	83.3623	100.544	67.8153	89.8141	124.381	118.902	112.105	125.157	110.797	83.627	79.0499	79.1017	80.3671	79.0981	81.9473	77.5994	57.0061	49.7681	96.4731	103.755	79.8169	37.949	44.6538	40.4663	34.4485	64.1856	36.2921	50.3278	42.6839	40.3109	46.4074	29.8498	37.6568	57.138	44.0885	71.8855	77.4851	43.8034	64.4233	102.612	78.3841	91.1993	86.9273	73.6128
B0495.7	B0495.7	WBGene00015206	75.7386	108.809	74.0071	102.215	80.2485	113.991	78.8039	87.3841	96.7193	89.4068	101.82	79.1904	71.5454	119.374	127.199	130.112	119.849	128.023	133.912	166.029	201.724	158.567	112.8	83.0961	124.04	116.441	139.9	144.615	105.029	145.026	126.79	150.132	119.682	122.138	120.529	124.118	131.246	143.65	189.582	146.665	136.884	158.647	113.615	84.0531	110.867	51.3875	61.238
B0495.8	B0495.8	WBGene00015207	18.3224	17.9147	19.7868	13.8611	16.2363	17.3202	9.53788	44.5676	42.9802	30.0612	28.6342	22.6306	17.3646	46.4483	64.7852	65.8586	45.4859	62.0492	49.0122	34.2965	12.6023	24.4753	28.469	27.2034	53.9496	66.347	63.1131	55.5532	80.2305	51.082	63.7269	71.9499	58.1794	65.7885	55.8831	58.9916	57.6323	40.2406	26.8199	42.5598	20.3218	24.4287	22.9244	29.1058	54.2023	64.0272	56.7912
B0495.9	B0495.9	WBGene00015208	27.4941	19.3537	31.1765	23.0493	27.4608	25.4738	25.2245	40.3864	38.5402	42.6755	46.5127	38.3484	36.3446	32.1124	35.6429	37.4059	30.8756	43.2791	31.5551	27.3071	39.7593	46.0792	44.4561	47.8189	28.8077	25.2385	26.4688	15.9398	26.0864	28.6257	21.4416	16.0135	15.3183	17.9464	21.5387	14.6423	23.9566	24.9439	25.2818	34.4108	23.1621	27.7151	26.7196	38.3608	0	25.6303	13.9248
B0496.1	B0496.1	WBGene00015210	0	0	0	0	0	0	0	0	0	0	0	0	0	0	0	0	0	0	0	0	0	0	0	0	0	0	0	0	0	0	0	0	0	0	0	0	0	0	0	0	0	0	0	0	0	0	0
B0496.11	B0496.11	WBGene00194883	0	0	0	0	0	0	0	0	0	0	0	0	0	0	0	0	0	0	0	0	0	0	0	0	0	0	0	0	0	0	0	0	0	0	0	0	0	0	0	0	0	0	0	0	0	0	0
B0496.2	B0496.2	WBGene00015211	0	1.50734	0	0	0	0	0	0	0	1.35479	0	0	0	0	0	0	0	0.334459	0	0	0	0	0	0	3.37094	0	0	0	0	0	0	0	0	0	0	0	0	0	0	0	0	0.132087	0	0	0	0	0
B0496.3	unc-82	WBGene00006814	0	0	0	0	0	0	0	0	0	0.582998	0.257424	0	0	0.970518	1.06732	0.595905	0	0.702713	0.706645	0	0	0	0.408688	0	0	2.2949	0	0	0	1.14071	0	0.610073	0	0.515126	0.388213	0.757589	0	0.526187	0	0	1.53378	0	0	0	0	0	0
B0496.5	srtx-1	WBGene00015214	0	0	0	0	0	0	0	0	0	1.88272	0	0	0	0	0	0	0	0	0	0	0	0	0	0	0	0	0	0	0	0	0	0	0	0	0	0	0	0	0	0	0	0	0	0	0	0	0
B0496.6	B0496.6	WBGene00015215	0	0	0	0	0	0	0	0	0	0	0	0	0	0	0	0	0	0	0	0	0	0	0	0	0	0	0	0	0	0	0	0	0	0	0	0	0	0	0	0	0	0	0	0	0	0	0
B0496.7	valv-1	WBGene00015216	0	0	0	0	0	0	0	0	0.385331	0	0	0	0	0	0	0	0	0	0	0.516505	0	0	0	0	0	0	0	0	0	0	0	0	0	0	0	1.17338	0	0	0	0	0	0	0.626765	0	0	0	0
B0496.8	tes-1	WBGene00015217	2.99416	3.21375	5.17961	3.57597	3.28399	1.17111	0	7.14761	6.76552	2.68871	3.53153	1.54837	0.524419	4.37463	6.31024	3.71857	5.3898	4.1595	5.82122	4.59896	0	0	5.05439	0	3.37094	2.02364	0.798415	1.11373	1.75289	2.15763	1.8028	0	0.620231	0.615118	1.2294	0.476979	2.09021	0.526187	0.568984	0.819757	0	0.237794	1.69742	0.694262	0	2.07602	37.1826
B0507.1	B0507.1	WBGene00015218	0	1.26952	0	0	2.0746	0	0	0.755506	0	1.35479	0.868976	1.25799	0.524419	10.9771	2.28332	3.22646	11.8514	1.91541	2.80113	0	2.22969	0	0	0	8.8065	6.04946	13.0103	30.1093	5.41248	3.65839	3.3621	11.5108	18.3225	11.266	7.67864	5.34282	2.10528	3.73826	1.16704	0.504349	7.80442	3.70346	1.73685	0.593779	5.80703	0	0
B0507.10	B0507.10	WBGene00015227	0	0	0	0	0	0	0	0	0	0	0	0	0	0	0	0	0	0	0	0	0	0	0	0	5.87029	0	0	0	0	0	0	0	0	0	0	0	0	0	0	0	0	0	0	0	0	0	0
B0507.11	srx-115	WBGene00006006	0	0	0	0	0	0	0	0	0	0	0	0	0	0	0	0	0	0	0	0	0	0	0	0	0	0	0	0	2.06279	0	0	0	0	0	0	0	0	0	0	0	0	0	0	0	0	0	0
B0507.15	B0507.15	WBGene00202499	0	0	0	0	0	0	0	0	0	0	0	0	0	0	0	0	0	0	0	0	0	0	0	0	0	0	0	0	0	0	0	0	0	0	0	0	0	0	0	0	0	0	0	0	0	0	0
B0507.2	B0507.2	WBGene00015219	4.06816	5.39628	10.8597	8.20533	8.12451	7.28407	7.58455	12.1601	12.0834	7.08001	9.93703	20.8879	18.8293	11.8035	14.1295	9.88847	16.3086	10.9146	12.7058	9.86364	20.9802	24.2576	14.3803	24.0104	11.8469	16.1423	15.9252	10.551	8.97095	7.81773	22.2449	11.9756	14.8895	15.0451	13.6056	15.1929	11.5321	14.8737	6.50105	19.239	11.2689	7.64011	10.6913	28.4064	8.19806	27.3931	15.5842
B0507.3	B0507.3	WBGene00015220	0	0	0	0	0	0	0	0.136293	0.385331	0	0	0	0	0	0	0	0	0	0	0	0	0	0	0	0	0	0	0	0	0	0	0	0	0	0	0	0	0	0	0	0	0	0	0	0	0	0
B0507.4	B0507.4	WBGene00015221	0	0	0	0	0	0	0	0	0	0	0	0	0	0	0	0	0	0	0	0	0	0	0	0	0	0	0	0	0	0	0	0	0	0	0	0	0	0	0	0	0	0	0	0	0	0	0
B0507.5	B0507.5	WBGene00015222	0	0	0	0	0	0	0	0	0	0	0	0	0	0	0	0	0	0	0	0	0	0	0	0	0	0	0	0	0	0	0	0	0	0	0	0	0	0	0	0	0	0	0	0	0	0	0
B0507.6	B0507.6	WBGene00015223	0	0	0	0	0	0	0	0	0	0	0	0	0	0	0	0	0	0	0	0	0	0	0	0	0	0	0	0	0	0	0	0	0	0	0	0	0	0	0	0	0	0	0	0	0	0	0
B0507.7	B0507.7	WBGene00015224	0	0	0	0	0	0	0	0	0	0	0	0	0	0	0	0	0	0	0	0	0	0	0	0	0	0	0	0	0	0	0	0	0	0	0	0	0	0	0	0	0	0	0	0	0	0	0
B0507.8	B0507.8	WBGene00015225	0	0	0	0	0	0	0	0	0	0	0	0	0	0	0	0	0	0	0	0	0	0	0	0	0	0	0	0	0	0	0	0	0	0	0	0	0	0	0	0	0	0	0	0	0	0	0
B0507.9	B0507.9	WBGene00015226	0	0	0	0	0	0	0	0	0	0	0	0	0	0	0	0	0	0	0	0	0	0	0	0	0	0	0	0	0	0	0	0	0	0	0	0	0	0	0	0	0	0	0	0	0	0	0
B0511.1	fkb-7	WBGene00001432	0	0	1.80887	0	0	0	0.315135	0.878765	1.09712	1.7765	3.25382	2.69827	0.72247	1.70174	1.61767	4.46861	3.89889	2.75486	4.33926	3.66778	1.04583	6.56702	4.30266	0.853508	0	5.69399	7.0819	13.0442	7.25773	2.51768	13.3186	9.65331	9.78982	8.04644	13.1691	15.4758	11.0352	13.2165	18.1048	10.0756	9.53661	14.1383	3.51162	1.76917	5.80703	8.78908	25.8413
B0511.10	eif-3.E	WBGene00001228	36.6851	38.5802	37.7853	56.5307	53.8008	55.1144	39.5001	132.703	124.848	127.186	118.358	99.6341	87.1912	131.14	144.298	121.599	135.638	134.782	126.657	125.344	111.622	139.51	143.312	87.8463	98.5046	96.6902	112.813	108.16	102.659	114.151	87.8573	80.6375	116.48	124.266	111.84	104.834	107.357	95.3848	118.37	128.595	69.8111	81.0554	103.512	82.6503	89.671	96.2579	103.412
B0511.11	B0511.11	WBGene00015236	0	0	0	0	0	0	0	2.64152	1.72449	1.66643	2.6218	2.69667	0.460292	0	1.39711	4.26847	0.974521	0.613973	1.50578	0	0	0.783866	1.85472	0	4.45478	7.01224	5.13327	2.07594	3.41542	2.68622	3.85611	2.36619	2.2031	6.2017	9.37474	0.378748	4.80515	0.405571	1.12482	2.64854	1.43941	1.91967	4.34575	9.18942	0	0	0
B0511.12	B0511.12	WBGene00015237	62.3296	61.1198	65.4811	55.384	76.1152	87.2444	57.0197	37.6748	39.9198	47.8827	42.6703	101.241	128.549	22.9135	20.6866	26.159	21.7295	28.6313	26.2901	28.0122	36.748	18.3086	55.9454	102.901	35.9885	48.7001	36.2954	43.586	32.9301	25.664	43.4578	36.6497	36.2623	37.055	56.3343	58.0983	50.3986	36.9593	31.0237	40.7166	46.5447	47.4537	100.356	94.4679	127.248	96.1459	94.5475
B0511.13	B0511.13	WBGene00015238	158.076	127.02	143.171	135.877	125.964	92.3591	81.2361	99.1277	108.184	127.536	123.862	130.432	132.417	28.6252	19.1448	25.9793	18.6977	31.9763	18.8644	28.3092	25.5829	40.2792	75.6772	145.336	27.2943	12.5411	13.5624	18.6184	7.9908	9.72937	14.2208	14.4009	12.5824	13.7513	15.9765	8.36032	23.567	10.0843	10.0176	15.7576	37.9833	32.1715	101.092	129.046	30.4072	25.7912	11.7547
B0511.17	B0511.17	WBGene00219234	0	0	0	0	0	0	0	0	0	0	0	0	0	0	0.587355	0	0	0	0	0	0	0	0	0	0	0	0	0	0	0	0	0	0	0	0	0	0	0	0	0	0	0	0	0	0	0	0
B0511.2	B0511.2	WBGene00015228	0	0	0	0	6.22531	3.29142	5.45626	4.02039	2.67768	3.29558	1.58001	1.51131	1.36468	12.438	4.94641	3.52222	3.9555	1.63473	2.72291	3.091	0	10.3254	6.13719	1.88563	15.5492	4.83047	3.88811	2.90347	6.18989	4.53165	4.94209	6.49585	3.82886	5.64252	4.59143	3.69736	6.48857	4.20752	2.89671	12.7048	11.2674	4.43619	1.87135	1.04759	6.1901	0	0
B0511.3	fbxa-125	WBGene00015229	0	0	0	0	0	0	0	0	0	0	0	0	0	0	0	0	0	0	0	0	0	0	0	0	0	0	0	0	0	0.76722	0	0	0	0.448663	0	0.819649	0	0	0	0	0	0	0	0	0	0	0
B0511.4	tag-344	WBGene00015230	0	0	0	0	0	0	0	0	0	0	0	0	0.460292	0	0	0	0	0	0.377722	0	0	0	0	0	0	0	0	0	0	0.839022	0	0.511496	0	0	0	0	1.91968	0	0	0	0.685921	0.237794	0	0	0	0	0
B0511.5	cutl-14	WBGene00015231	0	0	0	0	0	0	0	0.438158	0.359583	0	0	0.376627	0	0.843547	0	0.74606	1.12019	0.209321	0.671735	2.05249	0	0	1.19419	0	0	0	0.639352	2.22773	0	0	2.37166	0	1.06294	1.23206	4.21791	1.77112	0.809352	0	0	2.83789	0.811831	0.862175	0.626765	0.34911	0	0	3.68093
B0511.6	B0511.6	WBGene00015232	35.0692	39.4071	40.2113	48.4367	38.2002	66.9484	56.8227	86.899	88.6503	99.3193	87.8455	65.4964	63.1705	98.646	91.8908	93.5181	76.6045	95.2254	81.0068	94.9591	112.294	107.922	84.3432	58.4699	78.1208	104.111	124.075	131.983	123.677	136.207	117.034	112.18	104.463	132.957	107.96	117.075	132.494	144.619	153.905	152.267	144.9	124.879	95.5985	79.3749	208.966	114.307	174.015
B0511.7	B0511.7	WBGene00015233	20.3607	11.706	20.6759	22.0128	23.306	34.6547	33.1636	55.2075	57.0093	51.0239	47.9511	59.8529	47.1864	76.6786	73.3754	87.651	60.3165	76.9414	85.41	75.5361	40.9888	50.5387	94.7101	60.001	54.4899	49.5966	54.9723	30.3143	42.7264	61.2333	47.8152	56.882	55.344	54.8203	46.4691	42.5437	43.58	28.6304	29.4305	13.5014	58.3425	66.1576	89.5243	50.1856	30.1903	42.4344	34.3977
B0511.8	mrps-30	WBGene00044321	34.3761	20.4659	18.2502	11.4398	9.29887	6.03376	6.08676	1.85233	1.70388	1.54928	0.911369	2.85826	3.0962	0.787395	0.874624	0.74606	0.515653	1.80133	0.628859	1.66374	1.18386	2.72395	1.98485	0	0	4.44838	4.55464	9.87332	4.05887	4.55582	3.8424	2.98658	4.71601	7.15176	7.76165	6.48093	6.03683	9.854	8.10249	5.26148	2.81141	1.79029	6.35949	1.66447	40.3953	18.0582	9.0905
B0511.9	cdc-26	WBGene00015235	60.3041	43.7207	61.8429	74.0701	85.9465	90.7731	45.9618	82.3861	83.2502	104.267	99.3326	81.5374	69.7818	106.183	101.918	104.16	71.6384	95.1811	81.4496	79.6327	69.7756	105.79	83.0669	78.8583	97.1923	67.7446	63.7513	61.2493	84.8367	77.1156	55.4806	66.7696	67.0693	65.226	66.8194	64.9128	85.8551	71.2636	61.2578	39.747	68.2841	72.8209	67.3703	57.7113	106.839	106.615	64.6054
B0513.1	lin-66	WBGene00001562	16.2846	18.6651	26.912	15.2816	16.7336	1.40551	16.3136	7.03234	9.02209	4.76553	9.20665	5.2105	4.31692	21.2648	32.9317	14.5456	11.9778	18.1707	15.4771	14.6888	23.4979	11.1815	6.80551	9.55512	38.823	21.3702	24.155	36.406	38.2392	23.9629	26.7829	36.9259	26.7127	27.1296	14.8971	19.9992	19.9537	26.5286	21.3101	12.7549	17.2359	17.7855	8.48006	12.4921	17.4254	10.2851	12.1207
B0513.2	B0513.2	WBGene00007195	62.3296	53.8795	45.1559	87.8021	77.1381	59.3635	54.5117	125.69	132.81	148.14	130.94	105.925	98.6736	162.51	149.605	149.219	160.482	163.507	161.636	181.773	144.353	198.718	143.303	90.0084	159.648	132.4	118.038	111.35	118.912	148.549	159.437	124.561	125.452	152.018	127.513	119.055	149.451	90.1511	88.7379	64.3493	161.283	108.708	144.072	115.684	100.643	49.7553	61.7022
B0513.3	rpl-29	WBGene00004443	27.0268	31.7498	37.9693	34.761	46.1604	43.3139	27.4171	98.9033	104.08	134.731	101.562	78.7841	70.829	173.804	126.504	163.212	129.876	151.964	139.022	138.089	189.018	222.012	143.348	42.6802	266.267	196.667	261.753	255.679	241.783	240.353	245.788	227.519	227.994	244.351	238.35	229.634	216.428	250.497	195.339	222.532	265.819	235.31	166.115	97.8247	324.225	229.619	285.549
B0513.4	B0513.4	WBGene00007196	0	0	0	0	2.0746	0	0	0.143794	0.123597	0.271359	0	0.485098	0	0	0.587355	0	0	0	0	0	0	0	0	0	0	0.419519	0.643177	0	0	0	0	0	0	0	0.357944	0.593272	0	0	0	0	0	0.574563	0.626765	0	0	0	2.27284
B0513.5	B0513.5	WBGene00007197	0	0	0	0	0	2.50818	0	0.102904	0.654545	0.271359	0.257424	0	0.460292	0	0.404826	0	0	0.689729	0	1.0088	1.04583	0.783866	0	0	0	0.419519	0.596023	0	0	0	1.28505	1.83651	0	0	1.0707	0	0.333352	0	0	0	0.300779	0	0.626765	0	0	0	0
B0513.6	B0513.6	WBGene00007198	0	0	0	0	0	0	0	2.10826	3.46452	2.25067	3.47849	0.376627	0	0	3.96795	1.68414	1.60754	1.81612	0.706645	2.53889	1.96303	6.68716	3.9402	0	3.04036	2.26259	2.79112	1.02754	1.35263	3.62018	4.0408	3.77339	0.883361	3.19602	1.32032	1.07025	1.21874	5.59912	1.12482	0	3.38245	0.709512	0	0	0	0	0
B0513.9	B0513.9	WBGene00007200	0	0	0	0	0	0	0	0	0	0	0	0	0	0	0	0	0	0	0	0	0	0	0	0	0	0	0	0	0	0	0	0	0	0	0	0	0	0	0	0	0	0	0	0	0	0	0
B0523.1	kin-31	WBGene00002212	0	0	0	0	0	0	0	0.913074	0.670733	0.542784	0.560177	0.359305	0.72247	0	0	0	0	0	0.445441	0	0	0	0	0	0	0.419519	0.639352	0.894763	0	1.14071	0	0	0.839092	0	0	0	0.540871	1.0525	0	0	0.627574	0.710236	0	0.34911	0	0	0
B0523.3	pgl-2	WBGene00003993	32.601	55.6687	35.5761	29.652	31.3994	15.8311	11.4326	12.6207	11.7566	7.4291	3.84516	2.58581	6.94929	0.787395	1.46198	3.71857	1.46175	0.81373	0.737032	0.502594	0	2.40419	0.579929	3.98472	0	0.888768	3.10492	5.05531	3.84181	3.04892	1.28505	4.04003	4.74581	5.66112	0.953333	2.63001	0.604075	2.86498	0.68814	2.31514	4.49435	7.84326	3.27104	0.698306	6.1901	3.03728	1.68977
B0523.5	fli-1	WBGene00001443	25.0186	27.8676	10.7406	21.8291	47.2824	18.5056	13.0137	38.6428	35.3689	32.91	33.5863	17.1615	25.6295	54.3573	44.7847	49.8759	60.076	44.2303	41.1857	33.3751	22.6878	21.5992	32.8271	24.4452	51.3395	39.2901	30.9692	43.8031	40.2267	49.5278	27.2398	34.8823	38.5369	39.5482	26.9859	32.5915	41.9038	12.9764	21.1977	28.7016	28.0784	34.2742	34.8787	25.8182	48.2156	49.2506	67.9194
B0524.2	B0524.2	WBGene00015241	0	0	0	0	0	0	0	0	0	0	0	0	0	0	0	0	0	0	0	0	0	0	0	0	0	0	0	0	0	0	0	0	0	0	0	0	0	0	0	0	0	0	0	0	0	0	0
B0524.3	B0524.3	WBGene00015242	0	0	0	0	0	0	0	0	0	0	0	0	0	0	0	0	0	0	0	0	0	0	0	0	0	0	0	0	0	0	0	0	0	0	0	0	0	0	0	0	0	0	0	0	0	0	0
B0524.4	B0524.4	WBGene00015243	0	0	0	0	0	0	0	0	0	0	0	0	0	0	0	0	0	0	0	0	0	0	0	0	0	0	0	0	0	0	0	0	0	0	0	0	0	0	0	0	0	0	0	0	0	0	0
B0524.5	B0524.5	WBGene00015244	0	0	0	0	0	0	0	0	0.294962	0	0.364358	0	0	0	0	0	0	0	0	0.864842	0	0	1.24428	0	0	0	0	0	0	0.839022	0	0	0	0	0	0	0	0	0	0	0	0	0	0	0	0	0
B0524.6	B0524.6	WBGene00015245	0	5.31761	1.80887	2.52071	12.9503	11.3664	5.14113	1.09153	1.67444	3.06398	0	0.844404	6.29801	1.57498	0.587355	1.58421	0.515653	0.668999	1.06586	1.0191	0	0	1.5659	6.33906	0	1.49782	0	1.02754	2.06279	3.32268	0	1.83995	0.586827	0.915452	0.816637	0.443315	0.937428	0	0	0	0.749543	0.945	0.964121	5.27905	14.0051	2.07602	3.08471
B0545.1	tpa-1	WBGene00006599	0	0	0	0	0	0	0	0	0.245476	0	0.59378	0	0	0.970518	0	0.841967	1.63584	0	0.787389	0.492291	1.18386	0.783866	0	0	0	0	1.34164	2.14126	0	0	2.37166	1.46256	0.483701	2.09621	0.194083	0	0.228094	1.46845	3.41599	4.13601	1.05032	1.33462	0	0.721584	0	0	0
B0545.3	scl-23	WBGene00015246	0	0	0	0	0	0	0	0	0	0	0.431615	0	0	0	0	0	0	0	0.245617	0	0.9172	0	0.28603	0	0	0	0	0	0	1.53463	0	0	0.321055	0	0	0	0	0	0	1.32411	0	0.132087	0	0	0	0	0
B0545.4	B0545.4	WBGene00015247	0	0	0	0	0	0	0	0	0	0	0	0	0	0	0	0	0	0.317388	0.513063	0	0	0	0	0	0	0	0	0	0	0	0	0	0	1.50803	0	0.443315	0	0	0	0	2.74469	0	0	0	0	0	0
B0546.1	mai-2	WBGene00015248	507.096	446.263	494.956	500.576	492.826	417.327	515.334	509.399	521.86	570.249	513.813	469.461	312.148	467.439	532.839	515.027	587.072	523.889	534.611	503.407	428.424	468.669	451.684	442.782	304.21	279.327	232.293	253.602	350.05	312.605	296.199	271.049	309.283	312.893	243.364	254.481	330.716	237.631	199.982	195.757	360.91	319.629	344.295	248.928	117.061	143.19	104.637
B0546.2	B0546.2	WBGene00015249	120.686	121.304	137.724	89.9278	112.944	112.355	86.2258	145.805	145.961	112.399	153.635	115.901	94.5132	169.027	178.277	150.507	188.499	162.979	184.946	174.858	108.468	141.115	155.711	88.4375	78.0285	83.0267	51.1062	43.4653	51.2757	59.4991	96.8427	76.5222	76.2166	61.9989	66.636	50.5055	76.5163	46.404	26.7463	17.589	88.4777	73.1056	110.241	94.3421	28.3953	51.8714	42.7454
B0546.3	B0546.3	WBGene00015250	0	0	1.68133	0	0	0	0	0	0.182698	0.627422	0	0	0	0.91434	0	1.53807	0	0	0	0	0	0	0	0	0	0	0.639352	0	0	0	0	0.610073	0	0	1.0707	0.443315	0.581258	2.3334	0	0	0	0.574563	0	0	0	0	0
B0546.4	B0546.4	WBGene00015251	98.9622	81.8	122.662	78.5507	74.6533	74.026	44.3005	36.1914	39.6731	51.5288	32.6733	46.0502	36.6672	11.3878	22.4379	19.7035	27.109	17.7398	21.6419	23.8919	14.0166	26.2368	35.1879	54.5825	29.1486	23.1164	12.0449	7.39733	15.638	12.8911	14.4059	16.1108	15.9688	15.0242	14.7193	9.95614	15.0688	25.4707	14.5483	19.0404	9.36009	15.6702	21.2763	37.0457	23.6155	53.5822	35.4678
B0546.5	B0546.5	WBGene00015252	0	0	0	0	0	0	0	0.336427	0	0	0	0	0	1.88486	0.341031	0.74606	0.974551	0.285077	0.954179	0.492291	0	0.907762	0.28603	0	0	1.0783	1.05571	0	0	0	0	0	0.69527	0	0	0.391033	0	0	0.68814	0	0	0	0	0	0	0	0
B0547.1	csn-5	WBGene00000817	108.483	85.1683	94.6102	92.9602	97.6503	107.495	112.679	37.0536	33.233	56.6213	43.0215	79.2925	100.573	15.3359	26.2354	27.317	24.6897	26.4031	27.5708	25.1844	37.5521	43.4125	34.685	90.6182	52.8632	75.1516	48.131	51.9368	50.8106	35.8966	45.4444	65.6436	49.7465	50.4606	56.5739	62.4885	55.2862	76.3415	28.471	47.055	53.8868	60.9077	87.5827	119.138	210.1	179.233	182.509
B0547.2	B0547.2	WBGene00015253	0	0	0	0	0	0	0	0	0	0	0	0	0	0	0	0	0	0	0	0	0	0	0	0	0	0	0	0	0	0	0	0	0	0	0	0	0	0	0	0	0	0	0	0	0	0	0
B0547.4	srd-8	WBGene00005086	0	0	0	0	0	0	0	0	0	0	0	0	0	0.91434	0	0	0	0	0	0	0	0	0	0	0	0	0	0	0	0	0	0	0	0	0	0	0	0	0	0	0	0	0	0	0	0	0
B0554.1	B0554.1	WBGene00015254	0	0	0	0	0	0	0	0.291859	0	0	0	0	0	0	0	0	0	0	0	0	0	0	0	0	0	0	0	0	0	0	0	0	0	0	0	0	0	0	0	0	0	0	0	0	0	0	0
B0554.2	B0554.2	WBGene00015255	0	0	0	0	0	0	0	0	0	0	0	0	0	0	0	0	0	0	0	0	0	0	0	0	0	0	0	0	0	0	0	0	0	0	0	0	0	0	0	0	0	0	0	0	0	0	0
B0554.3	B0554.3	WBGene00015256	0	0	0	0	0	0	0	0	0	0	0	0	0	0	0	0	0	0	0	0	0	0	0	0	0	0	0	0	0	0	0	0	0	0	0	0	0	0	0	0	0	0	0	0	0	0	0
B0554.4	B0554.4	WBGene00015257	0	0	0	0	0	0	0	0.16076	0	0	0	0	0	0.91434	0.341031	0	0.515653	0	0	0	0	0	0	0	0	0	0	0	0	0	0	1.02312	0	0	0	0	0	0	0	0	0	0.237794	0	0	0	0	0
B0554.5	B0554.5	WBGene00015258	0	0	0	0	0	0	0	0	0	0	0	0	0	0	0	0	0	0	0	0	0	0	0	0	0	0	0	0	0	0	0	0	0	0	0	0	0	0	0	0	0	0	0	0	0	0	0
B0554.6	dod-20	WBGene00015259	0	0	0	0	0	0	0	0	0	0	0	0	0	0	0	0	0	0	0	0	0	0	0	0	0	0	0	0	0	0	0	0	0	0	0	0	0	0	0	0	0	0	0	0	0	0	0
B0554.7	B0554.7	WBGene00015260	0	0	0	0	0	0	0	0	0	0	0	0	0	0	0	0	0	0	0.295398	0	0	0	0.941198	0	0	0	0	0	0	1.39041	0	1.10695	0	1.19844	0.357944	1.65907	0.228094	2.10552	0	0	0.811831	1.89122	0	0	0	0	0
B0563.1	B0563.1	WBGene00015261	0	0	0	0	0	0.234108	0	8.72825	14.1902	6.61302	7.06465	0	0.262177	10.8949	21.3574	32.3983	9.06339	7.85616	6.71933	7.11027	1.04583	1.01287	1.98804	0.853508	17.1741	5.67573	1.34164	0	1.77902	0.76722	22.665	2.56951	1.50507	0.933692	1.46656	0.304604	7.21742	0.990855	1.16704	0.504349	4.05033	2.23146	0	0	6.1901	0	0
B0563.10	B0563.10	WBGene00077673	0	0	0	0	0	0	0	0.978483	0.856724	0	0	0	0	0	0.938418	0	0.974551	0	0	0	0	0	0	0	1.51999	0	0	0	1.75289	0	0	0	0.332891	0.466789	0	0.476979	0.300071	0	0	0	0	0	0	0	0	0	0
B0563.18	B0563.18	WBGene00206365	0	0	0	0	0	0	0	0	0	0	0	0	0	0	0	0	0	0	0	0	0	0	0	0	0	0	0	0	0	0	0	0	0	0	0	0.391033	0	0	0	0	0	0	0	0	0	0	0
B0563.2	tsp-11	WBGene00006637	0	0	0	0	0	0	0	0	0	0	0	0	0	0	0	0	0	0.628117	0	0	0	0	0	0	0	0	0	0	0	0	0	0	0	0	0	0	0	0	0	0	0.811831	2.29717	0	0	0	0	0
B0563.4	tmbi-4	WBGene00006479	17.1775	16.7744	30.4834	23.4051	19.8949	31.3145	23.545	21.1092	20.045	27.6352	40.156	36.5951	24.076	23.6472	25.775	27.4587	29.9554	18.636	25.0684	41.3932	28.4616	25.6988	44.1233	24.1264	21.0869	27.5855	45.5052	25.5854	15.5871	25.924	28.0684	26.9905	20.4576	17.7957	25.3572	29.7823	36.1514	35.0531	27.6925	16.5869	44.4368	39.5706	38.0832	21.6306	8.19806	40.0383	28.7545
B0563.5	B0563.5	WBGene00015262	0	0	0	0	0	0	0	0	0	0	0	0	0	0	0	0	0	0	0	0	0	0	0	0	0	0	0	0	0	0	0	0	0	0	0	0	0	0	0	0	0	0	0	0	0	0	0
B0563.6	B0563.6	WBGene00015263	0	0	0	0.263717	0	0.234108	0.315135	0.26249	0	0.921863	0.582125	0.376627	0	4.72726	4.7194	3.3691	1.60751	1.4056	1.63626	0	0	0	0	0	0	7.68902	1.43777	21.6173	0	15.5494	1.47037	5.0032	0.22485	6.34234	0.441986	13.998	0.456244	0	0	0.504349	0	0.472442	1.30156	0.34911	0	0	1.68977
B0563.7	B0563.7	WBGene00015264	0	0	0	0	0	0	0	0	0.123789	0	0	0	0	0	0	0	0	0	0	0	0	0	0	0	0	0	0	0	0	0	0	0	0.620231	0	0	0	0	0	0	0	0	0	0	0	0	0	0
B0563.8	B0563.8	WBGene00015265	0	0	0	0	0	0	0	1.05459	0.915986	1.861	0.728805	0.39626	0	4.62922	5.96632	16.9954	4.33596	9.7274	5.87414	12.4931	1.83462	0	1.31678	3.04202	46.0051	26.6305	51.8615	39.4383	79.9422	21.8479	44.2741	18.1297	42.2291	23.6265	45.8606	35.9841	35.513	14.5484	2.86749	2.61245	5.25534	8.31488	0	2.73708	18.5749	14.7612	7.27158
B0563.9	B0563.9	WBGene00044687	0	0	0	0	0	0	0	0.16076	0	0	0	0	0	0	0	0	0	0	0	0	0	0	0	0	0	0	0	0	0	0	0	0	0	0	0.413695	0	0	0	0	0	0	0	0	0	0	0	0
B0564.1	tin-9.2	WBGene00044083	176.351	246.005	215.52	149.868	158.603	150.575	144.027	65.8689	67.1305	59.2263	75.676	67.5332	60.6078	44.4904	37.6578	41.9992	37.304	48.3504	37.8633	49.4174	32.4739	47.8705	66.1209	59.6313	32.0715	30.7892	31.1851	27.4196	44.6335	49.5306	44.7911	23.8767	36.3658	38.0067	36.6954	31.1094	32.4221	17.2571	19.0541	58.028	41.184	27.7074	61.6496	61.8658	32.1953	16.8382	10.4986
B0564.10	unc-30	WBGene00006766	0	0	0	0	0	0	0	0.12722	1.13814	0.338864	1.55801	0	0.262177	4.24762	0.745857	4.86141	1.12019	12.2503	9.86392	3.23147	0	0	0.28603	0	26.1083	13.0824	10.5965	18.5782	10.3249	10.5585	5.40169	5.30115	22.3428	11.2196	208.607	196.34	9.53236	11.2766	12.6293	8.37255	11.1561	11.7661	8.40407	13.3981	0	0	2.27284
B0564.11	B0564.11	WBGene00023421	48.1501	30.2463	30.1651	43.0969	15.5622	27.307	22.266	46.4558	46.519	42.1035	41.4116	31.4309	24.3797	62.6472	58.7155	54.7121	54.2796	57.3587	52.8641	64.2463	43.475	59.7927	48.2193	24.3601	44.1518	17.7059	27.9681	19.8123	21.0818	21.5292	19.2538	17.3442	21.1589	23.4047	30.8533	29.7599	20.7738	27.1623	8.60671	16.1307	24.6512	27.9502	33.7007	17.2306	19.8135	16.4605	15.2822
B0564.2	B0564.2	WBGene00007202	2.03383	0	1.68133	8.55394	0	5.7996	0	7.02187	5.94446	3.57905	2.55588	1.2038	0.760021	3.62857	4.94641	6.25368	5.38998	5.4397	4.2091	1.68795	3.93613	4.0249	0.756571	0.557906	2.93478	4.41998	5.78252	2.14126	0	2.81896	2.57042	3.07774	2.97228	3.08361	1.81339	2.58554	3.24251	2.93727	0.562342	0	0.627574	0.313154	0	2.73708	8.19806	3.03728	1.39494
B0564.3	B0564.3	WBGene00007203	0	0	0	0	0	0	0	0.249548	0	0	0.291027	0	0	0	0	0	0	0	0.33084	0	0	0	0	0	0	0	0	0	0	0	0	0	0.615065	0	4.28746	5.35805	0	0	0	0	0	0.319305	0	0	0	0	0
B0564.4	B0564.4	WBGene00007204	0	0	0	0	0	0	0	0	0	0	0	0	0	0	0	0	0	0	0.33084	0	0	0	0	0	3.37094	0	0	0	0	0	0	0	0.332891	0	13.4352	4.40547	0	0	1.16704	0	0	0	0	0	0	0	0
B0564.6	B0564.6	WBGene00007206	0	0	0	0	0	0	0	0	0	0	0	0	0	0	0	0	0	0	0	0	0	0	0	0	0	0	0	0	0	0	0	0	0	0	1.9399	0.304604	0	0	0	0	0	0	0	0	0	0	0
B0564.7	B0564.7	WBGene00007207	58.2796	39.8019	38.5527	34.5901	14.8743	31.456	46.8935	7.00612	6.48993	15.6581	8.98401	46.8744	47.2447	6.54054	2.02549	2.42618	2.6106	6.1582	4.51476	3.38179	3.55244	7.08374	20.4445	45.8613	8.91064	9.97918	10.6807	13.2278	13.0072	6.59431	2.94111	6.2103	9.47959	8.09	4.13573	15.4921	7.79989	10.7656	3.76537	5.42396	11.8752	16.8543	37.6255	62.4886	20.5798	19.3464	12.1339
B0564.9	B0564.9	WBGene00007208	0	0	0	0	0	0	0	0	0	0	0	0	0	0	0	0	0	0	0	0	0	0	0	0	0	0	0	0	0	0	0	0	0	0	2.49197	0.304604	0	0	0	0	0	0	0	0	0	0	0
BE0003N10.1	BE0003N10.1	WBGene00015266	30.5597	29.1786	32.8327	19.0056	15.5242	12.7723	19.8214	4.27824	4.38798	3.43007	3.88635	13.1048	11.3965	0.91434	1.6107	2.88022	2.46472	0.81373	1.28957	1.67404	0	1.56792	3.04905	12.1662	2.93478	1.66676	0	0	5.41248	0	0	2.65681	2.23479	4.40208	0.194083	0.897877	1.06032	2.61373	2.98651	0.801719	2.43609	3.79262	6.19323	9.45412	0	3.67578	6.82018
BE0003N10.2	chin-1	WBGene00015267	71.457	76.5037	84.1632	36.9518	49.9468	49.4198	32.7987	11.0358	13.9944	22.4332	18.0331	39.4737	38.4766	4.35955	1.74644	2.18011	1.60751	1.76045	1.13878	2.5528	2.10106	0.783866	14.4851	62.6983	6.0822	3.23914	9.11601	2.81728	7.59077	3.02119	1.8028	8.74727	6.09875	9.33484	8.2665	7.85189	4.61463	12.4397	6.8862	10.3551	8.45568	5.50134	22.2547	58.8653	18.1888	15.6596	16.9457
BE0003N10.3	BE0003N10.3	WBGene00015268	6.10298	3.51816	1.81653	5.14133	6.72346	0	9.27876	1.34361	0.247224	0.650504	1.13942	1.15192	1.60678	2.67225	1.2695	0	0	0.72901	2.19702	1.67404	1.18386	0	0.28603	7.4962	0	3.34115	0	1.03784	0	1.39041	4.31472	3.07172	3.51909	0.851308	1.15443	0.304604	2.5531	0.405571	2.87441	1.00882	1.20356	1.18348	3.78149	1.66447	0	0	0
BE10.1	BE10.1	WBGene00007209	0	0	0	0	0	0	0	0	0.182698	0	0	0	0	0	0	0	0	0	0.2565	0	0	0	0	0	0	0	0	0	0	0	0	0	0	0	0	0	0	0	0	0	0	0	0	0	0	0	0
BE10.2	agmo-1	WBGene00007210	0	1.12418	0	0	0	0	0	0	0.521428	0.311639	0	0	0	1.6873	0.938418	0.841967	0	0.494398	0.295398	0	1.83462	2.02599	0	0	1.51999	0.888768	0.639352	1.03784	3.41542	0	1.28505	0	0.223847	0	0.552027	2.22994	0.333352	0	0	0	0	0	0	0	0	0	1.39494
BE10.3	BE10.3	WBGene00007211	0	0	0	0	0	0	0	0	0.572411	0	0	0	0	2.72867	0.587355	2.22988	0.632987	0	0	0.516505	0	4.60729	0.694718	0	0	2.57637	0.639352	2.06538	0	1.39041	0	1.24106	1.00591	1.04891	1.97203	0.304604	0.861518	0	1.68744	1.32411	1.11261	0.445241	0.936157	0	5.80703	7.82833	0
BE10.4	BE10.4	WBGene00007212	0	1.50734	0	0.263717	0	0	3.82249	1.56439	1.59491	1.25078	1.1659	0.39626	0	0.970518	1.9422	2.22988	1.78178	1.69016	3.0433	0.864842	1.04583	3.82323	3.08485	0	7.82572	1.3215	1.2392	3.84507	1.35263	2.2817	0.90129	2.55043	2.75806	0.995866	2.09432	0.868012	0.768965	2.68576	3.18975	1.62148	4.61646	1.20871	0.626765	0	0	6.22959	0
BE10.5	BE10.5	WBGene00044127	0	0	0	0	0	0	0	2.03787	0.51489	0	1.44362	0	0.262177	2.72867	0.938418	0.841967	2.00598	1.17302	1.3697	3.0475	6.80841	5.10888	1.89953	0	0	2.26259	3.32895	5.25555	5.5947	4.71309	2.94111	5.51195	4.94948	2.79604	6.32022	6.22922	4.32258	7.65286	7.0093	6.05627	1.37201	3.69539	0	0	6.1901	3.67578	0
C01A2.1	C01A2.1	WBGene00007213	0	0	0	0	0	0	0	0	0.249654	0.623355	0	0	0	0.970518	1.21574	0	0.515653	0	2.21338	2.01411	0.9172	2.7045	0.28603	0	5.87029	6.3081	3.01244	5.14949	1.77902	3.12072	5.12745	6.02031	3.12216	4.57728	7.47047	4.92336	2.2086	10.5463	6.39429	9.67821	4.02457	5.93941	0.936157	0.34911	8.19806	8.68587	3.08471
C01A2.2	C01A2.2	WBGene00007214	0	1.26952	0	0.263717	0	2.74229	0	0.891352	0.748782	2.25357	0.582125	0	0	0	1.4919	0.792007	0	0	0.2565	1.17145	0	0	1.22636	0	1.51999	0	2.46909	0	1.77902	1.53463	4.12972	0.910325	1.61337	0	1.37952	0.609283	0.228094	0.405571	1.68744	0	1.53378	0	1.25368	1.28804	8.19806	0	0
C01A2.3	C01A2.3	WBGene00007215	15.9943	18.5757	8.94113	15.7921	6.22531	6.11537	5.14113	0.818924	1.76001	0.650504	1.06205	1.65434	2.44724	0	0	0.74606	0.974551	0	0.426117	0	0	2.80986	2.31234	3.89553	0	5.80854	1.82973	1.11373	0	0.839022	2.70453	3.06193	1.17627	0.637211	0.388213	2.06214	3.69623	3.92812	0	2.4959	2.43609	1.46857	4.68051	2.48672	0	8.68587	2.28599
C01A2.4	C01A2.4	WBGene00007216	14.2473	13.2542	17.6857	25.4588	31.6205	22.1059	24.5129	53.5244	45.517	43.143	58.8293	48.8926	61.1538	49.2667	62.4894	54.2637	50.7063	44.2757	49.2271	47.6485	28.4789	47.3864	48.2652	48.3993	24.4579	23.1969	11.9794	17.7796	20.0636	17.5495	25.1484	22.2104	18.9201	20.3416	19.2706	19.7566	18.6056	13.9867	16.5197	6.44397	21.1169	17.3866	45.3183	27.2338	6.1901	12.8405	16.6571
C01A2.5	C01A2.5	WBGene00007217	68.4123	88.7776	72.1954	58.6598	94.4284	97.3726	93.2378	78.4578	85.079	75.5467	82.3598	74.2168	76.9597	111.412	85.5627	109.492	77.5969	106.392	112.091	60.7813	94.3171	83.6293	73.7543	55.7952	98.9426	102.247	95.6035	69.6271	98.3905	88.4682	90.1741	95.8303	83.3489	85.6909	91.6449	93.8055	79.6957	79.5094	63.9948	93.1549	105.605	73.517	103.449	52.7966	98.0566	116.808	62.8177
C01A2.6	C01A2.6	WBGene00007218	0	0	0	0	0	0	0	0	0	0	0	0	0	0	0.682146	0	0	0	0	0	0	0	0	0	0	0	0	1.11373	0	0	0	0	0	0	0	0	0	0	1.13811	1.32411	0	0	0	0	0	0	0
C01A2.7	nlp-38	WBGene00007219	0	0	0	0	0	0	3.82249	0.186066	0.685406	0.921863	0	0.485098	0	0	0.533593	1.19196	0.487201	0.772525	1.41867	1.68795	0.9172	1.01287	0.622063	0.942699	0	1.1843	1.88253	6.51186	2.70558	4.74772	2.37166	0	3.3519	0.96379	0.762817	1.59359	1.49601	1.33743	2.98	1.81054	3.03772	0.445241	0	0	0	4.53332	10.7959
C01A2.9	C01A2.9	WBGene00077546	0	0	0	0	0	0	0	0.16076	0.112359	0.623355	0	0.485098	0	0.843547	0	0	0.515653	0	0	0	0	1.62032	0.572129	0	3.37094	0.419519	1.65173	0	0	0	0	1.10695	0.321055	0.780065	0.357944	0	0	0	11.3306	7.90274	0	0.319305	0	0.698306	0	0	0
C01B10.10	C01B10.10	WBGene00015284	0	0	0	0	0	0	0	0	0	0	0.289588	0	0	0	0	0	0	0	0	1.17145	0	0	0	0	0	0	0	0	0	0	0	0	0	0	0	0	0	0	0	0	0	0	0	0	0	0	0
C01B10.11	C01B10.11	WBGene00044294	0	0	0	0	0	0	0	0	0	0.311639	0.257424	0	0	0	0	0	0	0	0	1.17145	1.04583	0	0	0	0	0	0	0	0	0	0	0	0.223847	0	0	0.304604	0	0	0	0	0	0	0	1.04759	0	0	0
C01B10.3	C01B10.3	WBGene00015278	0	0	0	0	0	0	0	0	0.617664	0.271359	0.257424	0.485098	0	0	1.21284	0	0.632987	0.202301	0	0	0	0	0	0	0	0	0	0	0	0	0	0	0	0	0	0	0	0	0	0	0	0	0	0	0	0	0
C01B10.4	C01B10.4	WBGene00015279	0	0	0	0	0	0	0	0	0	0	0	0	0	0	0	0	0	0.285077	0	0	0	0	0	0	0	0	0	0	0	0	0	0	0.327975	0	0	0	0	0	0.568984	5.7216	0	0	0	0	0	0	0
C01B10.44	C01B10.44	WBGene00194839	0	0	0	0	0	0	0	0	0	0	0	0	0	0	0	0	0	0	0	0	0	0	0	0	0	0	0	0	0	0	0	0	0	0	0	0	0	0	0	0	0	0	0	0	0	0	0
C01B10.5	hil-7	WBGene00001858	0	0	0	0	0	0	0	0	0.294962	0	0	0	0	0	0	1.43787	0	0	0	0	1.04583	1.01287	0	0	4.56109	4.72581	4.50554	0	3.55847	0	3.93096	2.01728	0.64903	0	1.1753	0	0	0.405571	0.568984	0	2.82506	0.574563	0.674795	2.73708	28.3953	0	14.4654
C01B10.6	C01B10.6	WBGene00015280	0	0	0	0	0	0	0	0	0	0	0	0	0	0	0	0	0	0	0	0	0	0	0	0	0	0	0	0	0	0	0	0	0	0	0	0	0	0	0	0	0	0	0	0	0	0	0
C01B10.7	C01B10.7	WBGene00015281	0	0	0	0	0	0	0	0	0	0	0	0	0	0	0	0	0	0	0	0	0	0	0	0	0	0	0.596023	0	0	0	0	0	0	0	0	0	0	0	0	0	0	0.132087	0	0	0	0	0
C01B10.8	C01B10.8	WBGene00015282	158.076	183.033	154.375	212.078	166.128	131.944	190.407	51.3895	47.0753	25.1075	18.7846	48.5116	65.6614	5.21839	8.69749	4.61533	7.54266	3.91449	9.0103	4.56823	1.83462	1.01287	15.5533	86.9598	2.93478	1.96706	0	0	0	3.06866	0	1.10695	2.39178	1.01453	1.21978	2.8191	3.11245	1.98195	3.52725	0.801719	0.749543	3.04483	10.5166	28.2668	8.19806	7.5706	9.34742
C01B10.9	C01B10.9	WBGene00015283	17.998	11.1781	13.1757	31.4384	16.9241	24.8504	5.36778	30.4174	28.0092	26.0479	19.0131	19.4008	15.9131	14.789	13.7705	12.6513	23.1737	16.477	11.6996	8.93673	7.87457	12.2234	31.2035	28.5793	8.8065	4.44253	3.61824	4.82621	5.28522	1.90793	3.74564	2.06937	4.86241	4.81316	2.37813	5.17869	2.384	8.30512	4.32135	4.75676	7.21365	9.16947	27.5377	18.376	16.3981	10.6086	7.06088
C01B12.1	sqt-2	WBGene00005017	0	0	0	0.527499	0	0	0	0.476951	0	0.271359	0.302753	0	0	0.843547	0	0	0.515653	0.604409	0	0	1.04583	0	0.28603	0	0	0.419519	0.543223	0	0	0	0	0	0.365595	0	0.495867	0	0	0	0.568984	0.819757	0	1.72456	0	1.04759	0	3.67578	1.39494
C01B12.2	gmeb-1	WBGene00015285	23.0115	15.9945	23.3047	14.6117	16.0593	24.624	10.7733	10.8394	9.34631	10.1782	9.12292	7.80223	4.74615	52.3025	28.7203	16.0361	18.2389	5.97469	6.56049	3.18556	18.3699	16.7508	11.2926	1.70722	40.1232	42.0861	6.5189	13.6739	15.7426	10.5424	54.7536	44.7663	10.2751	8.88134	13.7157	4.38788	13.3677	9.15269	11.465	20.7462	18.6259	30.2513	7.36976	14.0138	56.4197	43.1226	36.9066
C01B12.3	C01B12.3	WBGene00015286	0	0	0	0	0	0	0	0.143794	0	0.311639	0.257424	0	0	0	0	0	0	0	0	0	0	0	0	0	0	0	0	0	0	0	0	0	0	0	0	0	0	0	0	0	1.43941	0	0	0	0	3.03728	0
C01B12.4	C01B12.4	WBGene00015287	0	0	0	0	0	0	0	0	0	0	0	0	0	0	0	0	0	0	0	0	0	0	0	0	0	0	0	0	0	0	0	0.910325	0	0	0	0	0	0	0	0	0	0	0	0	0	0	0
C01B12.5	C01B12.5	WBGene00015288	0	0	0	0	0	0	0	0	0	0	0	0	0	0	0	0	0	0	0	0	0	0	0	0	0	0	0	0	0	0	0	0	0	0.448663	0	0	0	0	0	0	0	0	0	0	0	0	0
C01B12.8	C01B12.8	WBGene00015291	71.4812	89.0488	47.4971	42.9941	31.9348	28.2219	47.572	51.6533	59.3879	61.4283	60.1471	53.1343	54.3791	27.5031	20.2238	28.5646	21.8339	26.4407	20.3352	13.5105	12.2096	23.3921	27.3744	69.729	10.8668	13.7654	15.8275	16.3921	18.9065	22.8298	9.73145	21.6521	20.2474	22.454	24.1288	23.2932	14.2949	16.1829	10.1914	11.4098	14.7126	11.6624	32.6294	59.3098	23.9972	37.1594	42.691
C01B4.1	str-257	WBGene00006283	0	0	0	0	0	0	0	0	0	0.338864	0	0	0	0.970518	0	0.792007	0	0.689729	0	0	0	0	0	0	0	0	0	0	1.75289	0	0	0	0	0	0	0.460697	0.333352	0	0.568984	0	0	0	0	0	0	0	0
C01B4.10	str-76	WBGene00006136	0	0	0	0	0	0	0	0	0	0.650504	0.291027	0	0	8.89596	0.80975	5.22625	1.00285	1.81247	0.491294	2.03629	0	0	0	0	0	0.764779	0	0	0	0	1.47037	0	0.279629	0.615118	0	0	0	0	0	0	0	0	0	0	0	0	0
C01B4.3	str-258	WBGene00006284	0	0	0	0	0	0	0	0	0	0	0	0	0	0	0	0	0	0.202301	0.445441	1.17145	0	0	0	0	0	0	0	0	0	0	0	0	0	1.15479	0	0	0.666786	0	0	0	0	0	0	0	0	0	0
C01B4.5	srd-61	WBGene00005138	0	0	0	0	0	0	0	0.326081	0.385331	0	0.257424	0.376627	1.00881	1.63094	0.928387	0.595905	1.12019	0.494398	0.530889	2.01111	2.09192	0	0.408688	0	0	2.08628	1.08658	0	2.06279	3.32268	1.47037	1.22029	2.45476	1.66991	0.357944	1.27662	1.99483	2.91371	1.37645	0.504349	2.43609	1.36951	0.936157	0	0	2.07602	2.27284
C01B4.6	C01B4.6	WBGene00015270	4.06816	6.3507	3.63351	12.6843	11.0646	5.55605	9.56003	29.9991	33.9756	25.8095	32.1626	24.93	28.6723	14.8725	17.2088	16.8551	11.0699	11.3302	12.8741	21.2782	7.86402	14.4433	38.872	34.8772	11.7434	26.8489	17.7832	26.4801	16.5211	18.3807	26.5348	15.7168	18.5091	15.7921	20.1285	21.8315	21.4186	17.0452	17.0943	26.2322	22.0063	15.6726	23.3516	43.1359	38.0051	33.7881	54.6827
C01B4.7	C01B4.7	WBGene00015271	0	0	0	0	0	0	0	0.82765	0.529216	0.854424	0.289588	0.39626	0	0	1.61767	0	0.974551	0.209321	0.235491	1.7299	0	0	1.03075	3.98472	0	0	0	0	0	0	0.90129	0	0.327975	0.280663	0.495867	1.72663	0	0	0	1.00882	0	0.237794	0.761264	2.41417	0	0	1.68977
C01B4.8	C01B4.8	WBGene00015272	0	0	0	0	0	0	0	0	0	0	0	0	0	0	0	2.33027	0	0.418694	0.823163	0.864842	0	3.24103	0	0	0	1.98028	0.798415	0	0	0	0	0.610073	0.8825	0.637211	2.11761	1.81306	0.604075	1.21701	0.68814	1.00882	1.7535	0.132087	0	0.593779	0	2.07602	0
C01B4.9	C01B4.9	WBGene00015273	0	0	0	0	0	0	0	0	0.182698	0.623355	0	0	0	0	0	0	0	0	0	1.68795	0	0	0	0	0	0	0	0	0	0	0	0	0	0	0	0	0	0	0	0	0	0	0	0	0	0	0
C01B7.1	ztf-12	WBGene00015274	7.98932	1.12418	9.05038	12.6206	2.41908	6.7366	13.4383	7.27629	7.52905	7.47877	5.1687	7.10074	4.0584	5.14714	6.8116	13.7375	7.17171	13.8509	8.09145	7.20446	5.10207	4.60729	10.0592	15.0653	0	3.92954	7.55454	20.9629	0	6.83752	12.3865	6.68958	7.74571	15.6943	2.29005	7.12591	1.38195	4.80141	2.84631	4.30668	3.02788	4.58659	2.44887	5.20462	0	9.06775	1.39494
C01B7.3	C01B7.3	WBGene00015275	0	0	0	0	0	0.234108	0	0	0	0	0	0	0	0	0	0	0	0	0	0	0	0	0	0	0	0	0	0	0	0	0	0	0	0	0	0	0	0	0	0	0	0	0	0	0	0	0
C01B7.4	tag-117	WBGene00006467	0.997811	0	3.61818	0.791346	3.28399	3.52559	1.89196	2.843	2.94913	3.65131	2.80967	5.34172	1.44512	0	1.21284	2.23873	1.46196	4.05506	1.28893	2.38666	0	1.81574	3.37997	1.79621	3.37094	0	3.86875	8.33331	2.70558	0.839022	0	10.33	2.29123	9.1082	3.3859	3.30249	2.90771	2.02884	0.562342	0.504349	0	2.98145	2.50798	4.89038	0	0	8.74468
C01B7.5	C01B7.5	WBGene00015276	0	0	0	0	0	0	0	0	0.123789	0	0	0	0	0	0	0	0	0	0	0	0	0	0	0	0	0	0	0	0	0	0	0	0	0	0	0	0	0	0	0	0	0	0	0	0	0	0
C01B7.6	rpm-1	WBGene00004457	3.43383	9.96298	9.18562	0.791346	6.72346	6.7366	0	2.51109	1.20753	3.33028	2.50369	6.09244	3.17096	0.91434	0	1.38791	1.26613	1.04648	1.39303	2.34318	2.09192	0	1.16	0.853508	0	0	1.99061	0.894763	1.35263	2.2817	1.47037	0.511496	0.844079	0.939638	0.689758	0.460697	0.357222	0.405571	0	0.504349	0.627574	1.39948	0.761264	0	0	0	10.5422
C01B7.7	C01B7.7	WBGene00015277	0	0	0	0	0	0	0	0	0	0	0	0	0	0	0	0	0	0	0	0	0	0	0	0	0	0	0	0	0	1.14071	0	0	0	0	0.291736	0	0	0	0	0	0	0	0	0	0	0	0
C01B9.1	C01B9.1	WBGene00007220	0	0	0	0	0	0	0	0.203486	0.123789	0.623355	0	0	0	0	0.341031	0	0	0	0.75868	0.984703	0	5.06684	0	0	3.37094	0	0	0	0	0	0	0.511496	0.258851	0.448663	0	0.921507	0	0	1.12482	0	0	0.132087	0	0	0	0	0
C01B9.4	C01B9.4	WBGene00194890	0	0	0	0	0	0	0	0	0	0	0.289588	0	0	0	0	0	0	0	0	0	0	0	0	0	1.51999	1.0783	0	0	0	2.51768	1.8028	1.71702	0.332311	0	0.661598	0	2.18554	1.8021	2.06493	2.12583	2.13541	0.945	0	0	0	2.07602	1.39494
C01C10.1	clc-2	WBGene00000523	2.03383	1.26952	0	2.62062	2.0746	0	0.315135	1.13326	1.12589	1.88823	1.84165	2.39287	2.5277	0.970518	0.874624	1.34197	0	0	0	0	0	0	4.03653	0.853508	0	0	0	0	0	0	0	0.72956	0	0.380654	0.875421	0.89377	0	0	0	0	0.601632	0.472442	0.964121	0	0	2.07602	0
C01C10.2	C01C10.2	WBGene00015294	0	0	0	0	0	0	0	0	0	0	0	0	0	0.91434	0	0	0	0	0	0	0	0	0	0	0	0	0	0	0	0	0	0	0	0	0	0	0.228094	0	0.568984	0	0.902559	0	0.626765	0	0	0	0
C01C10.3	acl-12	WBGene00015295	0.997811	2.3937	5.31484	1.31923	1.20939	3.21068	6.34573	3.69751	2.87014	3.1559	3.32765	4.13418	4.88216	6.87968	1.2695	1.68414	2.12316	3.3451	0.2565	11.1411	1.96303	2.93376	3.23087	3.59993	0	0	1.43777	9.98626	2.06279	5.81771	0	2.68285	3.12265	2.42136	8.85972	3.66135	5.34349	8.49524	3.65322	8.05554	8.95564	2.91011	5.27725	4.69949	0	0	0
C01C10.4	clc-5	WBGene00000526	0	1.26952	0	0	1.20939	0.468274	0	0.398317	1.18807	0.881649	0.364358	1.54596	2.83389	0	0	0	0	0.209321	0	0	0	0	0.28603	5.69194	0	0	0	0	0	0	0	0	0	0	0.492828	0	0	0	0	0	0.627574	0	0	0.34911	0	0	0
C01C4.1	nlp-1	WBGene00003739	0	0	0	0	0	0	0	0	0	0	0	0	0	0	0	0	0	0	0	0	0	0.907762	0	0	0	1.0783	0	2.68494	0	0	0	0	0.332311	0	0.247903	0	0	0	0	0.504349	0	0.319305	0	0	0	0	0
C01C4.2	C01C4.2	WBGene00015292	0	0	0	0	0	0	0	0	0	0	0	0	0	0	0	0	0	0	0	0	0	0	0	0	0	0	0	0	0	0	0	0	0	0	0	0	0	0	0	0	0	0	0	0	0	0	0
C01C4.3	C01C4.3	WBGene00015293	0	0	0	0	0	0	0	0	0	0	0	0	0	0	0	0	0	0.855441	0.787389	0	0	1.01287	0	0	0	1.0783	5.08993	2.14126	0	0.76722	1.5593	0	0.448697	0.895781	0.582391	4.49962	0	0	0	1.67614	0	0.319305	0	0	0	0	0
C01C7.1	ark-1	WBGene00000186	43.1274	45.9943	35.0302	30.9714	27.1186	41.6545	24.83	12.5402	16.5157	12.5181	10.9237	22.5993	25.78	4.48725	7.27175	4.6649	7.22835	7.69662	3.9719	17.303	6.03815	2.02599	4.68139	22.9285	1.51999	3.46944	0.543223	8.60726	4.4846	2.44547	2.46059	15.6717	4.68497	3.72082	4.3712	9.91256	15.3461	16.4394	13.3699	18.4704	11.7764	13.1821	19.1954	16.1887	22.5882	9.42847	3.68093
C01F1.1	C01F1.1	WBGene00015296	124.981	120.447	114.105	141.376	136.233	142.075	139.825	154.382	168.727	154.824	137.24	124.233	108.222	163.268	168.533	174.962	194.177	155.154	152.491	125.848	87.0889	145.058	141.749	141.084	144.821	183.621	108.047	94.3036	172.479	143.327	139.229	115.237	145.946	124.763	148.706	131.648	144.869	141.888	108.551	127.674	123.123	131.378	134.757	121.418	111.03	105.99	99.8199
C01F1.2	sco-1	WBGene00015297	65.3866	73.5325	96.3926	32.7072	19.6937	42.037	66.155	4.80338	5.19292	9.81412	8.15763	10.1782	20.7594	7.94748	4.54119	9.58102	1.00285	3.5796	5.96205	4.38864	6.57179	10.9716	4.95937	17.5302	12.3879	14.0679	10.694	15.742	11.1235	14.839	16.0327	23.0494	15.8114	14.1359	14.6513	10.2826	17.8502	26.3208	20.2742	23.6688	12.8055	6.2529	14.1853	10.9811	17.8056	10.2279	16.6983
C01F1.3	C01F1.3	WBGene00015298	0	0	0	0	0	0	0	0	0.112359	0	0	0	0	0.91434	0	0	0	0	0.245617	0	0	0	0	0	2.93478	3.67738	0	0.894763	0	0.839022	1.28505	1.22029	0.504479	0	0.495867	1.23457	0	1.45807	0	0.504349	0.766797	0	0	0	16.3981	6.60935	1.39494
C01F1.4	C01F1.4	WBGene00015299	0	0	0	2.88434	0	0	0.315135	0.513658	0.123789	0	0.863335	0	1.22681	0.843547	0.587355	0	0	0.209321	0	0	0	0	0	0	0	0	0	0	0	0	0	0	0	0	0	0	0	0	0	0	0	0	0	0.694262	0	0	0
C01F1.5	C01F1.5	WBGene00015300	0	0	0	0	0	0	0	0	0	0	0	0	0	0	0	0	0	0	0	0	0	0	0	0	0	0	0	0	0	0	0	0	0	0	0	0	0	0	0	0	0	0	0.761264	0	0	0	0
C01F1.6	C01F1.6	WBGene00015301	15.9943	12.5934	21.9841	18.2912	21.8144	45.5964	51.7544	7.1324	8.97226	6.69013	11.0004	76.6521	124.634	1.6873	1.6107	1.19196	1.63584	2.77072	2.44841	5.70099	3.01848	8.46227	11.9761	128.672	17.719	8.97361	7.09759	5.6563	11.5013	7.26787	5.79371	5.17123	11.9382	7.79434	11.3419	8.97783	11.9778	9.39209	11.1079	7.91287	11.3824	6.05454	60.0782	126.673	47.2004	18.6969	11.6203
C01F4.2	rga-6	WBGene00015303	0	0	0	0	0	0	0	0	1.06796	0	0.51491	2.58524	0	0.843547	0	0	2.18032	1.30733	1.63978	0.984703	28.99	33.1885	1.22636	0.557906	0	1.74112	3.52703	1.9223	0	3.95995	1.5593	2.76145	2.26189	1.36422	2.66774	4.70422	2.32588	5.67706	176.391	82.2361	3.6246	3.46211	2.2099	7.97755	0	4.53332	0
C01F6.1	cpna-3	WBGene00007221	32.601	59.2258	47.1264	52.3271	43.7337	79.4271	61.6066	82.0335	88.8707	69.6326	64.2921	93.9458	77.9347	35.5819	37.0213	41.6802	40.0543	29.3295	36.5087	19.2894	14.4514	13.0175	69.1361	86.8464	6.30572	8.05577	8.68799	8.00583	10.3636	7.05273	7.50005	10.232	9.25505	6.76762	13.8166	7.83111	11.3752	6.80824	2.86085	6.81326	8.18028	16.5916	66.9217	79.3371	5.80703	2.07602	0
C01F6.14	C01F6.14	WBGene00219207	0	0	1.80887	2.62062	0	0	0	1.92738	0.748841	1.23765	2.05547	2.44236	0.262177	0.843547	0.928387	4.22269	1.14864	3.23579	3.62641	3.39558	0	5.91219	6.05873	0	7.93203	13.5298	7.69959	11.198	5.83788	2.81896	4.89154	6.02031	8.45437	5.53842	11.3067	10.6766	6.02663	8.4643	4.20199	2.91009	8.5327	5.94265	3.12623	0.34911	8.19806	27.9751	21.5182
C01F6.2	C01F6.2	WBGene00007222	0	2.53935	0	0	1.20939	0.468274	0	1.15112	0.716215	0.966286	1.83327	0.39626	0.766522	0	1.7625	0	0	0	0	0	1.83462	0	0.28603	0	0	0.419519	0	0	0	0	0	0	0	0	0	0	1.80153	0	0.568984	0	0	0	0	0.34911	0	0	5.1279
C01F6.4	fem-3	WBGene00001413	116.728	109.73	92.6307	123.867	107.218	97.2176	92.9698	84.0991	81.5158	76.6947	54.2957	66.7044	70.8159	17.7005	16.8764	17.4243	13.8328	26.7799	16.283	33.0332	5.11041	11.612	59.9787	46.6558	5.97514	7.23234	3.97228	4.13126	6.66398	4.33959	6.78494	6.83394	4.81044	2.07239	6.66147	5.44914	7.34603	4.20752	7.83095	3.14558	4.11402	13.2517	54.0327	31.9055	0	10.6086	1.68977
C01F6.5	aly-1	WBGene00000120	14.9928	20.1668	31.0509	15.2816	16.2363	30.5005	16.3136	125.287	127.506	139.371	191.631	73.7282	34.5592	338.234	326.256	423.516	290.095	309.534	345.652	325.801	359.736	299.622	218.574	28.6215	718.001	734.21	682.52	589.428	788.913	604.764	657.092	544.098	563.452	620.293	576.109	646.033	427.484	438.413	507.477	356.536	514.229	427.046	148.498	88.7673	324.072	308.599	283.238
C01F6.6	tag-60	WBGene00006438	0	1.50734	1.80887	10.1846	0	0.702496	4.45284	0.974039	4.15933	2.80664	2.43488	1.16924	2.40444	6.68259	8.76364	6.24202	3.09816	1.82686	2.93743	6.85343	23.9168	7.76298	6.48337	0	1.51999	0.764779	6.49538	11.6258	7.37415	0.76722	3.02967	7.1201	2.67269	4.00986	2.81887	4.8316	10.6835	8.49129	30.2323	2.33317	14.0161	3.08054	2.79623	2.38797	20.1952	27.7083	19.1555
C01F6.8	icln-1	WBGene00002046	92.0176	69.2756	62.5429	82.0456	77.136	78.372	78.395	62.2576	60.1851	66.7283	64.0926	92.5899	83.2197	37.115	34.3618	30.6451	31.0757	40.1286	39.7051	44.0208	42.5581	50.2881	76.8442	91.9287	30.3369	45.1521	30.7117	27.5724	39.4798	25.2659	26.0302	24.903	37.458	33.8869	37.9694	31.7203	36.5433	40.9659	31.0688	49.4925	37.9075	52.2383	87.7482	81.6619	104.07	84.6153	45.4353
C01F6.9	C01F6.9	WBGene00007223	268.652	196.517	266.465	220.581	412.091	240.547	223.39	158.938	186.047	223.96	244.83	364.057	308.814	95.2152	79.9375	70.9009	72.6644	86.6816	63.4759	104.414	128.575	131.732	165.664	276.35	102.561	107.679	92.6836	91.7554	81.4015	94.9481	107.825	106.621	101.941	84.8179	98.1021	86.3037	109.245	109.543	105.653	92.6498	108.828	99.6389	226.217	286.516	139.847	130.928	123.46
C01G10.1	C01G10.1	WBGene00007230	0	0	0	0	0	0	0	0	0	0	0	0	0	0	0	0	0	0	0	0	0	0	0	0	0	0	0	0	0	0	0	0	0	0	0	0	0	0	0	0	0	0.319305	0	0	0	0	0
C01G10.10	C01G10.10	WBGene00007237	6.8685	3.66353	3.36307	1.31923	1.20939	1.17111	2.20756	14.8012	16.7893	20.0914	17.8511	13.1108	12.2169	10.6396	21.6274	21.0593	18.6073	15.3805	11.5575	13.4338	18.0857	23.3566	17.9872	11.9036	10.6477	15.6938	6.34007	3.85512	6.92162	19.0033	10.7289	9.95064	9.85491	10.7095	9.45499	9.6915	12.4445	5.52832	21.6183	15.4967	9.60125	8.44463	13.4498	7.29958	0	7.18983	5.95377
C01G10.11	unc-76	WBGene00006808	162.222	136.353	120.936	122.433	124.941	105.067	114.699	70.7314	67.5722	92.0307	75.5162	78.5124	104.821	31.4349	28.6591	38.6609	45.0042	52.4923	39.6772	40.8513	30.5867	22.8403	44.9159	134.761	10.9746	39.6986	25.6015	26.4738	32.5623	28.4221	23.2568	35.9154	34.1096	36.6816	14.8833	18.2362	33.8523	44	22.5053	42.1353	24.7606	32.8443	64.6708	148.011	81.8467	53.1499	15.3833
C01G10.12	dnj-3	WBGene00001021	3.99271	3.21375	1.68133	0.527499	1.20939	0.936776	0.315135	1.12745	2.57864	2.6018	2.84836	1.25799	3.33848	0	0.587355	0.841967	0	0.402108	0	0	0	0	0.28603	1.79621	0	1.80418	0	0.894763	3.13164	0.839022	0	1.12157	0	0	0.247903	0	0.604075	2.38752	0.568984	3.41457	0.986701	0.770776	1.87135	1.07069	0	3.03728	4.47999
C01G10.14	C01G10.14	WBGene00007239	0	0	0	0	0	0	0	0	0	0	0.289588	0	0	0	0	0	0	0	0.2565	0	0	1.01287	0	0	0	0	0	0	0	0	0	0	0	0	0	0	0	0	0	0	0	0	0	0	0	0	0
C01G10.15	C01G10.15	WBGene00007240	0	0	0	0	0	0	0	0	0	0	0	0	0	0	0	0	0	0	0	0	0	0	0	0	0	0	0	0	0	0	0	0	0	0	0	0	0	0	0	0	0	0.550948	0	0	0	0	0
C01G10.16	C01G10.16	WBGene00007241	0	0	0	0	0	0	0	0	0	0	0	0	0	0	0	0	0	0	0	0	0	0	0	0	0	0	0	0	0	0	0	0	0	0	0	0	0	0	0	0	0	0	0	0	0	0	0
C01G10.17	C01G10.17	WBGene00044658	0	0	0	0	0	0	0	0	0	0	0	0.39626	0	0	0	0	0	0	0	0	0.9172	0	0	0	0	0	0.639352	0	0	0	0	0	0	0	0	0	0	0	0	0	0	0	0	0	0	0	0
C01G10.18	C01G10.18	WBGene00077583	0	0	0	0	0	0	0	0	0	0	0	0	0	0	0	0	0	0	0	0	0	0	0	0	0	0	0	0	0	0	0	0	0	0	0	0	0	0	0	0	0	0	0	0	0	0	0
C01G10.2	srx-79	WBGene00005970	0	0	0	0	0	0	0	0.143794	0	0	0	0	0	0	0	0	0	0	0	0	0	0	0	0	0	0	0	0	0	0	0	0	0	0	0	0	0	0	0	0	0	0	0	0	0	0	0
C01G10.3	srx-78	WBGene00005969	0	0	0	0	0	0	0	0	0	0	0	0	0	0	0	0	0	0	0	0	0	0	0	0	0	0	0	0	0	0	0	0	0	0	0	0	0	0	0	0	0	0	0	0	0	0	0
C01G10.4	C01G10.4	WBGene00007231	0	0	0	0	0	0	0	0	0	0	0	0	0	0	0	0	0	0	0	0	0	1.62032	0	0	0	0	0	0	0	0	0	0	0	0	0	0	0	0	0.68814	0	0	0	0	0	0	0	0
C01G10.5	C01G10.5	WBGene00007232	0	0	0	0	0	0	0	0	0	0	0	0	0	0	0	0	0	0	0	0	0	0	0	0	0	0	0	0	0	0	0	0	0	0	0	0	0	0	0	0	0	0	0	0	0	0	0
C01G10.6	C01G10.6	WBGene00007233	0	0	0	0	0	0	0	0	0	0	0	0.376627	0	0.843547	0	0	0	0	0	0	0.9172	1.56792	0.980817	0	0	0	0	0	0	0	0	0	0	0	0	0	0	0	0	0	0	0	0	0	0	0	0
C01G10.7	C01G10.7	WBGene00007234	59.2917	52.4034	60.6571	27.2955	25.0411	53.657	78.157	8.37059	9.68403	10.0289	16.2433	26.5342	57.5389	1.63094	3.3035	0	0.515653	6.34796	3.47924	2.0038	6.95625	11.5339	5.36663	50.484	0	2.81942	3.96379	0	1.35263	0	4.74391	1.46256	0.981341	0.380654	3.07963	3.76715	1.97229	5.9284	9.35489	2.81985	10.2155	7.33606	17.976	24.2201	6.1901	0	5.94117
C01G10.8	C01G10.8	WBGene00007235	137.989	123.666	132.901	145.353	131.802	133.406	126.447	315.03	308.744	233.905	261.148	184.126	172.51	334.861	347.471	351.235	399.457	342.899	374.262	276.108	232.266	224.576	210.341	140.926	320.57	312.652	328.439	294.832	306.4	342.112	320.564	319.35	332.019	299.767	279.437	291.491	271.425	231.588	227.879	188.229	138.419	161.508	145.971	158.987	99.7928	126.866	109.003
C01G10.9	C01G10.9	WBGene00007236	0	0	0	0	0	0	0	1.60112	0.444551	0.311639	0.580615	2.03106	3.77089	2.47469	4.73695	2.53421	2.29756	2.28806	1.61671	2.18025	8.80264	8.86696	0.782856	0	1.51999	3.97359	8.81989	12.9582	6.83167	6.83752	12.0149	12.9585	4.78347	8.69604	4.8606	7.424	6.22418	9.48411	33.5315	42.4628	3.67953	7.96303	1.86007	4.19496	5.80703	15.8777	14.7778
C01G12.1	madf-5	WBGene00007242	18.3224	9.74727	8.9258	12.032	6.56878	2.57834	7.98011	3.40884	7.61269	1.49209	1.26829	7.06889	1.68072	4.41597	1.21477	1.34197	0.974551	1.52025	1.61782	1.17145	0	0	3.40947	9.46613	0	1.30829	0	0	0	0.76722	0	0	0.607604	0.448663	1.75429	0.378748	0.300071	0	0	0	0	0	1.86007	4.62207	0	0	0
C01G12.10	nspb-8	WBGene00007250	0	0	0	0	0	0	0	0.302638	0.373443	0	0.689038	0	0	1.57498	0	0	0.487201	0	1.24928	0	0	2.47568	0.941198	0	0	0.764779	0	0.894763	0	0	0	0	0.329675	0.942048	0	0	0	0.405571	0	1.32411	0.300779	0.472442	0.626765	0	0	0	0
C01G12.11	nspb-9	WBGene00007251	0	0	0	0	0	0	0	0.168193	0	0	0.667111	0	0	0	0.341031	0	1.00285	0	0	0.492291	0	0	0.858298	0	0	0	0	0	0	0	1.28505	0	0	0.746437	0	0	0.333352	0	0	0	0	0	0	0	0	0	0
C01G12.13	C01G12.13	WBGene00044333	0	0	0	0	0	0	0	0	0	0	0	0	0	0	0	0	0	0	0	0	0	0	0	0	0	0	0	0	0	0	0	0	0	0	0	0	0	0	0	0	0	0	0	0	0	0	0
C01G12.16	C01G12.16	WBGene00219299	0	0	0	0	0	0	0	0.12722	0	0.627422	0	0	0	0	0	0	0	0	0	0	0	0	0.470541	0	0	0	0	0	0	0	0.90129	0	0	0	0.247903	0	0	0.526187	0	0	0	0	0	0	0	0	0
C01G12.2	nspb-7	WBGene00007243	0	0	0	0	0	0	0	0	0	0	0.548451	0	0	2.36276	0	0	0	0	0	2.22615	0	0.783866	0.858298	0	0	0	0	0	0	0	0	0	0.329675	0.365783	0	0	0	0	0	0	0	0.472442	0	0	0	0	0
C01G12.3	C01G12.3	WBGene00007244	2.03383	1.26952	0	1.58327	2.41908	0.468274	0.315135	13.9588	13.0034	14.6561	14.7086	9.587	7.33416	18.447	20.5619	32.2022	27.7141	30.0984	23.2442	16.9949	5.63408	12.213	11.9177	2.44354	31.3145	35.3977	29.9178	49.1928	41.8326	34.4705	33.2901	32.6889	48.3664	53.2654	36.6003	45.7417	14.1838	23.0898	15.1823	12.3767	20.0059	19.6545	20.9496	8.06977	0	10.2851	8.73832
C01G12.5	C01G12.5	WBGene00007245	0	0	0	0	0	0	0	0	0	0	0	0	0	0	0	0	0	0	0	0	0	0.783866	0	0	0	0	0	0	0	0	0	0	0	0	0.568734	0	0	0	0	0	0	0	0	0	0	0	0
C01G12.6	nspb-10	WBGene00007246	0	0	0	0	0	0	0	0	0	0	0.621781	0	0	0	0	0	0	0	0	0	0	0	0.572129	0	0	0	0	0	0	0	0	0	0	0.365783	0	0	0	0	0	0	0.300779	0	0	0	0	0	0
C01G12.7	C01G12.7	WBGene00007247	0	0	0	0	0	0	0	0	0	0	0	0	0	0	0	0	0	0	0	0	0	0	0	0	0	0	0	0	0	0	0	0	0	0	0	0	0	0	0	0	0	0	0	0	0	0	0
C01G12.8	catp-4	WBGene00007248	0	0	0	0	0	0	0	0	0	0	0	0	0	0	0.404826	0	0	0.202301	0.626238	1.00531	1.18386	0.907762	0	0	0	3.46514	0	1.78974	0	1.34295	0	0	3.45406	0.365783	0.85362	1.9261	0	0	0.68814	0.504349	1.37201	0.475646	1.73685	0	0	0	0
C01G12.9	C01G12.9	WBGene00007249	0	0	0	0	0	0	0	0.0831624	0	0	0	0	0	0.787395	0.874624	0	1.89942	2.80132	0	1.17145	0	0.783866	1.9509	0	0	0	0	0	0	0	4.58935	0	0.327975	0.380654	0	0	0.874224	0	0	0	0	0	0	0	0	0	0
C01G5.2	prg-2	WBGene00004179	6.8685	6.2288	7.50429	10.7328	2.41908	4.22272	6.66148	6.38379	4.81614	6.32285	9.61317	5.10225	5.54503	3.38905	2.0894	1.43787	2.95285	1.07106	4.59965	3.00302	7.59973	8.78339	1.91008	6.21014	0	3.7849	3.29424	1.9326	2.06279	2.2817	3.11898	3.17632	6.27788	2.47364	5.3161	5.65265	7.75721	4.33389	5.14283	18.6535	7.74397	3.76205	9.60115	1.76496	8.19806	5.7518	2.79023
C01G5.3	C01G5.3	WBGene00015305	2.99416	3.75598	3.6254	0	2.0746	2.97645	5.14113	3.07265	4.50945	3.24302	1.97671	1.90777	0.984711	1.88486	1.34334	0.841967	1.46196	4.39013	0.445441	0.864842	0	3.24103	0	0	5.87029	1.0783	0.596023	0	0	0	0	3.30269	1.64036	2.5375	1.71842	3.2118	1.66758	0	1.13811	0	3.18913	0.948088	0.626765	2.38797	0	0	0
C01G5.4	C01G5.4	WBGene00015306	0	0	0	0	0	0	0	0	0	0	0	0	0	0	0	0.841967	0	0	0	0	0	0	0	0	0	0	0	1.11373	0	0	0	0	0	0	0	0	0	0	0.568984	0	0	0	0.626765	0	0	0	0
C01G5.5	C01G5.5	WBGene00015307	26.4786	48.4973	24.0743	57.9827	20.5188	30.8096	31.6326	44.9632	45.2875	28.1618	25.6179	22.951	22.7847	17.6587	23.7452	24.0864	21.7033	22.4304	11.314	10.0844	2.09192	3.54095	12.5535	19.7237	7.82572	4.52574	6.52655	2.06538	8.58456	7.25074	8.71983	3.45523	6.10778	2.91918	7.06295	2.81575	6.9981	2.26951	4.11811	4.56785	7.11944	3.30929	20.6235	19.2904	5.80703	2.07602	6.81767
C01G5.6	C01G5.6	WBGene00015308	69.4303	57.3694	68.9703	49.597	46.1604	65.918	74.5687	52.2308	47.9861	59.0239	70.9775	81.5605	163.247	104.486	70.3841	72.5267	64.1478	53.6852	60.8959	90.7758	119.953	104.763	66.3185	131.71	168.898	172.362	158.57	198.529	186.654	154.979	130.135	126.114	178.595	162.032	139.212	129.312	182.392	223.598	147.251	126.446	200.59	206.736	157.93	169.261	110.647	141.244	128.522
C01G5.7	C01G5.7	WBGene00015309	0	0	0	0	0	0	0	0	0	0	0	0	0	0	0	0	0	0	0	0	0	0	0	0	0	0	0	0	0	0	0	0	0	0	0	0	0	0	0	0	0	0	0	0	0	0	0
C01G5.8	fan-1	WBGene00015310	20.3607	28.2628	16.5362	40.6084	17.7896	15.0441	37.6514	25.6257	28.2491	14.7114	21.5835	19.6025	31.2631	8.38574	10.0007	13.851	7.02675	13.0263	9.14066	10.5329	3.27578	3.84174	14.0703	26.0847	2.93478	16.9108	9.41479	4.15289	6.92162	2.51768	7.26408	6.29751	12.0839	4.46115	5.67628	7.49273	5.77138	9.55812	12.5269	6.47043	7.03815	2.42229	32.1716	31.8113	0	9.75107	17.2034
C01G5.9	C01G5.9	WBGene00015311	0	0	0	0	0	0	0	0	0	0	0	0.485098	0	0	0.404826	0	0.515653	0	0	0	0	0	0	0	0	0	0.643177	0	0	0	0	0.511496	0	0	0	0	0	0	0	0	0	0	0	0	0	0	0
C01G6.1	aqp-2	WBGene00000170	0.997811	1.26952	0	0	0	0	0	8.87742	7.78989	1.54537	6.76651	8.70117	1.18287	28.0797	28.4523	34.5331	24.3367	24.9433	18.7462	33.8393	11.8235	12.4943	37.941	0.942699	87.4405	51.7256	56.8039	50.8727	39.1981	43.9841	70.8713	55.9554	136.479	95.9248	73.0498	41.078	11.3459	28.5001	9.46797	23.0483	123.048	142.25	107.441	8.69285	32.1953	70.0642	29.9933
C01G6.2	C01G6.2	WBGene00007224	0	0	0	0	0	0	0	0.393789	0	0.542784	0.804498	0	0	0	0	0	1.12019	0.620995	1.18708	0	1.04583	0	2.05291	0	6.7427	1.60392	2.98571	3.85512	6.63784	0.839022	3.3621	2.34216	7.73366	4.96179	4.28666	2.39425	3.68472	1.39643	1.25048	3.31585	2.13541	7.03929	1.09862	0	0	10.2279	1.68977
C01G6.3	C01G6.3	WBGene00007225	417.72	550.114	519.242	449.774	333.658	524.398	311.658	491.176	493.337	469.37	549.808	377.962	268.427	827.894	785.679	715.856	793.801	746.426	844.953	904.37	1036.57	1153.36	703.83	241.528	1478.65	1495.19	1570.7	1628.26	1607.09	1270.48	1470.27	1562.85	1411.42	1510.86	1635.06	1721.51	1232.25	1473.04	1134.98	1565.34	1474.53	1542.92	986.609	543.216	1095.38	1130.06	1111.75
C01G6.4	C01G6.4	WBGene00007226	135.309	178.354	163.079	66.0339	73.7637	83.5574	108.737	26.2564	21.6776	31.767	25.5403	55.6326	37.4132	20.4191	27.4102	18.3635	32.6596	17.3896	17.7296	11.4733	14.4286	19.0809	31.1602	81.3273	13.5825	25.1916	24.5799	36.7566	49.7119	23.6792	27.751	28.9136	33.3693	29.4736	31.3371	48.5929	23.7102	44.8642	40.0048	35.6949	22.1881	23.5039	51.3059	61.7948	36.385	34.9592	70.6927
C01G6.5	C01G6.5	WBGene00007227	157.644	231.98	173.587	179.167	179.541	178.548	139.757	278.222	304.604	264.345	244.221	126.592	205.381	279.925	247.833	246.279	303.559	295.595	251.726	185.531	80.8619	121.931	253.651	186.999	91.57	95.2097	49.0525	94.7591	49.7737	84.024	61.9104	91.9174	100.813	104.357	89.0547	86.8507	84.1002	64.4798	68.0983	62.5166	92.2613	103.941	176.361	116.206	107.609	37.6222	76.7588
C01G6.6	mtrr-1	WBGene00006510	37.8183	29.9078	54.0102	41.6075	58.9459	56.2238	54.5411	27.1653	27.5913	28.0479	23.1888	55.6679	37.6941	10.5504	7.01748	9.39063	9.17915	4.88809	11.795	8.19953	6.29455	8.29828	11.3594	25.15	26.3164	20.7585	8.7673	13.483	8.32684	14.5869	18.4281	21.6619	13.9041	14.7585	15.7258	16.7247	14.6519	12.5128	12.1694	12.5486	14.9993	17.1481	18.8668	7.74699	0	22.4902	19.2385
C01G6.7	acs-7	WBGene00007228	0	0	0	0	1.20939	0	0	0	0.171365	0	0	0	0	0	0	0	0	0	0	0	0	0	0	0	0	0	0	0	0	0	0	0	0	0.365783	0	0	0	0	0	0	0	0	0	0	0	0	0
C01G6.8	cam-1	WBGene00000289	170.106	175.715	129.621	173.061	142.812	150.683	125.405	141.218	141.123	133.335	102.845	90.2866	92.4433	71.016	66.5799	97.8052	71.8619	65.3415	67.5078	50.2368	34.6337	36.7116	152.281	88.6833	211.672	127.508	218.607	83.7582	266.743	148.332	205.744	55.3582	91.0402	72.1781	72.9241	52.9674	49.9188	46.3686	40.3164	52.9379	52.8969	59.9009	113.231	98.0186	550.855	71.5498	151.552
C01G6.9	C01G6.9	WBGene00007229	0	0	0	0	0	0	0	0.428985	0	0	0	0	0	0.843547	0	2.38449	0	0.202301	0.33084	1.17145	0	1.56792	0.622063	0	1.51999	1.52975	9.14388	1.02754	9.38604	4.19019	3.11898	0.733	3.30684	0	2.63091	0.954075	0	0	0	0	0	0	0	0	0	3.03728	0
C01G8.1	C01G8.1	WBGene00015312	270.389	299.499	325.243	351.635	406.951	382.202	543.223	127.9	135.393	149.419	146.563	252.685	606.672	16.8442	4.2472	7.64247	5.05476	5.91662	8.19714	9.25978	9.83128	9.58977	42.4865	698.051	25.3356	9.20542	12.8	11.8281	22.5045	7.97417	13.6439	13.4872	14.5359	12.6963	8.00371	8.81518	17.0411	13.9669	8.0162	23.4023	10.2142	23.5131	155.39	609.257	0	4.53332	8.80883
C01G8.2	cln-3.2	WBGene00000540	4.06816	9.5097	15.0203	14.3749	2.41908	12.8463	11.1419	19.2673	18.026	11.9516	14.0279	15.8987	15.7369	21.5873	10.9447	14.9905	13.056	11.9444	14.6059	5.02793	10.8753	5.94724	16.0813	6.94233	1.51999	8.04277	2.70769	0.894763	3.10551	4.1241	7.86288	3.69108	3.09357	5.25308	3.32022	3.44966	2.97558	5.30669	1.37645	0.504349	4.13694	2.71787	8.16921	11.8545	28.3953	12.3617	9.0905
C01G8.3	dhs-1	WBGene00000965	65.3301	43.9806	60.2966	107.178	93.8533	89.1231	106.949	62.1059	69.5212	62.1462	56.9911	90.0602	154.944	21.3987	19.023	20.2555	32.0074	23.9929	25.1691	13.6412	10.6277	10.2735	39.3377	163.629	11.3038	12.8406	19.1119	7.06478	13.8963	18.4715	31.4914	18.3487	13.4312	13.5058	17.1064	20.0254	17.5119	12.9927	8.48275	22.1551	16.552	18.2628	43.9308	111.511	11.6155	17.7999	23.7858
C01G8.4	dnj-4	WBGene00001022	20.6156	8.09447	9.43916	14.676	21.5741	13.4733	15.8991	9.78394	12.4411	12.0787	4.41481	23.027	24.6287	0.843547	2.85923	4.56436	2.72788	2.83825	5.25039	4.33692	1.04583	3.43606	2.02377	33.6654	4.45478	1.67869	1.05571	6.30214	2.70558	3.62465	2.46059	3.17958	5.42996	5.15042	0.743891	3.52911	7.31729	3.52245	7.11947	3.45025	2.48597	1.186	11.8006	19.2279	6.1901	10.2279	4.47999
C01G8.5	erm-1	WBGene00001333	151.887	198.334	70.6615	176.65	233.844	95.0571	36.0394	159.731	161.485	77.3656	51.6828	30.4105	25.7221	182.819	125.496	174.441	131.583	147.443	141.436	91.5039	19.0423	32.584	39.5921	29.8945	30.5493	35.6491	32.7582	42.8086	27.6837	64.9916	26.6327	37.113	38.7593	37.2813	31.2943	45.0702	54.3566	51.0798	30.5032	54.7127	31.0102	40.9852	33.6933	28.883	132.298	100.267	89.7206
C01G8.6	hpo-32	WBGene00015313	34.6428	32.9774	38.4352	5.93268	6.72346	24.3088	2.20756	3.80011	3.93546	6.5386	5.16416	16.6797	18.2404	3.37542	3.11299	2.92617	1.26613	2.38444	3.09183	3.04509	3.67015	1.81574	4.67026	16.3666	5.97514	5.37517	4.6649	4.83651	5.16831	2.37365	8.17177	4.05067	8.42572	7.82429	2.8129	5.12849	5.99908	2.80608	1.6938	0	5.88951	4.38329	11.5122	26.4097	0	0	5.07054
C01G8.9	let-526	WBGene00002717	1.99586	2.24864	0	0	2.41908	12.2337	0	3.31337	7.16229	2.0326	3.05904	3.46965	3.51364	9.70622	5.02761	10.7658	10.3076	3.70045	7.29244	8.73982	1.18386	4.52069	7.32904	17.8344	3.37094	13.8272	4.04933	14.6955	3.5319	4.85731	5.49064	3.83273	9.35658	7.97434	6.68276	9.18841	2.08218	8.93769	7.99772	5.03663	3.25142	7.46213	3.49413	3.60968	25.6234	5.7518	9.03882
C01H6.1	col-61	WBGene00000637	0	0	0	0	0	0	0	0	0	0	0	0	0	0	0	0	0	0	0	0	0	0	0	0	0	0	0	0	0	0	0	0	0	0	0	0	0	0	0	0	0	0	0	0.34911	0	0	0
C01H6.2	C01H6.2	WBGene00007252	0	0	0	0	0	0	0	0.589594	0	0	0.592341	0	0	0	0.587355	3.3691	0.515653	0.687186	0.890991	1.03314	2.09192	3.82323	0	0	0	1.52975	0	0	0	1.60624	0	1.10695	0	0	0	0	0	0	7.70561	5.2984	0.300779	1.57573	0.772733	1.04759	0	0	0
C01H6.3	C01H6.3	WBGene00007253	0	0	0	0	0	3.05731	0	0	0.456837	0	0	0	0	0	0	0	0	0.334459	0	0	0	0	0	0	0	0	0	0	0	0	0	0.733	0	0	0.357944	0	0	0	0.68814	0	0	0	0	0	0	0	0
C01H6.4	C01H6.4	WBGene00007254	0	0	0	0	0	0	0	0	0	0	0	0	0	0	0	0	0.487201	0	0	2.22615	0	0	0	0	0	0	0	0	0	0	0	0	0	0	0	0	0	0	1.16704	1.30607	0	0	0	0	0	0	0
C01H6.5	nhr-23	WBGene00003622	4.06816	6.00572	5.68731	4.7568	6.91393	5.55605	6.97731	3.9965	4.61718	3.13535	4.85246	4.58218	4.8354	2.48932	1.17485	0.792007	0	1.19503	1.61102	4.89521	1.04583	2.02599	2.43582	17.7668	1.51999	0	1.23537	2.05532	1.75289	0.839022	0	0.733	1.8935	0	0.291736	0	0.904147	0.81124	1.16704	3.66797	0.300779	0.683035	5.75824	14.0641	0	0	0
C01H6.6	C01H6.6	WBGene00007255	0	0	0	0	0	0	0	0	0	0	0	0.359305	0	0	0	0	0	0	0	0	0	0.783866	0	0	0	0	0	0	0	0	0	0	0	0	0.495675	0	0	0	0	0	0	0	0	0	0	0	0
C01H6.7	tag-298	WBGene00007256	115.349	101.95	108.749	156.127	157.215	129.5	87.2844	216.813	244.617	170.838	174.592	130.305	150.519	334.465	274.248	326.538	328.13	323.365	303.98	296.532	278.033	242.766	236.784	182.926	286.817	466.966	397.91	461.706	412.177	398.962	394.398	403.121	418.094	438.295	407.736	411.004	365.334	361.273	262.828	271.927	281.009	301.357	205.38	164.831	446.658	345.248	281.629
C01H6.8	C01H6.8	WBGene00007257	0	0	3.87078	0	0	0	0	0.280087	1.01142	0	0	0.376627	0.460292	0	0.341031	0	0	0.202301	0.708562	0	0	0	0	0	0	0.419519	0.639352	0	0	0	0	0	0	0.280663	0	0	0	0	0	0	0	0.944443	0.936157	1.1877	0	0	0
C01H6.9	C01H6.9	WBGene00007258	18.3224	27.6542	21.2985	40.4082	42.323	17.2378	31.6129	40.7172	49.8423	34.7342	42.064	26.3968	21.7502	53.9892	60.3695	64.6397	54.3237	66.7652	57.6907	67.4278	48.0523	49.0157	44.8134	28.5037	62.1204	75.4494	64.5217	68.7711	66.1195	72.3103	75.7721	77.0972	77.013	77.9449	62.4032	73.9424	59.5326	94.5828	56.6568	53.5418	49.7367	62.8788	55.2979	25.5574	134.123	159.86	129.926
C02A12.1	gst-33	WBGene00001781	0	0	0	0	0	0	0	0	0	0	0	0	0	0	0	0	0	0	0	0	0	0	0	0	0	0	0	0	0	0	0	0	0	0	0	0	0	0	0	0	0	0	0	0	0	0	0
C02A12.10	srbc-33	WBGene00044090	0	0	0	0	0	0	0	0	0	0	0	0	0	0	0	0	0	0	0	0	0	0	0	0	0	0	0	0	0	0	0	0	0	0	0	0	0	0	0	0	0	0	0	0	0	6.22959	0
C02A12.2	srbc-29	WBGene00015315	0	0	0	0	0	0	0	0	0	0	0	0	0	0	0	0	0	0	0	0	0	0	0	0	0	0	0	0	0	0	0	0	0	0	0	0	0	0	0	0	0	0	0	0	0	0	0
C02A12.3	srbc-30	WBGene00015316	0	0	0	0	0	0	0	0	0	0	0	0	0	0	0	0	0	0	0	0	0	0	0	0	0	0	0	0	0	0	0	0	0	0	0	0	0	0	0	0	0	0	0	0	0	0	0
C02A12.4	lys-7	WBGene00003096	0	0	0	0	0	0	0	0	0	0	0	0	0	0	0	1.4923	0	0	0	0	0	0	0	0	0	0	0	0	0	0	0	0.733	0	0	0	0	0	0	0	0	0	0	0	0	0	0	0
C02A12.5	srbc-32	WBGene00015317	0	0	0	0	0	0	0	0	0	0	0	0	0	0	0	0	0.487201	0.418694	0	0	0	0	0	0	0	0.888768	0	0	0	0	0	0	0	0.356548	0	0	0	0	0	0	0	0	0	0	0	0	0
C02A12.6	srbc-36	WBGene00015318	0	0	0	0	0	0	0	0	0	0	0	0	0	0	0	0	0	0	0	0	0	0	0	0	0	0	0	0	0	0	0	0	0	2.5375	0	0	0	0	0	0	1.62386	0	0	0	0	0	0
C02A12.8	oac-2	WBGene00044088	0	0	0	0	0	0	0	0	0	0	0	0	0	0	0	0	0	0	0	0	0	0	0	0	0	0	0	0	0	0	0	0	0	0	0	0	0	0	0	0	0	0	0	0	0	0	0
C02A12.9	srbc-31	WBGene00044089	0	0	0	0	0	0	0	0	0	0	0	0	0	0	0	0	0	0	0	1.17145	0	0	0	0	0	0	0	0	0	0	0	0	0	0	0	0	0	0	0	0	0	0	0	0	0	0	0
C02B10.1	ivd-1	WBGene00015326	61.9376	55.8084	42.4201	94.0803	84.1575	59.8266	100.157	56.6184	56.0887	41.0885	38.3204	62.6599	95.4149	43.4459	32.806	30.7882	27.4346	26.697	27.7436	16.7967	30.1793	25.9648	27.6569	77.708	18.9218	9.19033	13.3572	10.3675	7.03896	9.67152	18.6091	17.4699	11.1983	8.7099	9.91921	11.1943	20.2886	14.5452	14.1413	8.12843	8.21109	14.2506	34.5774	68.554	6.1901	25.7356	22.6071
C02B10.2	C02B10.2	WBGene00015327	138.011	88.6808	120.295	112.469	123.469	117.645	106.874	125.991	129.606	137.17	121.901	140.811	141.925	126.981	108.854	121.628	107.55	127.203	92.5911	81.0567	57.7887	86.7131	86.0768	157.205	35.552	47.9964	33.1591	43.0672	28.1752	36.4154	29.0304	37.8455	38.8833	38.639	43.2848	36.2798	51.7227	38.0738	28.2259	59.154	43.2993	45.0177	93.9694	123.46	32.5799	39.2369	31.3986
C02B10.3	C02B10.3	WBGene00015328	0	0	0	0	1.20939	0	0	1.02534	1.23048	0.338864	0	0	0.460292	1.81406	2.79252	0	0	0.602465	0.383242	2.35214	0.9172	0.783866	0	0	2.93478	0	2.46909	0	0	2.18197	0	0	0.924922	0	1.46067	0	0	1.87412	0	0.504349	1.43941	0	0	1.1877	0	0	0
C02B10.4	C02B10.4	WBGene00015329	549.648	451.204	430.787	467.908	511.264	387.563	469.998	342.178	324.388	294.437	345.219	310.756	197.925	437.549	389.385	404.338	475.68	446.171	433.941	519.127	597.015	488.169	408.803	229.066	447.593	595.529	574.446	549.995	579.917	524.309	578.093	556.78	534.972	513.692	533.017	542.309	511.459	526.238	421.744	368.62	577.882	537.05	396.979	328.61	287.197	260.376	212.517
C02B10.5	C02B10.5	WBGene00015330	16.2846	26.9904	29.4935	15.3367	9.33538	28.2194	24.8802	28.631	27.1691	19.7862	26.2329	31.9033	25.954	56.7101	36.8669	56.4945	41.7574	41.4297	43.4757	39.726	21.2475	30.0564	18.4445	26.0986	33.2687	63.4186	35.9679	45.2349	62.7104	47.0865	56.9182	33.736	67.03	43.6832	53.8946	53.9755	55.3691	68.1015	24.6451	23.2247	30.6617	36.8549	19.6802	36.5866	96.2171	44.186	87.5035
C02B10.6	C02B10.6	WBGene00015331	0	0	0	0	0	0	0	0	0	0	0	0	0	0	0	0	0	0	0	0	0	0	0	0	0	0	0	0	0	0	0	0	0	0	0	0	0	0	0	0	0	0	0	0	0	0	0
C02B4.1	adt-1	WBGene00000082	0	0	0	0	0	0	0	0	0	0	0	0	0	0	0	0	0	0	0	0	1.18386	0.783866	0	0	0	0	0	0	0	0	0	0	0	0	0	0	0	0	1.70737	0	0	0	0	0	0	0	0
C02B4.2	nhr-17	WBGene00003616	6.8685	8.09447	9.18562	17.5931	10.8952	15.2003	12.0648	12.8011	12.4035	10.9785	10.1617	18.0526	13.1675	5.09117	4.9371	5.45269	6.71235	3.46982	4.57519	7.39198	42.6761	44.0227	10.4459	28.8626	3.37094	6.67399	6.60146	25.7602	7.1915	8.92638	5.82351	10.9449	4.02376	2.52805	4.8621	5.29167	7.9206	10.8031	107.838	119.844	4.69942	9.56589	9.84403	31.8103	14.3882	17.9611	18.8809
C02B4.3	C02B4.3	WBGene00007259	0	0	0	0	0	0	0	0	0	0	0	0	0	0	0	0	0	0	0	0	0	0	0	0	0	0	0	0	0	0	0	0	0	0	0	0	0	0	0	0	0	0	0	0	0	0	0
C02B4.4	C02B4.4	WBGene00045386	0	0	0	0	0	0	0	0.337634	0.829219	6.01939	4.97984	0	0.504344	3.45984	6.0567	5.90683	5.44622	11.5673	8.00988	10.7298	8.80264	8.56593	0	0	0	1.80418	6.57338	11.3626	5.569	8.60179	7.29388	5.3223	3.06097	2.35876	3.51119	5.15124	5.23834	4.44878	20.4892	8.66889	0.300779	6.61168	0.626765	0.34911	0	9.06775	0
C02B8.1	C02B8.1	WBGene00015320	0	0	0	0	0	0	0	0	0	0	0	0	0	0	0	0	0	0	0.445441	0	0	0	0	0	0	0	0	0	0	0	0	0	0	0	0	0	0	0	0	0	0	0	0	0	0	0	0
C02B8.2	fbxc-38	WBGene00015321	0	0	0	0	0	0	0	0.638194	0.182698	3.74886	0.548451	0	0	0.91434	1.61767	2.42618	0.632987	1.91981	0.235491	2.39027	0.9172	0.783866	1.37863	0	0	0.764779	0.798415	0	0	0	0	1.34307	0.223847	0	1.58057	0.85173	4.80534	2.43491	2.29186	0	6.8199	4.51401	0	0	0	0	0
C02B8.3	C02B8.3	WBGene00015322	0	0	0	0	0	0	0	0.230124	0.285472	0.311639	0	0	0	0	1.70845	2.97594	1.46196	1.14125	0.801879	0.984703	0.9172	0	0	0	3.37094	3.27557	5.16728	0	3.10551	9.02392	7.95221	1.24106	3.6951	1.6754	1.61034	0	0	0.526187	1.13811	0	0.300779	0.502	0	0.34911	0	7.18983	5.07621
C02B8.4	hlh-8	WBGene00001953	0	0	0	0	0	0	0	0.16076	0.332	0	0	0	0	0	0	0	0	0	0	0	0	0	0	0	0	0	0	0	0	0	0	0	0	0	0	0	0	0	0	0	0	0	0	0	0	0	0
C02B8.5	frpr-1	WBGene00015323	0	0	0	0	0	0	0	0	0	0	0	0	0	0	0	0	0	0	0.383242	0	0	0	0	0	0	0	0	0	0	0	0	0	0	0	0	0	0	0	0	0	0	0	0	0	0	0	0
C02B8.6	C02B8.6	WBGene00015324	0	0	0	0	0	0.234108	0.630346	0.346675	0.123597	0.271359	0.257424	0	0.460292	2.72841	0.404826	0	0	0.209321	0	0	1.18386	0	0	1.88563	3.37094	2.60804	0	1.11373	0	0	0	0.910325	0.22485	0.356548	0	0.765302	2.25303	0	0	0	0.685921	0	0.337356	0.593779	5.80703	0	0
C02B8.7	C02B8.7	WBGene00015325	0	0	0	0	0	0	0	0	0	0	0	0	0	0	0	0	0	0	0	0	0	0	0	0	0	0	0	0	0	0	0	0	0	0	0	0	0	0	0	0	0	0	0	0	0	0	0
C02C2.1	tyr-1	WBGene00015332	0	0	0	0	0	0	0	0.291859	0.332	0	0	1.23844	0.379964	0	0	0	0	0	0	1.17145	0	0	0	0	0	0	0	0	0	0	0	0	0	0.365783	0	0	0	0	0	0	0.749543	2.197	0	0	0	0	0
C02C2.3	cup-4	WBGene00000845	0	0	0	0	0	0	0	0	0	0	0	0	0	0	0	0	0	0	0.2565	0	0	0	0	0	0	0	0.643177	3.25526	0	0	2.57042	0	1.23275	1.6775	0	0.460697	0	1.0525	0	0	0	0.472442	0	0	0	0	0
C02C2.4	C02C2.4	WBGene00015333	0	0	0	0	0	0	0	0	0	0	0	0	0	0	0	0	0	0.317388	0	0.864842	0	0	0	0	0	0	0	0	0	0	0	0	0.327975	0	0	0	0	0.405571	0	0	0.766797	0	0	0	0	0	0
C02C2.5	C02C2.5	WBGene00015334	0	0	0	0.791346	1.20939	0	0	0	0.369073	0	0.912808	0	0	0	0	0	0	0	0	0	1.18386	0	0.28603	0	0	0	0.596023	1.11373	0	0	0	0	0	0	0.495867	0	0	0	0	0	0	1.14927	0	0	0	0	0
C02C6.1	dyn-1	WBGene00001130	59.1836	36.8496	76.269	22.9186	28.3013	40.0749	56.5194	3.28149	4.95668	7.97323	4.6378	23.5037	50.5423	4.41597	3.61337	0.595905	6.88686	2.38402	7.60237	0	2.09192	1.69163	4.76933	55.2747	5.97514	10.7899	12.3215	25.2844	14.2338	9.13959	8.9715	12.5325	7.6798	14.2126	10.7261	13.25	7.9868	12.8237	4.46094	15.1924	7.47347	16.9523	29.8542	35.5029	14.0051	7.82833	45.1912
C02C6.2	olrn-1	WBGene00007260	0	0	0	0	0	0	0	0.16076	0.247386	0	0	0	0	0	0	0	0	0.402108	0.295398	0	0.9172	1.01287	0	0	0	0	0	0.894763	0	0	0	0	0	0.942048	1.21791	0.378748	0	0	1.13811	0.819757	0	0	0	0.34911	0	0	2.79023
C02C6.3	lron-3	WBGene00007261	6.10298	1.94423	9.3136	3.67588	0	0.702496	4.13763	1.3618	1.85198	1.56664	2.73147	4.78169	6.64919	3.38905	3.44687	2.18011	2.18032	3.09156	4.05782	0.492291	8.52533	11.8692	0.408688	2.26513	1.51999	5.50775	1.65173	2.15157	1.35263	5.8991	4.1749	3.82893	3.46517	3.63773	4.89855	4.16189	1.0146	9.4893	14.0147	24.6585	4.11188	9.88066	6.7784	3.51179	0	0	5.94117
C02D4.1	jud-4	WBGene00007262	0	0	0	0	0	0	0	0	0	0	0	0	0	0	0	1.4923	0	0	0	0	0	1.62032	0	0	0	0	0	0	0	0	0	0	0	0	0	0	0	0	0	0	0	0	0	0	0	0	0
C02D4.2	ser-2	WBGene00004777	0	0	0	0	0	0	0	0.349843	0	0.271359	0	0	0	0	0	0	0	0	0.2565	0	0	0	0.28603	0	0	0	0	0	0	0	0	0	0	0	0	0	0	0	0	0	0	0.472442	0	0	0	0	0
C02D5.1	acdh-6	WBGene00015335	0	0	0	0	0	0	0	0	0	0.311639	0	0	0	0	0	0	0	0	0	0	0	0	0	0	0	0	0	0	0	0	0	0	0.327975	0.356548	0	0	0	0	0	0	0	0	0	0	0	0	0
C02D5.2	C02D5.2	WBGene00015336	0.997811	0	0	0	0	0	0	0.705222	0.80204	0	0	0	0	0.970518	0	0	0	0	0.33084	0	0	0	0	0	0	0.419519	1.92586	0	1.77902	0	0	0	6.98415	3.21207	2.13225	1.31042	0.881329	0.81124	0.568984	0	0	0	0	0	0	0	0
C02D5.3	gsto-2	WBGene00015337	0	0	0	0	0	0	0	0.10173	0	0.311639	0.580615	0	0	0	0	0	1.94934	0	0	0	1.04583	1.62032	0.408688	0	0	0	0	0	0	0	0	0	0	0	0	0	0	0	0	0	0	0	0	0	0	0	0
C02D5.4	C02D5.4	WBGene00043097	53.2226	42.7988	39.357	82.8667	32.8	45.7399	39.4591	84.5175	78.7877	74.2665	73.3355	43.5624	46.9938	69.1474	73.4753	72.8758	68.8706	66.8345	59.5005	46.3887	22.8348	29.6619	34.2764	51.216	26.5255	24.6529	24.0785	21.592	32.8996	32.2646	35.829	41.2594	39.6701	39.3309	33.0553	31.9912	39.148	20.8708	25.5566	8.30987	17.8675	15.7778	18.5054	21.1401	8.19806	2.07602	0
C02E11.1	nra-4	WBGene00015344	106.123	108.3	113.469	132.385	111.309	113.963	113.839	93.9694	103.623	101.735	103.471	82.5538	63.4465	105.169	110.721	118.758	128.68	132.897	111.056	152.823	166.531	157.557	126.796	56.7654	121.096	129.731	134.408	115.466	116.092	109.301	123.816	132.809	111.41	123.799	129.832	120.275	126.318	149.491	136.926	91.8218	145.576	159.932	104.603	79.9872	104.831	84.2463	128.259
C02E7.1	catp-2	WBGene00015338	0	0	0	0	0	0	0	0	0	0	0	0	0	0	0	0	0	0	0	0	0	0	0	0	0	0	0	0	0	0	0	0	0	0	0	0	0	0	0	0	0	0	0	0	0	0	0
C02E7.10	C02E7.10	WBGene00015342	0	0	0	0	0	0	0	0	0	0	0	0	0	0	0	0	0	0	0	0	0	0	0	0	0	0	0	0	0	0	0	0	0	0	0	0	0	0	0	0	0	0	0	0	0	0	0
C02E7.13	str-211	WBGene00006244	0	0	0	0	0	0	0	0	0	0	0	0	0	0	0	0	0	0	0	0	0	0	0	0	0	0	0	0	0	0	0	0	0	0	0	0	0	0.526187	0	0	0	0	0	0	0	0	0
C02E7.2	srh-21	WBGene00005246	0	0	0	0	0	0	0	0	0	0	0	0	0	0	0	0	0	0	0	0	0	0	0	0	0	0	0	0	0	0	0	0	0	0	0	0	0	0	0	0	0	0	0	0	0	0	0
C02E7.3	srh-20	WBGene00005245	0	0	0	0	0	0	0	0	0	0	0	0	0	0	0	0	0	0	0	0	0	0	0	0	0	0	0	0	0	0	0	0	0	0	0	0	0	0	0	0	0	0	0	0	0	0	0
C02E7.4	srh-22	WBGene00005247	0	0	0	0	0	0	0	0	0	0	0	0	0	0	0	0	0	0	0	0	0	0	0	0	0	0	0	0	0	0	0	0	0	0	0	0	0	0	0	0	0	0	0	0	0	0	0
C02E7.5	srh-23	WBGene00005248	0	0	0	0	0	0	0	0.143794	0	0	0	0	0	0	0	0	0	0	0	0	0	0	0	0	0	0	0	0	0	0	0	0	0	0	0	0	0	0	0	0	0	0	0	0	0	0	0
C02E7.6	C02E7.6	WBGene00015339	0	0	0	0	0	0	0	0	0	0	0	0	0	0	0.587355	0	0	0	0	0	0	0	0	0	0	0	0	2.22773	0	0	0	0	0	0	0	0	0.604075	0.990855	0.568984	0	0	0	0	0	0	0	0
C02E7.7	C02E7.7	WBGene00015340	0	0	0	0	0	0	0	0	0	0	0	0	0	0	0	0	0	0	0	0	0	0	0	0	0	0	0	0	0	0	0	0	0	0	0	0	0	0	0	0	0	0	0	0	0	0	1.39494
C02E7.8	C02E7.8	WBGene00015341	0	0	0	0	0	0	0	0	0	0	0	0	0	0	0	0	0	0	0	0	0	0	0	0	0	0	0	0	0	0	0	0	0	0	0	0	0	0	0	0	0	0	0	0	0	0	0
C02E7.9	str-205	WBGene00006238	0	0	0	0	0	0	0	0	0	0	0	0	0	0	0	0	0	0	0	0	0	0	0	0	0	0	0	0	0	0	0	0	0	0	0	0	0	0	0	0	0	0	0	0	0	0	0
C02F12.1	tsp-17	WBGene00006643	0	0	0	0	0	0	0.315135	0.203486	0	0	1.97671	0	0	5.88017	4.74852	4.16111	3.43972	0.887612	2.45447	1.50815	1.04583	0.783866	0.622063	0	0	1.3215	0.596023	0	0	1.39041	0.90129	1.10695	0	0.365783	0.247903	1.33206	0.937428	1.0525	0.568984	0	0	1.59882	0	0	0	0	0
C02F12.10	C02F12.10	WBGene00045215	0	0	0	0	0	0	0	0.0831624	0	0.677812	0.291027	0.376627	0	0.843547	1.17485	1.4923	1.60754	2.63673	0.445441	1.00531	2.09192	0.783866	0.905515	0	2.93478	0.764779	0	0.894763	0	1.14071	3.65672	0	1.80288	2.80576	1.33928	1.34791	0.581258	2.5316	0	0	0	0.862175	0.936157	0	0	7.5706	8.50785
C02F12.3	snet-1	WBGene00015354	0	0	0	0	0	0	0	0	0	0	0	0	0	0	1.21284	0	0	0	0	0	0	0	0.470541	0	0	0	0.639352	0	0	0	0	0	0	0	0.357944	0.476979	0	0	0	0	0	2.29717	0	0	0	0	0
C02F12.4	tag-52	WBGene00006431	94.074	67.8284	83.8262	80.0092	60.9829	56.1033	63.3016	59.1269	61.9694	50.3781	50.4288	56.2091	58.9891	40.1935	65.6521	46.5249	50.225	48.8398	51.721	28.8653	28.1976	25.9673	66.8065	61.5231	20.9904	33.697	28.2399	37.5328	30.576	26.1735	23.682	30.0965	37.0808	34.1612	32.8269	37.742	31.9901	46.5675	23.1851	8.76833	48.5241	45.0481	41.9237	51.7044	92.4372	87.0184	62.0407
C02F12.5	C02F12.5	WBGene00015355	0	0	0	0	0	0	0	0	0.182698	0	0	0	0	0	0	0	0	0.202301	0	0	0	0	0.470541	0	0	0	0	0	0	0	0	0	0	0	0.413695	0.476979	0	0	0	0	0	0	0	0	0	0	0
C02F12.7	tag-278	WBGene00015356	0	0	0	3.04821	4.64887	0	0	1.60441	3.05439	3.57905	3.09455	1.6347	1.38121	4.05006	3.22229	4.77132	1.94952	2.69191	0.828683	9.41345	6.41558	9.92566	0.941198	0.557906	2.93478	0.888768	3.37207	1.11373	0	3.44293	3.85611	2.34216	0.615065	0	2.05652	1.99171	0.714531	2.10552	4.22276	0.504349	5.52717	1.64757	0.772733	1.39695	0	0	1.39494
C02F12.8	C02F12.8	WBGene00015357	48.1501	17.2258	36.4734	26.027	15.1954	19.6743	19.1044	44.4954	47.0422	27.5125	27.7159	31.2547	12.4289	20.2644	14.6577	21.6008	24.5081	26.3267	19.9178	4.68526	1.96303	2.35217	13.0007	2.35411	11.8469	0.419519	1.6826	0	0	1.53463	1.8028	3.25189	1.81814	0	4.65705	2.9988	0	0	0.562342	0	2.13527	0.973911	3.30776	0	0	0	4.57253
C02F12.9	C02F12.9	WBGene00015358	0	0	0	0	0	0	0	0	0	0	0	0	0	0	0	0	0	0	0	0	0	0	0	0	0	0	0	0	0	0	0	0	0	0	0	0	0	0	0	0	0	0	0	0	0	0	0
C02F4.1	ced-5	WBGene00000419	66.3837	68.6844	62.4818	40.8548	44.2754	73.4348	35.3771	40.7502	58.1998	51.386	57.9194	59.6282	83.6749	23.1082	20.2508	19.1615	25.6252	27.1811	28.9768	33.8884	41.5182	30.4328	61.756	61.2114	28.8077	35.5784	28.4945	30.7281	25.957	20.0071	19.5688	23.885	35.2722	35.696	23.4442	34.4713	36.6422	21.8107	43.2015	26.0617	28.2575	43.7187	85.3444	53.396	14.0051	49.0005	41.1093
C02F4.2	tax-6	WBGene00006527	8.1383	7.73687	6.98125	2.88434	0	2.74229	4.13763	1.0987	1.26756	0.881649	1.34442	1.13016	1.48249	1.81406	1.8002	2.28431	0.632987	2.30488	0.80936	0	0.9172	0	0	4.91589	0	0	0	0.894763	0	0.839022	0	1.63988	0.448697	1.19831	1.29569	0	0.633424	0	1.94543	2.81985	3.52964	0.862175	0.626765	1.07069	0	0	0
C02F4.4	C02F4.4	WBGene00007264	0	0	0	0	0	0	0	0	0	0	0	0	0	0	0	0	0	0.402108	0	0	0	0	0	0	0	0	0	0	0	0	0	0	0	0	0	0	0	0	0	0	0	0	0	0	0	0	0
C02F4.5	C02F4.5	WBGene00007265	0	0	0	0	0	0	0	0	0	0	0	0	0	0	0	0	0	0	0	0	0	0	0	0	0	0	0	0	0	0	0	0	0	0	0	0	0	0	0	0	0	0	0	0	0	0	0
C02F5.1	knl-1	WBGene00002231	6.10298	22.9178	8.92367	7.68211	9.14254	11.2019	5.08349	17.5259	18.3722	18.0128	19.2444	10.9375	8.59356	23.5304	27.2956	34.1622	23.1733	26.9639	26.4895	21.4172	6.28593	10.7315	14.1608	6.12091	12.8249	29.3779	18.6385	19.3616	24.3558	20.3906	12.4819	17.7514	16.9573	19.8148	15.8791	16.6248	24.9612	5.23265	15.1256	12.3221	12.1443	15.0009	9.34019	3.65114	11.9971	19.9334	30.9007
C02F5.10	C02F5.10	WBGene00015351	0	3.80949	0	0	10.008	11.6824	3.82249	1.10474	1.09403	0.989451	2.28049	2.15938	1.80912	0.91434	0.404826	0.74606	2.63894	4.1609	0.84876	1.66374	0	1.62032	1.20199	0.942699	0	2.07307	1.59702	0	0	0.76722	0	2.21417	1.15521	0	0.926679	1.39849	1.47935	1.98195	1.81296	0.819757	0.749543	0.607733	2.73795	3.43556	5.80703	2.07602	18.2104
C02F5.11	tsp-2	WBGene00006628	0	0	0	0	0	0	0	0.102904	0	0	0	0	0	0	0	0	0.632987	0	0	1.17145	2.22969	1.01287	0	0	0	0	0.798415	0	0	0	2.94111	0.72956	0.223847	0	0	0	0	0	0	0	0	0.237794	0	0.34911	0	0	0
C02F5.12	C02F5.12	WBGene00015352	6.8685	2.24864	7.62218	9.97534	9.14254	9.32605	26.2865	15.5495	15.577	18.57	15.8441	12.2122	20.8507	15.0164	16.2218	7.49722	11.7924	16.7672	11.3453	13.7763	7.0744	15.6226	13.3662	34.2739	9.34608	12.15	14.9068	11.9392	5.41248	16.1219	2.46059	11.8188	14.5991	10.5174	12.4215	18.9396	17.8737	17.49	10.2662	10.0439	12.5208	11.7537	10.4953	14.6475	14.0051	25.9683	37.4047
C02F5.13	C02F5.13	WBGene00015353	58.4894	66.8878	52.9635	69.6914	59.2673	75.3399	30.897	64.2306	69.0026	68.7553	75.7296	65.012	54.0957	24.2667	24.8172	23.6975	12.4775	28.7213	16.1612	18.7536	13.6599	17.4313	60.5089	39.7736	10.8668	10.9342	11.9791	12.5415	17.0034	13.6587	7.7362	15.25	11.8428	16.6974	15.3387	11.0103	14.5346	11.9053	12.3815	13.8898	16.0086	15.4055	58.5295	26.5596	12.3817	26.9731	16.9022
C02F5.14	C02F5.14	WBGene00044445	2.03383	7.11511	3.74324	2.62062	0	0	0	0.889037	0.50346	2.19619	0.431615	0	0.262177	0.91434	0	2.13397	0	1.94333	0.828683	0	1.18386	0.907762	0	0	0	0	0.798415	2.22773	1.77902	0	0	2.22852	0.329675	0.470654	1.45408	0.819649	0	1.0525	0	0	0.627574	0.451392	0	0	0	0	1.68977
C02F5.2	C02F5.2	WBGene00015345	0	0	0	2.52071	0	0	0	0	0	0	0.289588	0	0	0	0	0	0	0	0	0	0	0	0	0	0	0	0	0	0	0	0	0	0	0	0.291736	0.391033	0	0	0	1.63971	0	0	0	0	0	0	0
C02F5.3	C02F5.3	WBGene00015346	53.0417	43.5762	38.1572	50.7606	39.0627	43.105	37.6495	51.3861	54.3041	54.955	53.5612	47.5271	38.8084	60.1565	66.025	61.2917	62.0569	69.2564	56.6567	100.016	100.81	77.4563	64.7308	40.422	49.0485	56.0569	57.8541	59.0466	66.8352	71.0617	48.5456	72.6328	65.9337	64.8146	63.4241	66.2783	77.1171	77.5094	64.3263	68.2508	80.0375	68.5659	60.0679	52.2209	63.7699	73.5235	60.1712
C02F5.4	cids-1	WBGene00015347	157.644	187.604	174.483	90.6066	97.8179	106.034	111.426	41.2902	40.2603	45.6521	52.5078	84.244	117.495	35.4547	47.104	25.1338	39.9765	27.3759	38.6789	40.5547	34.3911	38.0699	62.3872	99.6057	43.8403	56.338	36.9282	58.6455	47.9413	37.7505	35.2768	27.566	45.6224	42.9381	43.8391	39.893	32.5862	52.3727	23.4029	25.1724	66.2997	54.9555	93.7395	99.8199	45.8249	34.1206	71.3373
C02F5.5	C02F5.5	WBGene00015348	0	0	0	0	0	0	0	0	0	0.311639	0.579247	0	0	0	0	0	0	0.202301	0.295398	0	1.04583	1.81574	0	0	0	0	0	0	0	0.839022	0	0	0	0.356548	0	0	0	0	0	0	0	0	0	0	0	0	0
C02F5.6	C02F5.6	WBGene00015349	28.5189	30.5614	25.1149	38.245	21.0768	34.4178	21.6628	72.9271	71.7923	48.2477	58.5558	44.4705	34.4324	85.4142	77.8863	90.8642	89.2131	86.512	85.1997	74.9667	72.8333	62.598	54.3092	27.9017	76.2797	55.6568	64.0109	55.6837	50.5169	66.9491	76.6236	64.7625	61.0327	66.8988	55.2388	55.1794	56.1879	38.6798	37.1305	21.0598	36.5856	40.8207	35.0111	30.83	0	5.7518	11.8849
C02F5.7	C02F5.7	WBGene00015350	0	4.19288	3.87078	0.263717	0	1.17111	1.261	0.457188	1.51421	1.26081	1.51839	2.47923	3.04667	1.88486	11.2987	6.85455	2.61039	3.13577	5.59864	1.0191	1.04583	3.41706	0	4.02865	2.93478	2.43173	6.01407	6.29208	7.9908	3.88794	1.8028	1.83067	1.97757	2.04271	5.64514	7.08574	0	0.526187	4.84893	1.00882	1.57863	0.8688	3.46247	5.33996	5.80703	12.3617	0
C02F5.8	tsp-1	WBGene00006627	0	0	0	0	0	0	0	0.136293	0	0	0	0	0	0	0	0	0.974521	0	0	0	0	1.01287	0.622063	0	0	0	0	1.11373	0	0.839022	0	0	0.332891	0	0	0	0	0	0.568984	0	0	0	0.626765	0	0	0	0
C02F5.9	pbs-6	WBGene00003952	112.605	118.942	122.724	360.17	354.742	348.917	312.181	451.829	438.849	412.935	432.338	503.291	419.483	197.467	173.87	199.747	171.678	219.451	181.184	198.487	102.491	130.89	325.773	297.038	44.0446	54.1046	62.2093	40.5851	36.3271	80.453	40.0235	35.7996	55.3404	45.3847	40.6042	41.8632	72.0823	45.8118	54.9277	16.4433	98.9317	104.598	256.329	263.353	18.1888	22.4387	16.6983
C02G6.1	C02G6.1	WBGene00015359	0	0	0	0	0	0	0	0	0	0	0	0	0	0	0	0	0	0	0	0	0	0	0	0	0	0	0	0	0	0	0	0	0	0	0	0	0	0	0	0	0.766797	0	0	0	0	0	0
C02G6.2	C02G6.2	WBGene00015360	0	0	0	0	0	0	0	0.143794	0	0	0	0	0	0	0.533593	0	0	0	0	0	0	0	0	0	0	0	0	0	0	0	0	0	0	0	0	0	0	0	0	0	0	0	0	0	0	0	0
C02G6.3	C02G6.3	WBGene00044803	0	0	0	0	0	0	0	0	0	0	0	0	0	0	0	0	0	0	0	0	0	0	0	0	0	0	0	1.02754	0	0	0	0	0	0	0	0	0.228094	0.405571	0	0	0	0	0	0	0	0	0
C02H6.1	C02H6.1	WBGene00015361	0	0	0	0	0	0	0	0	0	0	0	0	0	0	0	0	0	0	0	0	0	0	0	0	0	0	0	0	0	0	0	0	0	0	0	0	0	0	0	0	0	0	0	0	0	0	0
C02H6.2	fbxa-105	WBGene00015362	0	0	0	0	0	0	0	0	0	0	0	0	0	0	0	0	0	0	0	0	0	0	0	0.853508	0	0	0	0	0	0	0	0	0	0	0	0	0	0	0	0	0	0	0	0	0	0	0
C02H7.1	dyf-11	WBGene00001127	0	1.50734	1.68133	0	0	0	0	2.40246	1.33443	0.271359	0.592341	1.34694	0.786724	1.57498	0.533593	3.57761	1.03143	5.01619	2.96344	0	5.38707	0.783866	0.28603	0	3.37094	2.66696	0	1.9223	1.75289	7.3887	4.4122	0.610073	5.17409	2.25691	0	0	0	2.85958	0	5.29836	0	0.132087	2.79934	1.78177	0	0	0
C02H7.2	npr-19	WBGene00015364	0	0	0	0	0	0	0	0	0	0	0	0	0	0.91434	0	0	0	0	0	0	0	0	0	0	0	0	1.05571	0	0	0	0	0	0	0	0	0	0	0	1.25048	0	0	0	0	0	0	0	0
C02H7.3	aex-3	WBGene00000086	0	0	0	0	0	3.05731	0	0.702613	0.658723	0	1.64035	0.753346	0	0	1.9957	0.74606	1.14864	0.368254	0.245617	1.68795	0.9172	0.783866	1.3143	0	0	0	0.643177	0	0	1.67825	2.18634	1.64332	1.12246	0	0	2.15247	1.08187	1.0525	0.562342	0	4.26059	0	0	0.34911	0	0	0
C03A3.1	C03A3.1	WBGene00007266	0	1.50734	0	0	0	0	0	0	0	0.627422	0	0	0	0.843547	0	0	0	0	0	0	0	0	0.579929	0	0	0	0	0	0	0.76722	1.47037	0.610073	0.329675	0.448663	0	1.6395	0	0	0	0	0	0.319305	0	0	6.1901	0	0
C03A3.2	C03A3.2	WBGene00007267	37.8183	36.7943	55.8172	41.677	58.6675	35.3536	41.1048	26.0996	27.4371	29.8701	19.3767	53.0132	75.6102	15.5751	7.7814	6.5456	4.82441	5.77909	7.28771	1.17145	2.09192	3.31195	12.9021	77.6682	3.04036	5.62244	2.4787	9.40637	13.097	11.2004	9.78691	11.3435	8.92548	3.50404	1.64558	7.15487	4.76984	8.75302	8.49769	12.8212	5.57982	7.59677	26.5654	65.7585	0	3.67578	2.28599
C03A3.3	C03A3.3	WBGene00007268	0	0	0	0	0	0	0	0	0	0	0	0	0	0	0.404826	0	0	0	0	0	0	0	0	0	0	0	0	0	0	0	0	0	0	0	0	0	0	0	0	0	0	0	0	0	0	0	0
C03A7.10	srt-65	WBGene00015368	0	0	0	0	0	0	0	0	0	0	0	0	0	0	0	0	0	0	0	0	0	0	0	0	0	0	0	0	0	0	0	0	0	0	0	0	0	0.526187	0	0	0	0	0	0	0	0	0
C03A7.11	ugt-51	WBGene00015369	0	0	0	0	0	0	0	0.293565	0.580529	0.271359	0.291027	0	0	0.91434	0.404826	0	0	0	0	0.516505	0	0	0	0	0	2.15686	0	1.02754	0	0	0	0	0	0.780065	0	0	0.300071	0	3.32255	4.08188	0	0	0	0	0	0	0
C03A7.12	C03A7.12	WBGene00015370	0	0	0	0	2.0746	0	0	0.12722	1.58161	0.650504	0.289588	0	0	1.70174	1.15078	0	0	0.620995	2.40151	0.502594	0.9172	0	0	0	0	2.92163	0.798415	0	0	1.67825	0	0.610073	0.838912	1.91687	0.607777	0	1.12303	0.405571	0	0	0.766797	0.313154	0	0	0	0	0
C03A7.13	C03A7.13	WBGene00015371	0	0	0	0	0	0	0	0	0	0	0	0	0	0	0	0	0	0	0	0	0	0	0	0	0	0	0	0	0	0	0	0	0	0	0	0	0	0	0	0	0	0	0	0	0	0	0
C03A7.14	abu-8	WBGene00000031	0	0	0	0	0	0	0	0	0	0	0	0	0	0	0	0	0	0	0.245617	1.17145	0	0	0	0	0	0	0	0	0	0	0	0	0	0	0	0	0	0	0	0	0	0	0	0	0	0	0
C03A7.2	C03A7.2	WBGene00015366	0	0	0	0	0	0	0	0.143794	0	0.311639	0	0	0	0	0	1.34197	0	0.334459	0.295398	0.864842	1.83462	0	0.993775	0	0	0	0	0	0	0	0	0	0.327975	0	0	0	0	0	0	0.801719	0	0	0	0	0	0	0
C03A7.3	srw-140	WBGene00005887	0	0	0	0	0	0	0	0	0	0	0	0	0	0	0	0	0	0.668999	0	0	0	0	0	0	0	0	0	0	0	0	0	0	0	0	0	0	0	0	0	0	0	0	0	0	0	0	0
C03A7.4	abu-15	WBGene00004099	0	0	0	0	0	0	0	0	0	0	0	0	0	0	0	0	0	0	0	0	0	0	0	0	0	0	0	0	0	0	0	0	0	0	0	0	0	0	0	0	0	0	0	0	0	0	0
C03A7.5	srx-38	WBGene00005929	0	0	0	0	0	0	0	0	0	0	0	0	0	0	0	0	0	0	0	0	0	0	0	0	0	0	0	0	0	0	0	0	0	0	0	0	0	0	0	0	0	0	0	0	0	0	0
C03A7.6	srx-39	WBGene00005930	0	0	0	0	0	0	0	0	0	0	0	0	0	0	0	0	0	0	0	0	0	0	0	0	0	0	0	0	0	0	0	0	0	0	0	0	0	0	0	0	0	0	0	0	0	0	0
C03A7.7	abu-6	WBGene00000029	0	0	0	0	0	0	0	0	0	0	0	0	0	0	0	0	0	0	0	1.17145	0	0	0	0	0	0	0	0	0	0	0	0	0	0	0	0	0	0	0	0	0	0	0	0	0	0	0
C03A7.8	abu-7	WBGene00000030	0	0	0	0	0	0	0	0	0	0	0	0	0	0	0	0	0	0	0	0	0	0	0	0	0	0	0	0	0	0	0	0	0	0	0	0	0	0	0	0	0	0	0	0	0	0	0
C03A7.9	srt-64	WBGene00015367	0	0	0	0	0	0	0	0	0.208403	0.338864	0	0	0	0	0	0.74606	0	0.202301	0.426117	0	0	0	0	0	0	0	0	0	0	0	0	0	0.559326	0	0	0	0	0	0	0	0	0	0	0	8.19806	0	0
C03B1.1	C03B1.1	WBGene00015372	0	0	0	0	0	0	0	0	0	0	0	0	0	0	0	0	0	0	0	0	0	0	0	0	0	0	0	0	0	0	0	0	0	0	0	0	0	0	0	0	0	0	0	0	0	0	0
C03B1.10	C03B1.10	WBGene00015380	0	1.50734	3.49787	0	4.1497	11.6824	0	1.06006	0.578068	2.85979	0.838039	0.970315	0	1.75791	1.15078	8.98123	3.61376	2.56902	4.0516	1.67404	1.18386	3.18824	0	1.79621	0	2.2949	1.59893	2.00849	1.75289	1.39041	3.60648	1.61845	1.61086	2.57038	4.94132	13.5002	0.300071	6.58997	0	0	0.627574	0	0	2.38797	0	0	1.68977
C03B1.12	lmp-1	WBGene00003053	421.703	418.622	465.104	499.07	472.475	463.456	433.064	559.675	544.475	524.237	597.795	383.192	255.996	1033.45	925.216	1010.4	1055.73	1111.03	1047.02	1222.46	1336.17	1428.59	847.831	310.584	1537.46	1480.61	1593.84	1571.71	1537.62	1394.53	1591.54	1479.92	1416.28	1423.09	1554.98	1543.49	1353.18	1516.67	1582.07	1584.34	1570.87	1663.91	922.538	810.195	1484.53	1515.41	1489.83
C03B1.13	C03B1.13	WBGene00015381	0	0	0	0	0	0	0	0	0	1.35479	0.257424	0	0	1.8289	0.404826	3.77734	1.60751	0.804766	1.09924	0	8.40731	22.0281	0	0	13.4887	2.57637	2.93059	3.342	0	3.67211	5.78546	6.6051	0.985758	2.58455	0	0.460697	0.456244	0	125.794	111.718	0.749543	0	0	6.99845	0	0	0
C03B1.14	C03B1.14	WBGene00015382	0	0	0	0	0	0	0	0	0	0	0	0	0	0	0.745857	0.792007	0	0	0	0	6.30471	1.56792	0	0	0	0	0	0	0	0	0	0	0	0.470654	0	0	0	0	11.3375	2.4959	0	0	0	0	0	0	0
C03B1.2	C03B1.2	WBGene00015373	0	0	0	0	0	0	0	0	0	0	0	0	0	0	0	0	0.632987	0	0	0	0	0	0.579929	0	0	0	0	0	0	0	0	0	0	0	0	0	0	0	0	0	0.766797	0	0	0	0	0	0
C03B1.3	C03B1.3	WBGene00015374	0	0	0	0	0	0	0	0	0	0	0	0	0	0	0	0	0	0	0	0	0	0	0	0	0	0	0	0	0	0	0	0	0	0	0	0	0	0	0	0	0	0	0	0	0	0	0
C03B1.4	C03B1.4	WBGene00015375	0	0	0	0	0	0	0	0	0	0	0.364358	0	0	0	0	0	0	0.402108	0	0	0	0	0	0	0	0	0	1.11373	0	0	0	0	0	0	0	0.443315	0	0	0	0	0	0	0	0.34911	0	0	0
C03B1.5	C03B1.5	WBGene00015376	0	0	0	0	0	3.05731	0	0	0	0	0	0	0	0	0	0	0	0.202301	1.70509	1.17145	1.18386	0	0.496827	0	0	0	0	0	0	0	0	0	0	0	0	0	0	0	0	0	0	0	0.936157	2.38797	0	0	0
C03B1.6	C03B1.6	WBGene00015377	0	0	0	0	0	0	0	0	0	0	0	0	0	0	0	1.58421	0	0	0	0	0	0	0	0	0	0	0	0	0	0	0	0	0	0	0	0	0	0	0	0	0	0	0	0	0	0	0
C03B1.7	C03B1.7	WBGene00015378	5.99052	11.6146	10.9877	0.527499	4.64887	0.936776	6.71757	7.18771	6.03635	4.34762	8.31662	9.29841	11.4018	10.3988	4.60832	7.796	3.95642	3.74185	5.23146	3.39246	27.4652	55.8134	4.62838	12.5078	1.51999	12.0934	7.92642	7.01512	9.82426	10.6746	18.204	14.8086	3.78694	9.65722	6.33148	5.53683	7.81952	12.8567	47.4605	54.559	3.87545	6.29459	3.05881	7.45294	36.9819	8.78908	7.95248
C03B1.9	C03B1.9	WBGene00015379	0	0	0	0	0	0	0	0	0	0	0	0	0	0	0	0	0	0	0	0	0	0	0	0	0	0	0	0	0	0	0	0	0	0	0	0	0	0	0	0	0	0	0	0	0	0	0
C03B8.2	C03B8.2	WBGene00015385	0	0	0	0	0	0	0	0.599838	0.245476	0.311639	0.364358	0	0	0	0	0.792007	0.974551	0.411622	0	0	0	1.62032	0	0	0	1.49782	0.543223	1.02754	1.75289	0	0.90129	0	0.557741	0	0	2.2692	0.228094	0	1.13133	0.504349	0.685921	0.945	0.337356	0	0	0	0
C03B8.3	C03B8.3	WBGene00015386	0	0	0	0	0	0	0	0	0.249654	0.311639	0	0	0	0.843547	0.341031	0	0	0	0.33084	0	0	0	0.496827	0	0	0	0	0	0	0	0	0	0	0.234464	0	0	0	0	1.13811	0	0	0.812356	0	0	0	0	0
C03B8.4	lin-13	WBGene00003002	27.4941	37.0392	37.3481	51.5724	36.5871	57.9544	25.4535	86.6171	92.2429	83.0548	70.0842	51.8674	38.6094	147.552	136.975	121.575	131.928	133.962	157.808	149.043	134.445	152.775	91.4383	44.0843	196.458	218.647	168.195	188.549	212.593	200.675	170.368	185.584	216.605	215.536	220.608	211.149	150.107	174.503	128.379	120.772	181.296	209.351	73.6716	84.8194	329.734	302.901	317.501
C03C10.1	kin-19	WBGene00002202	496.465	833.177	700.394	311.48	436.539	452.716	356.859	282.92	243.818	294.055	259.385	285.573	328.673	288.105	243.855	309.222	250.769	319.608	263.541	231.484	166.762	200.215	275.51	384.428	315.119	305.988	249.777	300.916	344.683	257.524	169.997	264.43	274.322	293.163	292.358	323.309	223.65	265.486	218.428	267.799	212.998	228.912	268.73	514.955	315.105	284.485	312.556
C03C10.2	C03C10.2	WBGene00007269	0	0	0	0	0	0	0	0	0	0	0	0	0	0	0	0	0	0	0	0	0	0	0	0	0	0	0	0	0	0.76722	0	0	0.279629	0.805212	0	0	0.540871	0	0	0.504349	0	0.132087	1.70889	0	0	0	0
C03C10.3	rnr-2	WBGene00004392	1100.49	779.006	914.908	1371.88	958.206	1252.94	1269.14	1954	1856.74	1713.18	1930.1	1638.42	1331.16	2317.13	2345.02	2201.03	2670.7	2293.86	2602.49	2357.21	2526.68	2190.74	2151.52	1177.45	2373.88	2282.76	2434.66	2383.24	1989.38	2022.51	2489.51	2297.54	2192.88	2278.52	2245.79	2264.88	2022.81	1922.45	1643.85	1318.97	1291.18	1380.51	886.354	1609.2	713.814	685.721	598.852
C03C10.4	C03C10.4	WBGene00007270	40.7713	41.9594	52.4095	115.587	53.1701	98.7623	95.1737	173.489	158.282	150.847	138.693	114.668	109.499	104.073	87.4395	85.0507	71.7354	93.3206	63.0033	59.8738	27.0455	41.91	108.428	137.341	45.0265	38.1056	34.2249	39.4111	31.2448	36.9212	52.7705	37.7421	42.399	47.8517	33.1315	33.8942	45.7886	41.7731	26.8566	35.3955	37.0686	63.9055	104.551	91.2416	42.7889	63.593	65.5451
C03C10.5	C03C10.5	WBGene00007271	0	0	0	0	0	0	0	0	0	0	0	0	0	0	0	0.792007	0	0	0	0	0	0	0	0	0	0	0	1.03784	0	0	0	0	0	0	0	0.304604	0	0	0	0	0	0	0	0	0	0	0
C03C10.7	C03C10.7	WBGene00007273	3.43383	8.54507	14.751	5.14133	22.752	8.07428	8.96362	0.295413	0	0	1.63729	0.772887	2.61328	0.970518	0.533593	0	0	0.54378	0.383242	2.22615	0	3.24103	0	0	0	0	0	1.02754	0	0	0	0.72956	0	0.470654	0	0.476979	2.08218	0	0	0	0.986701	0	1.52271	0	0	0	1.68977
C03C10.9	C03C10.9	WBGene00185075	0	0	0	0	0	0	0	0	0	0	0.257424	0	0	0	0	0.792007	0.974551	0.404651	0	0.864842	0	0	0	0	0	0.764779	0.639352	0	0	0	0	0.733	0.22485	0.448663	0	0.304604	0	0	0	0	0.811831	0.945	0.772733	0	0	0	0
C03C11.1	C03C11.1	WBGene00007274	0	0	0	0	0	0	0	0	0	0	0	0	0	0	0	0	0	0	0	0.502594	0	0	0	0	0	0	0.643177	0	0	0	0	0.511496	0.22485	0	0.413695	0	0	0	0.68814	1.63971	0.685921	5.22736	0	0	0	0	0
C03C11.2	fog-3	WBGene00001483	0	1.12418	1.81653	0.263717	2.0746	0	0	0.398266	1.33254	0.966286	0.653946	2.01365	1.98684	0	0	0	0	0	0	0	0	0	0	0	0	0.419519	0.543223	0	0	0	2.84435	1.10695	0	0	0.247903	0	0	0	0	0	0	0	0.772733	0	0	0	0
C03D6.1	C03D6.1	WBGene00007275	0	0	0	0	0	0	0	0.0831624	0.491011	0	1.16609	2.11992	0.379964	0	0	0	0.515653	0.604409	1.05865	0.516505	0	0	0	0	0	0	0	0	0	0	0	0	0.332311	0	0	0	0	0	0.562342	0	0	0	0.337356	0	0	0	0
C03D6.3	cel-1	WBGene00000466	73.5326	57.2023	80.2257	60.8023	33.6967	49.7257	79.5399	31.8567	33.491	29.4682	40.5567	36.8877	24.9135	29.096	48.5621	41.255	32.0441	33.0056	28.3858	35.724	29.8181	29.6636	43.4694	26.4311	29.1339	33.1865	31.5446	29.1635	36.7269	39.2149	41.4725	33.9065	41.4841	46.5453	31.9042	38.2877	38.5891	30.528	24.522	23.3057	45.9726	52.5097	41.4857	30.8129	28.3953	34.0221	16.0886
C03D6.4	npp-14	WBGene00003800	203.798	287.854	224.592	234.084	216.44	232.928	124.292	176.258	158.524	134.963	122.446	108.192	58.6595	102.724	87.7602	94.9374	80.8659	96.8793	83.1366	64.1741	25.73	29.6419	83.6037	34.7576	51.2352	53.6958	46.5851	47.3569	66.7309	43.6124	49.9807	45.0798	48.0343	51.0933	55.9674	52.5953	50.0551	77.3918	57.8985	45.8419	37.8119	55.6802	61.4331	37.1332	165.508	154.907	127.28
C03D6.5	asfl-1	WBGene00007277	16.996	14.18	11.494	24.1322	15.7422	18.5701	36.1195	29.8896	32.3742	37.5584	34.0052	50.9867	41.205	19.8032	33.006	30.54	25.3908	27.5962	30.1785	30.1968	24.779	27.7227	31.4297	31.4229	43.8369	20.0438	17.1017	8.83591	17.2877	31.4827	21.1674	27.0465	18.0191	21.5976	17.5407	22.8016	23.1732	12.2745	19.4723	14.6807	24.2028	17.4789	26.8025	41.5153	0	4.53332	6.85964
C03D6.6	lab-1	WBGene00007278	65.3301	30.8864	38.2009	34.9301	62.3741	34.66	34.1934	37.5083	34.3781	32.6944	32.4162	26.5467	20.2442	24.5628	19.5077	22.2569	22.8905	32.021	22.5824	22.9805	24.3976	32.6978	22.0175	26.1633	25.1111	14.8474	17.8081	12.2719	24.3541	18.6632	18.4944	22.1551	18.0403	18.9436	10.9021	6.87111	15.7152	14.9512	8.27324	6.94844	13.5006	11.4253	18.898	27.7438	0	4.53332	1.68977
C03D6.8	rpl-24.2	WBGene00004437	32.601	37.4582	37.652	38.6915	22.8336	49.5089	27.0926	91.3231	81.8841	114.364	99.5959	80.7381	66.8833	122.86	95.0196	102.702	82.8546	121.103	100.358	130.651	150.066	159.289	115.581	61.703	82.4384	125.465	121.764	135.02	119.035	122.852	126.269	122.487	130.68	128.113	137.763	119.513	172.382	137.575	126.669	186.224	162.153	164.764	97.4449	83.2076	112.647	154.588	164.769
C03E10.1	C03E10.1	WBGene00007279	0	0	0	0	0	0	0	0	0	0	0	0	0	0	0	0	0	0	0	0	0	0	0	0	0	0	0	0	0	0	0	0	0	0	0	0	0	0	0	0	0	0	0	0	0	0	0
C03E10.3	C03E10.3	WBGene00007281	0	0	0	0	0	0	0	0	0	0	0	0	0	0	0	0	0	0	0	0	0	0	0	0	0	0	0	0	0	0	0	0	0.258851	0	0	0	0	0	0	0	0	0	0	0	0	0	0
C03E10.4	gly-20	WBGene00001645	95.8969	65.3904	72.4561	115.339	119.691	112.717	152.067	53.8241	54.8112	70.1942	54.5271	93.2427	235.277	34.7385	37.6014	25.1235	18.0599	24.5293	29.582	33.9269	29.2528	45.2592	40.9592	223.039	39.9051	20.5167	22.2268	13.1716	31.4901	21.5842	50.0297	33.0346	26.2653	34.6202	28.1507	17.1894	35.8969	37.9969	19.9816	35.259	32.7871	29.7897	70.9746	236.368	28.3953	17.9054	6.76598
C03E10.5	clec-223	WBGene00007282	0	0	0	0	0	0	0	0	0	0	0	0	0	0	0	0	0	0	0	0	0	0	0	0	0	0	0	0	0	0	0	0	0	0	0	0	1.91968	0	0	0	0	0	0	0	0	0	0
C03E10.6	clec-222	WBGene00007283	0	0	0	0	0	0	0	0	0	0	0	0	0	0	0	0	0	0	0	0	0	0	0	0	0	0	0	0	0	0	0	0	0	0	0	0	0	0	0	0	0	0	0	0	0	0	0
C03F11.1	kcnl-3	WBGene00015387	0	0	0	0	0	0	0	0	0	0	0	0	0	0	0	0	0	0	0	0	0	0	0	0	0	0	0	0	0	0	0	0	0	0	0	0	0	0	0	0	0	0	0	0	0	0	0
C03F11.2	C03F11.2	WBGene00015388	0	0	0	0	0	0	0	0	0	0	0	0	0	0	0	0	0	0	0	0	0	0	0	0	0	0	0	0	0	0	0	0	0	0	0	0	0	0	0	0	0	0	0	0	0	0	0
C03F11.3	scav-1	WBGene00015389	0	0	0	0	0	0	0	0	0	0	0	0	0	0.91434	0	0	0	0	0.245617	0	0	0	0	0	0	0	0	0	0	0	0	0	0	0.280663	0	0.391033	0	0	0	0.504349	0	0	0	0	0	4.53332	0
C03F11.4	C03F11.4	WBGene00015390	0	0	0	0	0	0	0	0	0.571299	0.627422	0	0	0.642142	2.36276	0.533593	1.43787	0	4.79391	0.245617	0	2.36801	1.01287	0	0	0	0	0	0	1.77902	1.67825	1.28505	0	1.1054	0	0	0	0.300071	0	0.68814	0	0	1.11113	0	0	0	0	0
C03G5.1	sdha-1	WBGene00015391	34.6428	40.8849	46.7863	51.3639	58.74	49.727	43.9419	58.3892	52.9464	55.8857	63.4197	66.2686	55.0961	56.8389	47.7418	55.5837	56.5047	57.3116	55.0378	61.5178	49.2482	55.3945	50.9923	45.0273	44.5853	50.742	45.342	45.0224	55.2805	39.3043	53.3696	53.8316	46.164	50.3004	52.8756	62.5719	44.074	40.4281	41.4429	42.7611	32.5954	42.0782	48.0371	30.6874	46.2052	48.6195	51.6489
C03G5.10	nspc-3	WBGene00044338	0	0	0	0	0	0	0	0	0	0	0	0	0	0	0	0	0	0	0	0	0	0	0	0	0	0	0	0	0	0	0	0	0	0	0	0	0	0	0	0	0	0	0	0	0	0	0
C03G5.11	nspc-4	WBGene00044339	0	0	0	0	0	0	0	0	0	0	0	0	0	0	0	0	0	0	0	0	0	0	0	0	0	0	0	0	0	0	0	0	0	0	0	0	0	0	0	0	0	0	0	0	0	0	0
C03G5.12	nspc-5	WBGene00044340	0	0	0	0	0	0	0	0	0	0	0	0	0	0	0	0	0	0	0	0.492291	0	0	0	0	0	0	0	0	0	0	0	0	0	0	0	0	0	0	0	0	0	0	0	0	0	0	0
C03G5.13	nspc-6	WBGene00044357	0	0	0	0	0	0	0	0	0	0	0	0	0	0	0	0	0	0	0	0.492291	0	0	0	0	0	0	0	0	0	0	0	0	0	0	0	0	0	0	0	0	0	0	0	0	0	0	0
C03G5.2	nspc-7	WBGene00015392	0	0	0	0	0	0	0	0	0	0	0	0	0	0	0	0	0	0	0	0	0	0	0	0	0	0	0	0	0	0	0	0	0	0	0	0	0	0	0	0.801719	0	0	0	0	0	0	0
C03G5.7	flp-5	WBGene00001448	0	0	0	0	0	0	0	0	0.171365	1.66643	0.592341	0	0	0	0	0	0	0.202301	0	1.17145	0	0	0	0	0	1.0783	0	0	0	0	0	0	0	0	0.388213	0.89377	2.16428	2.3334	0	0	2.12155	0.626385	0	0	0	0	0
C03G5.8	nspc-1	WBGene00023477	0	0	0	0	0	0	0	0	0	0	0	0	0	0	0	0	0	0	0	0	0	0	0	0	0	0	0	0	0	0	0	0	0	0	0	0	0	0	0	0.801719	0	0	0	0	0	0	0
C03G5.9	nspc-2	WBGene00044337	0	0	0	0	0	0	0	0	0	0	0	0	0	0	0	0	0	0	0	0	0	0	0	0	0	0	0	0	0	0	0	0	0	0	0	0	0	0	0	0	0	0	0	0	0	0	0
C03G6.10	nhr-148	WBGene00015396	0	0	0	0	0	0	0	0	0	0	0	0.376627	0.262177	0	0	0	0	0	0	0	0	0	0	0	0	0	0	0	0	0	0	0	0.448697	0.234464	0	0	0	0.405571	0	0	0	0.638689	0	0.34911	0	0	0
C03G6.11	srh-231	WBGene00005439	0	0	0	0	0	0	0	0	0	0	0	0	0	0	0	0	0	0	0	0	0	0	0	0	0	0	0	0	0	0	0	0	0	0	0	0	0	0	0	0	0	0	0	0	0	0	0
C03G6.12	nhr-149	WBGene00015397	0	0	0	0	0	0	0	0	0	0	0	0	0	0	0	0	0	0	0	0	0	0	0	0	0	0	0	0	0	0	0	0	0	0	0	0	0	0	0.68814	1.00882	0	0	0	0	0	0	0
C03G6.13	tag-293	WBGene00015398	0	0	0	0	0	0	0	0	0	0	0	0	0	0	0	0	0	0	0	0	0	0	0	0	0	0	0	0	0	0	0	0	0	0	0	0	0	0	0	0	0	0	0	0	0	0	0
C03G6.14	cyp-35A1	WBGene00015399	0	0	0	0	0	0	0	0	0	0	0	0	0	0	0	0	0	0	0	0	0	0	0	0	0	0	0	0	0	0	0	0	0	0	0	0	0	0	0	0	0	0	0	0	0	0	0
C03G6.15	cyp-35A2	WBGene00015400	0	0	0	0	0	0	0	0	0	0	0	0	0	0	0	0	0	0	0	0	0	0	0	0	0	0	0	0	0	0	0	0	0	0	0	0	0	0	0	0	0	0	0	0	0	0	0
C03G6.16	srsx-24	WBGene00015401	0	0	0	0	0	0	0	0	0	0	0	0	0	0	0	0	0	0	0	0	0	0	0	0	0	0	0	0	0	0	0	0	0	0	0	0	0	0	0	0	0	0	0	0	0	0	0
C03G6.17	C03G6.17	WBGene00015402	0	0	0	0	0	0	0	0	0	0	0	0	0	0	0	0	0	0	0	0	0	0	0	0	0	0	0	0	0	0	0	0	0	0	0	0	0	0	0	0	0	0	0	0	0	0	0
C03G6.18	srp-5	WBGene00005646	0	0	0	0	0	0	0	0	0	0	0	0	0	0	0	0	0	0	0	0	0	1.62032	0	0	0	0	0	0	0	0	0	0	0	0	0	0	0	0	0	0	0	0	0	0	0	0	0
C03G6.19	srp-6	WBGene00005647	4.06816	0	5.43471	0.791346	0	0.936776	1.261	2.22792	2.30838	2.77744	3.12822	3.23498	3.52044	0.843547	2.13515	0	0	0.604409	1.23664	1.89798	4.73717	1.79674	1.63592	4.45343	5.87029	1.0783	2.23638	3.25526	1.35263	1.14071	1.47037	0	0	2.72862	0.194083	2.46945	1.16552	1.39643	0	10.1907	5.07262	2.99646	2.67301	3.83001	0	0	0
C03G6.2	srx-56	WBGene00005947	0	0	0	0	0	0	0	0	0	0	0	0	0	0	0	0	0	0	0	0	0	0	0	0	0	0	0	0	0	0	0	0	0	0	0	0	0	0	0	0	0	0	0	0	0	0	0
C03G6.3	srj-14	WBGene00005602	0	0	0	0	0	0	0	0	0	0	0	0	0	0	0	0	0	0	0	1.17145	0	0	0	0	0	0	0	0	0	0	0	0	0	0	0	0	0	0	0	0	0	0	0	0	0	0	0
C03G6.5	C03G6.5	WBGene00015393	0	0	0	0	0	0	0	0	0	0.542784	0	0	0	0	0	0	0	0	0	0	0	0	0	0	0	0	0	0	0	0	0	0	0	0	0	0	0	0	0	0	0	0	0	0	0	0	0
C03G6.6	C03G6.6	WBGene00015394	0	0	0	0	0	0	0	0	0	0	0	0	0	0	0	0	0	0	0	0	0	0	0	0	0	0	0	0	0	0	0	0	0	0	0	0	0	0	0	0	0	0	0	0	0	0	0
C03G6.7	srh-275	WBGene00005480	0	0	0	0	0	0	0	0	0	0	0	0	0	0	0	0	0	0	0	0	0	0	0	0	0	0	0	0	0	0	0	0	0	0	0	0	0	0	0	0	0	0	0	0	0	0	0
C03G6.8	nhr-147	WBGene00015395	0	0	0	0	0	0	0	0	0	0	0	0	0	0	0	0	0	0	0	0	0	0	0	0	0	0	0	0	0	0	0	0	0	0	0	0	0	0	0	0	0	0	0	0	0	0	0
C03G6.9	srh-244	WBGene00005450	0	0	0	0	0	0	0	0	0	0	0	0	0	0	0	0	0	0	0	1.17145	0	0	0	0	0	0	0	0	0	0	0	0	0	0	0	0	0	0	0	0	0	0	0	0	0	0	0
C03H12.1	C03H12.1	WBGene00007284	13.7404	17.0794	16.4485	15.7362	25.8805	31.5937	4.73512	16.7357	16.3378	20.7167	20.4449	13.3986	12.792	15.3356	14.4026	20.8931	15.6181	20.1221	12.1465	13.7585	6.29455	30.3504	11.9476	13.6189	6.0822	16.0279	11.8285	13.3007	10.4801	5.55231	15.0045	17.4081	15.6243	10.3875	14.0261	11.2025	17.3623	11.2062	19.1972	14.5481	8.82512	14.6895	16.0868	9.74246	26.0036	32.0238	26.0014
C03H5.1	clec-10	WBGene00015403	0	0	0	0	0	0	0	0.102904	0	0	0	0	0	0	0	0	0	0	0	0	0	0	0	0	0	0	0	0	0	0	0	0	0	0	0	0	0.300071	0	0	0	0	0	0	0	0	0	0
C03H5.2	nstp-4	WBGene00015404	11.9898	7.06247	7.23385	7.1126	2.41908	18.355	20.9929	4.23586	5.67392	12.5344	20.2027	42.3206	69.1007	6.97736	1.21574	3.32622	7.95948	4.98018	7.1339	7.65524	9.31451	10.6129	32.1046	54.0119	0	5.51281	7.28173	12.5204	20.0117	5.49458	9.05226	1.2445	4.17806	10.2134	10.2522	6.7324	8.64332	8.25682	7.78136	12.3894	9.07356	11.0097	24.4808	57.1472	0	7.18983	6.24859
C03H5.3	C03H5.3	WBGene00015405	52.2119	36.4509	40.7444	50.0178	47.0261	34.7396	44.7206	58.9916	57.8302	70.7559	58.9943	62.6631	52.661	54.9045	54.7914	64.9078	50.0083	73.0516	59.1662	49.2555	66.7595	58.9119	73.851	60.0663	56.45	41.189	45.1973	42.8511	71.6383	51.2028	47.1442	56.6114	48.426	61.1096	44.3441	58.9491	62.0299	55.7675	43.2699	32.5825	72.7881	58.1604	62.8846	63.6877	54.4073	57.57	49.8709
C03H5.4	C03H5.4	WBGene00015406	0	0	0	0	0	0	0	0.16076	0	0	0	0	0	0.970518	0	0.792007	0.632987	0	0.33084	1.0088	0	0	0.470541	0	0	0	1.69888	2.14126	3.13164	0	0	3.23757	0.870791	1.88644	0.247903	1.07025	0.756315	0.405571	0.562342	0	2.38107	3.32251	0	0	0	0	1.68977
C03H5.5	C03H5.5	WBGene00015407	0	0	1.80887	0	0	0	0	0.680333	1.27618	0.271359	0.302753	0.39626	0	0.970518	1.21477	0.595905	0	0	0	0	0	0	1.40492	0	0	0	3.76355	0	0	1.34295	1.8028	1.10695	0.607604	3.08286	1.4781	1.8757	1.14495	1.45807	0.562342	0	0.986701	0.319305	0	0	0	4.15255	0
C03H5.6	C03H5.6	WBGene00015408	0	0	0	0	0	0	0	0	0	0	0	0	0	0	0	0	0	0	0	0	0	0	0	0	0	0	0	0	0	0	0	0	0	0	0	0	0	0	0	0	0	0	0	0	0	0	0
C03H5.7	C03H5.7	WBGene00015409	0	0	0	0	0	0	0	2.92193	3.58285	6.67878	2.24593	0	0	36.7407	29.0289	30.7888	22.5844	29.9433	31.7351	12.9176	5.783	11.6395	0.28603	0	19.4543	28.1379	24.8383	29.0971	27.6143	33.887	18.2336	12.3607	26.239	14.9701	21.4116	21.2409	13.3167	9.16576	5.48091	12.0193	5.55918	4.56885	0.761264	2.01367	0	5.7518	3.08471
C03H5.9	C03H5.9	WBGene00206366	0	0	0	0	0	0	0	0.10173	0.192642	0	0	0	0	0.970518	0	0.792007	1.63584	1.18165	3.44314	0	0	0	0	0	2.93478	0	0.798415	2.14126	1.75289	1.60624	0	0	0.365595	0	1.11883	1.27252	0.861518	0	0.568984	0	0	0	0	0	0	0	0
C04A11.1	C04A11.1	WBGene00007285	0	0	0	0	0	0	0	0.249995	0.192642	0	0.60558	0	0.379964	0	0	0	0	0	0	2.90134	0	0	0.579929	0	0	0	0	0	0	1.39041	4.92178	0	1.56761	0.561394	0	0	0.228094	0	0.68814	0	0	0	0	2.38797	0	0	0
C04A11.2	C04A11.2	WBGene00007286	4.99149	7.18287	3.6254	9.7637	18.2879	8.14261	8.21861	28.3898	21.3753	19.149	19.6533	17.7006	14.0784	24.196	29.679	32.5989	29.1376	20.1883	24.0188	38.2392	32.0184	22.708	25.2101	28.6375	26.6333	29.8012	23.2032	17.0116	19.9088	15.0287	28.1867	19.2042	24.3711	20.5345	16.1252	8.58718	27.1329	41.3922	11.6061	14.6199	23.0204	32.1348	10.8497	9.79653	20.5798	68.6179	71.866
C04A11.3	gck-4	WBGene00007287	0	2.24864	0	0	3.28399	0.234108	0.315135	2.86042	5.46731	1.08583	1.92669	1.81437	2.92886	2.85561	5.51261	3.62664	0.487201	4.9195	3.93998	2.76303	0	5.16261	3.50043	6.64269	0	0.764779	1.59702	1.02754	0	0.839022	0	2.36962	0.77943	2.30716	2.02619	1.26296	0.333352	0	1.94543	1.32411	0.766797	1.00419	0.337356	1.44334	0	0	11.3204
C04A11.4	adm-2	WBGene00000074	17.1775	21.0609	17.8439	25.104	31.2693	27.0521	15.3349	17.6107	21.2039	19.222	14.559	20.9645	13.5139	1.63094	5.93334	4.27265	4.19049	6.13051	3.47157	1.89798	2.10106	5.33794	7.94614	18.1314	0	2.74506	3.11258	3.99824	3.10551	1.90793	3.8424	2.33237	3.17438	4.79774	2.61805	4.44797	5.15552	6.79426	5.34066	3.63961	2.0371	4.87518	9.59299	24.5507	0	6.60935	1.68977
C04A11.5	C04A11.5	WBGene00007288	0	0	0	0	0	0	0	0	0	0	0	0	0	0	0	0	0	0	0	0	0	0	0	0	0	0	0	0	0	0	0	0	0	0	0	0	0	0	0	0	0	0	0	0	0	0	0
C04A2.1	tbc-6	WBGene00015410	4.06816	3.90104	3.63351	1.58327	2.0746	2.10903	5.08349	6.03337	6.79453	4.92055	9.43375	4.02575	2.66565	8.7912	5.91598	5.30678	4.96024	6.70345	2.27316	21.028	3.13827	8.98233	3.95541	3.47033	3.04036	15.423	11.8204	10.245	6.23749	8.08506	19.3343	4.7842	10.0957	10.0631	11.6158	10.7637	18.591	30.6233	6.24443	8.59731	8.04275	4.92115	5.04756	7.36622	6.1901	3.03728	2.27284
C04A2.15	C04A2.15	WBGene00206529	0	0	0	0	0	0	0	0.102904	0	0	0.364358	0	0	0.91434	0	0	0	0	0	0	0	0	0.622063	0	0	0	0	0	0	0	0	0	0.365595	0	0	0	0	0	0	0	0	0	0	0	0	0	0
C04A2.3	egl-27	WBGene00001194	44.7053	34.1204	36.2756	70.8128	57.6707	53.5708	52.05	79.5595	69.6014	58.0878	66.9006	86.9915	72.2268	66.9821	90.8482	77.2083	108.905	64.3981	83.4855	100.423	134.786	98.4058	75.148	89.2506	139.418	169.297	132.287	158.464	159.065	122.603	136.236	139.442	150.527	141.096	114.567	114.105	120.264	157.33	161.071	183.077	142.336	131.313	103.253	105.475	155.294	199.108	189.076
C04A2.7	dnj-5	WBGene00001023	483.524	465.448	352.967	545.77	369.39	383.027	389.341	474.348	450.962	324.978	301.107	276.854	323.582	259.002	247.463	264.784	278.626	281.838	249.791	237.031	91.315	86.7835	299.091	338.315	66.4816	97.9252	57.682	99.4297	77.6949	78.6224	62.796	69.4327	70.6517	86.0837	68.5941	61.0974	110.913	75.8497	71.9107	70.7829	91.8864	102.461	285.866	385.362	48.9821	85.8978	82.7424
C04B4.1	C04B4.1	WBGene00007289	0	0	0	0	0	0	0	0	0	0	0	0	0	0	0	0	0	0	0	0	0	0	0	0	0	0	0	0	0	0	0	0	0	0	0	0	0	0	0	0	0	0	0	0	0	0	0
C04B4.2	C04B4.2	WBGene00007290	308.652	297.985	320.927	165.668	194.171	225.577	250.076	39.102	36.5968	39.6278	37.9136	144.556	352.263	5.26028	4.93933	3.56856	8.09754	6.2172	8.88607	3.33807	2.36801	2.5808	12.3467	224.67	4.56109	5.57047	0	3.11429	1.75289	3.82693	0.90129	2.54351	1.96291	2.8965	3.3865	2.60869	6.89079	2.04336	2.85448	10.1907	2.12684	9.60127	86.2273	109.39	0	0	0
C04B4.3	lips-2	WBGene00007291	0	0	0	0	0	0	0	0	0	0	0	0	0	0	0	0	0	0	0	0	0	0	0	0	0	0	0	0	0	0	0	0	0	0	0	0	0	0	0	0	0	0	0	0	0	0	0
C04B4.4	C04B4.4	WBGene00007292	0	0	0	0	0	0	0	0	0	0	0	0	0	0	0	0	0	0	0	0	0	0	0	0	0	0	0	0	0	0	0	0	0	0	0	0	0	0	0	0	0	0	0	0	0	0	0
C04B4.5	C04B4.5	WBGene00007293	0	0	0	0	0	0	0	0	0.399934	0.271359	0	0	0	0	0	0	0	0	0	0	0	0	0	0	0	0	0	0	0	0	0	0	0	0	0	0	0	0	0	0	0	0	0	0	0	0	0
C04B4.6	C04B4.6	WBGene00007294	0	0	0	0	0	0	0	0	0	0	0	0	0	0	0	0	0	0	0	0	0	0	0	0	0	0	0	0	0	0	0	0	0	0	0	0	0	0	0	0	0	0	0	0	0	0	0
C04C11.1	C04C11.1	WBGene00007295	0	0	0	0	0	0	0	0	0	0	0	0	0	0	0	0	0	0	0	0	0	0	0	0	0	0	0	0	0	0	0	0	0	0	0	0	0	0	0	0	0	0	0	0	0	0	0
C04C11.2	arrd-25	WBGene00007296	6.8685	3.06842	5.69542	5.93268	4.1497	1.87447	25.971	8.77751	10.3359	9.89549	8.98124	5.69808	4.5703	11.3243	8.71486	7.49722	7.03275	5.49672	3.90617	1.66374	19.8472	7.41172	13.9692	6.08862	1.51999	1.60392	0	0	3.84181	1.34295	2.94111	2.19574	1.57768	3.36329	1.54549	3.09852	1.78956	0	76.3129	58.8606	3.57073	6.68114	12.1822	21.0272	0	0	0
C04C3.1	srz-60	WBGene00015411	0	0	0	0	0	0	0	0	0.182698	0.677812	0	0	0	3.51626	0	0	0.487201	0	0.755536	0	0	0	1.11889	0	0	3.51888	1.23537	0.894763	0	0	1.8028	2.37288	1.87163	0.713184	0.695701	1.92675	0.809352	0	0	0.801719	0	0	0.936157	0	0	0	0
C04C3.2	lgc-9	WBGene00015412	0	0	0	0	0	0.234108	0	0.10173	0.385331	0.627422	0	0	0.379964	0	1.12095	0.841967	0	0.202301	0.295398	0	1.04583	0.783866	0	0	0	0	0	1.11373	0	0	0	0	0	0.836437	0	0	0	0	0.568984	0	0	0.319305	0	0	0	0	4.55882
C04C3.3	pdhb-1	WBGene00015413	301.925	451.475	285.925	235.533	290.017	171.859	203.179	49.2511	54.6977	58.8828	58.5685	78.5926	79.8865	26.2784	28.0882	31.871	20.4931	31.4337	23.6265	33.6014	15.6136	30.3959	34.4979	93.4458	13.474	22.6304	16.8448	13.034	26.3041	15.4015	15.0644	21.0036	24.0982	16.6466	21.2919	16.5342	32.8244	20.7003	14.0139	9.25549	25.0639	19.3215	52.5134	82.1042	17.8056	8.15132	23.5031
C04C3.4	C04C3.4	WBGene00015414	0	0	0	0	0	0	0	0	0	0	0.655385	0.39626	0	0.91434	0	1.53807	0.974551	1.02574	0	0	0	0	0	0	0	0	0.798415	1.02754	1.75289	0	0.90129	0.733	0.912798	0.365783	0	1.36305	0	0.990855	0.568984	0.504349	0	0.945	0	0	0	0	0
C04C3.5	dyf-3	WBGene00001119	0	0	0	0	0	0.234108	0	0.666395	0.498937	0.338864	1.03719	0.844404	0	1.57498	0	0	0	1.86603	0.748554	0	0	0	0	0	0	0	1.05571	0	0	0	1.5593	0.733	1.61224	0	1.79293	0	0	2.3334	0	0	0.749543	0.870253	0.761264	0	6.1901	0	0
C04C3.6	C04C3.6	WBGene00015416	0	0	0	0	0	0	0	0	0	0	0	0	0	0	0	0	0	0	0	0	0	0	0	0	0	0.764779	0	2.22773	0	0	0	0	0	0	0	0	0	0	0	0	0	0	0	0	0	0	0
C04C3.7	C04C3.7	WBGene00015417	0	0	0	0	0	0	0	0	0	0	0	0	0	0	0	0	0	0	0	0	0	0	0	0	0	0	0	0	0	0	0	0	0	0	0	0	0	0	0	0	0	0	0	0	0	0	0
C04C3.9	C04C3.9	WBGene00195067	0	0	0	0	0	0	0	0	0	0	0	0	0	0	0	0	0	0	0	0	0	0	0	0	0	0	0	0	0	0	0	0	0	0	0	0	0	0	0	0	0	0	0	0	0	0	0
C04D8.1	pac-1	WBGene00015418	92.0176	153.355	121.762	105.077	140.234	122.92	85.1704	46.8064	42.5812	56.3393	32.4676	22.2668	23.6595	50.8119	40.326	66.3905	49.5723	49.0681	55.8368	88.2954	24.2994	36.2695	45.0994	35.882	21.1966	31.1642	20.4518	29.1503	22.8608	53.8549	28.6796	16.4757	33.0093	29.0206	24.9029	31.5992	35.5319	21.5081	37.5298	43.8122	24.2665	22.36	19.1899	21.5795	0	23.0759	11.3254
C04E12.10	C04E12.10	WBGene00015439	0	0	0	0	0	0	0	0	0	0	0	0	0	0	0	0	0	0	0	0	0	0	0	0	0	0	0	0	0	0	0	0	0	0	0	0	0	0	0	0	0	0	0	0	0	0	0
C04E12.11	arrd-20	WBGene00015440	0	0	0	0	0	0	0	0	0	0	0	0	0.262177	0	0	0	0	0	0	0	0	0	0	0	0	0	0	0	0	0	0	0	0	0	0	0	0	0	0	0	0	0	0.337356	0	0	0	0
C04E12.12	arrd-21	WBGene00015441	0	0	0	0	0	0	0	0	0	0	0	0	0	0	0	0	0	0	0	0	0	0	0	0	0	0	0	0	0	0	0	0	0.332311	0	0	0	0	0	0	0	0	0	0	0	0	0	0
C04E12.2	C04E12.2	WBGene00015433	0	0	0	0	0	0	0	0	0	0	0	0	0	0	0	0	0	0.602465	0	0	0	0	0	0	0	0	0	1.03784	0	0	0	0	0	0	0.413695	0.528259	0	0	0	0	0	0	0	0	0	0	0
C04E12.4	C04E12.4	WBGene00015434	0	0	0	0	0	0	0	0	0	0	0	0	0	0	0	0	0	0	0	0	0	0	0	0	0	0	0	0	0	0	0	0	0	0	0	0	0.604075	0	0	0	0	0	0	0	0	0	0
C04E12.5	C04E12.5	WBGene00015435	0	0	0	0	0	0	0	0	0	0	0	0	0	0	0	0	0	0	0	0	0	0	0	0	0	0	0	0	0	0	0	0	0	0	0	0	0	0	0	0	0	0	0	0	0	0	0
C04E12.6	C04E12.6	WBGene00015436	0	0	0	0	0	0	0	0	0	0	0	0	0	0	0	0	0	0	0	0	0	0	0	0	0	0	0	0	0	0	0	0	0	0	0	0	0	0	0	0	0	0	0	0	0	0	0
C04E12.7	scrm-3	WBGene00015437	0	0	0	0	0	0	0	0	0	0	0	0	0.760021	0	0	0	0	0	0	0	0	0	0.28603	0	0	0	0	0	0	0	0	0	0	0	0	0	0	0	0	0	0	0	0	0	0	0	0
C04E12.8	srx-121	WBGene00006012	0	0	0	0	0	0	0	0	0	0	0	0	0	0	0	0	0	0	0	0	0	0	0	0	0	0	0	0	0	0	0	0	0	0	0	0	0	0	0	0	0	0	0	0	0	0	0
C04E12.9	srbc-2	WBGene00015438	0	0	0	0	0	0	0	0.102904	0	0	0	0	0	0	0	0	0	0	0	0	0	0	0	0	0	0	0	0	0	0	0	0	0	0	0	0	0	0	0	0	0	0	0	0	0	0	0
C04E6.10	srd-15	WBGene00005093	0	0	0	0	0	0	0	0	0	0	0	0	0	0	0	0	0	0	0	0	0	0	0	0	0	0	0	0	0	0	0	0	0	0	0	0	0	0	0	0	0	0	0	0	0	0	0
C04E6.11	C04E6.11	WBGene00015425	27.0268	26.7812	22.7322	11.1418	9.14254	12.9273	17.2418	0.66174	1.02518	0.627422	0.560177	0.844404	2.97291	3.77018	1.55387	0	0	0.770363	1.74959	0	0	0.907762	0	0	0	0	1.28651	2.05532	3.81568	0	0.90129	1.42182	0.866036	0.448663	2.36504	0	2.07755	0	0.68814	0.801719	1.37201	0	1.54565	2.73708	0	4.53332	0
C04E6.13	C04E6.13	WBGene00015427	0	0	0	0	0	0	0	0.271097	0.123789	0.610223	1.12076	0	0.262177	1.75789	0	0	0	0.209321	0	0	0	0	0	0	0	0	0	0	0	0	0	0.511496	0.279629	0	1.8352	0.443315	0	0	0	0	0.928353	0.887717	0	0	0	0	0
C04E6.2	srsx-18	WBGene00015419	0	0	0	0	0	0	0	0	0	0	0	0	0	0	0	0	0	0	0	0	0	0	0	0	0	0	0	0	0	0	0	0	0	0	0	0	0	0	0	0	0	0	0	0	0	0	0
C04E6.3	C04E6.3	WBGene00015420	0	0	0	0	0	0	0	0	0	0	0	0	0	0	0	0	0	0	0	0	0	0	0	0	0	0	0	0	0	0	0	0	0	0	0	0	0	0	0	0	0	0	0	0	0	0	0
C04E6.4	C04E6.4	WBGene00015421	0	0	0	0	0	0	0	0	0	0	0	0	0	0	0	0	0	0	0	0	0	0	0	0	0	0	0	0	0	0	0	0	0	0	0	0	0	0	0	0	0	0	0	0	0	0	0
C04E6.5	C04E6.5	WBGene00015422	0	0	0	0	0	0	0	0	0	0	0	0	0	0	0	0	0	0	0	0	0	0	0	0	0	0	0	0	0	0	0	0	0	0	0	0	0	0	0	0	0	0	0	0	0	0	0
C04E6.6	grd-9	WBGene00001698	0	0	0	0	0	0	0	0	0	0	0	0	0	0	0	0	0	0	0	0	0	0	0	0	0	0	0	0	0	0	0	0	0	0	0	0	0	0	0	0	0	0	0	0	0	0	0
C04E6.7	C04E6.7	WBGene00015423	1.99586	0	1.68133	0	0	0	0	0	0	0.627422	0	0	0	0	0	0	0.974551	0	0	0	0	0	0	0	0	0	0	0	0	0	0	0	0	0	0	0	0.228094	0	0	0	0	0.132087	0.337356	0	0	0	0
C04E6.8	C04E6.8	WBGene00015424	0	0	0	0	0	0	0	0	0	0	0	0	0	0	0	0	0	0	0	0	0	0	0	0	0	0	0	0	0	0	0	0	0	0	0	0.304604	0	0	0	0	0	0	0	0	0	0	0
C04E6.9	srd-16	WBGene00005094	0	0	0	0	0	0	0	0	0	0	0	0	0	0	0	0	0	0	0	0	0	0	0	0	0	0	0	0	0	0	0	0	0	0	0	0	0	0	0	0	0	0	0	0	0	0	0
C04E7.1	C04E7.1	WBGene00015428	0	0	0	0	0	0	0	0.168193	0.182698	0	0	0	0	0.970518	0	0	0.632987	2.39666	0	0.492291	1.04583	0	0	0	0	0.419519	0	0	0	1.53463	0	0	1.25117	0	0	0	0	0	0	0	0	0	0	0.721584	0	0	0
C04E7.2	sor-3	WBGene00015429	16.2846	17.9392	7.61452	27.4068	24.2162	28.1931	18.0862	48.9895	38.9748	36.0371	42.2123	39.5464	36.9846	59.6086	60.3742	46.8293	53.5551	48.2973	48.1987	47.559	35.4938	34.1552	35.0333	42.5518	46.1126	37.2123	44.5751	50.4355	58.6402	41.914	40.0259	42.9325	53.7876	50.9948	55.5948	47.9477	48.9497	62.6378	49.8358	72.7007	42.3506	44.8497	38.2137	46.1081	78.0385	57.6877	59.955
C04E7.3	C04E7.3	WBGene00015430	0	0	0	0	0	0	0	1.42437	0.616488	2.73715	3.437	1.15192	0	8.73545	5.40171	7.69278	5.36805	8.18288	6.3272	6.93373	9.70137	2.82862	2.55704	0	0	6.87137	0.639352	4.37984	2.06279	5.54011	0	1.46256	6.70574	5.05944	3.12316	2.41726	12.7794	2.93727	6.85482	0.801719	10.1103	3.43054	3.14651	0	6.1901	4.15255	3.37995
C04E7.4	C04E7.4	WBGene00015431	0	0	0	0	0	0	0	1.443	1.21521	0.650504	0.870274	0	0	10.1154	8.55759	9.126	4.24708	5.67863	4.40763	5.99531	3.13827	3.03936	0.572129	3.04202	4.89093	10.279	7.64952	2.14126	0	4.97659	7.07083	11.4439	12.3837	11.2847	4.90248	3.20939	12.1658	17.8181	9.20363	3.76594	6.89143	7.21162	0.936157	7.51477	8.19806	10.2851	3.37995
C04E7.5	C04E7.5	WBGene00045270	0	0	0	0	0	0	0	0	0	0	0	0	0	2.48932	0.341031	1.43787	0.487201	1.02419	0.502117	0	0.9172	0	0	0	0	2.85605	2.08094	1.11373	3.55847	1.34295	3.02967	0.733	0.503476	1.41231	2.61314	0.304604	0.540871	0	0	0	0	0	0	0	0	0	0
C04F1.1	C04F1.1	WBGene00015442	0	0	0	0	0	0	0	0	0	0	0	0	0	0	0	0	0	0	0	0	0	0	0	0	0	0	0	0	0	0	0	0	0	0	0	0	0	0	0	0	0	0	0	0	0	0	0
C04F1.3	lim-7	WBGene00002989	0	0	0	0	0	0	0	0.143794	0	0.271359	0	0	0	1.94127	0.533593	5.0565	0.974521	0	0	0	0	0	0	0	70.738	8.65177	22.1089	0	27.2581	0	0	0	0	0	0.568734	0	0	0	0	0	0	0	0	0	0	0	3.66778
C04F12.1	C04F12.1	WBGene00007297	20.6156	19.4471	13.8455	26.4382	34.7075	19.284	45.8574	30.0847	28.2623	26.566	25.0352	47.2365	72.2335	9.76246	10.6842	9.49055	11.9655	8.62815	9.05453	4.02631	11.3923	5.82183	12.2695	68.9465	1.51999	8.76371	2.79112	2.06538	7.25773	4.07663	4.92178	7.59823	9.39227	7.23997	5.91749	7.50497	7.54967	8.33932	6.38893	0	3.0864	2.50494	35.9865	77.0877	6.1901	0	10.4896
C04F12.10	fce-1	WBGene00001405	43.1274	39.8018	34.7748	8.98189	21.8863	23.2058	14.941	3.08711	1.97092	2.49869	1.35171	2.71086	4.3974	0	0.682146	2.38004	0.515653	1.05774	0.858829	4.20291	0.9172	1.56792	0	2.44354	1.51999	4.38529	4.79544	9.84358	7.25773	1.60624	10.4037	6.36991	2.84516	6.51776	4.49697	6.07796	5.73238	9.79529	14.5465	12.1678	2.40031	5.07517	5.43862	2.7902	35.6184	37.5787	28.6755
C04F12.12	C04F12.12	WBGene00077685	0	0	0	0	0	0	0	0	0	0	0	0	0	0	0	0	0	0	0	0	0	0	0	0	0	0	0	0	0	0	0	0	0	0	0	0	0	0	0	0	0	0	0	0	0	0	0
C04F12.16	C04F12.16	WBGene00219286	0	0	0	0	0	0	0	0	0	0	0	0	0	0	0	0	0	0	0	0	0	0	0	0	0	0	0	0	0	0	0	0	0	0	0	0	0	0	0	0	0	0	0	0	0	0	0
C04F12.3	ikb-1	WBGene00002069	0	0	0	0	0	0	0	0	0	0	0	0	0	0	0	0	0	0	0	1.54989	0	0	0	0	0	0.90198	0	0	0	0	1.28505	0	0	0	0	0	0.604075	0.526187	0	1.00882	0	0	0	0	0	0	0
C04F12.4	rpl-14	WBGene00004426	8.1383	2.24864	8.79779	10.5603	20.4086	14.8157	7.90154	54.6928	61.0165	67.5625	70.6495	52.6401	37.8151	78.2475	95.4425	96.2372	98.229	92.0918	93.8857	120.911	117.989	96.2743	101.582	42.9467	113.453	135.729	150.275	163.226	174.919	166.071	158.192	178.7	168.827	166.261	156.806	146.556	151.897	171.393	119.315	198.615	233.996	203.67	117.672	74.9929	234.676	176.689	252.002
C04F12.5	C04F12.5	WBGene00007299	30.9347	17.9904	21.731	27.7223	41.3482	23.2474	29.2374	40.9739	41.7894	58.0944	50.9469	45.3013	44.4323	40.7752	28.2428	37.6657	23.4457	38.4285	36.9739	29.5221	40.0246	27.8675	42.8896	33.2884	27.6117	18.3655	20.5225	16.4789	24.6158	30.0055	25.4802	20.9334	23.6467	27.2928	18.9464	23.0555	27.8491	26.2374	28.1815	8.82603	35.1717	29.0166	55.009	40.1332	0	2.07602	1.68977
C04F12.6	C04F12.6	WBGene00007300	0	0	0	0	0	0	0	0.184893	0	0	0	0.359305	0	0	0	0	0	0.368254	0	0.864842	0	0	0	0	0	0	0.543223	0	0	0	0	0	0	0	0.194083	0	0.885387	0	0	0	0	0.264206	0.936157	0	11.6155	0	1.39494
C04F12.7	C04F12.7	WBGene00007301	0	0	0	0	0	0	0	0.16076	0	0	0.364358	0	0	0	0	0	0	0	0	0	0	0	0.470541	0	0	0	0	0	0	0	0	0	0	0	0	0	0	0	0	0	0	0	0	0	0	0	0
C04F12.8	C04F12.8	WBGene00007302	0	0	0	0	0	0	0	0	0	0	0	0	0	0	0	0	0	0	0	0	0	0	0	0	0	0	0	0	0	0	0	0	0	0	1.31794	0.89377	0.333352	0	0	0	0	0	0.626765	0	0	0	0
C04F12.9	rnh-1.3	WBGene00007303	0	0	0	0	0	0	0	0	0	0	0.289588	0	0	0	0.587355	0	0.515653	0	0	0	0	0	0	0	0	1.80418	0	0	0	2.18197	0	2.1923	0.985705	0	0.194083	0	0.333352	0	0	0	0	0	0.626765	0	0	0	0
C04F2.1	srh-79	WBGene00005300	0	0	0	0	0	0	0	0	0	0	0	0	0	0	0	0	0	0	0	0	0	0	0	0	0	0	0	0	0	0	0	0	0	0	0	0	0	0	0	0	0	0	0	0	0	0	0
C04F2.4	srh-229	WBGene00005437	0	0	0	0	0	0	0	0	0	0	0	0	0	0	0	0	0	0	0	0	0	0	0	0	0	0	0	0	0	0	0	0	0	0	0	0	0	0.81124	0	0	0	0	0	0	0	0	0
C04F5.1	sid-1	WBGene00004795	58.4894	42.6363	64.6308	32.4369	46.4303	62.8731	75.7659	17.6694	21.2825	13.1787	21.7268	46.3096	43.4352	12.4927	11.9694	13.5406	12.2275	11.2962	12.1445	1.88394	5.63408	4.52069	9.33149	53.5966	16.3045	9.1032	7.85166	10.3992	10.2488	3.58618	7.20493	8.9465	8.4657	6.19931	11.2481	9.24044	4.05257	6.71566	3.06389	4.45957	4.96958	10.2221	22.5894	39.6661	0	2.07602	0
C04F5.2	C04F5.2	WBGene00015444	0	0	0	0	0	0	0	0	0	0	0	0	0	0	0	0	0	0	0	0	0	0	0	0	0	0	0	0	0	0	0	0	0	0	0	0	0	0	0	0	0	0	0	0	0	0	0
C04F5.3	unc-46	WBGene00006782	0	0	0	0	0	0	0	0	0	0	0	0	0	0	0	0	0	0	0	2.34318	0	0	0	0	0	0	0	0	0	0	0	0	0	0	0	0	0	0	0	0	0	0	0	0	0	0	0
C04F5.4	srab-1	WBGene00015446	0	0	0	0	0	0	0	0	0	0	0	0	0	0	0	0	0	0	0	0	0	0	0	0	0	0	0	0	0	0	0	0	0.332311	0	0	0	0	0	0	0	0	0	0	0	0	0	0
C04F5.5	srab-2	WBGene00015447	0	0	0	0	0	0	0	0	0	0	0	0	0	0	0	0	0	0	0	0	0	0	0	0	0	0	0	0	0	0	0	0	0	0	0	0	0	0	0	0	0	0	0	0	0	0	0
C04F5.6	srab-3	WBGene00015448	0	0	0	0	0	0	0	0	0	0	0	0	0	0	0.682146	0	0	0	0	0	0	0	0	0	0	0	0	0	0	0	0	0	0	0	0	0	0	0	0	0	0	0	0	0	0	0	0
C04F5.7	ugt-63	WBGene00015449	0	0	0	0	0	0	0	0.923256	0.489037	0	0	0	0	0	0	0	0	1.12484	0.661761	1.17145	1.04583	0	0	0	0	0	0	0	0	0	0	1.2445	0	0.380654	0	0.593272	0	0	0	0	0	0	0	0	0	0	0
C04F5.8	C04F5.8	WBGene00015450	27.0268	33.2145	32.1859	32.8967	26.5934	36.7742	44.4034	48.0868	51.9583	51.4577	45.7537	36.6939	37.7088	72.1972	59.8162	66.2712	64.9904	44.3909	50.6934	65.6441	62.808	54.1443	39.1682	35.5701	52.9838	45.5394	46.0961	50.1344	32.7922	73.2089	56.8264	71.9156	60.2723	53.2244	58.0175	66.5868	71.0789	39.5859	45.3551	45.048	81.3783	62.7646	38.7401	54.2601	31.4347	33.4251	23.4414
C04F5.9	C04F5.9	WBGene00015451	10.304	2.24864	8.79779	2.90444	6.56878	8.2997	9.24389	6.16886	5.16803	3.63808	6.35673	5.76761	12.4463	0.91434	4.49851	2.83463	6.48616	3.59249	1.04485	5.11565	3.00912	0.783866	3.40614	7.75082	2.93478	1.1843	5.02058	0.894763	6.26405	3.90903	0.90129	4.75976	3.52889	7.61179	5.86876	2.65373	3.34096	9.35657	0.568984	5.92855	4.79991	3.85059	7.40531	11.9148	6.1901	6.60935	8.80883
C04F6.1	vit-5	WBGene00006929	0	0	0	0	0	0	0	0	0.249654	1.52214	0	0	0.262177	1.70174	1.2695	0	0.487201	0.202301	0	0	9.56404	4.83684	1.49084	0	0	4.5121	3.98199	1.02754	1.77902	0	6.6961	6.18687	0	4.64193	0.535286	1.78025	1.68595	2.3334	7.05183	8.44395	1.43941	1.33462	0.936157	1.39695	8.19806	8.30713	2.28599
C04F6.3	cht-1	WBGene00000503	18.3224	16.1246	5.69542	31.4683	16.0842	18.6662	16.2578	66.8053	49.7798	54.4524	118.006	22.6099	11.441	168.579	209.241	157.873	303.543	220.191	295.521	250.598	375.822	503.797	203.023	30.5365	243.234	502.305	480.159	628.88	271.424	283.292	819.445	923.904	259.295	423.26	481.928	626.162	344.902	651.292	677.421	930.445	493.758	640.335	160.242	190.487	1036.19	1927.34	2168.68
C04F6.4	unc-78	WBGene00006810	8.1383	6.15024	9.30392	20.9281	12.7734	18.2899	7.90154	39.1062	38.5386	33.4913	43.3667	40.0399	35.9987	43.9429	37.7758	41.5106	52.6705	49.6396	57.3164	46.6021	46.7222	39.4534	39.5303	27.9074	23.9201	43.8682	45.8326	47.5305	25.0253	32.6143	37.8049	33.811	34.3286	41.1082	30.6073	28.9296	36.152	33.9926	24.5665	8.59072	42.1591	42.0607	28.0351	31.2095	16.3981	5.1133	5.95377
C04F6.5	dhs-27	WBGene00000990	8.1383	1.50734	7.50429	4.2039	6.22531	4.61721	6.66148	2.31229	3.5694	2.387	3.27142	3.93559	8.03765	0	1.86681	1.58803	3.07018	1.32338	1.67447	5.96424	0	2.82862	2.22944	4.79359	2.93478	1.0783	2.27324	0	3.10551	1.39041	0	2.70379	1.54379	1.40268	0.722232	1.33206	0.881329	0	0.568984	0.819757	1.43546	1.39272	4.1376	8.10051	0	0	0
C04F6.7	C04F6.7	WBGene00195081	0	0	0	0	0	0	0	0	0.285472	0	0	0	0	0	0	0	0	0	0	0	0	0	0	0	0	0	0	0	0	0	0	0	0	0	0	0	0	0	0	0	0	0	0	0	0	0	0
C04G2.1	ttr-39	WBGene00007304	0	2.63152	0	0	0	0	0	0	0	0.311639	0	0	0	0	0	0	0	0	0	0	0	0	0	0	0	0	0	0	0	0	1.28505	0	0.329675	0	0	0	0	0	0	0	0	0.132087	0	0	0	2.07602	0
C04G2.10	C04G2.10	WBGene00007309	0	0	0	0	0	0	0	0	0.914155	0	0.560177	0	0	0.970518	0	0.74606	0	0.202301	0	0.516505	0	0.783866	0.622063	0	0	1.77775	0.596023	0	0	0	0.90129	0	0	0	0.535286	0.443315	0.300071	0	0	0	2.9471	0	0	0	0	0	0
C04G2.11	C04G2.11	WBGene00007310	0	0	0	0	0	0	0	0	0	0	0	0	0	0	0	0	0	0.54378	0	0	0	0	0	0	0	0	0	0	0	0	0	0	0	0	0.413695	0	0	0	0	0	0	0	0	0	0	0	0
C04G2.2	C04G2.2	WBGene00007305	0	0	0	0.263717	0	0.234108	0	0	0.249654	0	0.364358	0.376627	0.262177	0	2.92322	1.38791	4.64542	2.46349	0.701942	1.35713	1.18386	0.907762	0.993775	0	0	6.10059	2.71694	10.8852	5.5947	5.06286	10.06	8.61455	7.73173	5.01977	4.8858	6.83913	1.89986	10.5144	4.54081	2.4959	5.50865	6.44797	2.50798	0.698306	24.7695	14.1811	3.08471
C04G2.4	msp-36	WBGene00003432	0	0	0	0	0	0	0	0	0	0.311639	0	0	0	0	0.404826	0	0	1.0201	0.776281	0	0	0	0	0	0	0	2.19495	0	1.35263	0	1.47037	0.910325	0.889001	0.615118	0.568734	1.2131	0.300071	0	0	0	0	0.472442	0	0	0	0	1.39494
C04G2.5	C04G2.5	WBGene00007306	0	0	0	0	0	0	0	0	0	0	0	0	0	0	0	0	0	0	0	0	0	0	0.408688	0	0	0	0	0	0	0	0	0	0	0	0.357944	0	0	0	0	0	0	0	0	0	0	0	0
C04G2.6	dis-3	WBGene00001001	86.0983	86.3714	67.0422	89.6766	44.5999	58.3664	30.6305	54.8934	53.7134	21.521	10.229	13.5944	11.4828	32.3686	21.8996	19.5149	25.1861	24.2341	20.4314	12.6769	0	0	5.88048	21.6427	21.303	13.5662	4.95904	2.90347	5.90511	12.3195	9.14794	6.17558	8.17288	11.7088	8.22845	10.5138	7.66024	6.03108	5.74753	6.65909	3.7139	1.47663	5.2116	6.27085	24.3819	22.9714	12.721
C04G2.7	egl-38	WBGene00001204	0	0	0	0	0	0	0	0	0	0	0	0	0	0	0	0	0	0	0	0	0	0	0	0	0	0	0	0	0	0	0	0	0	0	0	0	0	2.3334	0	0	0	0	0	0	0	0	0
C04G2.8	C04G2.8	WBGene00007307	0	0	0	0	0	0	0	0.136293	0	0	0.257424	0.376627	0	1.94127	0	0	0	0	0.445441	0.492291	0.9172	0	0.470541	0	0	0	0.639352	2.05532	0	2.30222	0	0.72956	1.26409	1.43569	2.26433	1.72812	0	1.0525	0	0.504349	0.685921	1.89046	0	0	0	0	0
C04G2.9	C04G2.9	WBGene00007308	0	0	0	0	0	0	0	0	0	0	0	0	0	0	0	0	0	0	0	0	0	0	0	0	0	0	0	0	0	0	0	0	0	0	0	0	0	0	0	0	0	0	0	0	0	0	0
C04G6.1	mpk-2	WBGene00003402	0	0	0	0	0	0	0	0	0	0	0.291027	0	0	0	0	0	0	0	0	0	0	0	0	0	0	0	0	0	0	0	0	0	0.332311	0	0	0	0	1.0525	0	0	0	0	0	0	0	0	0
C04G6.10	C04G6.10	WBGene00015458	0	0	0	2.52071	0	0	0	0	0	0	0	0	0	0	0	0	0	0	0	0	0	0	0	0	0	0	0	0	1.75289	0	0	0	0	0	0	0	0	0	0	0	0	0	0	0	0	0	0
C04G6.11	C04G6.11	WBGene00015459	0	0	0	0	0	3.05731	0	0	0	0	0	0	0	0	0	0	0	0	0	0	0	0	0	0	0	0	0	0	0	0	0	0	0	0	0	0	0	0	0	0	0	0	0	0	0	0	0
C04G6.13	C04G6.13	WBGene00077489	0	0	0	0	0	0	0	0	0.123597	0.311639	0	0	0	0	0	0	0	0	0	0	0	0.783866	0	0	0	0	0	0	0	0	0	0	0.329675	0	0	0	0.228094	0	0	0	0	0	0	0	0	0	0
C04G6.2	C04G6.2	WBGene00015453	0	0	0	0	0	0	0	0	0	0	0	0	0	0	0	0	0	0	0	0	0	0	0	0	0	0	0	0	0	0	0	0	0	0	0	0	0	0	0	0	0	0	0	0	0	0	0
C04G6.3	pld-1	WBGene00004040	20.6156	22.5845	12.5495	11.196	14.658	27.9154	22.9085	8.87054	8.84252	14.8965	14.278	22.5347	24.2111	2.72841	5.1014	2.73002	1.03143	2.20589	1.59053	5.91701	2.75227	2.47568	31.0418	18.3733	0	2.15686	1.82973	1.03784	0	1.60624	0	2.15138	2.51111	6.47946	4.66075	0.443315	6.25914	6.97624	2.51456	1.51342	10.6794	6.43719	21.9602	14.0197	0	7.18983	0
C04G6.4	C04G6.4	WBGene00015454	50.9953	40.657	34.0553	31.2666	44.1828	36.9568	53.3153	21.8951	23.2648	31.2551	24.3522	46.1256	76.7314	6.59633	9.85251	2.97251	3.64228	4.8429	6.16601	5.64882	5.89054	6.45716	20.3716	32.385	6.0822	3.04562	2.32195	1.9326	3.41542	5.45649	4.22616	2.34801	4.40488	4.18114	1.28262	1.41534	3.41804	1.21701	1.25048	1.00882	2.60648	3.45401	34.0251	43.0858	0	9.06775	1.39494
C04G6.5	C04G6.5	WBGene00015455	0	0	0	0	0	0	0	0	0	0	0	0	0	0	0	0	0	0	0	0	0	0	0	0	0	0	0	0	0	0	0	0	0	0	0.413695	0.593272	0	0	0.562342	0	0	0	0	0	0	0	0
C04G6.6	C04G6.6	WBGene00015456	0	0	0	0	0	0	0	0	0.245476	0	0	0	0	0	0	0.74606	0	0	0	0	0	0	0	0	0	0	0	0	0	0	0	0	0.279629	0	0	0	0.228094	1.06288	0	0	0	0	0	0	0	0	0
C04G6.7	C04G6.7	WBGene00015457	0	0	0	0	0	0	0	0	0	0.271359	0	0	0	0	0	0	0	0	0	0	0	0	0	0	0	0	0	0	1.75289	0	0	0	0	0	0	0	0	0	0	0	0	0	0	0	0	0	0
C04H4.1	C04H4.1	WBGene00007311	0	0	0	0	0	0	0	0	0	0	0	0	0	0	0	0	0	0	0	0	0	0	0	0	0	0	0	0	0	0	0	0	0	0	0	0	0	0	0	0	0	0	0	0	0	0	0
C04H5.1	C04H5.1	WBGene00007312	0.997811	3.06842	1.80887	2.52071	1.20939	0.234108	0	2.01621	0.359745	0.271359	1.8915	1.48946	2.39369	1.75791	0.341031	0.74606	2.98077	1.60719	1.26855	1.85973	5.11041	1.69163	1.2534	0.942699	4.89093	1.74112	0	1.11373	2.06279	4.66595	0	2.32725	2.22336	3.69017	3.40943	1.29904	2.14602	1.58907	0.568984	9.89334	0	1.12838	1.38803	4.77652	14.0051	11.8271	11.652
C04H5.2	clec-147	WBGene00007313	0	0	0	0	0	0	0	0	0	0	0	0	0	0	0	0	0.487201	0	0	0	0	0	0	0	0	0	0	0	0	0	0	0	0	0	0	0	0	0	0	0	0	0	0	0	0	0	0
C04H5.3	gcy-29	WBGene00007314	0	0	0	0	0	0	0	0	0	0	0	0	0	0	0.404826	0	0	0	0.235491	0	0	0	0	0	0	0.90198	0	0	0	0	0	0	0	0	0.357944	0.391033	0	0	0	0	0	0	0	0	0	0	0
C04H5.6	mog-4	WBGene00003392	24.0544	33.5135	42.9239	31.6409	44.0818	46.6721	44.6261	86.7074	104.417	91.2118	82.0961	71.3419	44.6522	95.3286	84.0486	117.397	84.557	89.6579	96.8192	91.1076	57.6612	68.2043	84.7036	73.9116	81.611	87.42	63.937	89.8262	119.178	83.7185	78.3689	86.4359	100.351	81.6598	81.4743	87.1777	77.8599	78.5357	46.6021	53.961	84.7418	77.9005	57.802	40.3927	87.2874	89.322	109.406
C04H5.7	C04H5.7	WBGene00007315	0	0	0	0	0	0	0	0	0	0	0	0	0	0	0	0.792007	0	0	0	0	0	0	0	0	0	0	0	0	0	0	0	0	0	0	0	0	0	0	0	0	0	0	0	0	0	0	0
C04H5.8	nlp-41	WBGene00007316	0	0	0	0	0	0	0	0.802675	0	4.11629	0.580615	0.485098	0	5.44352	0.682146	2.52652	2.52186	0.653332	0.921708	7.59407	3.92655	3.71762	0	0	0	0.419519	4.40326	1.03784	0	0.76722	3.3621	1.63988	0.591162	0.466789	0.582391	1.33027	7.28434	13.2545	2.06493	2.92774	0	0.451392	0	0	0	0	0
C05A2.1	pph-1	WBGene00004083	0	0	0	0	0	0	3.82249	0	0.171365	0.542784	0	0.359305	0	0	0	0	0	0	0	0	0	0	0	0	0	0	0	0	0	0	0	0	0	0	0	0	0	0	0	0	0	0	0	0	0	0	0
C05A9.1	pgp-5	WBGene00003999	0	0	0	0	0	0	0	0	0	0	0	0	0	0	0	0	0	0	0	0	0	0	0	0	0	0	0	0	0	0	0	0	0	0	0	0	0	0	0	0	0	0	0	0	0	0	0
C05A9.2	C05A9.2	WBGene00007317	0	0	0	0	0	0	0	0.310139	0	0	0	0	0	0.787395	1.02334	1.43787	0.515653	0	0	0	0	0	0	0	0	0	0.643177	1.02754	0	1.39041	0	2.07263	0.890052	0.365783	2.58123	0	0	0	0.562342	0.504349	0	0.472442	0	0	0	3.67578	0
C05B10.1	lip-1	WBGene00003043	1.99586	0	0	0.263717	1.20939	0.468274	0.630346	0.707505	0.530948	1.66643	0	1.61526	5.77588	0	0	0	0	0.53676	0.235491	1.17145	0	2.35217	0	1.11595	0	0	0	0	0	0	0	1.10695	0	0	0	0.391033	0	0	1.72939	1.00882	0	0	1.43606	1.79245	0	0	0
C05B5.1	C05B5.1	WBGene00007319	0	0	0	0	0	0	0	0	0	0	0	0	0	0	0	0	0	0	0	0	0	0	0	0	0	2.85605	0	1.03784	0	9.32865	0	0	0	3.16392	0.194083	0	0.228094	0	0	0	0	0	0	0	0	0	0
C05B5.11	C05B5.11	WBGene00045242	0	0	0	0	0	0	0	0.517748	0.728104	1.69515	1.23333	0	0	1.57498	2.93821	3.12242	1.46196	0	0	7.60961	9.69421	6.88259	3.11183	0	0	0	0	0	0	1.39041	0	0	0.327975	0	0.247903	0.954075	6.78048	2.85958	2.90336	10.3153	0.685921	2.38374	0	0.698306	0	3.03728	0
C05B5.12	C05B5.12	WBGene00194886	0	0	0	0	0	0	0	0	0	0	0	0	0	0	0	0	0	0	0	0	0	0	0	0	0	0	0	0	0	0	0	0	0	0	0	0	0	0	0	0	0	0	0	0	0	0	0
C05B5.16	C05B5.16	WBGene00219280	0	0	0	0	0	0	0	0	0	0	0	0	0	0	0	0	0	0	0	0	0	0	0	0	0	0	0	0	0	0	0	0	0	0	0	0	0	0	0	0	0	0	0	0	0	0	0
C05B5.17	C05B5.17	WBGene00219314	0	0	0	0	0	0	0	0	0	0	0	0	0	0	0	0	0	0	0	0	0	0	0	0	0	0	0	0	0	0	0	0	0	0	0	0	0	2.02884	0	0	0	0	0	0	0	0	0
C05B5.2	C05B5.2	WBGene00007320	0	0	0	0	0	0	0	0	0	0	0	0	0	0	0	0	0	0	0	0	0	0	0	0	0	0	0	0	0	0	0	0	0	0	0	0	0	0	0	0	0	0	0	0	0	0	0
C05B5.3	pqn-8	WBGene00004100	0	0	0	0	0	0	0	0	0	0	0	0	0	0	0	0	0	0	0	0	0	0	0	0	0	0	0	0	0	0	0	0	0	0	0	0	0	0	0	0	0	0	0	0	0	0	0
C05B5.4	C05B5.4	WBGene00007321	0	1.94423	2.06191	0	1.20939	0.702496	0.630346	0.998672	0.618357	1.62731	2.43018	1.2038	2.40444	4.72704	3.12712	1.4923	2.43719	3.61056	2.75735	24.4664	11.4075	8.09204	0	3.04202	0	64.132	2.07727	9.13041	18.5552	113.528	0	6.06931	11.1467	12.6571	7.35459	3.85481	21.6859	66.8645	7.05703	14.3454	4.52593	2.53166	4.36257	2.00963	8.19806	37.7474	65.0857
C05B5.5	C05B5.5	WBGene00007322	0	0	0	0	0	0	0	0	0	0	0	0	0	0	0	0	0	0	0	0	0	0	0	0	0	0	0	0	0	0	0	0	0	0	0	0	0	0	0	0	0	0	0	0	0	0	0
C05B5.6	fbxa-155	WBGene00007323	0	0	0	0	0	0	0	0	0	0	0	0	0	0	0	0	0	0	0	0	0	0	0	0	0	0	0	0	0	0	0	0	0	0	0	0	0	0	0	0	0	0	0	0	0	0	0
C05B5.7	rgs-1	WBGene00004344	0	0	0	0	0	0	0	0	0.421019	0	0	0.485098	0.460292	0	0	0	0.974551	0	0	0	0	1.62032	0.28603	0	0	0	0	0	0	0	0	0	0	0.448663	0	0	0	0	0	0	0	0	0.337356	0	0	0	0
C05B5.8	C05B5.8	WBGene00007324	0.997811	0	2.06191	0	0	2.50818	0	0.495298	0.399934	0	0	0	0	0	0	0	0.487201	2.60599	0	0	0	0	0	0	0	0	0	0	0	0	0	0	0	0	0	0	0	0	0	0	0	0	0	0	0	0	0
C05C10.1	pho-10	WBGene00007328	0	0	0	0	0	0	0	0.661542	0	0	0.291027	0	0	2.54528	2.04948	2.98533	0.974521	2.67345	1.63757	4.21244	2.36801	0	0	0	3.37094	5.87966	13.1548	10.1955	10.4544	21.5822	5.31349	3.26177	3.34592	1.89424	4.16427	4.61218	5.20557	3.60779	1.16704	1.30607	1.39437	2.96525	0	0.94289	0	2.07602	0
C05C10.2	C05C10.2	WBGene00007329	41.2614	38.1398	53.8168	65.5088	56.0949	73.305	72.7936	41.1471	55.7577	58.1084	45.1841	43.1482	25.8145	67.1541	59.1989	61.6298	56.0476	57.051	62.4389	82.2639	70.5092	58.832	57.9322	25.9606	74.9659	122.661	127.153	133.53	148.313	113.499	77.8408	86.8985	106.425	99.4864	108.463	90.8936	112.952	144.678	73.319	70.5619	95.669	102.28	62.2016	46.1208	34.5869	49.8896	57.9185
C05C10.3	C05C10.3	WBGene00007330	86.0983	105.066	96.9288	76.522	98.8355	88.6899	71.5035	67.41	72.0164	80.5111	64.6182	77.5295	82.1519	56.5457	49.554	58.7638	37.7956	50.8346	51.532	49.3909	41.2173	44.834	57.0564	90.9987	42.961	15.2186	7.87914	12.8947	13.9392	17.4884	13.1901	15.1238	14.639	16.7375	11.5588	13.4097	22.3813	11.7798	14.4032	21.575	18.3765	21.6315	50.4629	57.7413	0	9.75107	5.07054
C05C10.4	pho-11	WBGene00007331	0	0	0	0	0	0	0	0	0	0	0	0	0	0	0	0	0	0.607051	0.383242	0.864842	0	0	0	0	0	0.764779	0	0	0	0	0	0	0.329675	0.780065	0	0.476979	0	0.405571	0	0	0	0.791748	1.87254	0	6.1901	0	0
C05C10.5	C05C10.5	WBGene00007332	1065.9	1144.15	964.187	1263.38	1315.95	1089.65	937.22	1059.96	1074.78	931.999	712.834	804.664	873.172	103.995	119.072	106.656	71.3408	132.207	122.619	73.1528	31.3749	56.8766	502.19	722.182	35.2349	37.4252	31.0196	22.2051	50.4021	28.8577	39.3083	29.9612	32.5405	35.2228	36.7861	21.7787	26.654	20.223	25.3792	32.1557	38.9498	40.5998	496.225	670.356	11.9971	17.7458	12.232
C05C10.6	ufd-3	WBGene00007333	214.499	235.489	273.182	403.515	273.372	351.236	255.334	196.386	198.691	141.336	144.916	319.084	194.026	48.1369	49.0618	39.4452	47.3911	40.3706	45.2809	21.4084	13.7877	19.5712	139.932	229.907	7.49588	12.1729	19.1268	12.2766	9.82426	7.36508	13.829	15.6154	10.0767	18.6887	16.3722	12.6568	20.9541	9.51763	16.3914	36.7342	12.6625	13.1663	124.376	84.7685	20.1952	13.9036	16.6983
C05C10.7	C05C10.7	WBGene00007334	4.06816	0	5.55977	4.468	6.56878	2.74229	0.630346	3.48829	5.10783	2.387	6.42328	5.12993	3.90422	8.42568	4.06454	5.26538	7.54191	6.14907	2.78782	3.37136	8.65451	5.32489	6.77638	3.11906	0	2.96205	3.81269	2.14126	2.06279	1.34295	1.47037	0	3.43034	2.69954	2.36849	3.14633	4.06121	3.69511	0.562342	1.63971	2.38107	1.71203	3.34797	4.17912	0	0	0
C05C10.8	C05C10.8	WBGene00086567	0	0	0	0	0	0	0	0.10173	0.245476	0.627422	0	0	0	0	1.60117	0	0	0	0.235491	0	1.04583	0	0	0	0	0.419519	0.643177	1.02754	1.75289	0	0	0	0.782066	0.737203	0.194083	0	0	0.405571	0.68814	0	0.627574	0	0	0	0	0	0
C05C12.1	C05C12.1	WBGene00007335	0	0	0	0	0	0	0	0	0.182698	1.35479	0	0	0	0	0	2.03392	0	0	0.245617	0	0	0	0.622063	0	0	0	0.798415	1.03784	0	0	0	0.610073	1.7713	1.55875	0.68995	0.921507	2.76567	1.7432	0.568984	3.63961	0	0	0	0.34911	0	0	0
C05C12.3	gtl-1	WBGene00001795	0	0	0	0	0	0	0	0.249995	0.123597	0	0.289588	0	0.262177	0	0	0.595905	0	1.03725	0.471039	0	2.09192	0.783866	0	0	0	0	2.65489	0	0	0	0	0	1.22945	0.561394	3.36429	0	0	0	0.568984	9.38899	0	0	0	0	0	0	0
C05C12.4	C05C12.4	WBGene00007336	0	0	0	0	0	0	0	0	0	0	0	0	0	0	0.341031	0	0	0	0	0	0	0	0	0	0	0	0	0	0	0	5.32648	0	0	0	0	0	0	0	0	0	0	0	0	0	0	0	0
C05C12.5	C05C12.5	WBGene00007337	0	0	0	0	0	0	0	0	0	0	0	0	0	0	0	0	0	0	0	0	0	0	0.470541	0	0	0	6.46368	0	0	1.39041	0	1.10695	1.20623	0	3.17317	0	0	0	0	0	0	0	0	0	0	0	0
C05C12.6	C05C12.6	WBGene00007338	0	0	0	0	0	0	0	0.535781	0	0.311639	0	0	2.01812	0.787395	3.59765	0	0	0	0.2565	0	0	0.783866	0	0.557906	0	0	0	0	3.5062	0	0	0	0.448697	0	0	0.593272	0	0	1.12482	0	0	0.862175	0.626765	0.694262	0	0	0
C05C8.1	C05C8.1	WBGene00015460	17.998	19.1575	9.32171	19.1056	22.2514	14.4215	9.53788	18.4112	15.4393	15.3819	13.7995	14.6268	14.4213	7.89127	9.53484	12.0189	6.45983	6.66196	9.63592	7.41252	4.06432	5.84065	9.95505	10.0678	9.34608	7.09507	5.16839	5.78842	9.34409	3.87406	6.63615	4.39504	3.98422	3.54277	5.09484	6.10483	5.62954	8.24623	6.26156	4.09953	4.05148	5.02694	11.4912	16.4622	12.3817	9.26687	31.315
C05C8.2	C05C8.2	WBGene00015461	46.1533	55.4644	56.4058	69.146	49.7875	75.1801	89.2204	79.4423	98.0688	110.023	114.541	104.041	95.9476	75.5818	75.2066	77.0706	78.1282	74.7197	81.9315	96.4992	96.4635	89.0965	123.298	76.3689	105.923	109.496	103.713	127.543	108.91	94.6271	85.659	102.058	107.167	106.674	100.72	103.375	138.865	120.06	112.106	169.833	184.865	180.312	147.106	55.5071	119.236	115.913	121.98
C05C8.3	fkb-3	WBGene00001428	0	0	0	0.263717	0	0.234108	0	1.70248	1.80563	1.32848	4.19607	0.881358	0.840256	3.45985	1.2695	2.28005	0.632987	1.74368	0	2.16633	0	3.48856	3.93416	0	0	0	0.543223	0	3.5062	0.76722	1.8028	2.56951	0.22485	1.6034	1.47113	0.782161	0.714531	4.84153	0	2.34387	0.300779	0.785596	2.5272	0.593779	0	2.07602	3.08471
C05C8.4	gei-6	WBGene00001563	26.4786	35.0856	44.8671	60.2651	47.5826	48.6206	34.4193	119.473	108.866	124.57	93.2555	83.8571	49.8802	124.658	133.282	152.163	136.253	132.965	131.822	134.252	55.7163	85.7431	109.656	57.1245	59.5151	88.6497	73.4486	79.512	91.4208	99.5236	65.2027	87.0422	78.5916	85.3344	70.7523	90.4756	87.0675	62.2422	49.5286	37.7285	75.5546	74.1232	75.7702	61.2428	97.8751	59.8677	61.0898
C05C8.5	C05C8.5	WBGene00015462	20.6156	2.63152	12.6848	23.9069	11.2176	14.8849	16.945	30.3853	28.8103	22.5918	28.4829	26.3057	18.8242	39.9072	37.9788	32.174	43.6146	28.3638	34.0817	36.9813	13.9072	25.825	31.5449	11.397	30.8774	40.2046	35.8826	34.2847	27.5093	42.0466	45.5791	46.7531	36.109	38.1869	24.3606	26.1474	32.6541	24.0415	28.4356	9.17349	27.8258	26.5506	26.6328	22.7374	44.583	21.6316	13.8126
C05C8.6	hpo-9	WBGene00015463	30.0408	22.9289	43.068	16.5038	7.77876	42.4087	133.914	5.89427	8.16771	9.63473	14.5769	103.666	213.664	14.168	4.40691	9.58577	11.3714	9.93942	9.6002	9.96922	24.2994	19.1252	22.0412	115.365	19.7889	42.2882	29.9401	37.1063	43.1993	30.4437	26.3774	27.5859	27.9729	24.7064	28.0376	49.0901	35.3812	38.4729	30.5761	54.6155	21.1843	30.4189	99.3789	100.006	53.8188	78.6567	82.3809
C05C8.7	C05C8.7	WBGene00015464	0	2.3937	0	0	0	0	0.315135	0.380215	1.1196	0.338864	0.60558	0.376627	0	0	0	0	0	0	1.15001	0	0	0	0	0	0	0	0	0.894763	0	0	0	0	0	0	0	0.528259	0	0	0	0.504349	0	0	0	1.1877	0	0	0
C05C8.8	C05C8.8	WBGene00015465	0	0	0	0	0	0	0	0.16076	0	0	0.291027	0	0	0	0	0	0	0	0	0	0	0	0	0	0	0	0	0	0	0	0	0	0	0	0	0	0	0	0	0	0	0	0	0	0	0	0
C05C8.9	hyls-1	WBGene00015466	18.3224	18.5203	7.36142	32.2056	31.9001	20.1394	10.4849	49.7738	50.8589	30.2748	31.8611	22.6268	24.8238	35.6925	34.3867	31.1673	44.8067	30.5142	26.506	15.5156	16.0112	14.2135	15.6768	12.764	35.6622	39.2885	25.6586	28.977	22.3178	23.4048	28.4319	14.8365	27.8357	27.3028	22.9891	37.5219	20.5416	26.621	21.0483	14.8746	19.5343	11.3811	14.0756	14.0406	23.9972	72.4114	42.4606
C05C9.1	C05C9.1	WBGene00007325	0	0	0	0	0	0	0	0	0	0	0	0	0	0	0	0	0	0	0	0	0	0	0	0	0	0	0	0	0	0	0	0	0	0	0	0	0	0	0	0	0	0	0	0	0	0	0
C05C9.2	C05C9.2	WBGene00007326	0	0	0	0	0	0	0	0	0	0	0	0	0	0	0	0	0	0	0	0	0	0.783866	0	0	0	0	0	0	0	0	0	0	0	0	0	0	0	0	4.71632	4.02058	0	0	0	0	0	0	0
C05C9.3	C05C9.3	WBGene00007327	0	0	0	0	0	0	0	0	0	0	0	0	0	0.91434	0	0	0	0	0	0	1.18386	0	0	0	0	0	0	0	0	0	0	0	0	0	0.495675	0	0	0	6.95861	6.15464	0	0	0	0	0	0	0
C05D10.1	attf-4	WBGene00015477	12.9906	18.1905	16.1848	15.5379	7.93286	28.3004	12.8067	26.331	21.0023	24.4282	21.8623	20.6981	22.1066	27.0174	29.8587	33.5694	27.1642	34.3699	26.8917	44.9688	31.0988	33.3874	30.2238	22.9806	31.2101	33.5126	71.9814	27.9597	27.7085	25.1261	65.5259	34.5964	46.0796	28.285	98.0834	45.7275	45.3259	44.1519	27.498	21.2777	20.8951	11.4694	22.0336	12.6646	48.5974	48.8327	41.7528
C05D10.2	C05D10.2	WBGene00015478	0	0	0	0	0	0	0	0	0.249654	0	0	0	0.904383	0	0	1.34197	0	0.285077	0.701942	0	0	0	0	0	0	1.91744	0	0	0	0	0	0	0	0	0	0	0	0	0.562342	0	0	0	0.761264	0.721584	0	0	0
C05D10.3	wht-1	WBGene00015479	0.997811	6.73223	10.8597	2.62062	11.3735	5.56549	17.9294	0.790215	0.691818	0	0.257424	1.13219	0	0	0	3.02611	0	1.18869	0.756958	1.17145	10.2561	9.50688	0	0	0	2.57637	2.9126	1.9223	1.75289	1.39041	5.8744	0.72956	2.55361	0.466789	3.53683	3.15537	1.60527	2.27989	104.398	72.5083	0	0.785596	0	6.23288	0	2.07602	3.66778
C05D10.4	C05D10.4	WBGene00015480	3.43383	2.77686	0	0.527499	0	6.03376	5.77147	3.23434	1.83533	1.43763	1.58001	1.27771	1.22031	0.91434	2.58103	3.52623	2.00598	1.45817	3.75032	2.18025	1.18386	0	0	1.41141	3.37094	2.02364	5.99276	1.02754	8.81842	3.95995	1.47037	0	0.781589	0.380654	2.27529	0.460697	7.85858	5.17075	0.568984	0	0	0.607733	0	1.41585	19.8135	17.2698	9.10617
C05D11.1	C05D11.1	WBGene00015481	55.0421	38.5204	36.0532	92.0669	68.4783	63.6766	41.4597	97.2722	96.2637	84.5838	86.1228	78.2267	65.3743	101.76	99.9694	81.9605	103.409	95.635	80.8514	109.974	127.9	102.29	105.372	46.2141	89.5879	51.7952	55.5235	45.8762	25.9539	59.3862	57.0923	50.6929	65.7016	84.962	89.2708	56.4912	84.876	57.6081	45.0986	78.8218	85.9304	69.5987	54.3854	51.3004	38.7746	28.7866	29.4064
C05D11.10	mrps-17	WBGene00015487	7.98932	14.0102	8.80545	9.60997	2.41908	12.9273	4.73512	17.2008	20.7125	21.9033	21.119	25.2165	17.4074	20.5227	16.0439	20.9429	13.2044	14.0032	15.17	15.9792	27.4223	32.3552	19.2781	17.0068	19.5709	16.4823	20.7281	22.638	16.6298	28.1595	24.3468	17.8114	18.3562	19.0251	13.8577	28.0622	24.8891	33.3658	19.789	17.4291	14.4645	19.9169	22.7722	15.4925	46.5885	15.7234	23.7361
C05D11.11	mel-32	WBGene00003214	256.06	206.14	215.652	378.726	304.243	359.467	302.025	528.267	516.602	502.25	558.14	514.72	418.061	589.597	530.181	567.82	611.983	568.584	601.15	595.857	691.756	602.704	607.186	313.899	453.289	539.019	571.505	587.458	505.537	465.309	529.877	515.539	530.617	534.282	540.663	515.128	564.572	497.403	510.264	285.962	487.548	475.259	458.921	366.242	121.63	124.871	87.291
C05D11.12	let-721	WBGene00002855	103.381	141.802	170.455	169.433	102.989	129.879	123.536	211.394	201.157	196.018	211.557	165.278	164.3	177.532	208.83	202.571	176.138	227.76	185.717	126.273	71.3908	96.5542	184.71	129.897	30.9912	38.501	54.7123	28.6408	43.0716	54.8545	81.9933	55.0989	55.6714	62.5598	68.4252	49.767	79.1229	38.226	48.4596	23.2387	105.929	82.3654	142.411	124.318	5.80703	26.7481	14.1038
C05D11.13	C05D11.13	WBGene00015488	3.43383	2.24864	9.30637	2.88434	2.0746	0.468274	4.45284	2.99501	3.44452	1.57659	5.12249	3.8885	3.57427	1.94127	1.61767	0.792007	4.443	1.23253	1.51985	2.5528	0	3.18824	1.89423	11.5865	0	2.3998	2.23638	5.72162	1.35263	3.62465	0	2.75028	0.321055	6.1945	1.75849	1.46551	2.43352	1.8021	3.19625	7.23538	8.64039	6.75182	4.1012	9.76943	0	16.4202	11.3765
C05D11.2	vps-16	WBGene00006516	24.015	15.2119	35.5554	17.3419	15.3694	42.0349	38.3909	21.552	17.0841	14.802	18.937	11.3758	17.3904	9.57898	22.9337	10.7284	14.8807	12.9886	12.3483	16.8827	13.8968	15.5366	18.4951	26.958	15.3234	12.1318	6.02058	6.15031	9.10176	9.42732	8.5042	5.41891	10.7492	9.59088	5.4347	10.1936	14.2712	8.31465	10.4161	3.43221	10.5678	11.0706	18.1178	16.3915	6.1901	2.07602	6.75283
C05D11.3	tag-170	WBGene00006515	228.77	193.565	271.654	252.809	213.149	234.288	205.035	218.776	227.36	247.073	228.872	244.065	178.209	246.828	257.022	218.34	236.251	216.278	244.478	239.848	252.032	257.493	258.837	171.15	196.349	183.583	186.399	159.695	206.932	180.771	178.704	212.487	229.076	218.083	208.519	181.911	176.934	159.949	119.12	115.764	152.335	154.731	199.322	155.382	153.776	156.139	131.341
C05D11.4	let-756	WBGene00002881	0	0	0	0.263717	0	3.05731	0	0.370979	0.864757	0.311639	2.25869	1.23844	1.29107	3.6587	1.21574	1.68414	1.4902	0.202301	0.295398	0.502594	0	0.907762	0	0	0	0	0	0	0	0	0	1.83995	0	0	0.495675	0	0.228094	0	2.33437	0	0.902559	0.132087	1.34992	0	0	0	0
C05D11.5	C05D11.5	WBGene00015483	0	0	3.63351	0.263717	0	0	0.315135	0	0.332	0	0.839549	0.772887	0.524419	0.787395	0	0.792007	0	0	0.33084	0	0	0	1.16	0	2.93478	0	0.643177	1.02754	0	0	0.90129	0	0	0	0.492828	0	0.581258	0	0	0.801719	0	0.319305	0.626765	2.41417	0	0	1.39494
C05D11.6	nas-4	WBGene00003523	0	0	0	0	0	0	0	0.742712	0.650699	0	2.00465	0.485098	0	1.81406	3.41816	0.792007	0.515653	0.209321	0.671735	3.32789	0	5.54156	2.22944	3.04202	0	0.764779	0.798415	0	0	0	1.28505	0	0.329675	1.13661	0.689758	0.819649	0.357222	1.87412	0	2.18061	2.13527	2.75264	0.761264	0	0	0	0
C05D11.7	C05D11.7	WBGene00015484	55.0421	46.9758	80.0035	70.6686	48.5884	54.5304	66.7288	87.5233	84.1237	80.6807	107.482	78.8881	53.3935	182.541	162.634	153.616	156.893	177.3	171.663	160.474	156.266	178.292	103.735	67.7606	237.947	167.292	169.513	128.305	137.181	187.957	193.069	161.417	193.53	163.416	211.945	181.323	102.797	83.1609	152.702	213.087	82.4419	109.385	96.6694	78.1573	42.4058	65.4673	46.5241
C05D11.8	C05D11.8	WBGene00015485	0	1.26952	3.6254	0	0	0	0	1.22272	0.489229	0	0.908481	0	0.72247	0.970518	0	2.13397	0.487201	0.887943	1.60952	4.45864	1.04583	0.783866	1.36279	0	0	6.23326	1.2392	3.04633	4.91109	1.34295	1.28505	1.22029	2.29615	2.74006	2.5556	5.32798	2.51989	0.81124	4.12489	2.33317	2.82984	2.19142	2.62171	0.34911	14.0051	0	15.1033
C05D11.9	C05D11.9	WBGene00015486	66.3837	99.3527	107.847	79.736	61.8289	56.8551	56.8234	51.5347	54.748	55.4368	59.5613	28.1763	27.4845	32.448	45.3358	38.358	36.9567	29.038	41.733	52.0704	36.8963	27.7511	31.6199	26.7435	17.2812	42.2003	38.0304	32.134	34.1798	29.5897	30.5183	40.9485	30.7013	40.7406	29.1486	40.5888	34.2566	35.884	31.2857	15.0839	24.5942	20.7777	21.49	16.446	82.8218	30.6456	55.3018
C05D12.1	C05D12.1	WBGene00007339	0	1.12418	0	0	0	0	0	0.143794	0	0	0	0	0	0	0	0.841967	0	0	0	0	0	0	0	0	0	0	0	0	0	0.839022	0	0	0.327975	0	0	0	0	0	0	0	0	0	0	0.721584	0	0	0
C05D12.2	C05D12.2	WBGene00007340	0	0	0	0	0	0	0	0	0	0	0	0	0	0	0	0	0	0	0	0	0	0	0	0	0	0	0	0	0	0	0	0	0	0	0	0.391033	0	0	0	0	0	0	0	0	0	0	0
C05D12.3	C05D12.3	WBGene00014666	0	0	0	0	0	0	0	0	0	0	0	0	0	0	0.533593	0	0	1.00457	0.871855	0	0	0	0	0	0	0	1.05571	0	0	0	0	0	0	1.06073	0	0	0	0	0	0	0.749543	0	0	0	0	0	0
C05D12.4	C05D12.4	WBGene00007341	0	0	0	0	0	0	0	19.3541	21.2827	37.2938	51.32	0	0	94.5397	158.788	149.449	103.103	120.019	156.484	46.2206	29.0093	37.0869	4.6184	9.68619	151.754	111.577	121.927	69.4611	109.383	154.386	88.443	85.7125	125.256	129.813	138.504	142.913	43.4231	33.842	44.075	62.7856	8.76052	5.18451	2.14948	11.9085	0	16.9991	1.39494
C05D12.5	C05D12.5	WBGene00007342	0.997811	0	0	0	0	5.56549	0	8.70341	5.77845	11.3318	16.6096	2.10251	0.262177	31.652	29.6995	47.7141	21.9153	31.7174	24.1446	18.3941	3.01848	18.1544	14.6005	0	59.5169	66.3852	19.8571	3.85512	49.1675	48.2582	24.0642	19.0705	37.9925	33.8894	14.7995	16.0162	39.6346	26.9067	2.29837	2.34387	42.4091	31.0007	6.27163	0	0	6.71305	0
C05D12.7	C05D12.7	WBGene00044029	0	0	0	0	0	0	0	0	0	0	0	0	0	0	0	0	0	0	0	0	0	0	0	0	0	0	0	0	0	0	0	0	0	0	0	0	0	0	0	0	0	0	0	0	0	0	0
C05D2.1	daf-4	WBGene00000900	6.10298	9.60306	9.3136	14.6117	11.9305	18.649	12.7503	26.6325	24.9937	20.978	10.0426	21.9556	34.5098	0.91434	3.356	1.53807	3.41157	3.49188	2.90486	0.492291	0	0	12.8512	18.533	0	5.34451	2.9126	2.82759	1.35263	0	6.31366	5.31371	6.05319	0.939638	2.86187	0.74792	0.874224	0	0	0.504349	0	6.46294	13.6973	19.8173	28.3953	5.1133	7.27158
C05D2.10	C05D2.10	WBGene00015470	78.5702	90.2393	97.4746	161.506	93.4906	130.398	117.074	180.029	183.938	159.915	181.023	131.931	117.375	156.006	153.295	164.205	161.2	153.018	166.485	141.107	109.514	123.946	182.935	124.44	98.7843	76.9712	74.2274	80.792	98.7833	117.909	127.733	93.4645	94.0649	82.5683	89.4541	92.6523	90.7852	68.3383	82.4439	101.547	90.0671	104.323	159.502	99.7835	38.0051	63.125	49.811
C05D2.3	C05D2.3	WBGene00015467	0	0	0	0	0	0	0	0	0	0	0	0	0	0	0	0	0	0	0	0	0	0	0	0	0	0	0	0	0	0	0	0	0	0	0	0	0	0	0	0	0	0	0	0	0	0	0
C05D2.4	bas-1	WBGene00000239	0	0	0	0	0	0	0	0	0	0	0	0	0	0	0	1.78815	0	0	0.235491	0	2.22969	0	0	0	0	0	0	0	0	0	0	0	0.279629	0.941422	0	0	0	0	0	0	0	0.945	0	1.39695	0	0	0
C05D2.5	xnd-1	WBGene00001514	116.728	123.439	77.6125	105.849	118.488	127.705	130.896	45.1368	47.8943	51.257	38.9998	80.4616	133.236	7.27253	8.90409	6.745	11.8876	10.4448	7.76628	3.36118	9.96649	8.67015	18.1388	154.209	12.2816	4.75567	8.94377	1.9223	6.97389	0.76722	0	6.74228	4.75903	1.17191	2.77817	5.40076	7.14813	3.92247	5.27893	6.16476	6.00376	7.25272	48.4314	132.62	6.1901	3.03728	0
C05D2.6	madf-11	WBGene00015468	82.6405	53.8541	39.542	79.0121	37.3807	39.512	42.1114	80.6457	73.956	46.8	42.9162	50.3628	37.4838	20.1366	27.2756	26.7606	18.6405	24.3119	20.8983	12.7004	9.43436	6.65259	31.6932	48.3696	15.7597	11.3996	17.4572	15.5144	10.7639	7.3756	15.8855	12.9775	9.9798	6.6652	12.3255	9.20637	11.7464	21.1663	16.0211	18.6215	9.00862	22.787	39.5362	62.701	22.2052	23.8797	20.0585
C05D2.8	C05D2.8	WBGene00015469	22.3995	21.1692	16.5362	5.14133	3.28399	10.8178	15.7423	1.07531	1.83209	1.66643	2.19597	2.13956	1.90669	0.843547	0.928387	0	2.43654	0.334459	0.766578	0	0.9172	2.40419	1.65683	0.853508	5.97514	0.764779	0.543223	0	0	0	0.90129	0	0.64903	1.16816	2.90393	1.18669	0.604075	2.3334	0.562342	0	0	0.313154	0	7.10602	0	0	0
C05D9.1	snx-1	WBGene00004927	48.1719	42.3493	52.9338	62.3884	43.6318	63.8492	49.3451	38.5524	41.2698	43.0224	48.4583	59.211	44.8941	13.7349	21.6258	25.5054	29.2801	26.7098	20.7104	25.6659	13.2439	11.4561	53.6004	54.8765	19.3471	26.8721	19.84	33.9513	28.0708	23.0928	26.7604	22.4235	32.6656	24.592	25.8303	26.3259	27.8513	33.367	32.6901	53.9656	22.4592	24.4931	54.3388	47.9734	32.5799	24.994	29.7467
C05D9.2	lmp-2	WBGene00015471	0	0	0	0	0	0	0	0.12722	0	0	0	0	0	0	0	0	0	0	0	0	0	0	0.28603	0	0	0	0	0	0	0	1.5593	0	0	0	0	0	0	0	0	0	0	0.472442	0	0	0	0	0
C05D9.3	C05D9.3	WBGene00015472	0	0	0	0	0	0	0	0	0	0	0	0	0	0.970518	0.587355	0	1.75333	0.285077	0.235491	1.0191	0	0.783866	0	0	0	0	0.798415	2.14126	0	0	0	0	0.833151	0	0	0	0.300071	0	0	0	0	0	0	0	0	0	0
C05D9.4	C05D9.4	WBGene00015473	0	0	0	0	0	0	0	0	0	0	0	0.39626	0	0	0	0	0	0	0	0	0	0	0	0	0	0	0	0	0	0	0	0	0	0	0	0	0	0	0	0	0	0	0	0	0	0	0
C05D9.5	ife-4	WBGene00002062	10.1741	7.55247	5.55211	5.14133	2.0746	0	5.14113	5.08708	7.04965	2.76	2.15925	2.39037	2.53184	3.77018	2.42598	2.28431	2.92437	1.54342	2.6394	6.27001	1.83462	2.80986	0.408688	0.853508	0	6.32992	4.20081	6.04425	0	0	2.70453	2.48568	3.62858	2.75629	4.65845	2.46936	2.59901	6.97624	3.75873	6.64183	0.685921	8.98067	4.93181	3.56679	14.0051	13.4277	13.0804
C05D9.7	C05D9.7	WBGene00015474	12.9906	14.5376	10.8759	7.25288	23.9614	9.47979	14.048	8.77588	6.60995	13.1354	13.333	16.9573	5.6602	19.2778	12.2738	6.40331	11.8219	3.89971	4.9704	5.11565	13.0091	14.1129	17.3434	3.20783	4.89093	33.6278	3.76584	8.32055	0	7.60106	38.9632	24.0214	7.26	7.13761	5.71494	6.16705	6.63011	32.5563	34.6322	39.7355	38.3047	29.6762	12.7097	4.18397	46.2052	79.7084	90.7664
C05D9.9	C05D9.9	WBGene00015476	0	0	0	0	0	0	0	0	0	0	0	0	0	0	0	0	0.487201	0	0	0	0	0	0	0	0	0	0	1.02754	0	0	0	0	0	0	0	0	0	0	0	0.801719	0	0	0	0	0	0	0
C05E11.1	lnp-1	WBGene00015492	12.2104	4.57576	7.12371	5.52506	6.91393	12.2208	5.05141	17.566	22.5385	23.5573	17.2109	13.7759	7.94573	27.2399	18.917	24.3803	17.9783	23.8511	26.2979	26.9336	31.4949	26.5837	24.4635	5.91063	29.0275	36.7551	40.3142	42.1028	32.173	19.2399	22.7171	38.0633	39.405	30.331	34.049	34.3982	28.7497	38.7801	35.2095	41.0882	30.4445	41.6896	28.3815	13.9787	94.7458	88.6227	51.4112
C05E11.2	C05E11.2	WBGene00015493	0	0	0	0	0	0	0	0	0	0	0.302753	0	0	0	0	0	0	0	0	0	0	0	0	0	0	0	0	0	0	0	0	0	0	0	0	0	0	0	0	0	0	0	0	0	0	0	0
C05E11.3	C05E11.3	WBGene00015494	17.998	12.8167	3.87844	9.24593	11.0646	12.3035	7.03309	6.22051	5.94804	2.60823	6.0945	5.6456	4.93011	5.47277	8.23755	4.51048	9.79107	3.53685	4.34067	4.79975	2.36801	4.20112	4.06283	5.47393	1.51999	4.60033	0.596023	1.03784	1.75289	2.37365	1.5593	0	1.53335	1.7699	0.883094	3.01493	2.39975	1.39643	0	2.47786	1.05032	2.34593	3.16179	0.698306	8.19806	3.03728	3.68093
C05E11.4	amt-1	WBGene00000133	0	0	0	0	0	0	0	0	0	0	0	0	0	0	0	0	0	0	0	0	0	0	0.408688	0	0	0	0	0	0	0	0	0	0	0	0	0	0	0	0	0	0.685921	1.27083	0.626765	0	0	0	0
C05E11.5	amt-4	WBGene00000136	0	0	0	0	0	0	0	0	0	0	0.289588	0	0	0	0	0	0	0	0	0	0	0	0	0	0	0	0	0	0	0	0	0	0	0	0	0	0	0	0	0	0	0	0	0	0	0	0
C05E11.6	C05E11.6	WBGene00015495	0	0	0	0	0	0	0	0	0	0	0	0	0	0	0	0	0	0.570224	0	0	0	0	0	0	0	0	0.639352	0	0	0.76722	0	0	0	0	0	0	0	0	0	0.819757	0	0	0	0	0	0	0
C05E11.7	C05E11.7	WBGene00015496	0	3.06842	7.2598	2.52071	0	3.05731	0	0	0.493875	0.623355	2.10722	0	0	0	0	0	0	3.40866	0	0	0	0	0	0	5.87029	2.54253	2.49347	3.342	2.06279	3.07001	0	0	1.24905	0.927177	0.535286	0.460697	0	0	1.72939	0	0.300779	0.319305	0	2.38797	0	0	1.68977
C05E11.8	flp-12	WBGene00001455	0	0	0	0	0	0	0	0	0	0	0	0	0	0	0	0	0	0	0	0	0	0	0	0	0	0	0	0	0	0	0	0	0	0	0	0	0	0	0	0	0.811831	0.264206	0	0.34911	0	0	1.39494
C05E4.1	srp-2	WBGene00005643	0.997811	2.3937	0	0	0	0.234108	0.315135	0.945173	1.66823	2.00529	2.17813	0.359305	0.642142	2.60146	1.74644	3.47229	5.57076	4.81381	10.4797	4.80199	2.22969	2.80986	2.1489	0	19.999	31.103	16.8503	11.1484	33.2522	28.2504	23.033	15.628	19.0255	11.7036	15.1314	16.1122	17.0205	25.286	16.1933	28.665	20.9937	24.6147	2.83666	3.21734	14.0051	36.2863	15.3696
C05E4.10	srj-25	WBGene00005613	0	0	0	0	0	0	0	0	0	0	0.364358	0	0	0	0	0	0	0.202301	0	0	0.9172	0.783866	0	0	0	0	0	0	0	1.39041	0	0	0	0	0	0.443315	0.228094	0	0	0	0	0	0	0	0	0	0
C05E4.11	srj-24	WBGene00005612	0	0	0	0	0	0	0	0.0831624	0	0	0	0	0	0.787395	0	0	0	0	0	0	0	0	0	0	0	0	0	0	0	0	0	0	0	0	0.726952	0	0	0	0	0	0	0	0	0	0	0	0
C05E4.12	C05E4.12	WBGene00015491	0	0	0	0	0	0	0	0	0	0	0	0	0	0	0	0	0	0	0	0	0	0	0	0	0	0	0	0	0	0	0	0	0	0	0	0	0	0	0	0	0	0	0	0	0	0	0
C05E4.13	str-262	WBGene00006288	0	0	0	0	0	0	0	0.469875	0	0	0	0	0	1.94127	0	0	0.632987	0	0.954951	0	0.9172	0	1.41197	0	0	0.90198	1.43777	0	0	0	0	0	1.90004	0	4.05405	1.654	0.714531	0.405571	0	0	1.11261	0.812356	1.56292	0	0	0	0
C05E4.14	srh-2	WBGene00005228	0	0	0	0	0	0	0	0	0	0.623355	0	0	0	0	0	0	0.487201	0	2.68466	0.492291	0	0	0	0	0	0	0	0	0	0	0	0	0	0	0.347808	0	0	0	3.58485	2.12583	0	1.047	0	0	0	0	0
C05E4.15	C05E4.15	WBGene00206359	0	0	0	0	0	0	0	0	0	0	0	0	0	0	0	0	0	0	0.33084	0	0	0	0	0	0	0	0	0	0	0	0	0	0.223847	0	0	0	0.228094	0	0	0	1.37201	0	0	0	0	0	0
C05E4.2	str-20	WBGene00006087	0	0	0	0	0	0	0	0	0	0	0	0	0	0	0	0	0	0	0	0	0	0	0	0	0	0	0	0	0	0	0	0	0	0	0	0	0	0	0	0	0	0	0	0	0	0	0
C05E4.3	srp-1	WBGene00005642	0	0	0	0	0	0	0	0	0	0	0	0	0	0	0	0	0	0	0	0	0	0	0	0	0	0	0	0	0	0	0	0	0	0	0	0	0	0	0	0	0	0	0	0	0	0	0
C05E4.4	sri-4	WBGene00005516	0	0	0	0	0	0	0	0	0	0	0	0	0	0	0	0	0	0	0	0	0	0	0	0	0	0	0	0	0	0	0	0	0	0	0	0	0	0	0	0	0	0	0	0	0	0	0
C05E4.6	str-134	WBGene00006182	0	0	0	0	0	0	0	0	0	0	0	0	0	0	0	1.19196	0	0	1.1393	0	0	0	0	0	0	0	0	0	0	0	0	1.10695	0	0	0	0	0	0	0	0.819757	0	0.574563	0	0	0	0	0
C05E4.7	C05E4.7	WBGene00015489	0	0	0	0	0	0	0	0	0	0	0	0	0	0	0	0	0	0.209321	0	0	0	0	0	0	0	0	0	0	1.75289	0	0	0	0	0	0	0	0	0	0	0	0	0	0	0	0	0	0
C05E4.9	icl-1	WBGene00001564	0	0	0	0	0	0	0	0.168193	0	0.627422	1.27284	0.376627	0	2.47469	0.341031	1.43787	4.09942	0	1.27002	2.54129	35.1827	27.7271	0.496827	0.557906	3.37094	1.0783	1.82575	2.00849	0	5.22662	0	0.610073	0.88855	1.52971	1.4936	0.391033	1.93162	3.32425	164.725	142.686	3.15764	1.4667	2.99898	11.6815	5.80703	14.4387	15.0448
C05E7.1	C05E7.1	WBGene00007343	0	0	0	0	0	0	0	0.136293	0	0	0.289588	0	0	0	0.587355	0	0	0.202301	0	0.864842	0	0	0.941198	0	0	0.90198	9.88062	31.2785	0	1.34295	7.44294	10.9167	0.22485	0.722331	0	0	0.540871	0.526187	0	0	0.300779	0.502	0	0.593779	0	0	0
C05E7.2	C05E7.2	WBGene00007344	0	0	0	0	0	0	0	0	0	0	0	0	0	0	0	0	0	0	0	0	0	0	0	0	0	0	0	2.05532	0	0	1.47037	0	0	0	0.194083	0	0	0	0	0	0	0	0	0	0	0	0
C05E7.3	C05E7.3	WBGene00007345	0	0	0	0	0	0	0	0.434783	0	0.311639	0	0	0	0	0	0.595905	0.487201	0	0.67312	1.36744	1.18386	1.62032	1.19419	0	0	0.419519	1.91852	1.78974	1.75289	1.14071	2.18634	0.511496	0.504479	0	0.90937	0	1.65131	1.06288	0	0.504349	2.30562	4.60871	5.14898	0	0	0	0
C05E7.4	frpr-2	WBGene00007346	0	0	0	0	0	0	0	0	0	0	0	0	0	0	0	0	0	0	0	0	0	0	0	0	0	0	0	0	0	0	0	0	0	0	0	0	0	0	0	4.42388	0	0	0	0	0	0	0
C05G5.1	C05G5.1	WBGene00007347	0	0	0	0	0	0	0	0.228951	1.44727	2.91736	0.580615	0.376627	0	0	1.21284	1.38791	0	0.519689	0.766578	4.38537	0.9172	0	0.408688	0	0	1.49782	1.28253	1.02754	2.06279	0	3.11898	2.85963	1.36277	6.3299	1.32508	3.42204	2.50498	2.02884	0	2.10798	0.928353	1.18195	0	0.34911	0	0	0
C05G5.2	C05G5.2	WBGene00007348	4.06816	9.84073	3.4902	7.67407	16.9241	23.4489	19.4738	21.5698	24.1685	18.5822	17.0404	21.0973	20.8793	22.8426	19.7576	23.594	21.8974	14.8822	20.1713	21.4734	4.98196	8.45051	18.7848	13.0679	10.8668	15.1233	14.7372	14.302	16.594	11.7546	11.9137	15.099	20.5579	13.6492	10.6059	19.0099	12.3195	20.3889	27.9347	19.3869	8.64262	19.5307	15.601	18.9732	29.8071	19.8218	29.0632
C05G5.3	C05G5.3	WBGene00007349	0.997811	1.12418	3.74324	4.9964	1.20939	6.7366	0.315135	5.92321	7.37362	10.6915	9.96505	4.00706	2.00704	4.54291	10.3353	8.43457	4.6457	7.0005	7.48786	12.77	9.05901	4.14949	8.45055	0.557906	13.6974	8.00206	12.368	12.3538	1.75289	10.9393	10.8264	15.8687	14.6874	8.94088	8.72914	11.6313	10.7925	9.73449	14.4191	22.1034	10.7068	10.6177	8.40407	8.14217	0	5.7518	10.4344
C05G5.4	sucl-1	WBGene00007350	67.38	72.8395	61.9097	66.4928	70.0988	51.0886	42.7202	63.6097	61.8301	59.3794	65.9274	63.1127	49.5085	74.3278	94.1053	73.497	87.0235	73.5867	102.919	64.1332	42.8166	60.8564	57.6738	59.6358	55.3746	69.736	85.8753	76.7702	72.2526	58.113	76.6503	72.8021	85.3751	80.0698	75.5966	92.3439	75.1978	58.8024	49.5778	48.2673	61.0346	49.3192	36.3644	61.8881	44.1983	84.4221	99.8486
C05G5.5	C05G5.5	WBGene00007351	0	0	0	0	0	0	0	1.91093	2.36306	2.31701	2.54842	0.772887	0	9.07304	9.10684	16.4678	10.7564	2.52353	5.10737	4.24026	4.05547	6.63476	1.20199	0	11.1975	6.59939	4.15537	5.34201	13.7805	7.20812	1.28505	3.69108	2.59672	2.11047	1.84533	1.35447	5.65811	2.02884	1.94543	2.45987	2.64998	2.70543	0	0	76.6287	13.4277	23.7581
C05G5.7	C05G5.7	WBGene00050939	0	0	0	0	0	0	0	0.418188	0.285472	0.311639	0	0	0	0	0.745857	0	2.00595	1.17283	0.2565	0	0	0	0.817476	0	0	2.74506	1.43777	0	1.35263	2.51768	3.08785	2.67959	3.27504	3.73713	0.68995	0.769781	0	0.990855	0.68814	1.63971	0	0	0	0	0	0	0
C05G6.1	nhr-76	WBGene00015497	0	1.26952	0	0.263717	0	0	0.315135	0.52682	0.123789	0.542784	1.31088	1.61526	0.72247	0.970518	1.21284	0	0	0	0	0	3.00912	0	0.496827	5.30715	0	0	0	0	0	0	0	0.72956	1.24061	2.5375	1.01072	0	0	0	1.12482	1.60363	1.45272	6.24882	0	1.04337	0	0	0
C05H8.1	ckk-1	WBGene00000518	0	0	0	0	0	0.234108	0	0.725365	1.01996	3.44699	0	0	0	0	0.874624	2.22988	0.487201	1.15863	0.618733	0.864842	1.04583	0	0.28603	0	0	0.764779	0.543223	1.02754	0	0	0	0	1.27966	0.448663	0.194083	0.904013	0.228094	0	0.562342	0	1.22921	0.948088	0	0	0	0	0
C06A1.1	cdc-48.1	WBGene00007352	574.662	675.919	712.583	333.644	459.697	606.781	761.148	140.117	119.635	151.898	150.146	473.158	766.032	177.498	149.991	195.981	174.173	191.642	188.863	283.136	319.032	273.55	177.774	917.853	317.426	398.429	399.129	326.578	354.372	330.26	327.942	361.015	358.395	433.813	433.995	385.609	332.831	283.018	260.151	338.704	404.211	441.436	446.635	939.567	328.407	257.165	263.067
C06A1.2	C06A1.2	WBGene00007353	0	0	0	0	0	0	0.315135	0.605671	1.62942	1.56664	0.431615	0.39626	0.262177	2.6163	0	1.58803	0.487201	0.972332	1.05763	2.53889	0.9172	0	3.35879	0	0	1.94926	0.639352	0	1.75289	0	2.75543	0.511496	1.96291	1.3181	0	0	1.77099	0.990855	0	0	1.97875	0.472442	0	0	0	0	0
C06A1.3	C06A1.3	WBGene00007354	0	0	0	0	0	0	0	0.0831624	0.592576	0.271359	0.431615	0	0	0	0	0	0	0	0	0	1.04583	0	0.756571	0	0	0	0.798415	0.894763	0	0	0	0	0	0	0	0	0	0	1.16704	0	0.766797	0.132087	0	0	0	0	0
C06A1.5	rpb-6	WBGene00007355	434.103	544.18	504.613	358.476	325.274	316.738	297.722	247.291	226.344	218.548	268.209	214.731	141.602	304.452	314.289	313.263	330.649	331.207	308.368	326.906	311.232	323.999	273.025	150.612	421.813	377.471	370.209	335.834	327.806	335.853	387.68	389.731	351.53	354.71	358.594	334.128	358.474	343.854	354.297	294.802	390.399	365.049	263.035	193.18	180.311	184.422	230.192
C06A1.6	C06A1.6	WBGene00007356	0	0	0	0	0	0	0	0.168193	0	0.271359	0	0	0	0	1.21477	0	0	0.285077	0	0	0	0	0	0	0	0	0	0	0	0	1.47037	0	0.64903	0.96379	0	0.378748	0	0.405571	0	1.17179	1.43546	0	0.626765	0	0	0	0
C06A1.7	C06A1.7	WBGene00044235	0	0	0	0	2.0746	0	0	0	0	0.271359	0	0.39626	0	0.91434	2.96121	0	0	0	0	0.864842	0	0	0	0	0	0	0	0	1.75289	0	1.47037	0	0.321055	0.448663	0	0	0.333352	0.405571	0	1.17179	0.749543	0	1.59104	0	0	4.53332	0
C06A12.3	C06A12.3	WBGene00007357	0	0	2.06191	0	0	0	0	0.616514	0.503557	0.311639	1.55055	0.718698	0	0	0	0	0	0	0	0	0	0	0	0.853508	0	0	0.596023	0	0	0	0	0	0	0	0	0.378748	0.666786	0	0	0	0	0.132087	1.88075	0	0	0	0
C06A12.4	gcy-27	WBGene00001550	0	0	0	0	0	0	0	0	0	0	0	0	0	0	0	0	0	0	0	1.17145	0	0	0	0	0	0	0	0	0	0	0	0	0	0	0	0	0	0	0	0	0	0	0	0	0	0	0
C06A12.5	lact-6	WBGene00007358	0	0	0	0	0	0	0	0	0	0	0	0	0	0	0	0	0	0	0	0	0	0	0	0	0	0	0	0	0	0	0	0	0	0	0	0	0	0	0	0.801719	0	0	0	0	0	0	0
C06A12.8	C06A12.8	WBGene00007359	0	0	0	0	0	0	0	0	0	0	0	0	0	0	0	0	0	0	0	0	0	0	0	0	0	0	0	0	0	0	0	0	0	0	0	0	0	0	0	0	0	0	0	0	0	0	0
C06A5.1	C06A5.1	WBGene00015499	1.99586	3.90104	5.55977	5.83338	2.41908	3.99409	4.76813	5.45809	7.48188	8.71193	5.02744	4.74462	15.574	7.3026	5.74438	13.3854	2.00598	7.93209	2.87793	4.59536	3.93613	8.10556	8.69966	15.2175	0	2.43173	0.596023	0	3.81568	1.34295	0.90129	0.511496	2.8909	4.49339	1.64737	2.5926	3.22654	1.0525	1.70045	3.16362	3.30176	2.34062	1.09862	3.08628	5.80703	3.67578	16.5056
C06A5.10	C06A5.10	WBGene00015506	0	1.12418	0	2.52071	0	3.05731	0	0.136293	0	0.881649	0	0.861726	0.460292	0	0	0	0.515653	0	0	0	0	0	0	0.853508	0	0.764779	0	0	0	0	0	0	0	0	0	0	0.228094	0	0	0	0	0	0.761264	2.41417	0	0	1.39494
C06A5.11	sir-2.4	WBGene00004803	7.98932	8.62281	5.29951	18.9429	17.6003	10.0291	0.315135	19.572	19.0116	12.1585	13.6432	13.3856	8.21638	4.57394	6.41051	7.3615	4.6457	7.44043	6.00433	5.25021	3.28521	5.05678	11.3228	7.01521	0	2.98848	1.18257	2.14126	0	0	1.5593	1.71702	1.64095	2.22791	3.48557	1.68004	2.33215	3.60483	4.57371	1.99155	3.66096	4.18838	14.9635	8.74026	0	8.78908	6.75283
C06A5.12	C06A5.12	WBGene00044414	3.43383	0	1.68133	6.09729	4.49367	7.12601	1.261	14.9692	17.3287	17.3463	12.0741	13.2216	12.2381	18.0265	13.503	19.2185	15.0793	18.2351	9.98779	20.0795	11.8153	16.1352	11.8736	8.83585	0	10.7912	12.202	16.312	6.52126	13.2125	8.08321	15.7505	14.2671	20.1041	13.4951	10.6371	13.8048	8.20493	11.2555	20.7085	15.4215	18.0019	14.1968	8.75222	0	0	2.28599
C06A5.2	C06A5.2	WBGene00015500	0	0	0	2.62062	0	0	0.630346	1.57906	1.62954	1.83032	1.59039	2.15715	0	0	0.682146	0.74606	0	2.77924	2.87555	1.0191	1.18386	6.44224	3.86865	3.04202	4.45478	7.68406	5.91273	3.04633	5.31136	7.73875	3.3621	5.9597	1.46788	4.7943	1.49555	1.41534	1.16552	4.88843	0	4.16269	3.15784	5.10448	0.674795	2.51869	6.1901	0	1.39494
C06A5.3	C06A5.3	WBGene00015501	79.6897	73.7199	100.474	42.8271	47.6262	94.8944	158.325	10.2802	20.4692	20.7539	24.1734	40.121	115.644	12.7914	13.5632	8.74469	14.782	5.25999	19.2945	16.1992	19.4682	16.3033	14.2198	63.5425	20.2167	55.4774	48.9814	58.1435	37.6909	18.6191	28.613	54.2701	38.6847	37.5133	34.3984	49.2472	30.4276	72.1544	46.1286	47.582	35.9171	29.9605	22.0982	48.4405	105.498	107.967	98.2398
C06A5.4	madf-7	WBGene00015502	0	0	0	0	0	0	0	0	0.123789	0	0	0	0	0	0	0	0	0	0	2.34318	0	0.907762	0	0	0	0	0	1.11373	3.55847	1.39041	0	0	0.279629	0	0	0	0.881329	0	0	0	0	0.264206	0	0	0	0	0
C06A5.5	C06A5.5	WBGene00015503	0	0	0	0	0	0	0	0.102904	0.182698	0.338864	0	1.14961	0.262177	0	0.928387	2.28431	0	0	0	0	0	0	0.28603	0	6.7427	1.94926	3.27963	7.37722	1.77902	1.14071	1.28505	2.62735	2.42866	0.515126	3.2645	3.05836	1.18533	0.405571	2.29837	1.99155	0.766797	1.17909	2.47015	0	0	2.07602	9.68672
C06A5.6	C06A5.6	WBGene00015504	37.8183	19.026	10.4876	11.2232	33.8613	30.9125	35.3373	4.36096	5.7092	8.1445	6.75548	22.0501	53.6182	2.67225	5.10736	3.8727	1.60754	5.29807	2.76843	4.73653	6.94593	1.56792	5.84946	70.7269	1.51999	3.96104	4.94649	1.02754	3.41542	1.39041	2.84435	1.83995	4.7923	0.701253	1.89363	3.7654	1.37304	2.73897	2.30515	6.46201	4.27918	4.72387	19.9639	65.8062	5.80703	3.67578	11.9733
C06A5.7	unc-94	WBGene00006823	197.548	219.75	239.488	145.437	192.761	148.41	199.612	38.2107	47.4797	38.8158	28.9401	72.7678	109.497	8.46742	11.422	18.4599	19.3503	13.2242	12.0179	9.31255	16.1481	11.7884	16.2645	115.148	12.3879	18.3796	8.76557	9.25294	19.9088	5.6249	3.08785	11.5195	8.10671	7.51762	14.3059	11.595	16.6207	19.951	21.7608	30.7621	8.05751	7.96493	39.6338	132.697	58.2096	34.7428	13.508
C06A5.8	C06A5.8	WBGene00015505	10.304	11.3229	20.2939	24.1056	32.6885	31.0716	30.57	14.3284	17.8834	14.4309	17.7826	36.5513	78.6129	5.33031	3.77205	1.58421	0.632987	3.95375	1.5609	1.35713	2.09192	2.52808	4.51337	79.1466	0	0.888768	0.543223	0	0	2.92503	0	0.511496	1.23028	0.851308	0.568734	0.391033	0.228094	0.526187	0	0.819757	0.749543	0.313154	25.4179	60.6606	0	0	0
C06A5.9	rnf-1	WBGene00004380	96.1309	111.316	100.896	70.314	99.2138	68.9805	103.55	51.8902	47.5659	39.9347	35.0668	55.8556	56.7845	37.7482	61.1614	35.6125	51.0998	45.9606	40.2306	27.3213	36.9983	41.3481	41.6268	102.862	32.6151	26.5984	30.6364	24.6212	21.3753	45.7334	32.6046	32.2819	34.8498	32.4067	29.6984	28.4668	31.0786	29.3787	16.9985	24.9304	25.3928	23.4562	55.1287	81.1673	8.19806	7.18983	20.7121
C06A6.2	C06A6.2	WBGene00015507	33.0571	60.2427	27.5757	53.4356	40.4711	36.158	34.9406	15.2756	16.5328	11.8408	14.1106	3.50347	3.93677	11.1551	15.8405	15.8455	10.5541	14.9069	8.95404	7.39885	6.94593	10.6206	12.554	7.2712	4.45478	12.9971	22.2998	27.2516	10.0536	7.19483	10.9639	19.1189	28.5872	12.5972	26.7966	10.6186	22.3113	32.0004	16.7786	10.1477	10.3754	16.7584	4.68741	7.99857	31.8135	30.5293	31.4976
C06A6.3	mvb-12	WBGene00015508	96.1309	117.793	135.693	86.1168	93.9315	107.374	26.7718	133.231	127.302	87.454	98.8636	88.0866	66.4472	39.4375	51.3945	46.6208	50.5117	61.9134	45.7871	32.466	28.3716	27.8426	79.6732	58.2692	4.56109	19.126	21.8085	14.4057	15.6762	13.7474	18.7425	22.8722	12.4738	15.3171	20.1061	21.2089	14.1699	14.7085	8.09557	19.1876	16.6393	24.943	65.5469	32.3755	34.5869	33.2042	27.0494
C06A6.4	C06A6.4	WBGene00015509	38.0891	30.0904	32.1015	62.0734	40.0526	63.0476	29.0011	82.2153	75.3393	74.5119	59.9873	67.4333	53.8586	70.5581	68.3489	60.4275	50.3125	52.2022	59.2093	44.5401	20.8687	42.7855	47.6236	46.003	20.436	24.7722	14.4733	9.18094	24.482	18.5112	13.3898	23.5012	23.3154	20.7846	13.7536	17.1933	16.0916	9.57967	12.2046	11.4071	20.8835	25.3	50.4652	33.8161	0	0	1.68977
C06A6.5	C06A6.5	WBGene00015510	10.9893	8.47744	12.9298	5.14133	4.1497	5.01697	15.367	0.66217	0.283724	0.939061	0.431615	3.46965	8.93348	0.91434	1.27945	0.841967	1.66442	1.02116	3.03362	0.502594	1.83462	1.69163	1.11889	10.9919	0	3.23914	3.83913	6.03495	0	3.37014	3.08785	5.83392	0.482699	4.44486	4.04392	2.34841	1.12213	4.04864	3.6816	11.6895	1.45272	5.56565	1.63908	11.1899	8.19806	0	9.34742
C06A6.7	C06A6.7	WBGene00015511	0	0	0	0	0	0	0	0.136293	0.732126	0.271359	0.289588	0	0	0	0	0	0	0.611429	0.245617	0.516505	0	0	0.28603	0	0	0	1.05571	0	0	0	0	1.4593	1.9392	3.12784	2.04556	0	1.4222	2.05374	1.73603	0	0.749543	0	0	0	0	2.07602	0
C06A8.1	mthf-1	WBGene00015512	113.761	103.035	100.813	136.381	129.237	177.198	165.561	83.8667	77.4057	149.658	139.378	183.568	178.747	69.0361	73.8274	68.996	55.4381	58.0044	61.5139	63.6098	106.367	68.3564	142.464	201.56	18.0406	36.1927	27.1437	25.6114	50.7928	31.7123	36.1926	24.967	28.0322	33.318	29.5349	28.9172	39.5486	34.9769	66.9577	78.223	45.5104	63.0744	116.654	174.09	31.8135	28.1919	14.7635
C06A8.2	C06A8.2	WBGene00015513	92.0176	75.1136	70.2696	49.4806	66.2786	36.0657	76.4511	49.2006	39.3953	28.252	30.0666	44.4335	47.3945	23.1561	32.5064	31.4732	36.6609	36.7794	28.5169	20.9011	8.65451	19.3001	25.1283	61.266	13.474	14.1146	11.0639	11.4159	15.3933	13.8146	8.9715	14.1845	14.8389	11.6495	16.6031	19.5447	13.1317	14.8737	16.3052	7.58771	16.6457	15.325	43.967	50.9068	18.1888	29.5691	24.8864
C06A8.3	C06A8.3	WBGene00015514	5.99052	3.01505	5.17194	6.48325	13.6379	3.04787	2.52323	28.152	29.887	76.2834	88.3138	35.9849	21.312	129.984	102.07	109.415	151.158	118.179	124.972	276.939	486.711	467.86	144.678	19.9809	278.716	195.67	463.504	559.186	232.539	246.893	399.71	519.712	195.51	227.532	439.624	563.796	433.865	606.566	1055.46	1513.37	888.887	870.74	448.616	265.466	499.494	368.317	350.455
C06A8.4	skr-17	WBGene00004823	44.8594	25.9864	41.3901	43.1011	39.1127	22.806	55.1275	31.4409	33.5812	11.3872	11.464	28.1723	43.3323	1.81406	4.10224	6.95069	3.09798	5.11123	3.43554	4.38231	2.88046	0	6.07415	28.4298	3.37094	3.63382	1.82208	0	1.77902	0	1.8028	2.15138	1.87526	0.515126	1.02553	1.72663	1.35022	5.02776	1.37645	7.30915	0	0.132087	26.7023	20.7962	0	8.15132	2.28599
C06A8.5	spdl-1	WBGene00015515	8.98908	6.15024	10.8759	0.263717	0	1.63996	37.071	5.34583	3.78608	0.338864	5.3526	9.91026	29.7837	22.6598	14.696	16.8883	25.7252	15.8688	19.2286	14.63	25.9984	7.76298	9.08167	31.0343	43.3864	68.3543	72.9998	95.2145	67.1275	44.0554	55.9071	66.1702	58.7302	57.0391	60.1155	73.8634	40.3737	66.0769	53.3347	42.4337	36.4156	31.4305	19.4524	47.7606	126.097	229.705	237.975
C06A8.6	C06A8.6	WBGene00015516	0	0	0	0	0	0	0	0.102904	0.112359	0.311639	0	0	0	0	0	0	0	0.334459	0	0	0	0	0	0	0	0.764779	0	0	0	0	0	0	0	0	0	0.460697	0	0	0	0	0	0	0	0	0	0	0
C06A8.7	srh-39	WBGene00005262	0	0	0	0	0	0	0	0	0	0	0	0	0	0	0	0	0	0	0	0	0	0	0	0	0	0	0	0	0	0	0	0	0	0	0	0	0	0	0	0	0	0	0	0	0	0	0
C06A8.8	C06A8.8	WBGene00015517	0	0	0	0.263717	0	0	0	0.326081	0	0.650504	0.579247	0	0	0	0	0	0	0	0	0	0	0.907762	0	0	0	0.764779	0	0	0	0	0	0	0	0	0	0	0	0	0	1.00882	0	0	0	0	0	0	0
C06A8.9	glr-4	WBGene00001615	0	0	0	0	0	0	0	2.18399	2.53112	3.4577	11.5931	1.76293	1.24702	5.16218	5.45881	9.61981	9.78403	4.63178	5.5997	15.778	22.0287	25.6961	14.0992	0.557906	2.93478	1.30829	6.23184	3.12249	4.4846	5.27835	16.8908	10.445	3.74044	2.49023	13.0933	8.07282	13.6237	7.46928	24.5733	14.1688	28.5549	20.3863	12.9482	4.11064	0	0	0
C06B3.1	C06B3.1	WBGene00007360	0	0	0	0	0	0	0	0	0	0	0	0	0	0	0	0	0	0	0	0	0	0	0	0	0	0	0	0	0	0	0	0	0	0	0	0	0	0	0	0	0	0	0	0	0	0	0
C06B3.10	str-250	WBGene00006277	0	0	0	0	0	0	0	0	0	0	0	0	0	0	0	0	0	0	0	0	0	0	0	0	0	0	0	0	0	0	0	0	0	0	0	0	0	0	0	0	0	0	0	0	0	0	0
C06B3.11	srx-42	WBGene00005933	0	0	0	0	0	0	0	0	0	0	0	0	0	0	0	0	0	0	0	0	0	0	0	0	0	0	0	0	0	0	0	0	0	0	0	0	0	0	0	0	0	0	0	0	0	0	0
C06B3.12	srxa-11	WBGene00044114	0	0	0	0	0	0	0	0	0	0	0	0	0	0	0	0	0	0	0	0	0	0	0	0	0	0	0	0	0	0	0	0	0	0	0	0	0	0	0	0	0	0	0	0	0	0	0
C06B3.13	srxa-12	WBGene00044115	0	0	0	0	0	0	0	0	0	0	0	0	0	0	0	0	0	0	0	0	0	0	0	0	0	0	0	0	0	0	0	0	0	0	0	0	0	0	0	0	0	0	0	0	0	0	0
C06B3.14	srxa-13	WBGene00044116	0	0	0	0	0	0	0	0	0	0	0	0	0	0	0	0	0	0	0	1.17145	0	0	0	0	0	0	0	0	0	0	0	0	0	0	0	0	0	0	0	0	0	0	0	0	0	0	0
C06B3.16	C06B3.16	WBGene00189947	0	0	0	0	0	0	0	0	0	0	0	0	0	0	0	0	0	0	0	0	0	0	0	0	0	0	0	0	0	0	0	0	0	0	0	0	0	0	0	0	0	0	0	0	0	0	0
C06B3.2	oac-3	WBGene00007361	0	0	0	0	0	0	0	0	0	0	0	0	0	0	0	0	0	0	0	1.68795	0	0.907762	0	0	0	0.419519	0	0	0	0	0	0	0	0	0	0	1.08187	2.3334	0	0	0.811831	0	0	0.34911	0	0	0
C06B3.3	cyp-35C1	WBGene00007362	0	0	0	0	0	0	0	0	0	0	0	0	0	0	0	0	0	0	0	0	0	0	0	0	0	0	0	0	0	0	0	0	0	0	0	0	0	0	0	0	0	0	0	0	0	0	0
C06B3.4	stdh-1	WBGene00007363	2.03383	4.72109	3.49787	2.11155	2.41908	5.87039	4.76813	4.65724	4.56764	8.79425	9.03708	16.4258	19.9359	6.24626	2.07925	2.33027	3.78802	3.49818	2.53969	1.0191	6.15675	4.1488	8.46836	18.7121	0	2.85124	1.43777	1.78974	0	2.2817	0	4.69373	0.778372	2.31244	2.24823	2.42335	6.7191	6.66729	1.12482	2.94578	1.69515	4.06835	10.1685	16.9278	0	0	1.39494
C06B3.5	stdh-3	WBGene00007364	0	0	0	0	0	0	0	0	0	0	0	0	0	0	0	0	0	0	0	0	0	0	0	0	0	0	0	0	0	0	0	0	0	0	0	0	0	0	0	0	0	0	0	0	0	0	0
C06B3.6	C06B3.6	WBGene00007365	3.43383	6.29533	3.61818	6.56112	5.85826	0.234108	0.315135	3.61515	3.85947	5.59344	4.56656	8.6704	9.76875	0	2.15126	0	0.515653	0.209321	1.48248	3.21086	0.9172	4.0249	2.84746	3.00158	0	0	0	0	0	0	4.5004	0.910325	0.89986	0	0.726952	0	0.657293	0	0.68814	0	2.24918	0.7888	5.71918	8.02724	0	0	0
C06B3.7	C06B3.7	WBGene00007366	0	0	0	0	0	0	0	0	0	0	0	0	0	0	0	0	0	0.79038	0	0	0	0	0	0	0	0	0	0	0	0	0.90129	0	0	0	0	0.593272	0	0	1.13811	0	0	0	0	0	0	0	0
C06B3.8	gcy-32	WBGene00001552	0	0	0	0	0	0	0	0	0	0	0	0	0	0	0	0.595905	0	0	0	0	0	0	0	0	0	0	0	0	0	0	0	0	0	0	0	0	0	0	0	0	0	0	0	0	0	0	0
C06B3.9	str-252	WBGene00006278	0	0	0	0	0	0	0	0	0.182698	0	0	0	0	0	0	0	0	0	0	0	0	0	0	0	0	0	0	0	0	0	0	0	0	0	0	0	0	0	0	0	0	0	0	0	0	0	0
C06B8.1	nhr-150	WBGene00007367	0	0	0	0	0	0	0	0.102904	0	0	0	0	0	0	0	0	0	0	0	1.17145	0	0	0	0	0	0	0	0	0	0	0	0	0	0	0	0	0	0	0	0	0	0	0	0	0	0	1.68977
C06B8.10	srh-218	WBGene00005428	0	0	0	0	0	0	0	0	0	0	0	0	0	0.843547	0	0.792007	0.487201	0	0	0	0	0	0	0	0	0.419519	0.643177	0	3.55847	0	0	0.610073	0.332311	0.637211	0.291736	0	0	0	0	0	0	0	0	0	5.80703	0	0
C06B8.11	C06B8.11	WBGene00007373	0	0	0	0	0	0	0	0	0	0	0	0	0	0	0	0	0	0	0	0	0	0	0	0	0	0	0	0	0	0	0	0	0	0	0	0	0	0	0	0	0	0	0	0	0	0	0
C06B8.2	C06B8.2	WBGene00007368	0	0	0	0	0	0	0	0	0	0	0.291027	0	0	0	0	0	0	0	0	0	0	0	0	0	0	0	0	0	0	0	0	0	0	0	0	0	0	0	0	0	0	0	0	0	0	0	0
C06B8.3	C06B8.3	WBGene00007369	0	0	0	0	0	0	0	0	0	0	0	0	0	0	0	0	0	0	0	0	0	0	0	0	0	0	0	0	0	0	0	0	0	0	0	0	0	0	0	0	0	0	0	0	0	0	0
C06B8.4	str-264	WBGene00007370	0	0	0	0	0	0	0	0	0	0	0	0	0	0	0	0	0	0	0	0	0	0	0	0	0	0	0	0	0	0	0	0	0	0	0	0	0	0	0	0	0	0	0	0	0	0	0
C06B8.6	srh-219	WBGene00005429	0	0	0	0	0	0	0	0.102904	0.285472	0	0	0	0	0	0	0.841967	0	0	0	0	0	0	0	0	0	0	0	0	0	0.76722	0	0	0	0.280663	0	0	0.300071	0	0	0	0.766797	0	0	0	0	0	0
C06B8.7	C06B8.7	WBGene00007372	0	1.12418	0	2.52071	0	0	8.96362	1.26852	1.78418	0.627422	0.655385	1.47204	0	1.81406	0.341031	0	0	0.653332	0.634222	0	2.09192	0	0	0	0	5.28794	4.54015	1.9326	3.55847	1.97973	0	2.06937	4.83898	1.46283	6.58767	6.38225	0.91461	3.04484	2.25642	0.504349	8.30026	1.047	0	0	14.3882	5.1133	16.4357
C06B8.8	rpl-38	WBGene00004452	49.1815	35.8821	54.082	75.9386	72.4847	73.9667	60.9301	100.661	108.958	132.343	110.316	79.3279	66.6839	170.617	133.526	172.264	142.752	167.957	173.68	192.318	226.587	209.607	171.44	105.683	219.55	209.656	243.606	282.879	241.618	233.397	209.575	246.385	249.3	249.389	289.175	248.634	284.943	268.625	226.216	322.796	343.513	294.721	198.497	143.249	296.721	281.508	301.282
C06B8.9	srw-21	WBGene00005768	0	0	0	0	0	0	0	0	0	0	0	0	0	0	0	0	0	0	0	0	0	0	0	0	0	0	0	0	0	0	0	0	0	0	0	0	0	0	0	0	0	0	0	0	0	0	0
C06C3.1	mel-11	WBGene00003196	42.8151	50.4805	57.8463	45.392	49.8617	52.3488	131.943	39.2347	50.8594	48.1732	40.7825	46.1024	42.3283	30.3544	43.445	64.8234	56.1202	47.8988	53.9565	49.8114	68.0347	71.7468	61.3759	52.329	46.6597	68.4603	49.5462	71.6761	60.6891	59.2623	40.7523	54.5629	60.7705	67.8314	50.3578	66.7743	58.0324	65.5104	104.458	101.284	59.0514	64.5613	53.3415	35.3882	94.8292	73.5745	86.1883
C06C3.10	C06C3.10	WBGene00044169	0	0	0	0	0	0	0	0	0.171365	0	0	0	0	0	0.341031	0	0	0	0.295398	0	0	0	0	0	0	2.66696	1.78851	0	0	0.839022	0	0	0.620231	0	0	0	0	0	0	0	0	0	0	0	0	0	0
C06C3.12	C06C3.12	WBGene00175031	0	0	0	0	0	0	0	0.44828	0.524834	0.989451	0.257424	0	0.262177	0	0.404826	0	0.974551	0	0	0	0.9172	0	0.579929	0	0	0	0	0	0	0	3.11898	0	0.556158	0	0	0	0	0	0	0.504349	0	0	0	0	0	0	0
C06C3.3	C06C3.3	WBGene00007374	0	0	0	0	0	0	0	0.168193	0	0	0	0	0	0	0	0.595905	0.632987	0	0.235491	0	0	0	0	0	0	0	0	1.03784	0	0	0	0	0	0	0.247903	0.391033	0	1.06288	0	0	0	0.369881	0.936157	0.34911	0	0	0
C06C3.4	C06C3.4	WBGene00007375	0	0	0	0	0	0	0	0.538557	0.418589	0.338864	0	0	0	2.53126	0.404826	0.792007	0	0	0.879839	0	0	3.13661	0	0	3.04036	0.419519	3.19595	0	1.75289	1.53463	3.60648	1.83995	1.92679	0.746437	0.541891	0	0.333352	0	0.568984	1.63971	0.811831	1.4667	0	0.34911	0	0	0
C06C3.6	srh-48	WBGene00005271	0	0	0	0	0	0	0	0.93506	0	0	0.863335	0	0	0.91434	0.341031	0	0	0.770363	0.426117	0	0	0	1.19154	0	0	1.52975	1.69506	0	0	0	0.90129	0	0.448697	0.234464	0.194083	0	0	0	0	0	1.11261	0	0	0	0	0	0
C06C3.7	C06C3.7	WBGene00007377	0	0	0	0	0	5.16635	5.14113	16.2604	12.3415	18.5836	19.838	5.78722	3.41331	9.89291	11.9134	16.7231	16.1513	4.0372	0.875233	1.00531	6.4329	6.24592	16.2729	0.942699	4.56109	5.41451	1.59702	0.894763	3.81568	0	16.8972	6.0431	6.8709	1.93485	5.26921	0.443315	0.840943	0	5.17841	1.51342	6.32567	2.60688	2.80916	0	0	0	0
C06C3.8	C06C3.8	WBGene00007378	0	0	0	0	0	0	0	0.143794	0.409261	0	0	0.39626	0	0	0	0	0.515653	0	0	0	0	0	0	0	0	0	0	0	1.77902	0	0	0	0.258851	0.466789	0	0	1.14495	0	1.16704	0	0	0	0	0	0	0	0
C06C3.9	C06C3.9	WBGene00014668	0	0	0	0	0	0	0	0.562873	0.294962	0.338864	0	0	0	2.53126	0	0.792007	0	0.368254	0.879839	0	0	0.783866	0	0	3.04036	0.419519	1.85412	0	1.75289	0.76722	2.70453	1.83995	2.25968	0.746437	0.347808	0	0	0	0.568984	1.63971	1.43941	1.33462	0	0.34911	0	0	0
C06C6.1	C06C6.1	WBGene00007379	0	0	0	0	0	0	0	0	0	0	0	0	0	0	0	0	0	0	0.377722	0.502594	0	0	0	0	0	0	0	1.02754	0	0.839022	0	0	0	0	0	0	0.228094	0	0	0	0	0	0	0	0	0	0
C06C6.2	str-233	WBGene00006264	0	0	0	0	0	0	0	0	0	0	0	0	0	0	0	0	0	0	0.426117	0	1.04583	0	0	0	0	0	0	0	0	0	0	0	0	0	0.495675	0	1.0003	0	0	0	0	0.313154	0	0	0	0	0
C06C6.3	str-231	WBGene00006262	0	0	0	0	0	0	0	0	0	0	0	0	0	0	0	0	0	0	0.383242	0	0	0	0	0	0	0	0	0	0	0	0	0	0	0	0	0	0	0	0	0	0	0	0	0	0	0	0
C06C6.4	nhr-63	WBGene00003653	0	0	0	0	0	0	0	0.168193	0	0	0	0	0	2.91227	0	0	0	0	0.613212	0.492291	0	0.783866	0	0	0	0	0	0	1.75289	0	0	1.2445	1.32158	1.15479	0	0	0.604075	0	0	0	0	0	0	0	0	0	0
C06C6.5	nhr-50	WBGene00003640	0	0	0	0	0	0	0	0.681796	0	0	0	0	0	0.970518	0	0	0.515653	0	0.235491	0	0	0	0	0	0	0.764779	0	0	0	0	0	0	0	0	0	0.460697	0	0	0	0	0	0	0	0	0	0	0
C06C6.6	C06C6.6	WBGene00007380	0	0	0	0	0	0	0	0	0	0	0	0	0	0	0	0	0	0	0	0	0	0	0	0	0	0	0	0	0	0	0	0	0	0	0	0	0	0	0	0.504349	0	0	0	0	0	0	0
C06C6.7	C06C6.7	WBGene00007381	0	0	0	0	0	0	0	0	0	0	0	0	0	0	0	0	0	0	0	0	0.9172	0	0	0	0	0	0	0	0	0.839022	0	0	0.22485	0	0	0	0	0	0.568984	0	0	0	0	0.34911	0	0	0
C06C6.8	C06C6.8	WBGene00007382	0	0	0	0	0	0	0	0	0	0	0.257424	0	0	0	0	0	0	0	0	0	0	0	0	0	0	0	0	0	0	0	0	0	0	0	0	0	0.333352	0	0	0	0	0	0	0	0	0	0
C06C6.9	C06C6.9	WBGene00007383	0	0	0	0	0	0	0	0	0	0	0	0	0	0	0	0	0	0	0	1.17145	0	0	0	0	0	0	0	0	0	0	0	0	0	0	0.583543	0	0	0	0	0	0	0	0	0	0	0	0
C06E1.1	C06E1.1	WBGene00015518	2.03383	3.06842	5.55211	0.263717	11.3735	0.936776	4.45284	10.9079	6.6893	13.2253	11.4693	8.89616	3.27177	10.1609	28.7118	18.9294	25.1724	17.553	24.1585	19.4114	11.4118	13.6413	19.2973	3.38135	79.646	88.2357	63.7376	74.3944	78	77.2695	55.3938	58.0199	60.6933	71.832	86.367	74.9087	78.2939	116.319	58.6979	69.9945	86.9097	75.4558	21.3422	13.0502	116.979	191.147	209.782
C06E1.10	rha-2	WBGene00015525	34.6428	25.4583	38.3856	13.401	16.0246	38.7383	57.2304	1.31917	3.88195	5.89207	7.47795	9.58649	11.8144	1.6873	2.74084	1.53807	2.53287	2.80423	3.10481	3.00936	6.03815	1.01287	14.1258	2.91216	1.51999	4.3177	6.25628	8.62712	5.90511	8.74462	2.70453	7.50512	6.44726	3.15638	2.39812	7.98141	5.71584	8.30381	7.39366	15.4177	14.2496	11.9062	13.3411	11.1549	20.1952	29.307	11.9159
C06E1.11	C06E1.11	WBGene00015526	0	0	0	0	0	0	0	0.102904	0	0.627422	0	0	0	0.787395	0.404826	0	0	0	0	0	0	0.783866	0	0	0	0	0.639352	0	0	0	0	1.5204	0	0.466789	1.10402	0.304604	0	0	0	0	0	0	0	0	0	0	0
C06E1.3	C06E1.3	WBGene00015519	0	0	0	0	0	0	0	0	0	0	1.01839	0	0	0	0	0	0	0	0.377722	0	0	2.82862	0	0	0	0	0	0	0	0	0	0	0	0	0	0	0	0	0	0	0	0	0	0	0	0	0
C06E1.4	glr-1	WBGene00001612	0	0	0	0	0	0	0	0	0	0	0	0.39626	0	0	0	0	0	0	0	0	0	0	0	0	0	0	0	0	0	0	0	0	0	0	0	0.528259	0	0	0	0	0.685921	0	0	0	0	0	0
C06E1.5	fip-3	WBGene00015520	0	0	0	0	0	0	0	0	0	0	0	0	0	0	0	0	0	0	0	0	0	0	0	0	0	0	0	0	0	0	0	0	0	0	0	0	0	0	0	0	0	0	0	0	0	0	0
C06E1.6	fipr-16	WBGene00015521	0	0	0	0	0	0	0	0	0	0	0	0	0	0	0	0	0	0	0	0	0	0	0	0	0	0	0	0	0	0	0	0	0	0	0	0	0	0	0	0	0	0	0	0	0	0	0
C06E1.7	C06E1.7	WBGene00015522	0	0	0	0	0	0	0	0	0	0	0	0	0	0	0	0	0	0	0	0	0	0	0	0	0	0	0	0	0	0	0	0	0	0	0	0	0	0	0	0	0	0	0	0	0	0	0
C06E1.8	ztf-30	WBGene00015523	0	0	0	0	0	0	0	0	0.571014	0	0	0.39626	0	0	0.404826	1.98396	0.515653	1.00362	1.12648	0.502594	3.55244	0	0.470541	0	0	0.419519	0	1.11373	1.35263	0	0	0.733	0.22485	0.615118	0.541891	0.391033	0	2.85958	0	0	0	1.14927	0	0	0	0	0
C06E1.9	C06E1.9	WBGene00015524	18.3224	15.1077	14.8671	19.0889	16.5794	25.5516	21.0568	34.2994	34.1612	40.6322	33.2395	35.13	47.9872	17.7438	20.943	22.3906	24.7841	19.4921	18.9524	17.6715	26.4971	25.3542	22.9102	27.1147	18.5896	10.6874	14.3137	9.98626	12.5177	20.584	13.4645	13.4544	8.72491	15.0336	13.6861	12.3112	12.1169	21.1362	12.464	21.2229	11.5597	16.9422	19.9754	20.2886	14.3882	17.0982	21.5002
C06E2.1	C06E2.1	WBGene00015527	0	0	0	0	0	0	0	0	0	0	0	0	0	0	0	0	0	0	0	0	0	0	0	0	0	0	0	0	0	0	0	0	0	0	0	0	0	0	0	0	0	0	0	0	0	0	0
C06E2.2	C06E2.2	WBGene00015528	0	0	0	0	0	0	0	0	0	0	0	0	0	0	0	0	0	0	0	0	0	0	0	0	0	0	0	0	0	0	0	0	0	0	0	0	0	0	0	0	0	0	0	0	0	0	0
C06E2.3	ubc-21	WBGene00006716	0	0	0	0	0	0	0	0	0	0	0	0	0	0	0	0	0	0	0	0	0	0	0	0	0	0	0	0	0	0	0	0	0	0	0	0	0	0	0	0	0	0	0	0	0	0	0
C06E2.5	C06E2.5	WBGene00015529	52.2119	38.1745	62.4839	41.3415	59.1313	55.7999	52.294	53.671	59.4725	58.2741	53.3031	62.9449	57.033	41.9926	52.7752	58.2164	50.5575	66.0039	53.9565	42.568	182.383	231.903	42.4723	37.9732	47.1981	56.0718	63.5619	55.2319	39.6064	57.6727	68.4014	43.251	51.3933	46.7145	58.0272	57.3274	33.4776	46.0164	293.342	316.187	54.9517	51.6946	46.6751	80.8446	97.6758	84.897	91.6982
C06E2.7	ubc-22	WBGene00006717	0	0	0	0	0	0.234108	0	0.102904	0.348342	0.311639	0	0	0	0	0	2.38449	0	0	0.295398	0	2.36801	0.783866	0	0	0	3.302	3.06783	0	0	0	5.69725	1.22029	0.656031	0	0.840636	1.2239	0	0.81124	0.68814	2.01813	0	0.319305	0.337356	0	0	0	0
C06E2.8	ins-9	WBGene00002092	0	0	0	0	0	0	0	0	0	0	0	0	0	0	0	0.595905	0	0	0	0	0	0	0	0	0	0	0	0	0	0	0	0	0	0	0	0	0	0	0	0	0	0	0	0	0	0	0
C06E2.9	C06E2.9	WBGene00044579	0	0	0	0	0	0	0	0.349843	0	0	0	0	0	0	0.341031	0	0	0	0	0	1.18386	3.24103	0	0.557906	0	0	0	0	0	0	0	0	0.22485	0	0	0.89377	0	0	0.568984	0	0	0	0	0	0	0	0
C06E4.1	C06E4.1	WBGene00015530	0	0	0	0	0	0	0	0	0	0	0	0	0	0	0	0	0	0	0	0	0	0	0	0	0	0	0	0	0	0	0	0	0	0	0	0	0	0	0	0	0	0	0	0	0	0	0
C06E4.2	C06E4.2	WBGene00015531	0	0	0	0	0	0	0	0	0.123597	0	0	0	0	0	0	0	0	0.209321	0	0	0	0	0.28603	0	0	0	0	0	0	0	0	0	0.365595	0	0.194083	0.378748	0	0	0	0.504349	0.300779	0	0.626765	0	0	0	0
C06E4.3	C06E4.3	WBGene00015532	0	0	0	0	0	0	0	0.10173	0.123597	0	0	0	0.460292	0	0.587355	0	0	0	0	0	0	0	0	0	0	0	0	0	0	0	0	0	0	0	0	0	0.357222	0	0	0	0.627574	0	0	0	0	0	0
C06E4.4	C06E4.4	WBGene00015533	0	0	0	0	0	0	0	0	0	0	0	0	0	0	0	0	0	0	0	0	0	0	0	0	0	0	0	0	0	0	0	0	0	0	0	0	0	0	0	0	0	0	0	0	0	0	0
C06E4.5	C06E4.5	WBGene00015534	0	0	0	0	0	0	0	0	0.285472	0	0	0	0	0	0	0	0	0	0	0	2.75227	0	0	0	0	0	0	0	0	0	0	0	0	0	0	0	0	0	0	0	0	0	0	0	0	0	0
C06E4.6	C06E4.6	WBGene00015535	0	0	0	0	0	0	0	0	0	0	0.257424	0	0	0	0	0	0	0	0	0	0	0	0	0	0	0	0	0	0	0	0	0	0	0	0.495867	0	0	0	0	0	0	0	0	0	0	0	0
C06E4.7	glb-2	WBGene00015536	0	0	0	0	0	0	0	0	0	0	0	0	0	0	0	0	0	0	0	0	0	0	0	0	0	0	0	0	0	0	0	0	0.223847	0	0	0	0	0	0	0	0	0	0	0	0	0	0
C06E4.8	C06E4.8	WBGene00015537	0	0	0	0	0	0	0	0	0	0	0	0	0	0	0	0	0	0	0	0	0	0	0	0	0	0	0	0	0	0	0	0	0	0	0	0	0	0	0	0	0	0	0	0	0	0	0
C06E7.1	sams-3	WBGene00015538	137.989	141.322	192.341	172.005	171.311	201.277	230.215	78.9151	95.8689	126.154	113.443	122.23	175.184	53.9875	46.5275	38.3488	48.2302	53.0116	59.0414	59.0762	94.1754	114.152	50.6567	171.01	106.263	79.8128	54.3229	55.7363	49.2847	54.6019	48.2306	41.4667	59.3331	50.0416	52.4169	65.024	69.6912	61.2313	49.8063	66.6039	54.869	63.8306	79.355	68.1552	18.1888	29.1071	44.86
C06E7.2	C06E7.2	WBGene00015539	0	1.94423	0	0	0	0	0	0	0.988405	0	0	0	2.48488	0	0.533593	0	2.92386	3.51837	0.383242	1.17145	0	0	0	0	0	1.0783	0	0	0	3.02119	0	0	0	0.448663	0	0.378748	0	0.526187	0	0	0.300779	0.132087	0	0	0	2.07602	1.39494
C06E7.3	sams-4	WBGene00015540	238.923	205.341	198.93	219.392	231.906	232.629	192.535	127.376	135.157	97.4904	105.855	233.864	166.73	63.2647	60.1821	64.933	57.3019	63.2325	58.0225	34.2722	35.8557	42.1758	76.273	123.804	39.4716	39.223	30.7664	33.387	68.706	30.4177	24.8463	33.6185	44.6717	31.3496	40.5375	38.5821	30.8047	34.7144	32.8591	40.8373	30.0958	38.964	114.251	90.2143	30.1903	28.0345	59.6463
C06E7.4	C06E7.4	WBGene00015541	3.43383	0	1.68133	2.88434	2.0746	0.702496	5.08349	9.44037	9.23193	7.24758	13.0206	7.78529	5.32623	11.6205	22.4975	12.6488	14.8929	7.6205	12.5594	12.4103	10.8753	8.68056	16.6028	5.65196	2.93478	3.86691	4.55231	8.91744	3.55847	7.13957	22.8837	6.02608	5.87292	7.03206	7.18284	4.9887	9.07003	2.51109	4.71632	3.28023	5.10331	8.4777	8.25956	7.33776	0	3.03728	0
C06E7.6	spe-27	WBGene00004973	0	0	0	0	0	0	0	0	0	0	0	0	0	0	0	0	0	0	0	0	0	0	0	0	0	0	0	0	0	0	0	0	0	0	0	0	0	0	0	0	0	0	0	0	0	0	0
C06E7.7	srv-17	WBGene00005728	0	0	0	0	0	0	0	0	0	0	0	0	0	0	0	0	0	0	0	0	0	0	0	0	0	0	0	0	0	0	0	0	0	0	0	0	0	0	0	0	0	0	0	0	0	0	0
C06E7.88	C06E7.88	WBGene00189995	0	0	0	0	0	0	0	0	0	0	0	0	0	0	0	0	0	0	0	0	0	0	0	0	0	0	0	0	0	0	0	0	0	0	0	0	0	0	0	0	0	0	0	0	0	0	0
C06E8.3	prk-1	WBGene00004182	8.1383	12.1421	1.80887	3.16887	3.62906	5.08652	6.97731	8.58778	10.739	6.14217	6.63612	10.6495	9.93148	8.41102	2.74084	7.04653	0.974521	5.52522	3.51368	0.516505	3.00912	5.35714	4.63064	19.8908	0	1.77775	2.19305	0	1.35263	1.53463	0	0	1.92227	0	0.991472	1.37075	1.19816	0.990855	2.89671	0	1.05032	1.1588	3.21032	8.86101	0	0	0
C06E8.5	C06E8.5	WBGene00015544	0	0	0	0	0	0	0	0	0.123597	0.627422	0	0.359305	0	0	0	0	0	0	0	0	0	0	0	0	0	0	0	0	0	0	0	0.511496	0	0	1.30114	0	0	0	0	0.801719	0	0	0.626765	0	0	0	0
C06G1.1	C06G1.1	WBGene00015545	0	0	0	5.24189	0	0	0	1.57267	1.22823	2.22335	2.55856	0	0.642142	0.91434	2.70726	2.28431	2.92437	0.837592	2.68794	1.97983	0	1.81574	2.6066	0	1.51999	1.65355	3.02432	0	1.75289	3.50057	4.64715	6.02608	0.887302	1.51727	1.51675	1.89308	2.43477	0	5.95862	3.11705	4.96269	1.29707	0	0.698306	0	0	1.39494
C06G1.2	C06G1.2	WBGene00015546	0	0	0	0	0	0	0	0	0	0	0	0	0	0	0.341031	0	0	0	0	0	0	0	0	0	0	0	0	0	0	0	0	0	0	0	0.82749	0	0	0	0	0	2.13881	0	0	0	0	0	0
C06G1.4	ain-1	WBGene00015547	8.1383	7.11511	7.62218	23.4848	26.1093	17.3415	29.2374	33.9103	24.4379	19.0692	23.8453	29.4911	53.1933	88.3299	49.6585	62.1643	69.9541	34.2379	31.431	68.3131	105.8	88.2922	24.5505	63.0607	94.6019	131.193	76.8903	69.0016	72.4948	81.7718	105.548	128.078	99.0074	106.951	100.072	81.172	87.2012	116.361	89.958	132.733	79.0966	100.448	39.0865	74.245	275.939	301.452	286.411
C06G1.5	C06G1.5	WBGene00015548	0	0	0	0	0	0	0	0	0.123789	0	0	0	0	0.970518	0.341031	0.74606	0	0.570224	0	0.492291	1.04583	0	0	0	0	0.888768	0	0	0	0.76722	0	0	0.65943	0.448663	0	0	0.540871	0	0	0.504349	0	0.812356	0	0	0	3.03728	0
C06G1.6	C06G1.6	WBGene00077591	0	0	0	0	0	0	0	0	0	0	0	0	0	0	0	0	0	0	0	0	0	0	0	0	0	0	0	0	0	0	0	0	0	0	0	0	0	0	0	0	0	0	0	0	0	0	0
C06G3.1	nhr-105	WBGene00003695	3.43383	0	2.06191	1.31923	4.64887	0	0.630346	6.31384	4.96749	4.58917	5.11294	5.61253	1.76118	0.91434	0.745857	0.792007	1.49017	1.59171	2.27673	2.01111	12.8974	5.16167	1.98485	2.26513	0	1.96706	0.543223	2.81728	0	3.90809	0.90129	2.01728	2.70154	0.917942	1.96286	1.05397	7.36779	5.73086	41.0025	43.9493	0.685921	1.21325	3.28846	4.68265	6.1901	4.15255	3.68093
C06G3.10	cogc-2	WBGene00000585	28.0312	12.7249	14.5975	3.57597	1.20939	16.6113	20.0547	5.16445	4.26074	6.45344	9.08783	18.6438	32.346	0.91434	3.38306	6.1459	2.09495	3.29641	3.08939	3.26563	3.79811	4.0249	5.594	20.517	1.51999	16.0458	6.73189	17.2326	7.37415	6.12915	10.9728	6.67407	6.69997	4.87249	4.46381	7.32152	6.80072	9.031	10.5497	3.91916	5.57456	9.16704	24.7566	11.0975	30.7903	12.3049	33.2027
C06G3.11	tin-9.1	WBGene00006572	14.2473	14.9746	12.8209	38.8922	29.6091	30.8834	34.153	64.8238	63.4638	76.8892	60.54	52.3441	58.2071	53.45	48.8671	61.8863	54.1636	62.8328	53.4717	55.9422	46.3464	63.4514	37.2521	37.2488	26.5255	28.1123	27.9526	25.6016	23.9508	24.5511	42.0534	19.6809	25.8588	37.6987	38.6713	37.1154	23.2685	21.0708	30.8041	20.0548	28.1399	19.2003	19.2954	29.7786	19.8135	31.0146	21.525
C06G3.2	klp-18	WBGene00002228	34.6428	36.9267	40.679	85.3731	81.2535	57.4087	42.4228	105.69	99.2708	85.03	87.4253	71.7685	60.2567	44.6951	49.1243	59.3965	44.2992	60.9147	42.3984	36.3572	19.0047	31.3335	61.2607	54.773	7.49588	24.6318	19.0835	41.8855	13.2403	11.2862	21.7937	18.8097	25.4089	14.1209	23.4515	26.3782	25.5442	26.9301	12.1633	10.3592	18.7394	30.0232	56.855	41.359	36.0002	48.2973	55.7971
C06G3.3	C06G3.3	WBGene00015549	0	0	0	0	0	0	0	0	0	0	0	0	0	0	0	0	0	0	0	0	0	0	0	0	0	0	0	0	0	0	0	0	0	0	0	0	0	0	0	0	0	0	0	0	0	0	0
C06G3.4	C06G3.4	WBGene00015550	0	0	0	0	0	0	0	0	0	0	0	0	0	0	0	0	0	0	0	1.7299	0	0	0	0	0	0	0	0	0	0	0	0	0	0	0	0	0	0	0	0	0	0	0	0	0	0	0
C06G3.5	C06G3.5	WBGene00015551	10.9893	12.1421	7.36864	12.3558	7.93286	18.8842	13.3825	6.4331	9.4972	7.31282	13.5793	8.61405	11.1463	10.6497	4.04961	7.98752	6.85806	5.71728	9.89215	12.1259	10.4992	11.004	4.8878	8.98051	5.97514	4.13766	2.34222	6.90214	3.13164	2.18197	5.54888	5.8462	5.27922	6.34279	2.66836	4.66712	6.60853	5.71035	5.97375	5.61332	8.26238	6.36869	9.49882	17.5608	16.3981	6.22959	14.1767
C06G3.6	C06G3.6	WBGene00015552	42.8151	78.2851	55.395	79.3793	33.7394	55.783	39.2681	25.6735	22.4019	16.3547	19.0184	17.0679	10.5865	34.0502	30.1074	38.3954	35.919	29.3356	33.0671	28.263	23.5084	25.507	29.1572	11.5157	13.8023	25.4074	29.8155	25.8721	30.8454	21.5343	31.3796	41.3302	27.1143	21.7621	30.7385	29.9891	24.6169	28.0545	33.2584	16.9316	24.8799	25.0677	25.5934	10.4647	12.3817	27.9706	27.2651
C06G3.7	trxr-1	WBGene00015553	32.601	28.6339	28.5536	40.5412	45.2805	46.8496	31.8765	35.5805	35.8422	58.1983	48.0712	37.3206	37.0102	54.8104	43.5499	48.7008	45.9018	55.0342	49.9281	48.4601	70.5924	57.0532	59.5554	41.7965	28.0473	62.4532	53.9136	46.8075	54.4582	53.2988	46.1567	58.0547	47.5025	41.3503	48.2489	51.4725	48.1247	47.4808	38.1665	57.9205	44.8926	46.6145	29.1948	48.203	97.4	84.5718	83.6036
C06G3.8	C06G3.8	WBGene00015554	13.7404	7.71214	18.2673	17.7418	20.8863	4.85184	9.90926	30.5611	30.0381	20.1428	20.3124	18.4057	12.7378	25.3095	28.1804	27.4833	16.9089	29.4292	15.6637	7.75162	1.04583	5.76991	22.1634	8.33451	0	6.17966	7.00747	2.15157	3.81568	4.64128	9.35536	10.1315	6.50654	5.87119	5.02173	4.88577	3.08401	2.05374	4.77804	3.43221	5.05992	7.73381	27.622	9.48318	0	7.5706	5.07054
C06G3.9	C06G3.9	WBGene00015555	8.1383	13.2542	20.6828	13.3334	11.2176	6.971	6.40213	2.81318	3.44793	1.89874	4.14812	5.32127	5.8186	6.37282	5.17082	5.01636	4.76254	3.64734	2.96417	2.05249	0	3.64631	1.15206	17.3182	0	7.23761	2.47323	11.7678	3.84181	5.26481	7.07908	8.73989	6.44249	4.61358	6.65431	3.88421	7.26161	9.10155	12.6753	5.73103	0.685921	1.29023	3.07563	5.78969	36.0002	23.0759	15.4245
C06G4.1	C06G4.1	WBGene00015557	89.5532	69.4491	103.813	47.4614	44.7122	62.5878	100.647	43.9145	39.9751	46.7462	38.2551	71.5838	100.388	29.3068	24.1236	19.3113	25.1598	25.6029	26.3014	29.85	25.0587	25.3885	42.5378	97.6464	10.4314	12.7586	7.61498	9.46397	8.98492	19.4577	16.3564	8.96494	12.2629	16.7935	13.7525	11.6585	15.6082	19.5306	15.8571	32.7072	14.7316	18.4047	70.8402	71.0351	0	4.53332	4.18585
C06G4.2	clp-1	WBGene00000542	51.2016	54.4923	58.0901	68.8452	65.0326	70.6874	61.5856	93.3316	84.4095	72.3585	74.006	67.5062	43.6418	119.723	107.003	66.5797	82.3354	101.167	86.1725	97.9077	85.8558	84.716	98.0472	60.8358	88.9075	97.3155	74.0448	72.6808	88.1493	80.038	68.2751	95.4642	87.9607	81.9779	84.0668	102.791	95.1573	80.7714	77.7205	56.9265	68.0684	81.0209	53.3012	36.7491	14.0051	28.9858	39.9747
C06G4.4	C06G4.4	WBGene00015558	6.10298	24.7541	17.1764	0	4.64887	5.01697	5.77147	0	0.615724	0.271359	1.17303	1.58042	0.524419	1.8289	1.74644	1.58803	0	0.906072	0	2.74266	0	1.62032	1.24428	6.64269	0	0.888768	0	1.11373	1.35263	0	0	0	0.365595	0.468985	0.357944	0	0.228094	0	0	0	0	0.8688	1.78505	0	0	3.67578	0
C06G4.5	npr-17	WBGene00015559	0.997811	0	0	0	0	2.50818	0.315135	0.330706	0.455789	0.271359	0.364358	0	0	0.970518	0	1.4923	0	0.404651	0.491294	0.502594	0	0	0	1.70722	0	0	0	1.03784	0	0	1.28505	0	0.223847	0.466789	0.194083	0	0	0.405571	0	0	0.300779	0	0	0	0	0	0
C06G4.6	C06G4.6	WBGene00044446	0	0	0	0	0	0	0	0	0	0	0	0	0	0	0	0	0	0	0	0	0	0	0	0	0	0	0	0	0	0	0	0	0	0	0	0	0	0	0	0	0	0	0	0	0	0	0
C06G8.1	swt-3	WBGene00007384	0	0	0	0	0	0	0	0	0	1.24701	0.291027	0	0	0	0.341031	0	0	0.607051	0	0	0	0	0	0	0	0	0	1.11373	0	0	0	0.610073	0.833151	0.365783	0	0.443315	0.633424	0	0.68814	1.60363	0	2.53496	0	0	0	0	0
C06G8.2	pept-2	WBGene00003876	0	0	0	0	0	0	0	0	0	0	0	0	0	0	0	0	0	0	0	0	1.04583	0	0	0	0	0	0	0	0	0	0	0	0	0	0	0	0	0	0	0	0	0	0	0	0	0	0
C06G8.3	C06G8.3	WBGene00014669	0	0	0	0	0	0	0	0	0.920509	0	1.18483	0	0.262177	0	0	0	0	0	0	0.984703	0	0.783866	1.48544	0	0	0	0	0	0	0	0	0	0	0	0.247903	0	1.20073	0	20.7055	10.946	2.43959	2.38404	0	0.34911	0	0	0
C06G8.4	srd-7	WBGene00005085	0	0	0	0	0	0	0	0	0	0	0	0	0	0	0	0	0	0	0	0	0	0	0	0	0	0	0	0	0	0	0	0	0	0	0	0.391033	0	0	0	0	0	0	0	0	0	0	0
C06H2.1	atp-5	WBGene00007385	245.581	159.144	178.379	285.704	255.522	261.878	264.256	471.918	424.337	539.519	553.818	481.583	447.225	538.486	593.73	524.155	578.792	520.225	578.955	674.869	840.472	768.233	612.641	472.232	383.313	422.151	471.868	446.898	458.719	517.744	467.867	451.349	461.651	469.757	442.699	456.529	558.498	509.819	537.607	464.763	555.761	540.097	461.858	443.92	346.185	275.491	299.527
C06H2.2	C06H2.2	WBGene00007386	34.6428	47.1413	35.0697	29.4171	28.3013	34.6558	52.4005	9.46229	11.282	15.0981	19.4921	19.3501	30.0652	0.970518	0.587355	0.792007	2.58233	2.487	2.52275	3.04509	1.04583	0.907762	19.1708	41.9031	0	6.72369	4.35848	7.5497	1.77902	0.76722	3.98959	4.6815	5.45496	4.42566	4.23316	4.83502	7.125	6.64062	11.4298	7.24629	6.56219	6.5506	26.2479	40.516	43.4375	28.2491	48.8106
C06H2.3	jmjd-5	WBGene00007387	10.304	5.99092	12.9298	17.133	13.1408	13.8672	15.9144	30.4483	23.0124	22.2668	27.7289	30.6017	20.6818	15.4393	14.2564	16.6974	7.97984	13.2419	13.8083	13.154	4.19298	14.9282	24.5283	23.3627	16.4235	2.92163	3.48419	1.9223	12.2086	4.28196	1.47037	3.8935	3.66863	1.49959	6.99633	3.97129	6.58108	8.43654	4.35679	4.44153	16.9427	7.10055	20.258	23.3068	0	3.67578	11.8304
C06H2.4	folt-1	WBGene00007388	0	1.26952	0	2.52071	0	0	0.315135	0	0	0	0	1.11265	0.524419	0.91434	0.404826	0.841967	0.515653	0	0	0	0	0	0.496827	0	0	0	0	0	3.13164	0	0	0.910325	0.600684	0.234464	0.855681	0.832864	0	0.405571	1.12482	0.504349	0	0.8688	0.337356	1.82039	0	0	0
C06H2.5	glb-3	WBGene00007389	0	0	0	0	0	0	0	0	0	0	0	0	0	0	0	0	0	0	0	0	0	0	0	0	0	0	0	0	0	0	0	0	0	0	0	0	0	0	0	0	0	0	0	0	0	0	0
C06H2.6	C06H2.6	WBGene00007390	144.948	165.547	214.521	110.662	95.9688	103.552	97.9908	63.9601	71.2252	90.3824	96.8666	145.32	142.497	28.9623	27.256	29.4491	24.8472	34.5003	26.1957	22.0666	9.97765	22.4156	62.1174	118.647	14.133	18.1081	12.7838	13.2065	6.97389	10.0847	12.8061	14.866	14.7199	4.68726	12.6268	11.7432	16.8127	20.5181	17.5789	17.8957	25.9988	24.5672	92.1205	118.895	38.7746	25.2536	9.77176
C06H2.7	C06H2.7	WBGene00007391	32.601	36.5024	30.6619	44.5232	34.5664	26.7305	11.0901	64.3966	50.5304	30.8842	25.7366	39.9381	29.8627	0.843547	2.76173	0.841967	0.487201	3.38662	1.66545	1.17145	2.10106	2.52808	23.0706	30.7153	0	1.84308	0.596023	0	0	0	0	0	0.985827	0	0	1.18669	0.714531	0.526187	1.37645	0.819757	0.627574	0.132087	23.0076	20.9746	0	0	0
C06H5.1	fbxa-156	WBGene00007392	0	0	0	0	0	0	0	0	0	0	0	0	0	0	0	0	0	0	0	0	0	0	0	0	0	0	0	0	0	0	0	0	0	0	0	0	0	0	0	0	0	0	0	0	0	0	0
C06H5.11	C06H5.11	WBGene00206499	0	0	0	0	0	0	0	0	0	0	0	0	0	0	0	0	0	0	0	0	0	0	0	0	0	0	0	0	0	0	0	0	0	0	0	0	0	0	0	0	0	0	0	0	0	0	0
C06H5.2	fbxa-157	WBGene00007393	0	0	0	0	0	0	0	0	0	0	0	0	0	0	0	0	0	0	0	0	0	0	0	0	0	0	0	0	0	0	0	0	0	0	0	0	0	0	0	0	0	0	0	0	0	0	0
C06H5.6	C06H5.6	WBGene00007394	0	0	0	0	0	0	0	0.614061	0.55614	2.29385	0	0	0	0	0	0	0	1.26328	0	0	0	0	0.622063	0	0	0	0	0	0	0	1.5593	0	0	0.713184	0	1.03659	0	0	0.562342	0.801719	0.300779	1.23844	0	0	0	0	0
C06H5.7	dcar-1	WBGene00007395	0	2.77686	1.81653	0	0	2.74229	0	0.902909	0.249654	0.949171	0.257424	1.59775	0.460292	0	0	0	0.515653	0.285077	0.954951	0	30.746	6.87341	1.04267	0	0	2.62989	0	4.15002	4.91109	0	1.47037	0	0.944831	1.19998	0.899836	0.904013	3.02199	1.39643	69.4537	67.3109	6.2492	4.47961	0.964121	4.5451	0	5.1133	12.477
C06H5.8	C06H5.8	WBGene00044795	0	0	0	0	1.20939	0	0	0.331854	0.192642	0	0	0	0	0	0	0	0	0.202301	0	0.516505	0.9172	1.56792	0	0	0	2.86904	0	0	1.75289	0.76722	0	0	0.223847	0	0.291736	0	0	0	9.10187	3.63961	0	0.369881	0.337356	0	0	0	0
C07A12.1	ham-2	WBGene00001821	0	0	0	0	0	0	0	0	0	0	0	0	0	0	0	0	0	0	0	0	0	0	0	0	0	0	0	0	0	0	0	0	0	0	0	0	0	0	0	0	0	0	0	0	0	0	0
C07A12.18	C07A12.18	WBGene00206364	0	0	0	0	0	0	0	0	0	0	0	0	0	0	0	0	0	0	0	0	0	0	0	0	0	0	0	0	0	0	0	0	0	0	0	0	0	0	0	0	0	0	0	0	0	0	0
C07A12.2	C07A12.2	WBGene00015560	0	0	0	0	0	0	0	0	0	0	0	0	0	0	0	0	0	0	0	0	0	0	0	0	0	0	0	0	0	0	0	0	0	0	0	0	0	0	0	0	0	0	0	0	0	0	0
C07A12.3	nhr-35	WBGene00003628	3.99271	2.77686	1.68133	3.14812	2.0746	0.702496	0.315135	3.50413	3.85859	5.93292	5.05474	8.21992	3.43912	4.43036	13.6045	9.81568	13.8953	3.40147	4.51776	1.88394	12.8502	9.47514	6.39972	7.36607	9.24123	16.4909	5.98175	8.97768	0	4.83334	14.732	44.2591	3.8113	5.47227	9.69815	5.9049	8.08252	12.6336	5.76552	20.8909	5.67197	7.91143	7.66269	11.2672	5.80703	12.7898	3.37995
C07A12.4	pdi-2	WBGene00003963	81.7431	59.9297	46.3119	234.298	121.141	204.131	190.189	522.182	511.418	461.364	647.824	466.403	311.958	756.044	794.24	707.55	949.476	608.807	767.788	896.885	1243.22	1131.3	812.488	353.986	669.352	810.125	740.456	777.776	703.589	687.614	929.508	1013.53	605.526	693.046	641.3	552.888	822.998	1064.05	1349.32	1419.52	1070.92	1178.82	770.183	361.666	794.865	890.983	818.362
C07A12.5	spr-3	WBGene00005008	81.7431	82.5743	60.4318	111.3	53.4485	30.6754	48.7653	80.8287	79.2577	51.0136	58.3085	37.6315	43.5379	101.43	89.4097	101.89	105.746	88.5553	87.3839	82.8592	74.9114	68.4675	75.722	65.831	70.08	52.1799	48.7216	41.8925	76.7386	71.7876	48.3352	51.142	57.6248	75.8857	76.3809	59.7746	72.5654	57.0203	32.6943	68.7478	117.935	109.371	67.4479	48.2437	66.4117	53.4914	40.9096
C07A12.7	C07A12.7	WBGene00015561	24.4388	20.5485	21.8459	34.4561	28.8651	21.6337	24.196	31.7045	37.1646	33.1772	35.7348	27.2961	21.527	24.1666	44.425	46.1975	53.3315	38.4141	39.5146	44.0866	89.0603	132.383	53.5583	5.91474	47.4205	32.4029	49.3116	36.942	25.3771	43.1009	52.136	75.7915	33.2958	38.1846	48.9826	49.8795	46.7317	48.4638	130.534	166.498	46.7272	57.8711	22.9824	40.7402	48.5974	34.8592	24.9916
C07A4.1	tiar-3	WBGene00007396	0	0	0	0	0	0	0	0.428985	0	1.255	0.291027	0.376627	0	0	0	0	0	0	0.245617	0.516505	2.36801	2.63319	0.579929	0	3.37094	0	0	0	0	0	0	0	0.620231	0.380654	0	0	0	0	0.562342	0	2.43959	1.28407	1.87254	0	0	0	0
C07A4.2	C07A4.2	WBGene00007397	0	0	0	0	0	0	0	0	0	0.311639	0	0	0	0	0	0.841967	0.974521	0	0	0	1.83462	4.05298	0	0	0	0	0	0	0	0	0	0	0	0	0	0	0.300071	1.06288	3.5915	0	0.902559	0	0	0	0	0	0
C07A4.3	C07A4.3	WBGene00007398	0	0	0	0	0	0	0	0	0	0	0	0	0	0	0	0	0	0	0	0	0	0	0	0	0	0	0	0	0	0	0	0	0	0	0	0	0	0	0	0	0	0.132087	0	0	0	0	0
C07A9.1	clec-162	WBGene00007399	0	0	1.68133	0	0	0	0	0	0	0	0	0	0	0	0	0	0	0	0	0	0	0	0	0	0	0	0	0	0	0	0	0	0	0	0	0	0	0	0	0	0	0	0	0	0	0	0
C07A9.10	C07A9.10	WBGene00007406	0	0	0	0	0	0	0	0	0	0	0	0	0	0	0	0	0	0	0	0	0	0	0	0	0	0	0	0	0	0	0	0	0	0	0	0	0	0	0	0	0	0	0	0	0	0	0
C07A9.11	ncx-7	WBGene00003572	0	2.3937	1.81653	0	0	0	0	0.430683	0	0	0	0	0.379964	0.91434	0	0	0	0	0	0	0	0	0.28603	0.853508	0	1.0783	0	0	0	0	0	0	0	0	0	0	0	0	0	0	0	0	0	0	0	0	0
C07A9.12	C07A9.12	WBGene00043994	0	0	0	0	0	0	0	0	0.245476	0	0	0	0	0	0	0	0.487201	0	0	0.492291	0	0	0	0.853508	0	0	0	0	0	0	0	0	0	0	0.357944	0	0	0	0	0	0	0.264206	0	1.1877	0	0	0
C07A9.13	C07A9.13	WBGene00044227	0	0	0	0	0	0	0	0	0.123789	0	0	0	0	0	0	0	0	0	0	0	1.18386	0	0	0	0	0	0	0	3.5062	0	0	0	0	0	0	0	0	0	0	0	0	0	0	0	0	0	0
C07A9.2	C07A9.2	WBGene00007400	128.712	91.2977	120.331	167.185	117.266	118.184	127.684	126.91	124.941	130.522	142.686	105.83	99.9997	164.003	185.09	153.156	178.662	198.686	187.173	161.337	145.312	185.749	159.776	78.5018	144.783	154.858	147.867	128.302	137.48	152.112	176.272	150.47	140.102	154.944	155.786	143.669	117.901	108.736	80.248	89.8477	120.556	112.826	80.5645	103.003	155.968	105.325	160.677
C07A9.3	tlk-1	WBGene00006579	99.9231	72.3897	93.6723	102.837	117.971	139.282	111.26	168.453	176.196	160.763	160.174	177.825	128.415	277.437	234.12	299.863	260.848	261.142	242.051	231.858	214.436	214.033	174.018	114.84	353.725	309.303	282.829	269.356	262.816	320.724	272.297	344.895	314.966	301.039	294.845	294.849	219.359	175.056	136.528	223.008	223.854	226.346	185.075	124.446	276.691	207.899	240.539
C07A9.4	ncx-6	WBGene00003571	0.997811	1.94423	0	0	6.72346	11.1323	0	0.102904	0.417387	0	0	0.376627	0	0	0.404826	2.28431	0	0.411622	0.828683	0	0	0	0.579929	0.557906	0	0.764779	0	0	0	1.14071	1.28505	0.511496	0.889711	1.15479	0	0	0	0	0	0	0	0.313154	0	0	0	0	3.9626
C07A9.5	C07A9.5	WBGene00007401	0	0	0	0	0	0	0	0	0	0	0	0	0	0	0	0	0	0	0	0	0	0	0	0	0	0	0	0	0	0	0	0	0	0	0	0	0	0	0	0	0	0	0	0	0	0	0
C07A9.6	ugt-60	WBGene00007402	0	0	0	0	0	0	0	0	0	0	0	0	0	0	0	0	0	0	0	0	0	0	0	0	0	0	0	0	0	0	0	0	0	0	0	0	0	0	0	0	0	0	0	0	0	0	0
C07A9.7	set-3	WBGene00007403	12.2104	16.2338	15.7569	32.9188	40.8413	45.8609	36.9943	51.0204	56.4812	66.6759	62.1652	58.7191	79.4036	52.5398	56.0564	44.6318	56.8385	54.2148	54.7503	53.9135	67.0028	56.0107	44.8922	59.2734	39.9131	57.057	32.3418	32.3537	52.0273	40.006	52.3592	38.5532	47.5026	60.3164	60.7656	41.1208	43.4474	47.947	46.3765	58.9777	36.2232	42.6011	60.7094	69.272	52.7831	69.5236	73.1186
C07A9.8	C07A9.8	WBGene00007404	0	0	0	0	0	0	0	0	0	0	0	0	0	0	0	0	0	0	0	0	1.83462	0	0	0	0	0	0	0	0	0	0.90129	0	0.327975	0	0	0	0.228094	0	0	0	0	0	0	0	0	0	0
C07A9.9	C07A9.9	WBGene00007405	15.9943	16.8418	9.43916	8.81785	22.9634	8.62355	9.85348	2.48873	1.2424	1.56664	2.61267	8.86587	13.5854	0	0	0	0	0	0.245617	0	0	0	1.74021	5.47393	0	0	0	0	0	0	0	0	0	0	1.13761	0	0	0	0	0	0	1.41347	4.3306	6.30735	0	3.03728	0
C07B5.2	C07B5.2	WBGene00007407	0	0	0	0	0	0	0	0	0	0	0	0	0	0	0	0	0	0	0	0	0	0	0	0	0	0	0	0	0	0	0	0	0	0	0	0	0	0	0	0	0	0	0	0	0	0	0
C07B5.3	C07B5.3	WBGene00007408	0	0	0	0	0	0	0	0	0	0	0	0	0	0	0	0	0	0	0	0	0	0	0	0	0	0	0	0	0	0	0	0	0	0	0	0	0	0	0	0	0	0	0	0	6.1901	0	0
C07B5.4	C07B5.4	WBGene00007409	0	0	0	0	0	0	0	0	0.112359	0	0	0	0	0	0	0	0.515653	0	0	0	2.09192	1.01287	0	0	0	0	0	0	4.12609	0	0	0.910325	0	0	0.357944	0	0	0	0	0	0	0.237794	0	0	0	0	0
C07B5.5	nuc-1	WBGene00003828	0	0	0	0	0	0	0	0.377215	0.399934	0.271359	0.291027	0.39626	0	3.51626	6.23332	8.28259	7.98115	7.10727	9.42954	3.74082	1.04583	1.81574	0	0	48.3413	38.1703	45.1118	18.9046	62.6048	15.9754	11.2854	4.82309	15.9718	11.8509	13.6734	6.18017	7.31404	14.2155	2.06493	1.62148	3.63689	1.2848	2.49931	0	399.47	438.416	488.555
C07B5.6	C07B5.6	WBGene00007410	0	0	0	0	0	0	0	0	0	0	0	0	0	0	0	0	0	0	0	0	0.9172	1.01287	0	0	0	0	0	0	0	0	0	0	0	0	0	0	0	0	0	0.504349	0.811831	0.132087	0	0	0	0	0
C07B5.8	C07B5.8	WBGene00195209	0	0	0	0	0	0	0	0.12722	0.208403	0	0	0	0	0	0	0	0	0.651847	1.03933	0.864842	0	0	0.28603	0.853508	14.6764	0.888768	4.40003	1.11373	8.01694	0	0	0.511496	2.54898	2.78019	2.85156	1.28585	0	0.405571	1.73603	0.801719	0	1.4667	0	0.593779	31.4347	17.1053	18.1598
C07C7.1	C07C7.1	WBGene00007411	0	0	0	0	0	0	0	0	0	0	0	0.39626	0	0	0	0	0.974551	0	0	0	0	0	0	0	0	0	0	0	0	0	0	0	0	0	0	0	0	0	0	0	0	0	0	0	0	0	0
C07D10.1	C07D10.1	WBGene00015566	0	0	0	0.263717	4.64887	0	0.630346	0.612333	0	0	0	0	0.379964	0.843547	0.992181	0	0	0	0	0	0.9172	2.35217	0	0	0	0	0	1.03784	0	0	0	0	0.329675	0	0	0	0.604075	0	2.29186	1.17179	1.53378	0.574563	0	0	0	2.07602	0
C07D10.2	bath-44	WBGene00015567	28.5189	26.9927	14.4775	40.9419	53.4479	36.9293	37.8919	40.5979	38.7978	28.972	31.8992	71.7548	118.313	22.4743	13.0629	11.8123	13.7809	9.6914	12.7071	9.83409	20.2285	18.1582	34.5747	95.8935	14.8887	13.2925	17.2942	19.4777	10.0283	17.304	14.3763	13.7848	12.3871	15.0009	11.2118	18.1493	16.4755	13.9064	19.3333	28.328	10.2575	14.4172	51.3109	119.918	14.0051	26.7534	22.0948
C07D10.3	sre-3	WBGene00015568	0	0	0	0	0	0	0	0	0	0	0	0	0	0	0	0	0	0	0	0	0	0	0	0	0	0	0	0	0	0	0	0	0	0	0	0	0	0	0	0	0	0	0	0	0	0	0
C07D10.4	nas-7	WBGene00003526	0	0	0	0	0	0	0	0.0831624	0.285472	0.311639	0	0	0	0	0	0	0	0	0	1.0191	16.1481	16.2993	0	0	0	1.49782	0.596023	0	1.77902	0	0	0	0.258851	0	0.495675	2.74706	1.0375	0	51.1271	30.1097	0.766797	0	0	5.59602	0	0	0
C07D10.5	C07D10.5	WBGene00015569	10.304	16.4975	30.6637	23.9994	15.3694	38.6839	15.3349	46.1113	41.7662	30.463	33.1993	25.9883	16.9198	71.3943	78.5454	76.5273	92.4022	79.3372	108.36	112.537	192.678	143.132	60.6767	19.4994	128.74	181.398	209.519	219.758	166.463	165.264	171.715	151.476	163.593	183.608	196.924	199.191	161.684	196.618	254.452	321.791	188.288	207.421	82.9661	108.01	213.456	190.992	225.788
C07D10.6	C07D10.6	WBGene00044673	0	0	0	0	0	0	0	0	0	0	0	0	0	0	0	0	0	0	0	0	0	0	0	0	0	0	0	0	0	0	0	0	0	0	0	0	0	0	0	0	0	0	0	0	0	0	0
C07D8.5	C07D8.5	WBGene00015564	0	0	0	0	0	0	0	0	0	0	0	0	0	0	0	0	0	0	0	0	0	0	0	0	0	0	0	0	0	0	0	0	0	0	0	0	0	0	0	0	0	0	0	0	0	0	0
C07D8.6	C07D8.6	WBGene00015565	342.173	206.664	261.672	294.816	207.05	390.77	436.283	333.516	300.104	345.644	405.824	636.487	529.658	414.127	441.054	357.389	376.708	393.916	425.155	408.242	547.947	454.345	349.702	519.498	305.34	297.686	381.306	356.772	338.638	316.976	428.774	385.509	375.806	347.893	392.701	346.741	337.562	388.969	403.894	282.761	289.299	305.953	314.201	351.77	204.846	195.567	111.523
C07E3.1	stip-1	WBGene00007412	23.0115	19.8589	9.43105	11.1239	18.135	18.7281	7.34869	35.1744	37.4534	37.2099	25.4923	26.9483	20.9095	45.0897	51.1048	58.8256	63.424	65.0857	56.0977	51.4532	50.8784	37.1174	30.5369	21.0697	58.7437	66.7724	54.7656	63.1174	47.2224	70.5469	48.1998	55.9682	54.7577	57.7786	46.8766	53.8573	56.9902	39.7554	47.6646	41.7382	55.8499	64.511	46.7087	17.256	26.3868	37.1042	46.5601
C07E3.10	C07E3.10	WBGene00007420	0	0	0	0	0	0	0	0	0	0	0.728805	0	0	0	0	0	0	0	0	0	0	0.783866	0	0	0	0	0	0	0	0	0	0	0	0.234464	0.492828	0.304604	0	0	0	0	0	0	0	0	0	0	0
C07E3.2	pro-2	WBGene00007413	44.8594	95.1887	76.7149	71.0828	43.0425	76.842	90.2926	38.8558	38.4016	65.9451	57.2291	45.0486	52.2104	27.4184	33.5621	24.2078	22.3942	29.9316	26.1163	50.7215	50.6081	58.4684	79.0842	56.3375	61.0332	26.9857	40.9023	37.8396	52.5039	51.9471	41.8921	44.1623	45.8174	36.0558	45.3291	41.3437	56.1697	27.0293	55.2277	42.8231	67.8619	61.165	46.169	34.9522	73.379	44.8768	48.4921
C07E3.3	C07E3.3	WBGene00007414	0	0	0	0	0	0	0	0	0	0	0	0	0	0	0	0	0	0	0	1.17145	0	0	0	0	0	0	0	0	0	0	0	0	0.615065	0	0	0	0	0	0	0	0	0	0	0	0	0	0
C07E3.4	C07E3.4	WBGene00007415	0	0	1.68133	0	0	0	0	0.326081	0	0.338864	0.291027	0	0	0	0.404826	1.43787	2.06337	2.2328	0.907378	3.11167	1.18386	0	0.408688	0	20.5586	3.10194	12.1206	4.45654	2.70558	7.53342	11.7596	10.0263	5.81717	2.98617	6.85929	1.26296	0.581258	3.18943	0	4.28905	2.18384	1.19594	0.772733	0	0	0	0
C07E3.5	ceh-57	WBGene00007416	0	0	0	0	0	0	0	0	0	0	0	0	0	0	0	0	0	0	0	0	0	0.907762	0	0	0	0	0	0	0	0	0	0	0	0	0	0	0	0	0	0	0	0	0	0	0	0	0
C07E3.6	ceh-58	WBGene00007417	37.8183	32.633	23.8306	55.2091	34.7646	42.9788	45.5725	32.4243	27.9276	22.2533	21.5764	56.6735	54.631	35.5433	19.2854	24.9096	26.2624	24.4117	24.9118	14.9797	32.127	30.7678	21.4121	62.445	12.2816	18.2252	22.8855	48.5438	33.2987	21.0224	10.8763	19.8979	23.6137	28.8486	21.0079	19.673	18.1363	30.8013	12.0272	39.1523	10.8428	13.4474	19.3973	60.8496	292.426	278.316	119.771
C07E3.8	C07E3.8	WBGene00007418	0	0	0	0	0	0	0	0	0	0	0	0	0	0	0.404826	0	0	0.418694	0	0.516505	0	0	0	0	0	0.839141	1.1864	0	0	2.99665	0	0	0.327975	0	0	0	0	0.405571	0	0	0.749543	0	0	0	0	0	0
C07E3.9	C07E3.9	WBGene00007419	3.43383	0	2.06191	0	4.1497	0	0.315135	1.43532	0.973335	0.338864	0.944973	3.12897	1.14649	0	2.02512	0.841967	1.26613	0.73911	0.383242	0.864842	0	0	0.470541	0.853508	3.37094	3.6552	4.57693	4.07387	1.77902	2.15763	2.84435	5.07779	3.11665	3.48626	3.93511	0.782161	4.81155	4.31535	5.52412	1.51342	0.749543	3.66348	2.16076	2.73708	5.80703	10.8656	1.68977
C07F11.1	tol-1	WBGene00006593	98.9622	117.903	92.9589	100.912	140.053	125.242	84.7587	28.6296	44.6722	20.0676	12.2261	49.7299	57.1926	12.1322	8.20449	10.8554	5.07572	9.70969	8.72015	9.15645	4.06432	3.48856	11.5384	67.6991	40.3542	31.4389	21.2897	25.2533	53.7877	34.4432	9.15801	45.4187	30.6768	42.9199	22.6097	22.1697	29.7012	55.1486	18.5424	16.1744	9.58181	22.2228	34.2832	59.6776	55.1767	170.668	23.3929
C07F11.2	C07F11.2	WBGene00015570	0	0	0	0	0	0	0	0	0	0	0.302753	0	0.460292	0	0	0	1.51863	0	0.530889	0.864842	0	0	0	0	0	0.419519	0.596023	0	0	0	0	0	0.279629	0.470654	0	0	0.657293	0	0	1.17179	0	0.472442	0	0.34911	0	0	0
C07G1.1	try-2	WBGene00006620	0	0	0	0	0	0	0	0	0.399934	0	0.291027	0	0.262177	0	0	0	0.487201	0	0.716656	0	0	0	0	0	0	0	0.643177	0	0	0	0	0.910325	0.332891	0	0	0.528259	0	0	2.50777	0	0	0.862175	0.626765	0	6.1901	0	0
C07G1.2	C07G1.2	WBGene00015571	0	0	0	0	0	0	0	0.909294	0.112359	0	0	0	0	0	0.587355	0.841967	0	0.368254	0	0	1.83462	0	0	0	0	0.888768	0	0	1.75289	0	0	0.511496	0	0.380654	0	0	0	0	1.12482	0	0	0.57736	0	0	0	3.03728	0
C07G1.3	pct-1	WBGene00003961	129.111	166.689	134.64	103.325	95.0701	132.078	111.294	69.4514	74.8947	51.3647	36.7824	75.8955	75.2286	19.6939	7.30487	16.8251	13.608	14.0073	11.4752	17.9736	34.5016	33.6667	29.1051	81.3406	17.5056	10.2696	15.1333	22.9844	4.91109	15.9248	23.5789	12.5239	12.0483	12.248	7.02214	11.0135	11.539	21.9562	52.3526	60.6487	9.44176	15.5335	44.4005	42.6478	33.8235	30.8629	54.2188
C07G1.4	wsp-1	WBGene00006957	110.221	135.272	97.6941	99.8754	115.417	103.999	60.2908	70.373	68.9787	63.9779	53.1473	79.0864	73.1545	38.9627	29.6281	36.9549	45.7813	38.1311	37.7451	41.7879	19.2878	37.613	43.6658	58.3319	21.8478	22.7265	22.5175	32.8601	31.323	42.9493	15.9475	23.459	21.2819	21.6462	19.404	29.446	29.6606	25.0065	17.0867	16.8306	29.9112	26.3289	54.575	67.1921	50.7792	62.6897	17.5508
C07G1.5	hgrs-1	WBGene00004101	106.423	89.0365	96.6573	54.3387	70.9458	84.4846	100.717	32.9693	35.436	40.0966	33.5896	66.4499	62.4375	13.3515	16.4749	18.169	15.3979	17.2151	24.848	10.3851	18.3699	29.6362	30.923	97.2242	17.1741	43.8733	31.2581	49.514	32.7585	36.1988	27.1452	36.9352	39.3365	38.8422	34.9271	44.3385	40.1155	55.4449	48.2735	42.1166	39.1803	40.24	75.4942	52.8073	100.057	51.5966	93.301
C07G1.6	C07G1.6	WBGene00015572	0	0	0	0	0	0	0	0	0	0	0	0	0	0	0	0	0	0	0	0	0	0	0	0	0	0	0	0	0	0	0	0	0	0	0	0	0	0	0	0	0.685921	0	0	0	0	0	0
C07G1.7	C07G1.7	WBGene00015573	0	0	0	0	0	0	0	0	0	0	0	0.39626	0	0	0	0	0	0	0	0	0	0	0	0	0	0	0	0	0	0	0	0	0	0	0	0	0	0	0	0	0.685921	0	0	0	0	0	0
C07G1.8	glrx-22	WBGene00044608	20.3607	9.80167	23.9292	6.74794	12.2752	6.26079	10.1925	56.5373	60.9914	47.9497	57.8347	46.1174	39.1301	66.8683	72.1779	87.3059	51.5638	66.2905	60.6676	45.4605	52.8308	74.1539	70.5984	29.5284	56.8883	44.9077	64.0547	43.8536	45.8401	73.3274	66.741	58.7204	66.768	49.4667	42.9723	54.3387	62.4298	47.7414	43.3907	47.1156	90.5345	63.8225	80.0435	37.8398	14.3882	36.8368	31.6436
C07G2.1	cpg-1	WBGene00000465	2777.14	2734.82	2834.72	1944.76	1987.91	2184.98	2228.48	466.779	517.517	573.42	607.497	1025	1684.87	32.7757	34.774	35.1767	28.5421	38.4963	36.5584	38.2563	60.4081	77.2424	155.889	1118.68	32.7309	12.8094	10.2583	10.2483	7.56507	7.15897	5.4154	8.4098	13.21	7.49811	19.4371	9.8997	23.9214	9.95331	7.74014	43.5352	19.7905	17.0986	222.294	559.965	0	0	1.68977
C07G2.2	atf-7	WBGene00000223	174.268	194.639	200.967	67.7621	97.5362	152.721	239.702	40.8478	41.3446	49.3496	35.2686	115.395	208.683	42.8205	41.7841	39.3946	45.8965	35.102	31.3967	30.2396	44.2575	39.7751	32.5638	308.355	42.7392	59.6666	58.3215	39.4484	47.6322	48.3381	59.8627	52.1553	36.4409	42.0357	48.8819	49.7215	35.6098	63.8158	38.6317	39.4785	25.3697	53.0504	81.8204	325.326	45.4475	54.6368	61.0301
C07G2.3	cct-5	WBGene00000380	465.517	540.625	552.567	516.65	470.517	634.061	508.498	332.704	313.288	372.085	356.444	320.06	267.031	370.486	349.998	306.223	352.484	346.087	325.436	432.437	420.587	449.329	373.506	328.895	278.971	276.538	296.156	257.643	336.015	333.377	278.748	288.687	318.034	326.5	344.126	322.869	395.807	341.356	382.249	403.762	399.252	375.273	311.015	270.767	205.41	174.684	241.865
C07G3.10	C07G3.10	WBGene00015578	0	0	0	0	0	0	0	0.143794	0	0	0.257424	0	0	0	0	0	0	0	0	0	0	0	0	0.557906	1.51999	0	0	0	0	0	0	0	0.223847	0	0	0.868012	0	0	0	0	0	0	0	0	0	2.07602	0
C07G3.2	irg-1	WBGene00015574	0	0	0	0	0	0	0	0	0	0	0.51491	0	0.460292	0	1.21284	0	0	0	0	1.17145	0	0	0.470541	0	0	1.0783	0	0	0	0	0	0	0	0	0.247903	0	1.0003	0	1.72939	0	3.59682	1.02954	1.69742	4.235	0	0	0
C07G3.3	str-227	WBGene00006258	0	0	0	0	0	0	0	0.10173	0	1.24701	0.431615	0	0	0	0	0	0	0.202301	0	0	0	0	0	0	0	0	0.596023	0	0	0	0	0	0	0.280663	0	0	1.47085	0	1.16704	1.17179	0	0.945	0	0.34911	6.1901	0	0
C07G3.4	str-226	WBGene00006257	0	0	0	0	0	0	0	0	0	0	0	0	0	0	0	0	0	0	0	0	0	0	0	0	0	0	0	0	0	0	0	0	0	0	0	0	0	0	0	0	0	0	0	0	0	0	0
C07G3.5	str-228	WBGene00006259	0	0	0	0	0	0	0	0	0	0	0	0	0	0	0	0	0	0	0	0	0	0	0	0	0	0	0	0	0	0	0	0	0.327975	0	0	0	0	0	0	0	0	0	0	0	0	0	0
C07G3.6	str-225	WBGene00006256	0	0	0	0	0	0	0	0.136293	0	0	0	0	0	0	0	0	0	0	0.426117	0	0	0	0	0	0	0	1.28253	0	0	0	0	0	0.223847	0	0	0	0.228094	0	0	0	0	0	0	0	0	0	0
C07G3.8	C07G3.8	WBGene00015576	0	0	0	0	0	0	0	0	0	0	0.291027	0	0	0	0.533593	1.68414	0	0.570555	0.235491	1.50121	2.10106	2.02599	0	0	0	0	0	0	0	0	0	0	0.327975	0	0	1.33206	0	1.06288	4.04174	2.84821	0	0	0.626765	0	0	0	0
C07G3.9	ugt-64	WBGene00015577	11.9898	3.45157	5.42793	6.09729	5.35909	0.468274	13.6778	3.34722	4.38522	2.07528	1.63552	6.07912	8.86387	0.91434	7.56498	9.27372	3.70267	9.12948	9.55404	0.502594	7.2122	4.27281	1.16	9.02096	4.89093	4.73025	4.56426	6.26322	3.10551	3.06866	6.72546	2.44119	4.5414	5.13599	6.41474	6.41634	5.69366	15.0582	35.571	28.2395	1.37712	1.93874	3.22051	15.2835	0	4.53332	9.64307
C07H4.1	C07H4.1	WBGene00007421	0	0	0	0	0	0	0	0	0	0	0	0	0	0	0	0	0	0	0	0	0	0	0	0	0	0	0	0	0	0	0	0	0	0	0	0	0	0	0	0	0	0	0	0	0	0	0
C07H4.2	clh-5	WBGene00000532	44.8594	64.4059	39.5293	56.7653	46.4547	45.2587	33.4806	19.8749	22.6982	32.9002	22.4936	36.4317	48.6673	17.7005	7.54872	13.4045	11.3224	13.9202	9.88793	14.1228	11.0243	12.1628	21.2289	38.2934	4.56109	27.746	22.3435	33.896	14.9148	19.078	13.2367	12.5884	18.2755	20.4241	12.6767	21.7433	16.6989	28.1988	28.2709	27.6287	11.4957	16.8662	31.0968	32.5657	61.8536	75.8226	30.495
C07H6.1	lig-4	WBGene00002986	6.8685	12.7249	15.6294	12.7843	12.4276	16.846	20.006	15.9467	17.3322	16.756	12.7405	16.313	31.8818	12.1121	10.0146	15.188	21.6643	15.179	9.31647	14.0372	5.89054	0.907762	6.4405	20.6424	10.7612	13.3803	7.91696	2.14126	8.67537	10.2071	5.8744	7.63928	10.3561	9.91055	7.34604	7.31415	5.66017	0	2.85448	1.17179	0.749543	1.34205	11.6501	10.1268	0	4.53332	1.68977
C07H6.2	C07H6.2	WBGene00015579	103.381	116.353	155.33	66.3182	91.4885	131.382	88.507	62.5061	66.2969	81.8303	62.4755	119.573	90.5973	18.9224	22.2022	31.5064	24.9274	27.7835	14.859	31.2081	6.02805	24.1586	53.6984	99.6028	11.3038	8.49801	8.94496	9.78857	11.4987	21.9753	10.4923	16.1224	12.8827	12.9951	12.4375	16.1839	14.7957	17.079	8.13522	16.933	9.25871	14.7488	85.8997	104.314	20.5798	44.8978	27.1825
C07H6.3	cls-1	WBGene00015580	0	4.04669	3.74324	6.09729	1.20939	2.74229	6.08676	2.19432	3.89659	2.10268	1.63401	1.54596	2.6522	1.75791	1.6107	2.92617	4.01244	5.71384	2.46688	2.70718	0.9172	6.6452	1.40492	1.79621	0	0.764779	0.798415	2.05532	0	1.60624	0	3.95221	1.11361	3.3039	0.931351	0.89377	2.48112	0.526187	1.16704	2.34387	0.902559	1.90624	1.01232	4.84736	0	0	0
C07H6.4	C07H6.4	WBGene00015581	41.1113	90.8064	73.0915	81.063	107.67	72.0396	85.9858	134.689	141.076	193.514	140.058	88.5901	85.8577	188.514	198.21	170.043	222.957	205.665	220.978	232.857	171.149	172.324	153.99	155.476	148.291	141.798	112.357	139.008	138.322	168.554	124.155	120.569	153.725	155.612	149.08	159.675	148.132	105.999	104.19	75.9875	126.784	117.306	95.0712	81.1829	108.642	61.7859	111.099
C07H6.5	cgh-1	WBGene00000479	19.0002	9.31111	16.7948	14.8057	23.154	31.6715	23.2675	44.8055	46.0557	30.7452	32.527	49.9248	76.9132	28.2625	24.5209	34.2734	26.0954	39.9301	29.0881	22.6439	9.17642	18.2565	40.1965	194.58	10.4314	17.7277	8.31127	9.02599	15.8053	10.8525	7.01926	13.6849	7.93815	11.4382	6.47094	14.4366	20.4349	9.9238	10.3327	13.6928	10.6729	8.20492	44.2841	157.895	11.9971	36.2445	12.1909
C07H6.6	clk-2	WBGene00000537	18.3224	5.5544	22.0961	12.032	7.06795	17.9564	37.8636	4.93861	2.97673	4.35244	3.95327	13.4389	66.8275	1.70174	2.77171	3.42213	2.00595	5.27945	1.46428	2.36245	9.71006	0	4.39872	60.2397	5.97514	7.79554	9.52615	2.82759	9.34409	3.90809	2.46059	12.5752	10.6409	5.56665	6.7863	6.89573	15.0056	14.6616	6.14838	2.81985	8.43122	7.13835	17.7181	51.179	5.80703	16.9424	10.7807
C07H6.7	lin-39	WBGene00003024	11.9898	16.9989	14.9782	16.3197	16.0246	24.6949	17.1875	5.57959	5.34983	3.89677	5.25825	5.24747	3.61742	4.24743	2.54606	4.70803	3.98385	2.57981	3.62195	3.03118	1.96303	8.22719	4.60748	5.01148	6.30572	1.1843	0	0	0	4.02982	0	4.94745	0.557741	1.19299	1.67845	0.868012	2.04725	0	0.68814	12.4085	2.27143	3.0052	1.30156	1.7464	0	0	0
C07H6.8	cux-7	WBGene00000854	37.0822	31.6373	39.8883	18.4328	36.6109	41.4856	19.7662	28.3404	27.5288	30.0214	29.4006	28.7829	26.6516	12.4927	18.2421	19.7026	8.60709	21.6276	12.8078	8.62731	8.39664	19.8898	16.1607	29.786	6.7427	15.307	8.8098	3.86568	4.4846	8.74177	10.6561	20.9758	9.17028	8.69939	8.38593	10.7614	11.0368	6.94217	5.23725	6.61428	15.1177	12.6342	13.8781	31.4662	26.3868	22.8702	7.33646
C07H6.9	C07H6.9	WBGene00015582	0	1.50734	0	0.263717	2.0746	0.234108	0	0.535109	0.306294	0.271359	0.653946	0.39626	0	0	0.682146	0.74606	0	0	0	0	1.04583	0	1.56075	0	1.51999	0	0	0	1.35263	0	1.8028	2.93762	0.781008	0	1.34992	0.528259	0	0	0.68814	4.86684	0.749543	0	0.337356	0	0	10.3897	2.28599
C08A9.1	sod-3	WBGene00004932	0	0	0	0	0	0	0	0.375021	0	0.338864	0.734368	0.376627	0	3.5158	0.587355	0	0	0	0.618733	0	0	0.907762	0.865959	0	7.39028	0	1.34164	0	0	0	0	0	0	1.65884	1.01397	0.819649	0	1.62288	1.16704	6.9143	4.43314	0	1.88075	1.82039	0	0	0
C08A9.10	C08A9.10	WBGene00044773	0	0	0	0	0	0	0	1.0768	0.182698	1.97814	0.817663	0	0	2.6163	0.80975	0.841967	0.974521	0.811787	0.245617	0	1.04583	0	0.865959	0	0	0.764779	0	0	0	2.53112	0	0	0.944739	0	0.413695	0.460697	0	0	0	0	0	0.313154	0	0	0	0	0
C08A9.3	C08A9.3	WBGene00015583	0	0	0	0	0	0	0	0	0.192642	0	0	0	0	0	0	0	0	0.418694	0	1.17145	1.04583	2.02599	0	0	2.93478	0	0	0	0	0	0	0	0	0	1.1781	0	0	0	1.72939	1.63971	0	0	0	0	0	0	0
C08A9.6	C08A9.6	WBGene00015586	27.4941	42.4673	34.0231	48.3811	18.135	26.1236	29.9244	33.5661	28.3304	18.4824	21.4302	15.7373	6.3299	16.2521	20.6366	23.879	15.3038	18.7161	13.9721	23.2669	16.9185	18.8716	10.8408	1.96946	5.97514	25.9208	25.3057	26.2883	21.9172	8.76601	36.6322	14.925	17.432	25.3295	20.3844	22.9304	23.0394	55.0347	23.7484	31.7683	25.7584	27.5908	3.59793	5.33217	52.3983	71.889	53.6451
C08A9.7	sdz-2	WBGene00015587	0	1.12418	1.80887	0	0	0	0	6.00333	7.89421	2.77337	6.17353	1.6347	0	13.5647	26.1451	22.2974	17.1336	27.0123	29.841	23.4256	22.0444	13.83	1.28802	3.04202	34.3577	46.0952	78.0733	69.9102	51.7176	47.3547	46.432	57.4427	56.0712	51.9031	72.9573	54.1486	41.4685	135.561	25.6591	41.212	12.302	25.2855	1.30156	7.7033	8.19806	30.3764	45.8817
C08A9.8	C08A9.8	WBGene00015588	0	0	0	0	0	0	0	0.204634	0.529216	1.838	0.653946	0	0	0	0	0	0.974551	1.89774	1.4327	1.97983	0	0	0	0	0	1.1843	0.596023	0	0	0.839022	0	0	1.34752	0.468985	1.13593	1.53363	0.904147	1.51704	0	0	0	0.583512	0	0	0	0	0
C08A9.9	C08A9.9	WBGene00015589	0	0	0	0	0	0	0	0	0.369073	0	0.621781	0	0	0	0	0	0	0	0	0.516505	0	0	0	0	0	0	0	0	0	1.14071	0	0	0	0	0	0	0.357222	0	0	0	0.749543	0.785596	0	0	0	0	0
C08B11.1	zyg-11	WBGene00006996	245.91	289.364	236.825	186.622	219.404	287.091	317.28	45.0221	50.5868	97.956	72.7501	175.722	216.404	14.8426	12.2747	14.0004	7.43177	15.3938	15.3236	16.5852	16.1501	16.5606	73.8973	361.027	17.8256	18.77	25.1557	32.8248	18.6294	21.2733	25.4452	23.8506	23.1029	24.046	20.8494	28.4474	17.8177	28.4866	20.8025	22.8892	13.4238	27.6279	127.819	220.451	18.1888	27.1853	31.3833
C08B11.2	hda-2	WBGene00001835	40.7713	23.13	33.2261	57.9581	23.154	38.5846	32.8319	49.2422	56.2342	51.7897	43.6411	71.7539	64.1957	28.5895	45.745	37.9144	55.1463	33.9242	44.1557	38.393	32.8405	29.8844	43.9985	94.9221	30.7659	22.9603	40.4913	26.7214	57.1486	40.8219	30.5104	26.8569	38.8868	23.6998	27.8234	28.7003	29.5727	17.9538	22.3798	5.97446	28.0208	15.0576	40.0806	69.1311	20.5798	55.2187	39.5876
C08B11.3	swsn-7	WBGene00007433	113.297	196.273	161.475	162.559	204.469	188.542	135.901	291.245	325.413	292.086	277.202	208.108	155.06	446.576	422.278	463.503	487.624	466.446	467.74	424.201	344.536	388.36	334.818	159.383	485.955	515.995	363.9	443.708	380.898	468.55	396.091	442.991	482.944	468.304	445.395	435.172	424.139	363.964	369.552	374.14	362.058	377.758	285.753	153.886	422.85	358.008	458.749
C08B11.4	nrf-6	WBGene00003813	0	1.94423	0	0	1.20939	0	3.82249	1.63812	1.04914	0	0.721203	0.881358	0.262177	0	0.341031	1.58803	1.00285	1.43591	1.01219	2.02466	0	0.783866	0.579929	3.04202	0	0.419519	0.643177	1.11373	0	0	0	1.63988	0.557161	0.937443	0.194083	0.391033	1.0178	0.405571	0.68814	4.15441	0	0	0.626765	0	0	5.1133	0
C08B11.5	sap-49	WBGene00004723	124.981	105.102	127.485	116.25	126.217	100.976	74.9118	161.336	153.79	173.301	160.189	118.895	94.5397	148.62	126.047	146.219	184.193	151.392	159.667	109.326	59.8301	85.149	115.003	68.6119	75.4154	92.1291	89.2299	92.279	84.2696	108.787	86.8893	95.622	96.2945	90.7427	64.5701	87.2935	98.1575	62.3651	76.2181	61.3201	67.7111	96.4444	93.8288	79.0065	87.7822	61.4684	58.9064
C08B11.6	arp-6	WBGene00007434	18.3224	7.8965	9.05038	36.9518	19.1532	21.4123	13.3102	97.289	88.7211	84.2256	85.9896	82.7148	63.7881	113.599	90.3922	107.573	93.0424	103.949	96.0107	91.9639	84.6972	79.5661	94.3288	57.0119	95.1228	48.4713	52.3913	52.3455	60.3797	68.0539	76.7229	51.7465	61.7818	57.0471	52.0121	45.6456	78.0439	43.2561	37.5729	26.5734	78.1981	54.2678	63.7882	62.1795	17.4254	56.2969	38.7243
C08B11.7	ubh-4	WBGene00006724	59.1836	24.7533	53.1577	43.3212	57.3055	37.4917	32.9531	14.2929	12.2804	27.0322	33.13	40.2543	59.1722	9.32577	13.8277	8.68396	10.0656	8.83722	12.8084	21.4082	16.394	20.3029	38.6153	79.833	35.4441	35.804	31.5729	38.3806	30.8699	32.4146	29.0727	31.1821	31.9189	35.9776	27.3911	30.6281	32.0734	64.3741	26.721	40.0222	29.5466	27.0918	66.927	90.1838	54.0269	84.6223	82.1731
C08B11.8	C08B11.8	WBGene00007435	33.0571	44.624	26.6019	16.0013	12.9279	27.5135	64.5233	12.2074	13.669	18.7923	19.3282	21.5479	23.1336	5.40112	2.55921	3.43068	3.12617	8.21095	1.83304	2.5528	2.75227	5.71672	8.06945	33.3803	3.04036	3.47976	4.30907	5.09185	3.10551	2.11017	2.57042	0.910325	2.10345	3.5	3.70255	4.13855	4.22921	8.59763	3.54262	3.93681	9.17375	6.34297	23.5644	35.7404	0	14.9185	4.54623
C08B11.9	C08B11.9	WBGene00007436	47.1625	38.4874	50.5795	55.3389	43.1647	49.8363	25.413	68.7939	69.6828	79.9795	60.4551	60.0831	43.923	66.6012	56.2265	55.9151	62.0664	66.1127	67.1607	57.5194	89.4788	90.298	59.6371	22.5131	77.2564	62.0864	54.7037	56.0326	72.4059	84.4401	73.3351	62.3838	52.3959	66.1136	65.4864	62.8998	64.0704	48.85	61.8671	55.5321	53.2325	58.3719	52.4227	37.9594	101.641	127.73	86.9658
C08B6.1	ugt-17	WBGene00007422	0	0	0	0	0	0	0	0	0	0	0	0	0	0	0	0	0	0	0	0	0	0	0	0	0	0	0	0	0	0	0	0	0	0	0	0	0	0	0	0	0	0	0	0	0	0	0
C08B6.10	C08B6.10	WBGene00007430	6.10298	13.937	15.0032	7.56397	10.8742	5.56549	7.64592	0.857627	1.05898	2.98127	1.16137	0.376627	0.262177	0	0	0.595905	0.974551	0	0.245617	1.17145	10.0857	3.31195	0.28603	0	2.93478	0	0	1.02754	1.35263	2.2817	0	0	0.22485	0	0	0.460697	0.333352	0.405571	0.568984	3.59518	0.300779	0.706649	0	0	8.19806	5.1133	0
C08B6.11	C08B6.11	WBGene00007431	0	0	0	0	0	0	0	0	0	0	0	0	0	0	0	0	0	0	0	1.17145	0	0	0	0	0	0	0	0	0	0	0	0	0	0	0	0	0	0	0	0	0	0	0	0	0	0	0
C08B6.12	srxa-18	WBGene00007432	0	0	0	0	0	0	0	0	0	1.97814	0	0	0.262177	0.843547	0.533593	0.74606	0.974551	0	0.295398	1.67404	0	0	1.06896	0	0	0	0	0	0	0	1.28505	0	0	0.780065	0.194083	0	1.46273	0	1.85518	0.819757	0.300779	0	0.626765	0	0	0	0
C08B6.13	srxa-19	WBGene00044012	0	0	0	0	0	0	0	0	0	0.271359	0	0	0	0.91434	0	0.595905	0	0	0	1.17145	1.04583	0	0.572129	0	0	0	0	0	0	1.14071	0	0	0	0.280663	0.194083	0	3.21546	0	0	0.819757	0	0.319305	0	0	0	0	0
C08B6.14	C08B6.14	WBGene00044044	0	0	0	0	0	0	0	0	0	0	0	0	0	0	0	0	0	0	0	0	0	0	0	0	0	0	0	0	0	0	0	0	0	0	0	0	0	0	0	0	0	0	0	0	0	0	0
C08B6.2	C08B6.2	WBGene00007423	0	0	0	0	0	0	0	0	0	0	0	0	0	0	0	0	0	0	0	0	0	0	0	0	0	0	0	0	0	0	0	0	0	0	0	0	0	0	0	0	0	0	0	0	0	0	0
C08B6.3	C08B6.3	WBGene00007424	0	0	0	0	0	0	0	0	0	0	0	0	0	0	0	0	0	0	0	1.17145	0	0	0	0	0	0	0	0	0	0	0	0	0	0	0	0	0	0	0	0	0	0	0	0	0	0	1.39494
C08B6.4	C08B6.4	WBGene00007425	0	0	0	0	0	0	0	0.652242	0	0.271359	0.689038	0.485098	0	0	0	0	0	0	0	0	0	0	0	0	0	0	0	0	0	0	0	0	0	0	0	0	0	0	0	0	0	0	0	0	0	0	0
C08B6.5	C08B6.5	WBGene00007426	0	0	0	0	0	0	0	0	0	0	0	0	0	0	0	0	0	0	0	0	0	0	0	0	0	0	0	0	0	0	0	0	0	0	0	0	0	0	0	0	0	0	0	0	0	0	0
C08B6.6	C08B6.6	WBGene00007427	0	0	0	0	0	0	0	0	0	0	0	0	0	0	0	0	0	0	0	1.17145	0	0	0	0	0	0	0	0	0	0	0	0	0	0	0	0	0	0	0	0	0	0	0	0	0	0	0
C08B6.7	hpo-22	WBGene00007428	124.149	117.573	116.076	151.781	83.0227	120.606	151.618	149.443	152.07	123.811	93.5016	83.2322	86.6203	75.8937	69.9407	86.9382	100.035	99.3672	89.1469	67.3442	48.0351	46.1864	83.0853	93.7395	23.8066	28.4294	15.6605	8.70401	6.66398	4.46367	33.5626	11.105	16.0201	11.8299	13.2014	11.2909	17.715	20.06	18.5385	19.9919	22.6436	27.2329	81.4955	61.5482	58.2096	39.0643	52.3961
C08B6.8	C08B6.8	WBGene00007429	20.3607	10.6344	22.4771	39.0116	31.5888	15.2767	11.4585	63.7291	59.8276	57.8982	61.7404	52.1957	46.9773	55.3725	78.3039	69.7835	57.9253	62.1725	46.8463	46.6178	48.6247	38.673	71.9814	38.8325	58.4118	55.6108	48.3787	47.6802	32.5468	57.1502	59.1313	45.2056	49.8423	50.2969	39.4091	32.041	63.8453	47.4171	53.3286	37.8146	69.529	44.4163	54.0927	48.1821	48.5974	62.9732	51.3499
C08B6.9	aos-1	WBGene00000142	65.3866	83.0736	56.8005	97.1876	59.2761	94.2903	38.8951	163.488	169.395	127.302	149.449	99.0057	91.8226	104.905	110.393	121.338	127.502	128.067	115.788	82.7441	67.9621	65.5897	93.5725	56.9728	45.5657	39.238	43.0757	30.8244	30.6923	55.2473	55.6843	46.1227	48.5415	38.3614	39.1423	41.3341	51.636	28.8712	39.1823	36.9795	49.1423	33.4109	55.1241	65.9451	24.3819	54.2163	33.0884
C08C3.1	egl-5	WBGene00001174	0	0	0	0	0	0	0	0.16076	0	0.271359	0	0	0	0	0	0	0	0	0	0	0	0	0	0	4.89093	1.0783	0	0	1.75289	0	0	0	1.60822	0	0	0	0	0	0	0	0	0	0	0	0	0	0
C08C3.2	bath-15	WBGene00015590	30.5597	19.7909	16.6672	17.0312	5.35909	17.2378	11.1419	30.8469	28.6113	25.6654	27.3902	16.2815	18.2379	3.57221	4.66979	5.85686	8.72408	13.8308	3.53745	3.34849	2.36801	5.61383	13.822	18.7679	4.56109	2.66696	1.05571	2.82759	0	0.839022	0.90129	4.12918	1.84826	4.08631	0.991472	1.37075	1.11354	3.04484	4.65927	4.45957	0	1.57384	8.20873	16.8163	6.1901	0	6.236
C08C3.3	mab-5	WBGene00003102	0	0	0	2.62062	0	0	0	0.291859	0.192642	0	0.302753	0	0	0	0	0	0.487201	0.519689	0	0.492291	0	1.92063	0	0	0	0	0	0	1.77902	0	0	2.44119	0.332311	0	0.247903	0	0.228094	0.405571	7.89894	4.92872	0	0	0	0.34911	0	0	5.35755
C08C3.4	cyk-7	WBGene00015591	168.445	100.33	104.135	193.675	217.973	162.055	163.951	80.8309	78.0309	106.647	89.4444	147.352	199.726	15.1692	14.8703	14.787	11.9377	13.8816	11.6297	24.8012	24.0273	26.1078	40.3775	209.764	17.6112	9.32395	18.4014	8.24603	25.13	17.6321	19.49	15.7589	12.7636	12.6759	11.4083	18.0241	18.0681	9.80864	8.27324	18.9142	17.7488	20.5544	109.133	181.423	5.80703	13.106	3.97575
C08D8.1	C08D8.1	WBGene00015592	0	0	0	0	0	0	0	0	0	0	0	0	0	0	0	0	0	0	0	0	0	0	0	0	0	0	0	0	0	0	0	0	0	0	0	0	0.561446	0	0	0	0	0.862175	0	0	0	0	0
C08D8.2	tmd-2	WBGene00006582	0	0	0	0	0	0	0	0	0	0	0	0	0	0	0	0	0	0.404651	0	0	0	0	0.470541	0	0	0	0	2.07594	0	0.839022	0	0	0	0	0.495867	2.24846	0	0	0	0	0	0.313154	0.626765	0	0	0	0
C08E3.1	C08E3.1	WBGene00015593	0	0	0	0	0	0	0	0	0	0	0	0	0	0	0	0	0	0	0	0.492291	0	0	0	0	0	0	0	0	0	1.39041	0	0	0	0	0.722232	0	0	0	0	0	0	0	0	0	0	0	0
C08E3.10	fbxa-158	WBGene00015602	0	0	0	0	0	0	0	0	0	0	0	0	0	0	0	0	0	0	0	0	0	0	0	0	0	0	0	0	0	0	0	0	0	0	0	0	0	0	0	0	0	0	0	0	0	0	0
C08E3.11	fbxa-159	WBGene00015603	0	0	0	0	0	0	0	0	0	0	0	0	0	0	0	0	0	0	0	0.864842	0	0	0	0	0	0	0	0	0	0	0	0	0	0	0	0	0	0	0	0	0	0	0	0	0	0	0
C08E3.12	fbxa-160	WBGene00015604	0	0	0	0	0	0	0	0	0	0	0	0	0	0	0	0	0	0	0	0	0	0	0	0	0	0	0	0	0	0	0	0	0	0	0	0	0	0	0	0	0	0	0	0	0	0	0
C08E3.13	C08E3.13	WBGene00015605	0	0	0	0	0	0	0	0	0	0	0	0	0	0	0	0	0	0	0	0	0	0	0	0	0	0	0	0	0	0	0	0	0	0	0	0	0	0	0	0	0	0	0	0	0	0	0
C08E3.14	C08E3.14	WBGene00044415	0	0	0	0	0	0	0	0	0	0	0	0	0	0	0	0	0	0	0	0	0	0	0	0	0	0	0	0	0	0	0	0	0	0	0	0.476979	0	0	0	0	0	0	0	0	0	0	0
C08E3.15	C08E3.15	WBGene00044416	0	0	0	0	0	0	0	0	0	0	0.364358	0	0	0	0	0	0	0	0	0	0	0	0	0	0	0	0	0	0	0	0	0	0.665864	0	0	0.528259	0	0	0	0	0	0.319305	0	0	0	0	0
C08E3.2	btb-15	WBGene00015594	0	0	0	0	0	0	0	1.51501	1.29796	0	0.302753	0	0	0	0	0	1.63584	0.607051	0	0	2.36801	0	0	0	0	0	0	0	0	0	0	0	0.332311	0	1.06156	1.18669	0	0	1.81296	0	2.87675	0	0	0	0	0	0
C08E3.3	bath-33	WBGene00015595	0	0	0	0	0	0	0	6.3408	5.90242	3.43807	4.51196	0	0	7.76427	18.564	23.831	9.5193	14.6528	19.6134	21.7151	14.1589	8.28039	1.43823	0	55.8158	32.7235	23.7131	15.7791	37.888	29.9629	30.5065	20.539	25.0352	34.8855	24.588	19.5066	29.8524	32.4063	14.5459	8.21266	11.8176	21.1438	0.626765	0.34911	0	0	0
C08E3.4	fbxa-161	WBGene00015596	0	0	0	0	0	0	0	0	0	0	0	0	0	0	0	0	0	0	0	0	0	0	0	0	0	0	0	0	0	0	0	0	0	0	0	0	0	0	0	0	0	0	0	0	0	0	0
C08E3.5	fbxa-162	WBGene00015597	0	0	0	0	0	0	0	0	0	0	0	0	0	0	0	0	0	0	0	0	0	0	0	0	0	0	0	0	0	0	0	0	0	0	0	0	0	0	0	0	0	0	0	0	0	0	0
C08E3.6	fbxa-163	WBGene00015598	0	0	0	0	0	0	0	0	0	0	0	0	0	0	0	0	0.487201	0	0.383242	0	9.16083	1.56792	0	0	0	0	0	0	0	0	0	0	0.223847	0	0.492828	0.443315	0	0	26.6231	7.04926	0	0	0	0.34911	0	0	0
C08E3.7	fbxa-164	WBGene00015599	0	0	0	0	0	0	0	0	0	0	0	0	0	0	0	0	0	0	0	0	0	0	0	0	0	0	0	0	0	0	0	0	0	0	0	0	0	0	0	0	0	0	0	0	0	0	0
C08E3.8	fbxa-165	WBGene00015600	0	0	0	0	0	0	0	0	0	0	0	0	0	0	0	0	0	0	0	0	0	0	0	0	0	0	0	0	0	0	0	0	0	0	0	0	0	0	0	0	0	0	0	0	0	0	0
C08E3.9	fbxa-166	WBGene00015601	0	0	0	0	0	0	0	0	0	0	0	0	0	0	0	0	0	0	0	0	0	0	0	0	0	0	0	0	0	0	0	0	0.223847	0	0	0	0	0	0	0	0	0	0	0	0	0	0
C08E8.1	C08E8.1	WBGene00007437	0	0	0	0	0	0	0	0	0	0	0	0	0	0	0	0	0	0	0	0	0	0	0	0	0	0	0	0	0	0	0	0	0	0	0	0	0	0	0	0	0	0	0	0	0	0	0
C08E8.10	C08E8.10	WBGene00077692	0	0	0	0	0	0	0	0	0	0	0	0	0	0	0	0	0	0	0	0	0	0	0	0	0	0	0	0	0	0	0	0	0	0	0	0	0	0	0	0	0	0	0	0	0	0	0
C08E8.11	C08E8.11	WBGene00119201	0	0	0	0	0	0	0	0	0	0	0	0	0	0	0	0	0	0	0	0	0	0	0	0	0	0	0	0	0	0	0	0	0	0	0	0	0	0	0	0	0	0	0	0	0	0	0
C08E8.2	C08E8.2	WBGene00007438	0	0	0	0	0	0	0	0	0	0	0	0	0	0	0	0	0	0	0	0	0	0	0	0	0	0	0	0	0	0	0	0	0	0	0	0	0	0	0	0	0	0	0	0	0	0	0
C08E8.3	C08E8.3	WBGene00007439	0	0	0	0	0	0	0	0	0	0	0	0	0	0	0	0	0	0.209321	0	0	0	0	0	0	0	0.888768	0	0	0	0	0	0	0	0	0	0	0.540871	0.81124	0.568984	0	0	0	0	0	0	0	0
C08E8.4	C08E8.4	WBGene00007440	0	0	0	0	0	0	0	0	0	0	0	0	0	0	0.404826	0	0	0	0	0	0	0	0	0	0	0	0	0	0	0	0	0	0	0	0	0	0	0	0	0	0	0	0	0	0	0	0
C08E8.5	C08E8.5	WBGene00007441	0	0	0	0	0	0	0	0	0	0	0	0	0	0	0	0	0	0	0	0	0	0	0	0	0	0	0	0	0	0	0	0	0	0	0	0	0	0	0	0	0	0	0	0	0	0	0
C08E8.6	C08E8.6	WBGene00007442	0	0	0	0	0	0	0	0	0	0	0	0	0	0	0	0	0	0	0	0	0	0	0	0	0	0	0	0	0	0	0	0	0	0	0	0	0	0	0	0	0	0	0	0	0	0	0
C08E8.9	C08E8.9	WBGene00050891	0	0	0	0	0	0	0	0	0	0	0	0	0	0	0	0	0	0	0	0	0	0	0	0	0	0	0	0	0	0	0	0	0	0	0	0	0	0	0	0	0	0	0	0	0	0	0
C08F1.1	math-2	WBGene00015606	0	0	0	0	0	0	0	0	0.123789	0	0	0	0	0	0	0.595905	0	0	0.383242	0	0	0	0	0	0	0.419519	0	0	1.35263	0	0	0	0	0	0	0	0	0	0	0	0	1.46242	0	0	0	0	0
C08F1.10	C08F1.10	WBGene00015613	0	0	0	0	0	0	0	2.56958	5.36296	2.22335	3.44558	0	0.262177	30.1181	30.6807	28.8618	28.4957	9.99097	15.7496	20.5812	43.0952	17.4543	1.40246	0.557906	39.4802	82.5166	20.1192	24.5913	38.8915	34.8543	52.0089	66.4179	19.8832	17.7595	19.5447	17.9766	24.1299	51.5375	35.3175	29.8758	47.2176	50.1249	3.26057	11.3395	98.1075	128.609	178.71
C08F1.11	C08F1.11	WBGene00044417	0	0	0	0	0	0	0	0.701539	0.797498	1.255	1.12076	0	0	3.75581	3.78761	3.37236	2.15162	1.05396	0.566331	4.87392	4.06432	1.56792	1.44603	0	0	10.5309	1.28651	7.97733	9.7218	0	7.2182	5.45229	5.5479	4.1597	2.40819	5.44974	5.86512	5.72022	1.12482	0	3.17206	5.04912	0.761264	0	11.9971	2.07602	4.54623
C08F1.3	fbxb-13	WBGene00015607	0	0	0	0	0	0	0	4.89273	5.86833	1.48185	2.70668	0	0	27.2893	36.9916	44.5409	19.3524	45.084	56.6381	36.0955	26.3933	32.9606	3.18453	1.88563	76.5595	97.5375	142.417	147.041	136.949	94.4331	80.1719	86.0427	91.333	81.6177	101.38	96.9705	83.0327	107.372	43.0331	41.724	30.1161	37.75	7.44114	7.67492	62.9946	70.3464	55.4418
C08F1.4	math-3	WBGene00015608	0	0	0	0	0	0	0	0	0	0	0.364358	0	0	0.970518	0	0	0	0	0.235491	0	0	0	0	0	2.93478	0	1.59702	2.22773	0	0	0	0	0	0.234464	0.726952	0	0	0	0.568984	0	0	0.862175	0	0.698306	0	0	0
C08F1.5	math-4	WBGene00015609	0	0	0	0	0	0	0	0	0	0	0	0	0	0	0	0	0	0	0.33084	0	0	0	0	0	0	0	0	1.02754	0	0	0	0	0	0	0.347808	0	0	0	0	0	0	2.29717	0	0	0	0	0
C08F1.6	C08F1.6	WBGene00015610	0	0	0	2.62062	0	0	0	17.9711	19.8653	6.8348	6.06429	2.31923	0.262177	61.4695	64.9732	77.5823	42.7988	61.7094	74.8603	81.0983	59.7692	52.8704	3.47606	2.52763	231.164	249.569	254.234	237.227	311.539	244.088	174.988	189.111	180.075	172.182	197.641	215.791	166.785	208.53	85.035	130.55	98.7595	98.7167	9.39346	21.8125	127.444	141.708	151.436
C08F1.8	C08F1.8	WBGene00015611	0	0	0	0	0	0	0	3.50547	3.27353	2.94067	2.39296	1.88406	0.262177	4.54291	4.46724	2.47615	6.33727	10.6593	13.9235	6.14248	2.36801	4.98537	0.579929	0.557906	5.97514	9.39557	15.7671	16.5531	20.8213	13.2448	14.139	16.395	13.7098	7.37457	9.25644	13.3926	21.5036	10.3289	0.562342	2.42339	1.86215	2.22233	0	0.593779	19.8135	2.07602	5.07054
C08F11.1	C08F11.1	WBGene00007450	0	0	0	0	0	0	0	0	0	0	0	0	0	0	0	0	0	0	0	0	0	0	0	0	0	0	0	0	0	0	0	0	0	0	0	0	0	0	0	0	0	0	0	0	0	0	0
C08F11.10	C08F11.10	WBGene00007457	0	0	0	0	0	0	0	0	0	0	0	0	0	0	0	0	0	0	0	0	1.18386	0	0	0	0	0	0	0	10.5237	0	0	0	0	0	0	0	0	0	0	0	0	0	0	0	0	0	0
C08F11.11	C08F11.11	WBGene00007458	0	0	0	0	0	0	0	0	0	0	0	0	0	0	0	0	0	0	0	0	0	0	0	0	0	0	0	0	0	0	0	0	0	0	0	0	0	0	0	0	0	0	0	0	0	0	0
C08F11.12	C08F11.12	WBGene00007459	0	0	0	0	0	0	0	0	0	0	0	0	0	0	0	0	0	0	0	0	0.9172	2.02599	0	0	0	0	0	0	0	0	0	0	0	0	0	0	0	0	0	0	0.811831	0	0	0	0	0	0
C08F11.13	C08F11.13	WBGene00007460	0	0	0	0	0	0	0	0	0	0	0	0	0	0	0	0	0	0	0	0	0	0	0	0	0	0	0	0	0	0	0	0	0	0	0	0	0	0.526187	0	0	0	0	0	0	0	0	0
C08F11.17	C08F11.17	WBGene00045069	0	0	0	0	0	0	0	0	0	0	0	0	0	0	0	0	0	0	0	0	0	0	0	0	0	0	0	0	0	0	0	0	0	0	0	0	0	0	0	0	0	0	0	0	0	0	0
C08F11.2	C08F11.2	WBGene00007451	0	0	0	0	0	0	0	0	0	0	0	0	0	0	0	0	0	0	0	0	0	0	0	0	0	0	0	0	0	0	0	0	0	0	0	0	0	0	0	0	0	0	0	0	0	0	0
C08F11.3	C08F11.3	WBGene00007452	0	0	0	0	0	0	0	0	0	0	0	0	0	0	0	0	0	0	0	0	0	0	0	0	0	0	0	0	0	0	0	0	0	0	0	0	0	0	0	0	0	0	0	0	0	0	0
C08F11.4	sru-21	WBGene00005684	0	0	0	0	0	0	0	0	0	0	0	0	0	0	0	0	0	0	0	0	0	0	0	0	0	0	0	0	0	0	0	0	0	0	0	0	0	0	0	0	0	0	0	0	0	0	0
C08F11.5	fbxa-98	WBGene00007453	0	0	0	0	0	0	0	0	0	0	0	0	0	0	0	0	0	0	0	0	0	0	0	0	0	0	0	0	0	0	0	0	0	0	0	0	0	0	0	0	0	0	0	0	0	0	0
C08F11.7	C08F11.7	WBGene00007454	0	0	0	0	0	0	0	0	0	0	0	0	0	0	0	0	0	0	0	0	0	0	0	0	0	0	0	0	0	0	0	0	0	0	0	0	0	0	0	0	0	0	0	0	0	0	0
C08F11.8	ugt-22	WBGene00007455	0	0	0	2.62062	0	0	0	0	0	0	0	0	0	0	0	0	0	0	0	0	0	0	0	0	0	0	0	0	0	0	0	0	0	0	0	0	0	0	0	0	0	0	0	0	0	0	0
C08F11.9	srz-29	WBGene00007456	0	0	0	0	0	0	0	0	0	0	0	0	0	0	0	0	0	0	0	1.17145	0	0	0	0	0	0	0	0	0	0	0	0	0	0	0	0	0	0	0	0	0	0	0	0	0	0	0
C08F8.1	pfd-1	WBGene00007443	53.0417	46.8853	61.5095	48.7805	68.2928	71.9597	76.9698	102.037	112.18	154.323	127.333	90.1832	92.6148	140.662	114.206	125.826	130.904	146.584	116.466	139.276	136.187	144.28	137.66	96.2843	121.738	97.1972	100.805	98.4722	103.708	117.996	120.144	110.307	113.739	130.049	128.862	122.382	135.094	138.782	129.241	101.248	107.037	123.832	100.934	117.941	110.397	97.9584	84.1928
C08F8.15	C08F8.15	WBGene00219217	0	0	0	0	0	0	0	7.46062	4.46969	6.45968	6.4635	1.54596	1.31153	11.6637	12.4419	14.0118	12.5968	9.47077	13.0898	17.5818	18.2421	22.7705	7.17866	0	35.7745	52.8656	51.7921	46.5677	38.2898	42.0167	24.8063	22.067	40.7565	39.8535	36.2654	39.7749	38.6484	36.7074	40.705	45.278	35.2296	32.2318	4.71012	6.58293	30.7903	65.0404	54.1301
C08F8.2	C08F8.2	WBGene00007444	41.1113	67.2314	41.8936	70.6542	11.5874	39.0567	36.7032	16.4734	16.3015	10.7997	6.42237	17.7777	11.2129	4.19167	6.05303	5.16545	4.10093	3.15494	3.07881	3.40962	2.10106	3.03936	3.70408	17.3561	0	4.54397	4.33757	1.78974	1.77902	3.76406	7.24946	3.22265	4.17004	1.49509	3.05261	5.83708	7.9134	4.01386	2.95785	2.6303	2.9401	5.98271	6.41595	9.63411	0	2.07602	3.37995
C08F8.3	C08F8.3	WBGene00007445	147.72	136.583	139.37	155.372	129.599	159.783	125.866	211.111	216.838	191.903	199.446	175.826	121.054	160.262	172.016	157	159.06	161.989	155.2	171.034	157.566	157.06	209.167	121.247	39.2549	57.0723	53.3884	29.6058	45.5092	65.9739	55.2189	58.2168	63.7726	44.1115	45.073	54.6992	63.1727	34.9421	32.8837	18.9695	132.241	95.1712	168.617	84.0581	0	3.03728	4.47999
C08F8.4	mboa-4	WBGene00007446	0	0	0	0	0	0	0	0.693521	0.753712	0.311639	1.09873	1.5657	0.262177	2.91227	0	1.19196	2.00598	0.651847	0.377722	1.53573	1.18386	0	1.40246	0	2.93478	9.17426	3.76355	4.2172	7.40115	6.87641	2.37166	4.74635	3.10566	2.35501	2.72479	3.85208	1.4854	4.11055	2.86085	2.92774	5.1463	3.94212	2.81691	0	0	0	1.68977
C08F8.5	fbxb-9	WBGene00007447	0	0	0	0	0	0	0	0.326081	0.285472	0.627422	0	0	0	0	0.587355	0.792007	0.487201	0	1.39311	1.0088	1.04583	4.74994	0	0	0	2.2237	0.543223	1.11373	3.55847	0	1.47037	0	1.5683	0.591012	1.07539	2.0277	0.300071	7.81314	1.12482	0	1.55608	0.791748	0	0.34911	0	0	0
C08F8.6	C08F8.6	WBGene00007448	0	0	0	0	0	0	0	0	0.171365	1.98221	1.46276	0.753346	0	0	0	0.74606	0	0.404651	0	0.864842	1.04583	0	0	0.942699	0	0	1.85412	0	0	0	0	0	0.449755	0	0.843675	1.26296	0.900434	1.98195	1.13133	1.63971	0	0	0	0	0	0	0
C08F8.7	rap-3	WBGene00004309	0	0	0	0	6.72346	0	0	0.249995	0	1.35479	0	0	0.262177	0	0	0	0	0	0	0	0	0	0.496827	0	0	0	0	0	0	0	0	0	0	0	0	0	0	0	0	0	0	1.09024	0	0	0	0	0
C08F8.8	nhr-67	WBGene00003657	0	0	0	0	0	0.234108	0	0	0	0.338864	0.364358	0	0	0	0	0	0	0	0.235491	0	0	1.56792	0	0	0	0	0	5.63568	0	0	0	2.2534	0	0.380654	0.568734	0.819649	0	1.0525	0	0	0	1.98877	0	0	0	0	0
C08F8.9	C08F8.9	WBGene00007449	10.304	5.70021	21.6127	10.912	13.2933	13.9525	15.367	13.8139	16.144	21.2378	15.669	16.483	13.2506	21.7075	12.7729	13.6165	4.56741	13.0463	6.29877	5.21514	15.6136	36.6919	9.25365	6.33906	3.04036	2.92562	11.5975	2.96014	6.52126	8.31062	8.06106	6.66222	11.1846	5.04495	9.78493	8.20487	12.0707	10.6527	82.6955	64.4829	3.7962	12.246	17.524	17.1774	0	20.3627	9.03882
C08G5.1	C08G5.1	WBGene00015614	0	0	0	0	0	0	0	0	0	0	0	0	0	0	0	0	0	0	0	0	0	0	0	0	0	0	0	0	0	0	0	0	0	0.234464	0.722232	0	0	0	0	0	0	0	0	0	0	0	0
C08G5.2	fbxc-48	WBGene00015615	0	0	0	0	0	0	0	0	0	0	0	0	0	0	0	0	0	0	0	0	0	0	0	0	0	0	0.639352	0	0	1.14071	1.47037	0.511496	0.892218	0	0.816637	1.95699	0	0	0	0	0	0	0	0	0	0	0
C08G5.3	C08G5.3	WBGene00015616	0	0	0	0	0	0	0	0	0	0	0	0	0	0	0	0	0	0	0	0	0	0	0	0	0	0.419519	0	0	0	0	0	0	0	0	0	0	0	0	0	0	0	0	0	0	0	0	0
C08G5.4	snt-6	WBGene00004926	0	0	0	0	0	0	0	0	0	0	0	0	0.460292	0.970518	0.341031	0.841967	0.515653	2.24995	0	0.492291	0	1.01287	0	0	7.93203	4.14664	10.917	11.1786	4.45847	8.4875	20.2134	30.4005	13.951	11.7667	17.1341	25.1342	0.604075	2.3334	0	2.84821	4.07649	1.12838	2.17242	1.07069	0	0	0
C08G5.6	C08G5.6	WBGene00015618	0	0	0	0	0	0	0	0	0	0	0	0	0	0	0	0	0	0	0	0	0	0	0	0	0	0	0	0	0	0	0	0	0	0	0	0	0	0	0	0	0	0	0	0	0	0	0
C08G5.7	C08G5.7	WBGene00044418	0	0	0	0	0	0	0	0	0	0	0	0	0.504344	0	0	0	0	0	0	0	0	0	0	0	0	0	0	0	0	0	0	0	0	0	0.726952	0	0	0	0	0	0	0	0	0	0	0	0
C08G9.1	C08G9.1	WBGene00015619	0	0	0	0	0	0	0	0	0.123597	0.311639	0.302753	0	0	0	0	0	0	0	0.691059	6.32301	3.14689	0	0	0	0	0.419519	18.6975	22.5861	0	4.36447	13.9232	8.83154	1.11004	0.849639	26.347	18.9908	1.66053	5.9175	1.37645	1.51342	1.11261	0	0	0.34911	5.80703	0	0
C08G9.2	C08G9.2	WBGene00015620	0	0	1.81653	5.14133	0	0	0	0.304486	0.551962	0.894714	0.257424	0.718698	0.524419	1.6873	1.15078	2.18393	0	0.368254	0.737032	0.502594	0	0	0.865959	3.04202	0	0	0	2.68494	0	0	0	1.10695	0	0.280663	0	0	0.333352	0	0	0	0	0.502	0	0	0	0	0
C08H9.1	C08H9.1	WBGene00007462	0	0	0	0	0	0	0	0	0	0.623355	0	0	0	0	0	0	0	1.00916	0	0.516505	0	0	0	0	0	0	0	0	0	0	0	0	0	0	0	0	0.666786	0	0	0	0	0	0	0	0	0	0
C08H9.10	C08H9.10	WBGene00007469	0	0	0	0	0	0	0	0	0	0	0	0	0	0	0	0	0	0	0	0	1.18386	0	0	0	0	0	0	0	0	0	0	0	0	0	0	0	0	0	0	0	0	0	0	0	0	0	0
C08H9.11	C08H9.11	WBGene00007470	0	0	0	0	0	0	0	0	0	0	0	0	0	0	0	0	0	0	0	1.17145	0	2.72395	0	0	0	0	0	0	0	0	0	0	0	0	0	0	0	0	1.94543	0	0	0	0	0	0	0	0
C08H9.12	C08H9.12	WBGene00007471	0	0	0	0	0	0	0	0	0	0	0	0	0	0	0	0	0	0	0	1.17145	0	0	0	0	0	0	0	0	0	0	0	0	0	0	0	0	0	0	0.568984	0	0	0	0	0	0	0	0
C08H9.13	C08H9.13	WBGene00007472	0	0	0	0	0	0	0	0	0	0.311639	0.291027	0	0	0	0.533593	0	0.487201	0	0.618733	0	0	0	0	0	0	0.764779	0	0	0	3.44293	0	0	0	0	0	0	0	0	0	0	0	0	0	0	0	0	0
C08H9.14	C08H9.14	WBGene00007473	0	0	0	0	0	0	0	0	0	0.311639	0	0	0.379964	0	0	0	0	0	0	0	0	0	0	0	0	0	0	0	0	0	0	0	0	0	0	0	0	0	0	0	0	0	0	0	0	0	0
C08H9.15	C08H9.15	WBGene00007474	0	0	0	0	0	2.50818	0	0	0	0	0.291027	0.753346	0.504344	0	0	0	0	0.202301	0.890991	0	0	0	0	0.853508	0	0	0	0	0	0	0	0.610073	0	0	0	0.304604	0	0	4.13136	8.48856	0	0.445241	0.936157	0	0	0	0
C08H9.16	C08H9.16	WBGene00086566	17.1775	15.6629	17.6857	15.5705	16.5794	16.6107	22.6948	23.094	22.4719	37.7331	35.8877	48.4771	62.3784	13.2565	12.7924	9.08971	7.60161	11.7244	9.11243	17.7969	22.7298	7.63758	46.1473	61.1871	8.8065	9.45323	18.804	26.7843	4.88453	9.48647	8.73481	15.2621	12.6735	13.691	16.3245	14.1365	17.598	22.1451	32.2382	16.8077	18.1381	17.4953	57.1542	63.8682	72.2244	36.0961	31.8264
C08H9.18	C08H9.18	WBGene00206395	0	0	0	0	0	0	0	0	0	0	0	0	0	0	0	0	0	0	0	0	0	0	0	0	0	0	0	0	0	0	0	0	0	0	0	0	0	0	0	0	0	0	0	0	0	0	0
C08H9.2	C08H9.2	WBGene00007463	98.1884	91.7387	56.9184	239.722	269.454	247.836	249.666	144.737	149.427	156.634	138.314	215.452	235.842	83.9186	71.4252	61.8357	83.7071	77.7153	78.8071	93.9489	125.165	123.94	129.409	320.221	91.9716	129.528	98.8948	109.143	123.008	114.117	72.5571	115.809	115.317	100.969	137.765	138.634	123.052	140.612	139.141	127.731	104.867	116.322	200.466	268.707	166.935	127.545	124.405
C08H9.3	C08H9.3	WBGene00007464	12.2104	9.3643	7.75783	10.1846	15.0269	8.54256	3.82249	4.73846	4.40625	2.90707	2.16221	5.48712	6.83022	1.70174	1.34334	0.792007	1.78178	3.65556	1.19986	0.994886	0.9172	1.69163	2.56286	7.06407	6.7427	1.0783	0.639352	1.11373	0	3.06866	1.47037	3.10262	1.25833	0.827202	2.12318	2.40855	2.31062	3.72982	2.86749	3.63961	2.13881	5.44464	5.68085	7.40435	12.3817	3.67578	1.39494
C08H9.4	C08H9.4	WBGene00007465	0	0	0	0	0	0	0	0.0831624	0	0	0.257424	0	0.460292	0	0	0	0.515653	0	0	0	0	0	0.622063	0	0	0	0	0	0	0	0	0	0	0	0	0	0	0	1.85518	3.51623	0	0	0	0	0	0	0
C08H9.5	old-1	WBGene00003862	0	0	0	0	0	0	0	0	0	0	0	0	0	0	0	0	0	0	0	0	0	0	0	0	0	0	0	0	0	0	0	0	0	0	0	0	0	0	0	0	0	0	0	0	0	0	0
C08H9.6	C08H9.6	WBGene00007466	0	0	0	0	0	0	0	0	0	0.311639	0	0	0	0	0	0	0	0	0	1.03314	0	0	0	0	0	0	0	0	0	0	0	0	0	0	0	0	0	0.405571	0	0	0	0	0	0	0	0	0
C08H9.7	C08H9.7	WBGene00007467	0	0	0	0	0	0	0	0	0	0	0.291027	0	0	0	0	0	0	0	0	1.17145	0	0	0	0	0	0	0	0	0	0	0	0	0	0	0	0.443315	0	0	0	0	0	0	0	0	0	0	0
C09B7.1	ser-7	WBGene00004780	0	0	0	0	0	0	0	0	0.44025	0	0.364358	0	0	1.57498	0	0	0.487201	0.368254	1.17803	0	2.10106	0.783866	0	0.557906	0	0	0	0	0	0	0	0	0	0.780065	0	0	1.19816	0	0	0	0.685921	4.0473	0	0	0	0	0
C09B7.2	C09B7.2	WBGene00015621	18.3224	14.869	38.0642	31.7764	24.3059	16.3002	29.7364	16.8927	16.4742	14.7345	16.9621	17.5244	18.1791	4.36016	5.38567	3.22221	4.07271	6.1583	2.41413	8.63422	3.55244	10.3629	13.9089	17.2699	0	0	3.84485	3.12249	0	3.52524	10.4433	10.0125	4.14658	2.42608	1.92146	4.41904	4.39399	5.3023	7.63489	5.4422	2.73457	5.9875	5.24821	7.5445	0	3.67578	1.68977
C09B8.1	ipp-5	WBGene00002146	0	0	0	0	0	0	0	0.10173	0.123789	0	0	0	0	0	0	0	1.94934	0	0	0.516505	0	0	0	0	0	0	0	0	0	4.56452	0	0	0.223847	0	2.07093	0	0	0	0	0	0	0	0	0	0	0	0
C09B8.3	C09B8.3	WBGene00015622	0	0	0	0	0	0	0	0	0	0	0	0	0	0	0	0	0	0	0	0	0	0	0	0	0	0	0	0	0	0	0	0	0	0	0.722232	0	0	0	0	0	0	0	0	0	0	0	0
C09B8.4	C09B8.4	WBGene00015623	0.997811	0	0	0.791346	0	0.702496	0.315135	8.91074	8.18402	7.79146	7.2105	7.44506	5.45091	11.5649	13.4091	28.6126	5.56174	7.08365	10.6394	4.39083	9.43436	9.66406	6.37058	0.557906	5.97514	10.2116	27.6925	13.0665	15.2683	18.8962	22.4422	20.6641	10.8667	9.77808	19.5785	13.1816	8.91285	2.27989	11.1911	22.2918	5.40169	7.24689	4.94759	7.71033	6.1901	14.4387	1.68977
C09B8.5	C09B8.5	WBGene00015624	32.0514	37.232	45.7705	18.4973	31.0575	23.3612	19.1904	25.3005	22.5103	18.393	23.6965	13.1456	2.81793	34.2467	30.229	33.7718	17.2168	30.7449	20.2943	41.7535	32.0184	41.0581	23.9521	2.35411	52.0993	63.9315	75.6131	74.8005	69.6499	78.0927	59.2435	46.827	78.8098	50.0122	77.8631	54.0751	62	94.496	48.8868	35.7358	78.2683	74.5664	31.1084	13.2639	77.0105	71.2755	46.9212
C09B8.6	hsp-25	WBGene00002023	2.99416	0	5.44238	9.60997	1.20939	11.3664	0.315135	2.33441	2.33856	1.15314	2.05373	0.881358	1.52654	2.53126	5.07298	3.02208	4.04149	2.83682	2.40475	0.502594	5.51548	3.31195	3.35337	1.11595	5.87029	2.16085	9.92796	1.9326	3.13164	5.23089	1.5593	2.43094	4.32787	3.83581	1.36999	1.35032	1.80224	1.86374	3.80095	17.394	8.58292	8.58352	1.88075	1.88601	5.80703	3.67578	0
C09B8.7	pak-1	WBGene00003911	27.4941	24.8077	8.92367	40.9092	33.3671	27.7612	9.53788	68.1237	60.6354	63.5228	37.4288	36.3369	15.2726	67.7908	61.3496	79.5696	86.6041	74.5813	81.6821	82.0352	37.6907	52.244	53.975	32.701	74.4354	62.5008	60.9428	83.5779	70.099	88.6825	65.6885	64.22	62.3981	63.6004	68.9444	94.6005	96.1847	62.2792	42.735	53.4177	48.4131	65.9518	46.611	15.3535	54.4073	61.9919	75.4771
C09B8.8	C09B8.8	WBGene00015625	0	0	0	0	0	0	0	0	0	0	0	0	0	0	0	0	0	0	0	0	0	0	0	0	0	0	0	0	0	0	0	0	0	0	0.194083	0	0	0	0	0	0	0	0	0	0	0	0
C09B9.1	C09B9.1	WBGene00015626	0	0	0	0	0	0	0	0	0	0.627422	0	0	0	0	0	0.792007	0	0	0.445441	0	0	0	0	0	0	0	0	0	0	0	0	0	0	0	0	0	0	0	0	0	0	0	0	0	0	0	0
C09B9.2	C09B9.2	WBGene00015627	0	0	0	0	0	0	0	0.0831624	0	0	0	0	0.262177	0	0	0.595905	1.46175	0.317388	0.245617	0	0	0	0.496827	0	0	0	0	0	0	0	0	1.12157	0	0	0	0	0	0	0	0	0	0	0	0.593779	0	0	0
C09B9.3	C09B9.3	WBGene00015628	0	0	0	0	0	0	0	0.16076	0	0	0	0	0	0	0	0	0	0	0	0.864842	0	0	0	0	0	0	0	1.11373	0	0	0	0	0	0	0	0	1.91968	0	0	0	0	0	0	0	0	0	0
C09B9.4	C09B9.4	WBGene00015629	0	0	0	0	0	0	0	0	0	0	0	0	0	0	0	0	0	0	0	0	0	0	0	0	0	0	0	0	0	0	0	0	0	0	0	0	0	0	0	0	0	0	0	0	0	0	0
C09B9.6	msp-55	WBGene00003448	0	0	0	0	0	0	0	0.351725	0	0	0	0	0	0	0	0	0	0.209321	0	0	0	0.907762	0.858298	0	0	0	0	2.00849	1.75289	0	0	0	0.883277	0	0	0	0	0	0	0.504349	0.300779	0.319305	0	0	0	3.67578	0
C09B9.7	C09B9.7	WBGene00015630	0	0	0	0	0	0	0	0	0.171365	0	0	0	0	0	0	0	0	0	0	0	0	0	0	0	0	0	0	0	0	0	0	0	0	0	0	0	0	0	0	0	0	0	0	0	11.6155	0	0
C09B9.8	C09B9.8	WBGene00044484	0	0	0	0	0	0	0	0	0	0	0	0	0	0	0	0	0	0	0	0	0	0	0	0	0	0	10.697	0.894763	0	0	1.47037	0	0	0	0	0	0.540871	0	0	0	0	0	0	0	0	0	0
C09C7.1	zig-4	WBGene00006981	0	0	0	0	0	0	0	0.272618	0.838109	1.55896	3.5841	0	0	3.26228	3.47902	7.26017	11.5888	4.0995	13.8975	1.00531	0	2.72395	0	0	18.4861	17.0068	0	1.11373	1.77902	2.22943	13.2176	5.51102	5.97217	3.16041	1.41917	4.43836	1.62808	4.84153	0	0.819757	0.685921	0.369881	0.761264	0	0	0	0
C09D1.1	unc-89	WBGene00006820	0	0	0	0	0	0	0	0.427812	1.51212	0.627422	2.25334	0	0.504344	3.38905	0.80975	2.97251	3.07018	0	0	2.68284	0	1.79674	0	0	3.37094	3.23568	0.639352	1.03784	0	2.2817	3.65672	0.910325	0.944739	0.703563	0.485819	1.94428	0.89488	3.3859	30.0226	8.2439	0.749543	1.39879	2.80916	2.44556	0	0	1.39494
C09D1.2	clec-89	WBGene00015631	0	0	0	0	0	0	0	0	0	0	0	0	0	0	0	0	0	0	0.33084	0	0	0	0	0	0	0	0	0	0	1.39041	0	0	0	0	0	0	0	0	0.68814	0	0	0	0	0	0	0	0
C09D4.1	C09D4.1	WBGene00015632	0	2.3937	2.06191	2.62062	4.64887	2.50818	0	0.452618	0.236148	0.610223	0.838039	0	0	0	0	0	0	0.79038	0.776281	1.66374	0	0	1.52758	0	0	0	0.643177	0	0	0	0	0	0	0.234464	0	0	0	0	0	0.504349	2.2062	1.84196	1.3995	0	0	0	4.57253
C09D4.2	C09D4.2	WBGene00015633	0	0	1.68133	0	0	0	0	0.0831624	0.283724	0.271359	0.721203	1.15192	0.504344	0	0.745857	0	1.03143	0.202301	0	0	2.22969	0.783866	0.817476	9.12829	0	0	0.643177	1.03784	1.35263	1.14071	1.28505	0.511496	1.69796	2.05207	1.81224	0	2.09304	4.55224	6.87235	6.98501	5.26584	7.48825	0.626765	0.34911	0	0	9.09468
C09D4.3	C09D4.3	WBGene00015634	0	0	1.81653	0	0	0	0	0.26249	0.535126	0	0.291027	0.39626	0	0	0	0.595905	0	0.202301	1.20057	0	0	0	0	0	0	0.419519	0.639352	1.02754	0	0	0.90129	0.72956	0.321055	0.365783	0.729369	0	0	0.405571	1.37645	0	1.61427	1.14927	0.337356	0	0	0	0
C09D4.4	C09D4.4	WBGene00015635	90.7932	103.559	49.9549	110.926	104.76	56.9617	67.566	23.2616	30.7358	7.0693	3.46603	12.9153	5.88866	8.0185	13.0253	3.72218	8.60718	5.68182	5.10094	1.99374	2.75227	0	5.85177	9.07413	5.87029	3.87725	3.63654	5.32089	6.52126	2.94919	2.18634	0.511496	1.94951	1.55653	2.30507	4.97869	3.87576	6.85567	2.94456	1.81054	2.3734	4.09304	9.01427	2.43628	8.19806	8.78908	4.57253
C09D4.5	rpl-19	WBGene00004431	4.06816	17.623	10.6062	23.2024	22.1181	18.5756	17.1822	70.9688	76.062	86.6196	78.9913	61.109	44.692	120.614	119.996	116.62	107.385	120.968	118.262	104.948	180.884	168.732	101.737	35.9079	155.782	161.977	172.498	174.157	147.586	182.179	198.362	191.745	190.59	191.481	178.763	185.362	173.433	217.198	202.247	202.69	225.552	192.457	134.135	72.9013	293.962	273.887	303.023
C09D4.6	C09D4.6	WBGene00015636	0	0	0	0	0	0	0	0	0	0	0	0	0	0	0.404826	0	0	0	0	0	0	0	0	0	0	0	0	0	0	0	0	0	0	0	0	0	0	0	0	0	0	0	0	0	0	0	0
C09D4.9	C09D4.9	WBGene00206357	0	0	0	0	0	0	0	0.387716	0.182698	0	0.257424	0.359305	0	0	0	0	0	0.202301	0	0	0	0	0	0	0	0	0	0	0	0	0	0	0	0	0	0	0.300071	0	1.13133	0	0	1.78795	0.337356	0	0	0	0
C09D8.1	ptp-3	WBGene00004215	26.0226	35.0068	18.8654	39.6695	41.2632	27.3083	21.9037	47.3192	47.8037	35.2145	36.9783	36.2089	40.0709	28.0388	21.6693	28.0132	27.6807	22.7561	26.4005	39.9478	37.9121	24.0859	35.8387	30.8773	28.4845	29.6674	36.7488	63.9985	19.5204	31.1266	32.0517	41.3199	24.7161	37.9563	39.283	48.7079	31.0221	36.2798	46.2163	29.9648	31.9556	40.5969	44.0207	15.9687	191.853	93.59	232.23
C09E10.2	dgk-1	WBGene00000958	0	0	0	0	0	0	0	0.16076	0.171365	0	1.23765	0	0	0.91434	0.404826	2.33027	0	1.74524	2.95148	5.2142	8.29308	0	0	0	0	1.0783	0	0	1.75289	0	4.67903	0	0.258851	1.41231	0.535286	0.304604	0.228094	0	1.16704	0	0.300779	0	0	0	0	0	0
C09E7.1	srxa-5	WBGene00015637	0	0	0	0	0	0	0	0	0	0	0	0	0	0	2.44464	1.4923	1.00285	0.418694	0.978016	0	0	0	0	0	0	0	1.65173	0	0	1.34295	0	2.91931	0.22485	0.448663	0	0.460697	2.21975	0	0	0	0	0.132087	0	0	0	0	0
C09E7.10	C09E7.10	WBGene00044295	0	0	0	0	0	0	0	0	0	0	0	0	0	0	0	0	0	0	0	0	0	0	0	0	0	0	0	0	0	0	0	0	0	0	0	0	0	0	0	0	0	0	0	0	0	0	0
C09E7.2	pqn-10	WBGene00004102	0	0	0	0	0	3.05731	0	27.9585	43.4243	12.0605	120.834	0.755565	0.766522	48.5155	176.883	45.8949	101.338	31.5307	142.177	20.191	3.13827	12.2328	8.73749	0	0	0.764779	1.23537	0.894763	0	1.97973	1.47037	2.56367	0.553522	0.919317	2.27437	1.97426	0	0.526187	0.568984	1.32411	0	0.132087	0	0.34911	0	0	0
C09E7.3	oig-1	WBGene00003859	0	0	0	0	0	0	0	0	0	0	0.621781	0	0	0	0	0	2.55057	0	0	0	1.04583	1.01287	0	0	0	0	1.19219	0	0	0	3.02967	1.10695	0	0	2.04365	1.27252	0	0	0	0	0	0	0	0	0	0	0
C09E7.4	C09E7.4	WBGene00015638	10.1741	19.4761	5.17194	7.08926	17.234	15.9068	12.4343	20.2469	23.1597	14.2935	19.8766	17.7671	15.79	19.0332	22.8506	21.1863	23.5016	17.2201	25.9619	19.5937	18.1041	12.7517	17.7929	21.8056	6.30572	8.92732	21.5887	9.28463	3.10551	6.6933	15.96	10.057	19.1151	8.60281	9.02304	12.077	18.528	26.7152	23.5278	23.0273	18.483	12.9031	12.9757	6.93239	12.3817	2.07602	6.81767
C09E7.5	C09E7.5	WBGene00015639	0	0	0	0	0	0	0	0	0	0	0	0	0	0	0	0	0	0	0	0	0	0	0	0	0	0	0	0	0	0	0	0	0.665864	0	0	0	0	0	0	0	0	1.09997	0	0	0	0	0
C09E7.6	C09E7.6	WBGene00015640	0	0	0	0	0	0	0	0	0	0	0	0	0	0	0.404826	0	0	0	0	0	0	1.62032	0	0	0	0	0.639352	0	0	0	0	0	0	0	0.357944	0	0	0	0	0	0	0	0	0	0	0	0
C09E7.7	C09E7.7	WBGene00015641	4.06816	4.19288	12.4407	5.68958	8.64439	9.55313	0.315135	15.9533	25.074	19.1782	20.113	10.1932	6.09964	22.3216	18.8861	13.4939	20.7045	20.8273	20.2193	19.7813	27.4471	21.8203	16.3768	8.23925	18.2596	20.8213	20.6548	22.3165	27.0634	6.70787	16.7881	16.0153	13.9419	19.6558	17.8557	14.0585	21.5039	17.6249	22.56	10.6453	19.5979	14.9301	11.3356	11.9908	20.1952	13.582	8.22716
C09E7.8	C09E7.8	WBGene00015642	15.9943	16.1143	10.7325	13.0246	17.9433	30.0235	7.29321	8.10496	9.47603	7.10133	9.27473	1.25799	3.0458	9.69186	8.15496	7.24128	13.7618	6.54811	11.8657	14.4925	22.5796	14.1872	7.56233	2.05865	7.93203	5.89354	3.6126	6.92236	11.3176	10.0182	14.0153	5.99755	8.67227	11.3151	9.06258	11.3503	9.79937	11.9061	6.3055	6.73209	11.9016	8.3992	6.05959	3.48486	5.80703	0	0
C09E7.9	C09E7.9	WBGene00015643	0	3.45157	0	2.52071	0	6.03376	0	0.756838	0.306487	0.311639	0.882	0.376627	0.460292	1.81406	0.587355	2.38449	2.12319	5.27723	1.74971	0	1.83462	3.61248	0.865959	0	3.37094	0	2.91658	3.58036	1.35263	0	2.70453	1.02312	2.53039	6.19792	1.93901	0.988031	3.60205	7.67189	4.19562	4.75676	0.749543	7.05616	3.76289	1.41989	11.9971	5.7518	6.2623
C09E8.1	C09E8.1	WBGene00015644	2.03383	1.12418	2.06191	9.67552	0	1.17111	0.630346	7.67985	5.60306	4.82685	5.33922	5.38891	2.65613	5.93514	7.56066	13.5481	11.2528	7.86733	11.519	2.72478	5.10207	6.23376	4.28276	2.61683	3.04036	3.99071	6.44373	9.92929	1.77902	1.34295	7.10856	4.79728	6.19375	3.71896	2.2448	6.6001	2.53752	1.33743	5.00999	5.22619	7.4372	2.81895	4.00341	2.86797	6.1901	3.67578	8.79568
C09E8.2	lips-7	WBGene00015645	0	0	0	0	0	0	0	0	0	0	0	0	0	0	0	0	0	0	0	0	0	0	0	0	0	0	0	0	0	0	0	0	0	0	0	0	0	0	0	0.504349	1.62386	0	0	0	0	0	2.27284
C09E8.3	mlt-10	WBGene00015646	0.997811	1.50734	0	0.527499	0	3.21068	0.945635	2.82561	0.865378	2.52524	3.97819	4.02575	3.63137	4.17662	3.99014	7.83564	2.29756	8.4432	12.7931	14.0015	10.9056	17.6746	2.32006	0.557906	29.6898	17.1671	44.7886	24.1685	27.1574	24.2729	24.9927	29.5123	35.7851	24.1809	32.8595	33.5046	16.8033	18.7762	26.7364	28.2772	28.3658	26.8915	9.08274	6.64076	12.3817	18.5943	32.6918
C09E8.4	C09E8.4	WBGene00206410	0	0	0	0	0	0	0.315135	0.10173	0	1.35479	1.67797	0	0	4.67089	2.28332	0	2.26898	1.62835	2.52619	2.05249	2.10106	1.92063	0	0	0	0.419519	0	0	0	0.839022	0	0	0.365595	0.380654	0	0.460697	0.581258	1.33743	0.568984	0	0.601632	4.65997	0	0.34911	0	0	1.68977
C09E9.1	C09E9.1	WBGene00007476	61.3167	64.7611	62.3428	43.4243	28.3289	46.7523	51.1889	42.2514	34.8832	40.2821	35.325	40.9132	22.7842	21.4483	26.3067	27.0564	21.99	17.6723	17.6338	15.9469	7.47007	14.4453	30.8043	36.2097	9.34608	4.96359	6.17044	4.15002	3.41542	10.2232	7.92121	6.94302	5.88699	2.74093	2.59767	5.16914	8.31155	4.85435	14.0718	10.9072	16.2512	6.31809	24.3755	29.5872	0	4.53332	1.39494
C09F12.1	clc-1	WBGene00000522	0	0	0	0	0	0	0	0	0	0	0	0	0	0	0	0	0	0	0	0	0	0	0	0	0	0	0	0	0	0	0	0	0	0	0	0	0	0	0	0	0	0	0	0	0	0	2.27284
C09F12.2	C09F12.2	WBGene00007482	0	0	0	0	0	0	0	0	0	0.338864	0	0	0	0	0	0	0	0	0	0	0	0	0	0	0	0	0	0	0	0	0	0	0	0	0	0	0	0	0	0	0	0	0	0	0	0	0
C09F12.3	C09F12.3	WBGene00007483	0	0	0	0	0	0	0	0	0	0	0.257424	0	0	0	0	0	0	0	0	0	0	0	0	0	0	0	0	0	0	0	0	0	0	0	0	0	0	0	0	0	0	0	0	0	0	0	0
C09F5.1	C09F5.1	WBGene00015647	16.2846	8.47744	18.8582	21.1192	9.48821	18.4139	48.2561	12.8633	11.5415	11.0751	12.7172	14.1749	16.1692	4.68496	9.6684	11.4277	4.47141	7.46319	6.9416	4.38231	5.89984	1.62032	13.5076	14.9553	8.8065	2.19727	4.25759	4.15289	5.19444	5.1548	2.57042	5.64141	7.85879	7.08333	4.61739	7.52596	7.65329	2.14906	3.95119	2.96422	4.93916	7.10671	18.7462	12.1267	0	0	1.39494
C09F5.2	orai-1	WBGene00015648	12.2104	19.7306	18.3834	29.1116	14.6973	14.7582	20.0394	26.0118	28.8873	26.7162	14.9235	31.8366	31.8613	7.76427	15.5176	9.08519	4.99805	7.31829	9.73071	6.93378	13.642	8.11548	7.77474	23.0555	13.9094	10.9196	6.86296	13.0442	9.01062	9.96559	10.1998	6.9865	9.9289	13.9667	10.4936	6.87539	4.56336	8.30114	4.54815	11.9149	4.3677	5.73215	22.1266	37.2634	5.80703	13.2666	9.85179
C09F5.3	C09F5.3	WBGene00015649	0	0	0	0	0	0	0	0.143794	0.171365	0	0	0.376627	0	0	0	0.74606	0	0.209321	0	0	0	0	0	0	0	0	0	0	0	0	0	0	0	0	0	0	0	0	0	0	0	0.237794	2.17242	0	0	0	0
C09F9.1	C09F9.1	WBGene00007478	0	0	0	0	0	0	0	0.143794	0.332192	0	0	0	0	0	0	0	0	0	0.2565	0	0	0	0	0	0	0	0	0	0	0	0	0	0.223847	0	0.726952	0	0	0	0	0	7.90512	0	0	0	0	0	0
C09F9.2	C09F9.2	WBGene00007479	0	0	0	0	0	0	0	0	0	0	0	0	0	0	0.533593	0	0	0	0	0	0	0	0	0	0	0	0	0	0	0	0	0	0	0	0	0	0	0	0	0	0	0	0	0	0	0	0
C09F9.3	glna-1	WBGene00007480	0	0	0	0	0	0	0	0	0	0	0	0	0	0	1.21284	0	0	0	0	0	0	0	0	0	0	0	0	0	0	0	0	0	0	0	0	0	0	0	0	0	0	0	0	0	0	0	0
C09G1.1	pqn-11	WBGene00004103	0	0	0	0	0	0	0	0	0	0	0	0	0	0	0	0	0	0	0	0	0	0	0	0	0	0	0	0	0	0	0	0	0	0	0	0	0	0	0	0	0	0	0	0	0	0	0
C09G1.2	C09G1.2	WBGene00007484	0	0	0	0	0	0	0	1.07173	0	0	0	0	0	6.24626	5.58162	3.7651	3.15485	1.32497	2.81916	2.22615	0	0	0	0	0	0.888768	0.543223	0	0	0.839022	1.28505	3.90736	0.661985	0.701253	0.194083	0.757589	0.333352	0.405571	1.68744	0	0.685921	0.237794	0	0	0	0	0
C09G1.3	C09G1.3	WBGene00007485	0	0	0	0	0	0	0	0.71602	0.581846	0	0.560177	0	0	0	0.928387	0	0.487201	1.5908	0.91648	1.7299	2.36801	0	0	3.04202	0	0	0.643177	0	0	1.14071	0	0.733	0.653366	3.01575	0.495675	0	0.540871	0.405571	0	0	0.627574	0.574563	0.936157	0.593779	0	0	0
C09G1.4	C09G1.4	WBGene00007486	3.43383	3.51816	7.62218	7.92637	0	1.17111	0.630346	5.6939	6.86375	1.73634	2.20605	2.45978	2.05109	6.11808	7.50923	6.89946	3.03789	5.23625	4.65493	7.48684	2.10106	2.7045	3.79222	1.79621	16.9535	8.76019	7.19122	10.8283	3.10551	5.52811	6.3032	3.37512	10.4868	4.94883	5.60524	5.25962	4.80595	4.16939	3.06389	12.9842	3.3359	4.47042	4.07285	6.84288	0	0	0
C09G1.5	C09G1.5	WBGene00007487	3.99271	1.12418	1.81653	1.58327	2.41908	9.87003	0.945635	13.6285	13.9073	17.5391	17.8343	7.67711	3.20216	34.6112	38.3006	48.863	31.9839	26.8049	35.8032	31.1478	36.255	22.6142	19.8604	4.15797	75.8503	70.2333	47.6084	42.7551	70.05	76.4664	70.3312	70.3257	45.0401	61.926	53.9133	40.0707	69.4381	56.2155	48.6449	48.6883	71.0961	62.5322	28.2418	40.9214	44.583	18.7166	59.5295
C09G12.1	ceh-53	WBGene00015651	0	0	0	0	0	0	0	0	0	0	0	0	0	0	0	0	0	0.202301	0	0	0	0	0	0	0	0	0.543223	0	0	0	0	0.511496	0	0	0	0	0	0	0	0	0	0	0	0	0	0	1.39494
C09G12.10	srz-83	WBGene00023462	0	0	0	0	0	0	0	0	0	0	0	0	0	0	0	0	0	0	0	0	0	0	0	0	0	0	0	0	0	1.34295	0	0	0	0	0	0	0	0	0	0	0	0.472442	0	0	0	0	0
C09G12.11	srz-82	WBGene00023463	0	0	0	0	0	0	0	0	0	0	0	0	0	0	0	0	0	0	0	0	0	0	0	0	0	0.888768	0	0	0	0	0	0	0	0	0	0	0	0	0	0	0	0	0	0	0	0	0
C09G12.16	srz-37	WBGene00023474	0	0	0	0	0	0	0	0	0	0	0	0	0	0	0	0	0	0	0	0	0	0	0	0	0	0	0	0	0	0	0	0	0	0	0	0	0	0	0	0	0	0	0	0	0	0	0
C09G12.17	C09G12.17	WBGene00044470	0	0	0	0	0	0	0	0	0	0	0	0	0	0.970518	0.533593	0	0	0	0	0	0	0	0	0	0	0	0.596023	0	0	0	0	0.72956	0	0	0	0	0.300071	0.405571	0	0	0.766797	0.132087	0	0	0	0	0
C09G12.2	srz-79	WBGene00015652	0	0	0	0	0	0	0	0	0	0	0	0	0	0	0	0	0.515653	0	0	0.502594	0	0	0	0	0	0	0	0	0	0	0	0	0	0	0	0	0	0	0	0	0	0.132087	0	0	0	0	0
C09G12.3	srz-78	WBGene00015653	0	0	0	0	0	0	0	0	0	0	0	0	0	0	0	0	0	0	0.491294	0	0	0	0	0	0	0	0	0	0	0	0	0	0	0	0	0	0	0	0	0	0	0	0	0	0	0	0
C09G12.5	C09G12.5	WBGene00015655	0	0	0	0	0	0	0	0	0	0	0	0	0	0	0	0	0	0	0	0	0	0	0	0	0	0	0	0	0	0	0	0	0	0	0	0	0	0	0	0	0	0	0	0	0	0	0
C09G12.6	srz-70	WBGene00015656	0	0	0	0	0	0	0	0	0	0	0	0	0	0	0	0	0	0	0	0	0	0	0	0	0	0	0	0	0	0	0	0	0	0	0	0	0	0	0	0	0	0	0	0	0	0	0
C09G12.8	ced-10	WBGene00000424	365.209	456.325	332.929	245.067	291.986	199.51	173.065	53.9333	50.2642	35.3256	34.7139	30.2025	31.1143	35.9286	39.9655	41.662	34.2131	36.1693	38.6056	26.9548	5.38707	8.17528	25.9328	32.2104	9.34608	20.9309	12.9809	19.8865	21.9838	15.3897	17.8504	15.6593	26.3551	21.3489	13.9913	16.0137	22.8079	17.6858	14.3568	22.8811	8.40244	19.4227	38.5109	19.0078	77.0105	40.1807	53.6475
C09G12.9	tsg-101	WBGene00015658	0	0	0	0	0	0	0	0.702613	0.805663	0	0.924534	1.6347	0	0	0	0	1.14864	1.72566	0.576457	0	1.18386	0.783866	1.38961	0.853508	0	2.5059	0.543223	1.9223	5.31136	0	0	1.85113	2.60133	0.591012	1.59162	1.80768	0.881329	1.06288	1.16704	0	1.6779	0.132087	0.626765	0	8.19806	0	0
C09G4.1	hyl-1	WBGene00002043	113.761	98.1435	124.954	78.1021	64.2616	28.7743	85.1154	14.9931	26.5985	13.9638	10.4332	19.1943	29.1328	2.79942	1.15078	0	2.63897	4.23166	1.29398	3.5152	0.9172	0.783866	4.6434	38.8889	0	0.764779	0.639352	1.9326	1.35263	1.34295	4.12972	4.07471	1.49656	0.637211	1.00941	0.921507	4.05907	0.81124	2.06493	4.858	0	1.21229	8.49309	50.7972	0	0	0
C09G4.2	pkg-2	WBGene00015650	4.06816	1.50734	7.23385	3.31205	0	0.936776	5.45626	1.09816	1.08653	2.95015	0.991791	1.47204	0.884309	1.70174	0.938418	1.58421	1.03143	0.770363	1.28579	0.864842	0	0	0.408688	0	0	2.60804	0.543223	0	0	0	0	0	0.329675	0.380654	0.247903	0	0.540871	0.405571	0	1.17179	0	0.794951	0	1.1877	0	0	0
C09G4.3	cks-1	WBGene00001051	193.052	178.829	177.624	230.687	239.782	249.961	172.663	341.083	361.66	410.849	404.719	433.554	293.974	264.349	288.053	297.963	344.758	322.188	304.472	280.704	255.705	313.941	429.38	262.712	326.248	357.813	345.344	361.983	304.455	302.736	332.412	342.839	320.733	318.312	278.424	298.422	295.111	313.444	252.866	239.492	303.824	324.606	383.612	288.423	261.784	362.217	264.213
C09G4.4	C09G4.4	WBGene00044001	197.079	217.087	174.559	154.428	185.896	132.621	117.567	42.2511	33.6178	32.0609	24.5285	34.9611	37.2579	15.225	10.7862	10.6698	8.32064	10.9034	9.74296	13.8334	10.8951	15.4964	16.7807	56.5589	40.6839	36.1003	24.6464	42.4212	37.4014	36.8606	22.2967	40.7624	35.3694	35.0224	27.4347	36.0685	35.9609	42.0319	25.3405	20.5861	15.2888	14.031	30.7336	39.3102	120.108	69.539	59.0253
C09G4.5	mes-6	WBGene00003224	0	0	0	0.263717	0	0	0.315135	0.352898	0	0	1.57392	0	0.262177	0.787395	0.533593	0	0.487201	0	0	0.502594	0	0	1.11889	0	3.37094	1.80418	1.05571	0	0	0	0	0.910325	0.850657	0.356548	0	0	0.456244	0.526187	0	0.819757	0.627574	0.793006	0	0	5.80703	0	1.68977
C09G5.1	ggr-1	WBGene00001586	0	0	0	0	0	0	0	0.10173	0	0	0.364358	0.39626	0	0	0	0.595905	0	0	0	0	0	0	0	0	0	0	0	0	0	1.39041	0	0.910325	0.321055	0	0.194083	0	0	0	0	0	0.627574	0	0	0	0	0	0
C09G5.13	C09G5.13	WBGene00206538	0	0	0	0	0	0	0	0	0.182698	0	0	0	0	0	0	0	0	0	0	0	0	0	0.622063	0	0	0	0	0	0	0	0	0	0	0	0	0	0	0	0	0	0	0	0	0	0	0	0
C09G5.2	dph-2	WBGene00007488	26.4786	36.8559	38.0164	11.096	9.14254	13.7087	10.4403	8.21214	9.56907	27.3567	18.2315	45.5761	48.2352	3.50178	4.50523	2.23873	3.00909	1.26582	2.46939	3.03358	3.14689	6.80111	36.6446	39.1018	4.45478	2.43173	2.88544	0	4.91109	4.55582	1.47037	4.48207	3.44331	6.54361	7.43743	6.2979	5.59842	10.7114	2.62727	5.82207	4.47114	8.70359	34.6826	27.6862	5.80703	16.6406	5.94117
C09G5.3	col-79	WBGene00000655	0	0	0	0	0	0	0	0	0	0	0	0	0	0	0	0	0	0	0	0	0	0	0	0	0	0	0	0	0	0	0	0	0	0	0	0	0	0	0	0	0	0.472442	0	0	0	0	0
C09G5.4	col-39	WBGene00000616	0	0	0	0	0	0	0	0.102904	0	0	0	0	0	0	0	0	0	0	0	0	4.73717	0	0	0	0	0.419519	0	0	0	0	0	0	0.660286	0	0	0	2.50093	2.3334	0.562342	0	0	9.60222	15.2958	0	0	0	0
C09G5.5	col-80	WBGene00000656	0	0	0	0	0	0	0	0	0	0	0	0	0	0	0	0	0	0	0	0	0	0	0	0	0	0	0	0	0	0	0	0	0	0	0	0	0	0	0	0	0	0	0	0	0	0	0
C09G5.6	bli-1	WBGene00000251	0	0	0	0	0	0	0	0	0	0	0	0	0	0	0	0	0	0	0	0	0	0	0	0	0	0	0	0	0	0	0	0	0	0	0	0	0	0	0	0	0	0	0	0	0	0	0
C09G5.7	C09G5.7	WBGene00007489	0	0	0	3.31205	1.20939	1.40551	0.315135	1.93439	2.1417	2.51159	2.21778	1.27771	0.460292	0	1.06732	1.58803	0.487201	2.39666	1.29583	0.516505	0	1.01287	0.622063	0.557906	1.51999	1.52975	2.91812	9.27871	0	2.94919	1.47037	2.35145	1.72844	1.1319	0.85362	1.29663	1.57	1.0525	0.568984	0.819757	1.66936	3.73556	2.79934	0	0	0	0
C09G5.8	mks-5	WBGene00007490	0	0	0	0	0	0	0.315135	1.1758	1.33476	1.93281	1.21556	1.11496	1.94415	0	1.61767	3.91848	0.515653	1.61222	1.86218	1.47724	0	0	2.06297	0	0	2.15686	0	0	0	2.99665	1.47037	0	0	0.847443	1.01869	1.33206	0.900434	0	0	0	2.58068	1.26054	10.7361	1.44334	0	0	0
C09G9.1	C09G9.1	WBGene00007492	30.9347	29.3943	31.4257	14.7532	10.008	19.2789	22.2766	3.03552	2.2521	3.38773	1.02539	8.88334	15.2096	4.85324	1.46198	0.595905	0	1.29424	0.797515	1.36744	1.96303	1.81574	2.57805	29.4391	0	6.22614	4.35021	3.26557	3.55847	8.78537	0.90129	5.4145	3.52754	3.7269	4.82403	3.5504	2.9261	9.36314	1.25048	3.43221	3.12226	3.76951	4.09299	23.4662	0	2.07602	3.97575
C09G9.2	C09G9.2	WBGene00007493	164.296	169.943	170.96	150.624	191.487	106.951	145.261	128.863	117.783	115.711	116.426	122.233	84.8234	103.443	105.665	95.1356	98.8154	88.7633	92.6395	78.5179	53.636	62.603	105.68	68.1506	28.6998	42.5571	33.0725	20.4584	26.5636	27.1448	25.102	27.9803	30.618	29.9934	24.9695	21.0862	40.3907	22.0973	17.6879	12.6906	40.7011	28.6266	61.4109	59.673	28.3953	41.9992	32.7662
C09G9.3	C09G9.3	WBGene00007494	0	0	0	0	0	0	0	0	0	0	0	0	0	3.6587	0.533593	0	0	0	0	0	0	0	0	0	0	0	0	0	0	0	0	0	0	0	0	0	0	0	0	0	0.601632	0	0	0	0	0	0
C09G9.4	tag-19	WBGene00006409	0	0	0	0	0	0	0	0	0	0	0	0	0	4.24762	1.61767	0	0	3.719	0.445441	0	0	0	0	0	0	0	0	0	0	0	0	0	0.279629	0	0	0	0	0	0	0	0	0	0	0	0	0	0
C09G9.5	C09G9.5	WBGene00007495	0	1.94423	0	0	0	0	0	0	0	0.338864	0	0	0	0	0	0	0	0	0	0	0	0	0	0	0	0	0	0	0	0	0	0	0	0	0	0	0	0	0	0	0	0.319305	0	0	0	0	0
C09G9.6	oma-1	WBGene00003864	500.324	438.952	480.495	410.599	518.619	357.568	706.91	201.721	197.81	187.495	199.405	291.888	577.587	126.568	162.637	164.85	173.272	144.278	163.771	136.899	122.355	125.438	167.327	705.495	171.952	176.941	198.991	168.811	145.754	154.75	153.292	175.865	173.307	176.385	168.775	179.582	109.42	107.283	93.773	89.8835	87.3497	95.0641	226.695	517.961	45.3614	46.1002	27.1204
C09G9.7	npax-4	WBGene00007496	0	0	0	0	0	0	0	0	0	0	0	0	0	0	0	0	0	0	0	0	0	0	0	0	0	0	0	0	0	0	0	0	0	0	0	0	0	0	0	0	0	0	0	0	0	0	0
C09G9.8	C09G9.8	WBGene00007497	0	0	0	0	0	0	0	0	0	0.311639	0	0	0	0	0	0	0	0	0	0	0	0	0	0	0	0	0	0	0	0	0	0	0	0	0	0	0	0	0	0	1.94122	0.132087	0	0	0	0	0
C09H10.1	rpl-42	WBGene00004455	0	0	0	0	0	0	0	0	0	0	0	0	0	0	0	0	0	0	0	0	0	0	0	0	0	0	0	0	0	0	0	0	0	0	0	0	0	0	0	0	0	0	0	0	0	0	0
C09H10.10	C09H10.10	WBGene00007504	28.5189	28.3724	34.2827	11.196	46.1084	39.2092	36.1747	7.88194	7.24725	12.7194	11.3455	23.8526	22.8032	0.91434	1.7625	2.3766	2.55057	1.72928	3.08839	5.74974	4.46964	1.62032	10.1006	30.8952	0	3.33224	3.13298	6.33937	1.77902	0.839022	2.46059	5.25458	2.70568	3.77298	3.97864	3.595	5.55868	7.33214	4.2373	4.98285	5.01912	4.23316	14.3775	15.5623	6.1901	0	9.11876
C09H10.2	rpl-41	WBGene00004454	10.1741	3.90104	3.87078	10.667	12.9698	12.297	4.4189	37.3498	40.2191	47.9266	41.0585	22.9639	24.585	67.2268	47.8138	61.046	49.4216	65.2665	61.1037	43.4776	78.261	85.9356	41.373	19.9809	75.321	72.3694	105.415	74.5463	91.8288	92.8373	110.693	108.616	86.5991	105.645	82.5177	87.7366	113.117	117.233	100.93	92.2294	123.917	104.702	82.3395	51.1329	131.47	124.635	132.703
C09H10.3	nuo-1	WBGene00003831	67.38	98.0199	82.3124	99.2225	82.0224	94.0452	93.3391	117.179	125.695	139.607	130.147	101.128	78.3307	146.471	159.071	151.704	163.465	145.931	139.96	156.551	196.189	154.339	148.193	94.9348	96.5578	104.476	138.401	127.276	142.81	145.728	133.068	149.114	145.573	145.457	125.858	113.313	170.283	115.592	144.623	146.275	177.801	144.789	142.441	91.1163	147.9	68.1378	84.6135
C09H10.4	C09H10.4	WBGene00043120	0	0	0	0	0	0	0	0.12722	0.489037	0.271359	0.289588	0	0	0.787395	0	1.19196	0.974551	1.15863	0.90861	1.38135	1.04583	0	1.37606	0.557906	0	0	1.28253	1.02754	0	1.14071	1.28505	1.5204	0.448697	0.280663	0.492828	0.443315	0	2.57993	1.37645	0.504349	2.2062	1.33462	0	0.698306	6.1901	5.1133	3.08471
C09H10.5	C09H10.5	WBGene00007499	0	0	0	0	0	0	0	0.496693	0.123597	0.677812	0	0.718698	0	0	0	0	0	0.202301	0.897252	0	0	1.01287	0	3.04202	0	0	0	0	0	0	0	0	0.332311	0	0	0.855728	0.540871	0.81124	0	0	0	0	0	2.38797	0	0	0
C09H10.6	nasp-1	WBGene00007500	61.9376	48.5254	22.7764	63.6009	46.9533	51.4688	69.7628	89.3676	92.1537	100.686	135.591	139.135	134.548	65.0017	85.9337	90.4996	97.2747	78.5778	102.697	89.9339	125.271	114.506	187.038	130.832	151.233	124.45	136.999	86.0605	99.3748	114.964	118.856	117.663	112.392	114.229	88.5319	106.554	122.529	160.448	163.699	103.688	224.274	201.417	241.783	115.392	97.6094	140.556	100.218
C09H10.7	apc-17	WBGene00007501	0	1.94423	1.81653	0	0	0	0	0.896651	0.773171	0	1.5403	1.11496	1.5134	0.787395	0	2.33427	0	0.687186	0.590868	1.36744	0.9172	0	0.817476	3.04202	0	0.90198	0.639352	1.9223	2.06279	0.839022	1.5593	2.64212	0.728326	0.365783	0.978647	0	0.581258	1.06288	0	0	0.749543	1.20871	0	2.1695	0	0	2.28599
C09H10.8	glb-4	WBGene00007502	0	0	0	0	0	0	0	0	0	0	0	0	0	0	0	0	0	0	0.33084	1.17145	0	0	0.622063	0	0	0	0	0	0	0	0	0	0	0	0	0	0	0	0	0	0	0	0	0	0	0	0
C09H10.9	C09H10.9	WBGene00007503	0	0	0	0	4.64887	0	0	0.249995	0	0	0.291027	0.39626	0	1.94127	0	0	0	0.334459	0	0.502594	0	2.40419	0	0	0	0.764779	0	0	0	2.30222	0	0	0	0	0	0	0.300071	0	0	0	0	0.313154	0	0	0	0	0
C09H5.1	C09H5.1	WBGene00015659	0	0	0	0	0	0	0	0	0	0	0	0	0	0	0	0	0	0	0	0	0	0	0	0	0	0	0	0	0	0	0	0	0	0	0	0	0	0	0	0	0	0	0	0	0	0	0
C09H5.2	catp-3	WBGene00015660	0	0	0	0	0	0	0	0	0	0	0	0	0	0	0	0	0	0	0	0	0	0	0	0	0	0	0	0	0	0	0	0	0	0	0	0	0	0	0	0	0	0	0	0	0	0	0
C09H5.3	str-140	WBGene00006188	0	0	0	0	0	0	0	0	0	0	0	0	0	0	0	0	0	0	0	0	0	0	0	0	0	0	0	0	0	0	0	0	0	0	0	0	0	0	0	0	0	0	0	0	0	0	0
C09H5.4	str-143	WBGene00006190	0	0	0	0	0	0	0	0	0	0	0	0	0	0	0	0	0	0	0	0	0	0	0	0	0	0	0	0	0	0	0	0	0	0	0	0	0	0	0	0	0	0	0	0	0	0	0
C09H5.5	str-144	WBGene00006191	0	0	0	0	0	0	0	0	0	0	0	0	0	0	0	0	0	0	0	0	0	0	0	0	0	0	0	0	0	0	0	0	0	0	0	0	0	0	0	0	0	0	0	0	0	0	0
C09H5.6	str-131	WBGene00006180	0	0	0	0	0	0	0	0	0	0	0	0	0	0	0	0	0	0	0	0	0	0	0	0	0	0	0	0	0	0	0	0	0	0	0	0	0	0	0	0	0	0	0	0	0	0	0
C09H5.7	C09H5.7	WBGene00015661	0	0	0	0	0	0	0	0	0	0	0	0	0	0	0	0	0	0	0	0	0	0	0	0	0	0	0	0	0	0	0	0	0	0	0	0	0	0	0	0	0	0	0	0	0	0	0
C09H5.9	str-130	WBGene00006179	0	0	0	0	0	0	0	0	0	0	0.667111	0	0	0	0	0	0	0	0	0	0	0	0	0	0	0	0	0	0	0	0	0	0	0	0	0	0	0	0	0	0	0	0	0	0	0	0
C09H6.1	spr-4	WBGene00005009	30.9347	31.4926	33.1007	29.2196	34.3445	26.338	32.2443	38.2696	39.242	31.7459	38.8755	14.7114	17.043	51.1848	57.8318	51.7162	47.0322	58.4619	53.4508	71.1165	44.6741	41.1602	30.2903	26.4235	65.3767	88.6231	114.758	136.627	104.411	107.06	76.6034	94.0998	128.783	103.173	112.494	129.332	96.0373	83.5341	90.0236	87.3031	76.4978	95.7856	43.0654	24.917	68.7125	48.0249	52.5754
C09H6.2	lin-10	WBGene00002999	24.015	18.0079	18.6119	29.6623	19.5231	27.9905	25.3402	11.4293	15.7185	16.4307	12.4931	10.954	2.8541	13.9423	30.4425	26.7122	21.9926	14.08	16.9653	31.1332	28.034	24.3515	14.1632	15.6235	17.5056	21.9121	9.92195	13.6653	21.1315	13.9626	17.678	16.9593	17.7339	9.98998	14.1363	18.0833	14.0213	12.8427	42.3868	38.8463	10.9915	9.54493	10.9784	7.85234	11.9971	0	13.9248
C09H6.3	mau-2	WBGene00003136	43.1274	57.6608	46.4727	52.8577	60.6364	53.5024	28.2796	45.5246	41.9544	37.5201	32.8809	33.9615	25.2699	58.3856	44.4532	52.6115	53.7321	49.2757	47.3014	60.1512	31.6241	16.8603	32.73	27.3264	32.9429	22.1451	21.5614	18.1979	11.7434	25.7672	24.6789	22.205	24.9154	26.9633	35.3107	23.6405	26.2716	10.7423	11.827	15.3175	11.8083	15.1839	25.0133	33.2132	11.9971	13.3224	11.5397
C10A4.1	C10A4.1	WBGene00015662	0	0	3.87078	0	0	0	0	0	0	0.311639	0	0.485098	2.33071	0	0	0	0	0	0	0	0	0.907762	0	0	0	0	0	0	0	0	0	0	0	0	0	0	0.300071	0.526187	0	0	0	0	0.337356	0.34911	0	0	0
C10A4.10	C10A4.10	WBGene00050957	0	0	0	0	0	0	0	0	0	0	0	0	0	0	0	0	0.515653	0	0	0	0	0	0	0	0	0	0	1.78974	0	0	0	0	0	0	0	0	0	0	0	0	0	0	0	0	0	0	0
C10A4.13	C10A4.13	WBGene00206485	0	0	0	0	0	0	0	0	0	0	0	0	0	0	0	0	0	0	0	0	0	0	0	0	0	0	0	0	0	0	0	0	0	0	0	0	0	0	0	0	0	0	0	0	0	0	0
C10A4.2	C10A4.2	WBGene00015663	0	0	0	0	0	0	0	0	0	0	0	0	0	0	0	0	0	0	0	0	0	0	0	0	0	0	0	0	0	0	0	0	0	0	0	0	0	0	0	0	0	0	0	0	5.80703	0	0
C10A4.3	C10A4.3	WBGene00015664	0	0	0	0	0	0	0	0	0	0	0	0	0	0	0	0	0	0	0	0	0	0	0	0	0	0	0	0	0	0	0	0	0	0	0	0	0	0	0	0	0	0	0	0	0	0	0
C10A4.4	C10A4.4	WBGene00015665	0	0	0	0	0	0	0	0	0	0	0.289588	0	0	0	0	0.595905	0	0	0	0	0	0	0	0	0	0	0	0	0	0	0	0	0	0	0	0	0	0	0	0	0	0	0	0	0	0	0
C10A4.5	gad-2	WBGene00015666	0	0	0	0	0	0.234108	0	0.370979	0.715394	3.21579	5.22506	0.881358	0	2.5455	4.22314	3.3691	5.79517	0.904683	1.53533	9.59761	37.546	32.2297	0.622063	0	3.37094	0	1.34164	0	0	1.97973	3.11898	0.610073	3.3367	2.30011	2.57135	4.54323	10.9342	9.42563	26.7787	113.7	6.85568	4.35836	7.00841	8.05118	0	0	0
C10A4.6	C10A4.6	WBGene00015667	0	0	0	0	0	0	0	0	0	0	0	0	0	0	0	0	0	0	0.295398	0	0	1.01287	0	0	0	0	0	0	0	0	0	0	0	0	0	0	0	0	0	3.16362	0	0	0	0.34911	0	0	0
C10A4.7	C10A4.7	WBGene00015668	0	0	0	0	0	0	0	0.254471	0	0	0	0.39626	0	0	0	0	0	0	0	0	0	0	0.694718	0	0	0	0	0	0	0	0	0	0.329675	0	0	0	0	0	0	0	4.27106	0	0	0	0	0	0
C10A4.8	mnm-2	WBGene00003380	0	0	0	0	0	0	0	0	0	0	0	0	0	0	0.992181	1.68414	1.51863	0.285077	2.13698	1.17145	1.04583	0	0	0	0	0.839141	0.543223	0	1.75289	0	2.75543	1.4593	0.620231	0	0.568734	0.443315	0	0.990855	0	0	0	0	0.936157	0	16.3981	0	1.39494
C10A4.9	C10A4.9	WBGene00045456	0	0	0	0	0	0	0	0	0	0	0	0	0	0	0	0	0	0	0	0	0	0	0	0	0	0	0	0	0	0	0	0	0	0	0	0	0	0	0	0	0	0	0	0	0	0	0
C10B5.1	C10B5.1	WBGene00015670	3.99271	4.19288	3.36307	1.05526	4.64887	3.44496	11.5445	12.8444	11.1169	7.91415	11.1467	9.97905	12.6209	5.21839	11.3287	9.0492	5.19055	5.80055	9.2952	3.54401	3.27578	3.38367	7.03307	4.02865	4.45478	0.419519	0	0	0	6.4058	4.0408	2.87793	2.32323	5.43395	2.81349	0.89377	0.657293	1.33743	3.99259	3.51623	4.23034	2.04961	12.8805	13.4851	0	0	0
C10B5.3	C10B5.3	WBGene00015671	0	0	0	0	0	0	0	0	0.192642	0.627422	0	0	0	0	0.341031	0	0	0.209321	0.245617	0	0	0	0.408688	0	0	0.419519	0	0	1.77902	0	0	0	0.365595	0	0.347808	0	0	0	0	0	1.37201	0	0	0	0	0	0
C10C5.1	C10C5.1	WBGene00007505	0	0	0	0	0	0	0.315135	0.0831624	0	0.338864	1.14079	0.359305	0	0.787395	1.02334	0	0	0.954077	0.721516	0.502594	0	0	0	0	0	0.888768	0	0	0	0.76722	0	0.610073	0	0	0.726952	0.819649	0	0.405571	0	0	0	0	0	0.593779	0	0	0
C10C5.2	C10C5.2	WBGene00007506	0	0	0	0	0	0	0	1.35602	0	1.8168	3.46914	0	0	7.82089	4.35174	9.39101	8.96711	3.65378	7.6015	1.36744	4.19298	0.783866	0.993775	0	0	1.0783	0.639352	1.11373	0	1.53463	0.90129	0	0.279629	1.30323	0.583543	0.74792	0	0	0	0.819757	0	0	0	0	0	0	0
C10C5.3	C10C5.3	WBGene00007507	0	0	0	0	0	0	0	0	0	0	0	0	0	0	0	0.792007	0.974551	0	0	0	28.4789	28.5366	0	0	3.37094	0	0.543223	0	0	1.67825	0	0.511496	0	0.234464	0	1.75437	0	0	96.6398	94.6765	0	0.369881	0	4.08872	5.80703	0	0
C10C5.4	C10C5.4	WBGene00007508	0	0	0	0	0	0	0	0	0	0	0	0	0	0	0	0	0.632987	0	0	0	66.0053	22.3956	0	0	0	0	0	2.06538	0	2.81896	0	3.1605	0.545905	0.933692	0	0	1.08187	0.81124	154.298	109.336	0	0.715663	0	13.9539	0	0	0
C10C5.5	C10C5.5	WBGene00007509	0	0	0	0	0	0	0	0	0	0	0	0	0	0	0	0	0	0	0.383242	0	26.5614	23.8954	0	0	0	0.419519	0	0	0	0.839022	2.46059	1.82087	0.653366	1.51133	0.722232	1.43227	1.27183	2.05374	125.778	149.531	1.56137	2.56137	0	15.795	0	0	0
C10C5.6	daf-15	WBGene00000911	142.119	163.39	170.668	172.438	194.004	207.016	197.042	113.014	141.216	185.29	171.216	150.924	178.845	89.6899	59.4166	101.621	83.0678	85.4412	83.8547	156.924	147.805	130.874	156.682	155.097	64.7398	122.418	106.582	90.7383	91.3207	98.9885	59.861	95.0693	94.1313	100.738	105.594	117.082	158.839	106.983	133.377	116.91	183.54	182.789	157.812	101.186	92.2396	64.0922	68.7959
C10C5.7	C10C5.7	WBGene00007511	0	0	0	0	0	0	0	0	0	0	0	0	0	0	0	0	0	0	0	0	0.9172	3.43606	0	0	0	0	0	0	0	0	0	0	0	0	0	0	0	0	0.68814	0	0	0	0	0	0	0	0
C10C6.1	kin-4	WBGene00002192	244.628	321.743	253.694	215.61	255.189	167.475	225.833	240.007	225.485	181.267	162.199	161.608	153.008	207.907	203.696	256.604	195.355	223.015	190.803	103.099	75.9707	91.6908	158.49	151.125	100.488	114.62	66.2243	65.9808	94.4894	116.115	68.8415	65.938	92.3093	101.273	75.8359	91.5378	82.1599	38.3185	55.2561	39.8426	66.3773	100.774	122.644	114.307	65.6538	36.5031	37.7637
C10C6.2	npr-3	WBGene00007006	0	0	0	0	0	2.50818	0.315135	0.263513	0	0	0	0	0	0.787395	1.17485	0	0	0.285077	0	0	0	0	0	0	0	0	0	0	0	0	0	0	0	0	0	1.78025	0	0	0	0	0	0	0	0	0	0	0
C10C6.3	C10C6.3	WBGene00007512	0	0	0	0	0	0	0	0	0	0	0	0	0	0	0.404826	0	0	0	0	0	0.9172	0	0.470541	0	0	0	0	0	0	0	0	0	0	0	0	0	0	0	1.25712	0	0	0	0	0	0	0	0
C10C6.5	wht-2	WBGene00007513	20.3607	14.673	16.4293	18.3575	13.8331	13.3214	41.183	26.2786	23.9786	26.967	31.5412	43.2267	76.7088	15.9567	11.984	14.347	11.2252	6.58249	13.2437	5.53475	31.9002	29.1179	34.6855	71.695	25.8799	10.3543	15.8901	7.73325	9.37022	13.9881	16.0505	10.5266	12.1007	10.1163	13.3251	13.6411	14.8087	8.69601	155.898	202.488	23.5126	28.9502	72.7223	123.592	0	3.03728	3.97575
C10C6.6	C10C6.6	WBGene00007514	63.2808	102.538	66.8032	100.379	101.013	78.8933	75.384	85.8097	98.7263	121.705	119.613	105.781	106.62	61.2141	81.0211	55.8262	74.1704	65.8078	68.5312	87.6749	110.123	121.807	152.316	104.252	60.9448	76.089	76.2507	52.9585	75.1183	76.5587	48.1037	69.405	66.9892	66.0422	53.5359	70.3986	90.0766	57.8445	106.416	46.3979	152.609	125.36	174.557	101.777	85.388	69.5677	36.6209
C10C6.7	C10C6.7	WBGene00007515	0	0	0	0	0	0.234108	0.315135	0.52682	0	0.966286	0.943605	1.61729	0	0	0	0.74606	2.09474	0	0.235491	1.35713	12.4881	7.30683	1.63592	0	0	0	0	0	0	0	0	0	0.64903	0.234464	0.899836	0.460697	0.357222	1.0525	34.8719	28.5633	1.87941	0.132087	0	2.78565	0	3.67578	0
C10E2.1	C10E2.1	WBGene00015672	0	0	0	0	0	0	0	0.0831624	0	0	0	0	0	0	1.21284	0	0.632987	0	0	0	0	0	0	0	0	1.0783	0	0	0	0	0	0	0	0	0	0	0	1.06288	0	0	0	0	0	0	0	4.53332	0
C10E2.2	C10E2.2	WBGene00015673	0	0	3.49787	0	0	3.29142	0	1.58622	1.38279	2.96856	0.728805	2.75235	0	1.75791	2.46442	2.63012	0.515653	4.46869	3.41959	0	0	1.62032	1.69102	0	0	0.764779	0	0	0	0	0	1.46618	1.22019	5.07563	0.535286	1.34791	1.02401	0	0	0	0.902559	0.237794	0	0.698306	0	0	0
C10E2.3	hda-4	WBGene00001837	0	0	0	0	0	0	0	0.393789	0.245476	0	0.871713	0.359305	0.262177	0.787395	0	0	1.54734	0.53676	1.01219	1.38135	0	0	0.496827	0.557906	0	1.80418	0.639352	0	0	0	0	0.733	0.258851	0.448663	0	0	0.333352	0	0	0.504349	1.62386	0.313154	0	0	0	0	0
C10E2.4	C10E2.4	WBGene00015674	0	0	1.80887	0	0	0	0	0	0	0	0.289588	0	0.504344	0	0	0	0	0	0	0	0	0	0	0	0	0.419519	0	3.08336	0	0	0	3.21885	0	1.24685	0	0.391033	0	4.18029	0	0	0	0.939692	0	0	0	0	0
C10E2.5	C10E2.5	WBGene00015675	0	0	0	0	0	0	0	0	0	0	0	0	0	0	0	0	0.515653	0	0	0	0	1.01287	0	0	0	0.888768	0	0	0	0.76722	0	2.94717	0	1.15479	0	0.593272	0	3.0474	0	0	0.811831	0.313154	0	0.34911	0	0	0
C10E2.6	C10E2.6	WBGene00015676	14.2473	12.7509	5.55977	29.9467	15.7452	25.5568	19.0364	66.2397	57.1978	56.6402	57.3877	49.5707	34.1545	68.2765	82.7606	76.0166	80.7149	77.1946	76.3334	68.1389	92.6741	92.1532	51.6522	43.2645	58.6257	39.9041	36.783	65.0324	40.5507	47.9125	56.0241	118.73	48.9295	60.4087	45.4988	54.4325	56.9758	74.8299	37.6605	26.108	53.8764	68.7531	53.6286	39.886	11.9971	12.3617	26.961
C10F3.1	cpg-4	WBGene00015677	34.063	21.988	26.1288	19.4708	13.95	38.2712	51.4226	3.66554	3.25915	7.83453	7.2107	33.8512	66.2719	1.8289	1.61767	0.74606	1.63584	1.37145	0.714082	0.516505	2.22969	2.40419	12.4382	76.4016	0	0	1.93766	1.11373	2.06279	2.37365	0	0.610073	0.332891	0.365783	3.89958	0	1.14682	3.14464	1.68744	1.60363	7.29594	5.60878	22.2793	68.4143	0	0	0
C10F3.2	dhs-16	WBGene00000979	0	0	0	0	0	0	0	0	0	0	0	0	0	0	0	0	0	0	0	0	0	0	0	0	0	0	0	0	0	0	0	0	0	0	0	0	0	0	0	0	0	0	0	0	0	0	0
C10F3.3	acy-2	WBGene00000069	0	0	0	0	0	0	0.315135	0.205833	0.397831	0	0	0	0	0	0	0	0	0	0	0	0	0	0	0	0	0	0	0	0	0	0	0	0	0	0	0	0	0	0.68814	0	0	0	0	0	0	0	0
C10F3.4	mcp-1	WBGene00015678	4.06816	1.94423	3.49787	2.90444	5.35909	1.40551	2.20756	9.85184	6.39889	8.40437	9.42203	4.65261	6.07759	7.74983	9.95903	4.61473	5.8239	5.53031	13.5159	17.5764	33.8467	14.2135	8.94798	12.2192	0	11.0255	15.4094	11.7773	9.7218	6.90955	12.237	9.07798	9.18106	8.6588	9.72192	11.1039	10.745	16.0995	17.3947	28.0233	12.0715	14.0897	7.71809	8.29398	5.80703	0	11.0243
C10F3.5	pcm-1	WBGene00003954	32.601	35.5195	31.7898	25.004	39.6046	25.0805	48.5216	26.7556	28.2884	11.0172	16.7258	23.5254	43.7686	19.7035	13.4345	9.68656	12.8535	17.4913	17.8741	13.5367	12.8506	17.89	10.1716	28.9689	21.8478	13.1778	12.0914	21.3127	8.82922	12.7088	7.7362	12.7252	17.8058	16.5686	21.6126	21.0611	6.96171	16.1053	17.9438	28.7292	9.68258	15.8747	14.6696	44.5101	6.1901	13.2203	22.4483
C10F3.6	fut-8	WBGene00001508	0	0	0	0	0	0	0	0	0	0	0	0	0	0	0	0	0	0	0	0	0	0	0	0	0	0	0	0	0	0	0	0	0	0	0	0	0	0	1.13811	0	0	0.319305	0	0	0	0	0
C10F3.7	C10F3.7	WBGene00015679	0	0	0	0	0	0	0	0	0	0	0	0	0	0	0	0	0	0	0	0	0	0	0	0	0	0	0	0	0	0	0	0	0	0	0	0	0	0	0	0	0	0	0	0	0	0	0
C10G11.1	C10G11.1	WBGene00015685	0	0	0	0	0	0	0	0.16076	0	0.338864	1.21556	0.485098	0	0	0	0	0	0	0	0	0	0	0	0	0	0	0	0	0	0	0	0	0	2.5375	0	0	0	0	1.16704	0	0	0	0	0	0	0	0
C10G11.10	C10G11.10	WBGene00015690	0	0	0	0	0	0.468274	0	0.16076	0.245476	0.966286	2.11282	0	0	0	0	0	0	0	0	0	0	0	0	0	0	0	0	0	0	0	1.5593	0	0	2.5375	0	0	0.840943	0.405571	1.72939	0.819757	0	0	0	0	0	0	0
C10G11.2	srh-50	WBGene00005273	0	0	0	0	0	0	0	0	0	0	0	0	0	0	0	0	0	0	0	0	0	0	0	0	0	0	0	0	0	0	0	0	0	0	0	0	0	0	0	0	0	0	0	0	0	0	0
C10G11.3	srh-51	WBGene00005274	0	0	0	0	0	0	0	0	0	0	0	0	0	0	0	0	0	0	0	0	0	0	0	0	0	0	0	0	0	0	0	0	0	0	0	0	0	0	0	0	0	0	0	0	0	0	0
C10G11.4	srh-49	WBGene00005272	0	0	0	0.263717	0	0	0	0.168193	0	0.311639	0	0	0	0	0	0	0	0	0	0	0	0	0	0	0	0	0	0	0	0	0	0	0	0	0	0	0	2.3334	0	0.801719	0	0	0	0	0	0	0
C10G11.5	pnk-1	WBGene00004068	201.714	229.478	233.177	157.772	162.744	139.115	162.945	78.0488	76.3106	78.9144	66.3601	85.07	60.6774	17.4747	11.2011	23.5907	18.8645	13.3926	14.2911	24.2575	13.6487	16.5313	65.4044	62.913	10.3265	7.10337	9.35756	7.32992	13.6399	9.26965	13.797	10.9244	12.2205	8.93648	13.5279	12.6316	13.4194	14.7828	15.3433	23.8227	35.1465	26.0736	77.3921	63.3107	32.1953	25.2111	10.1336
C10G11.6	C10G11.6	WBGene00015686	0.997811	1.12418	0	0	0	0	0	0.168193	0.571014	1.96501	0	0.376627	0.262177	0	1.21284	0	0.515653	0.285077	0.2565	0	0	0.907762	0.496827	6.08478	0	0	0.643177	0	0	0	0	0	0	0	0.661598	0	0	0	0	0	0.811831	0	0.626765	0.694262	0	0	0
C10G11.7	C10G11.7	WBGene00015687	539.746	463.075	625.81	568.485	448.163	550.266	547.945	459.297	461.544	425.634	523.088	374.714	265.371	785.303	761.863	731.898	877.24	821.687	847.902	878.635	955.679	875.169	646.259	341.182	999.886	1285.66	1185.93	1364.38	1122.25	1081.2	1151.03	1205.04	1152.68	1138.48	1109.21	1162.82	1145.75	1420.24	1206.95	1252.76	1256.86	1226.31	614.995	438.743	1549.54	1231.44	1517.25
C10G11.8	C10G11.8	WBGene00015688	0	0	0	0	0	0	0	0	0	0	0	0	0	0	0	0	0	0	0	0	0	0	0	0	0	0	0	0	0	0	0	0	0	0	0	0	0	0	0	0	0	0	0	0	0	0	0
C10G11.9	C10G11.9	WBGene00015689	0	0	0	0	0	0	0	0.143794	0	0.677812	0.289588	0	0	0	0	0	0	0.209321	0.445441	1.68795	0	0	0.579929	0	6.7427	0	2.75102	0	0	0	0	1.83995	0	0.448663	0	0.378748	0.540871	0	0	0	0	0	0	0	0	0	0
C10G6.1	egal-1	WBGene00015680	0	8.33265	3.87078	2.88434	1.20939	0.234108	5.77147	3.59973	4.43085	4.11479	2.17813	3.36092	1.64339	3.5162	3.27234	2.03392	1.60751	3.42965	2.16966	1.03314	0	0	2.58915	4.32405	1.51999	2.07307	0	1.03784	0	1.53463	0.90129	1.46618	3.30391	0.971667	2.65815	1.31642	0.813466	1.62288	1.93879	0.504349	4.68334	4.37517	2.48181	3.03006	6.1901	0	0
[truncated: 18,917 more rows]
[truncated: 72 more columns]

## Sheet: Standardized expression
			P0	AB	P1	ABa	ABp	EMS	P2	ABax	ABpx	MS	E	C	P3 (8-cell stage)	ABala	ABalp	ABara	ABarp	ABpxa	ABpxp	MSx	Ea 15	Ep 15	Cx	P3 15	ABalaa	ABalap	ABalpa	ABalpp	ABaraa	ABarap	ABarpa	ABarpp	ABpxaa	ABpxap	ABpxpa	ABpxpp	MSxa	MSxp	Ea (28-cell stage)	Ep (28-cell stage)	Cxa	Cxp	D	P4 (28-cell stage)	ABalaaa	ABalaap	ABalapa
[truncated: 20,517 more rows]
[truncated: 72 more columns]

[truncated: 2 more sheets: Differential gene expression, Standard deviation of expressio]
